# Supplementary material for: Bioactivity of Methoxylated and Methylated 1-Hydroxynaphthalene-2-Carboxanilides: Comparative Molecular Surface Analysis
Source: MDPI journal article supplement (doi:10.3390/molecules24162991), 2019-08-18
Supplement: s1 [file s1]

## Supplementary Materials

# Bioactivity of Methoxylated and Methylated 1-Hydroxynaphthalene-2-Carboxanilides: Comparative Molecular Surface Analysis<sup>†</sup>

Hana Michnová <sup>1,2</sup>, Šárka Pospíšilová <sup>1,2</sup>, Tomáš Goněk <sup>3,\*</sup>, Iva Kapustíková <sup>4,\*</sup>, Peter Kollár <sup>5</sup>, Violetta Kozik <sup>6</sup>, Robert Musiol <sup>6</sup>, Izabela Jendrzewska <sup>6</sup>, Ján Vančo <sup>1</sup>, Zdeněk Trávníček <sup>1</sup>, Alois Čížek <sup>2</sup>, Andrzej Bak <sup>6,\*</sup> and Josef Jampílek <sup>1,7,\*</sup>

<sup>1</sup> Division of Biologically Active Complexes and Molecular Magnets, Regional Centre of Advanced Technologies and Materials, Faculty of Science, Palacký University, Šlechtitelů 27, 78371 Olomouc, Czech Republic; michnova.hana@gmail.com (H.M.); sharka.pospisilova@gmail.com (S.P.); jan.vanco@upol.cz (J.V.); zdenek.travnicek@upol.cz (Z.T.)

<sup>2</sup> Department of Infectious Diseases and Microbiology, Faculty of Veterinary Medicine, University of Veterinary and Pharmaceutical Sciences, Palackého třída 1/3, 61242 Brno, Czech Republic; cizeka@vfu.cz

<sup>3</sup> Department of Chemical Drugs, Faculty of Pharmacy, University of Veterinary and Pharmaceutical Sciences, Palackého třída 1/3, 61242 Brno, Czech Republic

<sup>4</sup> Department of Pharmaceutical Chemistry, Faculty of Pharmacy, Comenius University, Odbojárov 10, 83232 Bratislava, Slovakia

<sup>5</sup> Department of Human Pharmacology and Toxicology, Faculty of Pharmacy, University of Veterinary and Pharmaceutical Sciences, Palackého třída 1/3, 61242 Brno, Czech Republic; kollarp@vfu.cz

<sup>6</sup> Institute of Chemistry, University of Silesia, Szkolna 9, 40007 Katowice, Poland; violetta.kozik@us.edu.pl (V.K.); robert.musiol@us.edu.pl (R.M.); izabela.jendrzewska@us.edu.pl (I.J.)

<sup>7</sup> Department of Analytical Chemistry, Faculty of Natural Sciences, Comenius University, Ilkovičova 6, 84215 Bratislava, Slovakia

\* Correspondence: t.gonec@seznam.cz (T.G.); kapustikova@fpharm.uniba.sk (I.K.); andrzej.bak@us.edu.pl (A.B.); josef.jampilek@gmail.com (J.J.)

<sup>†</sup> Preliminary results presented at the 22<sup>nd</sup> International Electronic Conference on Synthetic Organic Chemistry, 15 November–15 December 2018; Available Online: <https://sciforum.net/conference/ecsoc-22>.

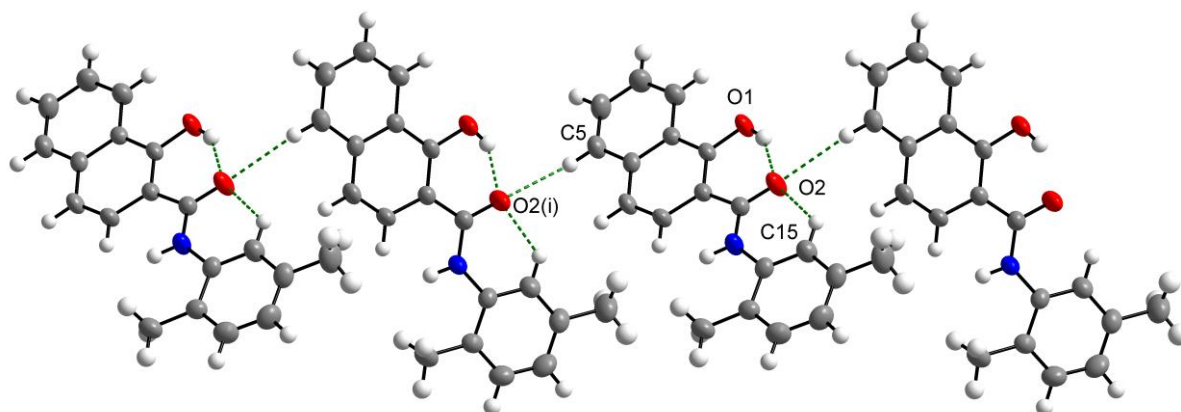

**Figure S1.** Part of the crystal structure of *N*-(2,5-dimethylphenyl)-1-hydroxynaphthalene-2-carboxamide (**11**), showing O–H···O and C–H···O non-covalent contacts (green dashed lines). Symmetry code: (i)  $x+1/2, -y+1/2, z-1/2$ .

**Table S1.** Selected bond lengths (Å) and angles (°) in **11**.

|                   |          |
|-------------------|----------|
| O(1)–C(1)         | 1.349(3) |
| O(2)–C(9)         | 1.249(3) |
| N(1)–C(9)         | 1.351(3) |
| N(1)–C(10)        | 1.418(3) |
| C(1)–C(2)         | 1.387(4) |
| C(1)–C(8A)        | 1.415(4) |
| C(2)–C(3)         | 1.429(3) |
| C(2)–C(9)         | 1.466(4) |
| C(9)–N(1)–C(10)   | 130.9(2) |
| O(1)–C(1)–C(2)    | 122.4(2) |
| O(1)–C(1)–C(8A)   | 116.6(2) |
| C(2)–C(1)–C(8A)   | 121.0(2) |
| C(1)–C(2)–C(3)    | 118.0(2) |
| C(1)–C(2)–C(9)    | 118.9(2) |
| C(3)–C(2)–C(9)    | 123.1(2) |
| C(4)–C(3)–C(2)    | 122.3(3) |
| O(2)–C(9)–N(1)    | 120.9(3) |
| O(2)–C(9)–C(2)    | 121.4(2) |
| N(1)–C(9)–C(2)    | 117.7(2) |
| C(15)–C(10)–C(11) | 121.2(3) |
| C(15)–C(10)–N(1)  | 122.6(3) |
| C(11)–C(10)–N(1)  | 116.2(2) |

**Table S2.** Parameters (in Å, °) of selected non-covalent contacts within crystal structure of **11**.

| D–H···A        | d(D–H) | d(H···A) | d(D···A) | <(DHA) |
|----------------|--------|----------|----------|--------|
| O1–H1A···O2    | 0.84   | 1.78     | 2.524(3) | 146.8  |
| C15–H15A···O2  | 0.95   | 2.23     | 2.858(4) | 122.6  |
| C5–H5A···O2(i) | 0.95   | 2.59     | 3.429(4) | 146.8  |

Symmetry transformation used to generate equivalent atoms: (i)  $x+1/2, -y+1/2, z-1/2$ .

**Table S3.** Matrix of correlation coefficients (n=26,  $\alpha=0.05$ ) of linear relationships between particular partition coefficients and experimental lipophilicity data ( $\log k$ ) for *N*-(methoxy/methyl-phenyl)-1-hydroxynaphthalene-2-carboxamides **1–26**.

|                   | $\log k$ | $\log P^a$ | $\text{miLogP}^b$ | $\text{ClogP}^c$ | $\text{ClogP}^d$ | $\text{ClogP}^e$ | $\text{ClogP}^f$ | $\text{ClogP}^g$ | $\text{MlogP}^h$ | $\text{AlogP}^i$ | $\text{ClogP}^j$ | $\text{ClogP}^k$ |
|-------------------|----------|------------|-------------------|------------------|------------------|------------------|------------------|------------------|------------------|------------------|------------------|------------------|
| $\log k$          | 1        |            |                   |                  |                  |                  |                  |                  |                  |                  |                  |                  |
| $\log P^a$        | 0.37     | 1          |                   |                  |                  |                  |                  |                  |                  |                  |                  |                  |
| $\text{miLogP}^b$ | 0.59     | 0.78       | 1                 |                  |                  |                  |                  |                  |                  |                  |                  |                  |
| $\text{ClogP}^c$  | 0.53     | 0.73       | 0.78              | 1                |                  |                  |                  |                  |                  |                  |                  |                  |
| $\text{ClogP}^d$  | 0.49     | 0.67       | 0.68              | 0.97             | 1                |                  |                  |                  |                  |                  |                  |                  |
| $\text{ClogP}^e$  | 0.65     | 0.64       | 0.83              | 0.66             | 0.57             | 1                |                  |                  |                  |                  |                  |                  |
| $\text{ClogP}^f$  | 0.40     | 0.76       | 0.75              | 0.89             | 0.85             | 0.65             | 1                |                  |                  |                  |                  |                  |
| $\text{ClogP}^g$  | 0.47     | 0.70       | 0.81              | 0.77             | 0.63             | 0.79             | 0.81             | 1                |                  |                  |                  |                  |
| $\text{MlogP}^h$  | 0.44     | 0.81       | 0.76              | 0.82             | 0.80             | 0.70             | 0.93             | 0.74             | 1                |                  |                  |                  |
| $\text{AlogP}^i$  | 0.39     | 0.77       | 0.79              | 0.92             | 0.85             | 0.68             | 0.98             | 0.87             | 0.88             | 1                |                  |                  |
| $\text{ClogP}^j$  | 0.58     | 0.65       | 0.79              | 0.64             | 0.56             | 0.97             | 0.72             | 0.77             | 0.75             | 0.73             | 1                |                  |
| $\text{ClogP}^k$  | 0.44     | 0.82       | 0.76              | 0.83             | 0.73             | 0.59             | 0.81             | 0.76             | 0.72             | 0.86             | 0.60             | 1                |

<sup>a</sup>clogPS, <sup>b</sup>Molinspirations, <sup>c</sup>OSIRIS property explorer, <sup>d</sup>HyperChem 7.0, <sup>e</sup>Sybyl X, <sup>f</sup>Marvin Sketch (ChemAxon) 15, <sup>g</sup>ChemSketch 2015, <sup>h</sup>Dragon 6.0, <sup>i</sup>Dragon 6.0, <sup>j</sup>Kowwin, <sup>k</sup>XlogP3.

**Table S4.** Physicochemical properties and calculated HAC, LE and LELP values of **1–26** analogues.

| Comp.     | R                                                  | $\log k$ | HAC | PET  | LE <sup>a</sup> | LELP <sup>a</sup> |
|-----------|----------------------------------------------------|----------|-----|------|-----------------|-------------------|
| <b>1</b>  | H <sup>a</sup>                                     | 0.6769   | 20  | 31.3 | 0.3153          | 2.1468            |
| <b>2</b>  | 2-OCH <sub>3</sub> <sup>a</sup>                    | 0.8584   | 22  | 199  | 0.2355          | 3.6446            |
| <b>3</b>  | 3-OCH <sub>3</sub> <sup>a</sup>                    | 0.6713   | 22  | 23.5 | 0.2946          | 2.2789            |
| <b>4</b>  | 4-OCH <sub>3</sub> <sup>a</sup>                    | 0.6284   | 22  | 79.5 | 0.2609          | 2.4087            |
| <b>5</b>  | 2,5-OCH <sub>3</sub> <sup>b</sup>                  | 0.8712   | 24  | 201  | 0.2156          | 4.0399            |
| <b>6</b>  | 3,5-OCH <sub>3</sub> <sup>b</sup>                  | 0.7048   | 24  | 13.4 | 0.2651          | 2.6583            |
| <b>7</b>  | 3,4,5-OCH <sub>3</sub> <sup>b</sup>                | 0.5603   | 26  | 468  | 0.1793          | 3.1250            |
| <b>8</b>  | 2-CH <sub>3</sub> <sup>a</sup>                     | 0.5650   | 21  | 62.8 | 0.2801          | 2.0169            |
| <b>9</b>  | 3-CH <sub>3</sub> <sup>a</sup>                     | 0.8235   | 21  | 20.0 | 0.3133          | 2.6288            |
| <b>10</b> | 4-CH <sub>3</sub> <sup>a</sup>                     | 0.8294   | 21  | 28.7 | 0.3123          | 2.6560            |
| <b>11</b> | 2,5-CH <sub>3</sub> <sup>b</sup>                   | 0.7155   | 22  | 52.4 | 0.2724          | 2.6266            |
| <b>12</b> | 2,6-CH <sub>3</sub> <sup>b</sup>                   | 0.5990   | 22  | 60.3 | 0.2685          | 2.2307            |
| <b>13</b> | 3,5-CH <sub>3</sub> <sup>b</sup>                   | 1.0030   | 22  | 8.19 | 0.3047          | 3.2920            |
| <b>14</b> | 2,4,6-CH <sub>3</sub> <sup>b</sup>                 | 0.7477   | 23  | 295  | 0.2149          | 3.4796            |
| <b>15</b> | 2-OCH <sub>3</sub> -5-CH <sub>3</sub> <sup>b</sup> | 1.0603   | 23  | 588  | 0.2575          | 4.1174            |
| <b>16</b> | 2-OCH <sub>3</sub> -6-CH <sub>3</sub> <sup>b</sup> | 0.4574   | 23  | 747  | 0.1903          | 2.4033            |
| <b>17</b> | 2-CH <sub>3</sub> -5-OCH <sub>3</sub> <sup>b</sup> | 0.5362   | 23  | 142  | 0.2342          | 2.2894            |
| <b>18</b> | 2-OCH <sub>3</sub> -4-NO <sub>2</sub> <sup>b</sup> | 0.5434   | 25  | 495  | 0.1851          | 2.9357            |
| <b>19</b> | 2-OCH <sub>3</sub> -5-NO <sub>2</sub> <sup>b</sup> | 0.4827   | 25  | 155  | 0.2133          | 2.2626            |
| <b>20</b> | 2-OCH <sub>3</sub> -5-Br                           | 1.0432   | 23  | 569  | 0.1975          | 5.2816            |
| <b>21</b> | 2-OCH <sub>3</sub> -5-CF <sub>3</sub> <sup>b</sup> | 0.9428   | 26  | 26.4 | 0.2465          | 3.8243            |
| <b>22</b> | 3-CF <sub>3</sub> -4-OCH <sub>3</sub> <sup>b</sup> | 0.8915   | 26  | 18.5 | 0.2739          | 3.2548            |
| <b>23</b> | 3-F-5-OCH <sub>3</sub>                             | 0.7629   | 23  | 10.1 | 0.2966          | 2.5721            |
| <b>24</b> | 2-Cl-5-OCH <sub>3</sub> <sup>b</sup>               | 0.8130   | 23  | 60.9 | 0.2566          | 3.1685            |
| <b>25</b> | 2-CH <sub>3</sub> -5-CF <sub>3</sub> <sup>b</sup>  | 0.7479   | 25  | 36.7 | 0.2484          | 3.0111            |
| <b>26</b> | 3-CF <sub>3</sub> -4-CH <sub>3</sub> <sup>b</sup>  | 1.1411   | 25  | 16.3 | 0.2798          | 4.0789            |

<sup>a</sup>as described by Shultz [1], HAC – heavy atom count, LE – ligand efficiency (1.4×pIC<sub>50</sub>)/HAC, LELP – ligand efficiency dependent lipophilicity clogP/LE

[1] Shultz, M.D. Setting expectations in molecular optimizations: Strengths and limitations of commonly used composite parameters. *Bioorg. Med. Chem.* **2013**, 23, 5980–5991.
