# Supplementary material for: Bioactivity of Methoxylated and Methylated 1-Hydroxynaphthalene-2-Carboxanilides: Comparative Molecular Surface Analysis
Source: Molecules. 2019 Aug 18;24(16):2991. doi: 10.3390/molecules24162991 (PMC6720605; doi:10.3390/molecules24162991)
Supplement: Supplementary file 1 [file molecules-24-02991-s001.zip › Supplementary Files/deposit_dime.cif]

 
data_j
 
_audit_creation_method            'SHELXL-2014/7'
_shelx_SHELXL_version_number      '2014/7'
_chemical_name_systematic         ?
_chemical_name_common             ?
_chemical_melting_point           ?
_chemical_formula_moiety          ?
_chemical_formula_sum
 'C19 H17 N O2' 
_chemical_formula_weight          291.33

loop_
 _atom_type_symbol
 _atom_type_description
 _atom_type_scat_dispersion_real
 _atom_type_scat_dispersion_imag
 _atom_type_scat_source
 'C'  'C'   0.0033   0.0016
 'International Tables Vol C Tables 4.2.6.8 and 6.1.1.4'
 'H'  'H'   0.0000   0.0000
 'International Tables Vol C Tables 4.2.6.8 and 6.1.1.4'
 'N'  'N'   0.0061   0.0033
 'International Tables Vol C Tables 4.2.6.8 and 6.1.1.4'
 'O'  'O'   0.0106   0.0060
 'International Tables Vol C Tables 4.2.6.8 and 6.1.1.4'
 
_space_group_crystal_system       monoclinic
_space_group_IT_number            14
_space_group_name_H-M_alt         'P 21/n'
_space_group_name_Hall            '-P 2yn'
 
_shelx_space_group_comment
;
The symmetry employed for this shelxl refinement is uniquely defined
by the following loop, which should always be used as a source of
symmetry information in preference to the above space-group names.
They are only intended as comments.
;
 
loop_
 _space_group_symop_operation_xyz
 'x, y, z'
 '-x+1/2, y+1/2, -z+1/2'
 '-x, -y, -z'
 'x-1/2, -y-1/2, z-1/2'
 
_cell_length_a                    6.887(4)
_cell_length_b                    16.134(11)
_cell_length_c                    13.620(8)
_cell_angle_alpha                 90
_cell_angle_beta                  99.81(2)
_cell_angle_gamma                 90
_cell_volume                      1491.3(15)
_cell_formula_units_Z             4
_cell_measurement_temperature     120(2)
_cell_measurement_reflns_used      1928
_cell_measurement_theta_min        2.52
_cell_measurement_theta_max       22.27

_exptl_crystal_description       'prism'
_exptl_crystal_colour            'colourless'
_exptl_crystal_density_meas       ?
_exptl_crystal_density_method     ?
_exptl_crystal_density_diffrn     1.298          
_exptl_crystal_F_000              616
_exptl_transmission_factor_min    0.980
_exptl_transmission_factor_max    0.985
_exptl_crystal_size_max           0.240
_exptl_crystal_size_mid           0.200
_exptl_crystal_size_min           0.180
_exptl_absorpt_coefficient_mu     0.084
_shelx_estimated_absorpt_T_min    0.980
_shelx_estimated_absorpt_T_max    0.985
_exptl_absorpt_correction_type    multi-scan
_exptl_absorpt_correction_T_min   ?
_exptl_absorpt_correction_T_max   ?
_exptl_absorpt_process_details    
;
 Bruker (2001). SADABS. Bruker AXS Inc., Madison, Wisconsin, USA.
;
_exptl_absorpt_special_details    ?
_diffrn_ambient_temperature       120(2)
_diffrn_radiation_wavelength      0.71073
_diffrn_radiation_type            MoK\a
_diffrn_source                    ?
_diffrn_measurement_device_type  'Bruker D8 QUEST'
_diffrn_measurement_method       '\f and \w scans'
_diffrn_detector_area_resol_mean  ?
_diffrn_reflns_number             14255
_diffrn_reflns_av_unetI/netI      0.0650
_diffrn_reflns_av_R_equivalents   0.1005
_diffrn_reflns_limit_h_min        -8
_diffrn_reflns_limit_h_max        8
_diffrn_reflns_limit_k_min        -19
_diffrn_reflns_limit_k_max        19
_diffrn_reflns_limit_l_min        -16
_diffrn_reflns_limit_l_max        16
_diffrn_reflns_theta_min          1.974
_diffrn_reflns_theta_max          25.074
_diffrn_reflns_theta_full         25.074
_diffrn_measured_fraction_theta_max   0.997
_diffrn_measured_fraction_theta_full  0.997
_diffrn_reflns_Laue_measured_fraction_max    0.997
_diffrn_reflns_Laue_measured_fraction_full   0.997
_diffrn_reflns_point_group_measured_fraction_max   0.997
_diffrn_reflns_point_group_measured_fraction_full  0.997
_reflns_number_total              2635
_reflns_number_gt                 1487
_reflns_threshold_expression      'I > 2\s(I)'
_reflns_Friedel_coverage          0.000
_reflns_Friedel_fraction_max      .
_reflns_Friedel_fraction_full     .
 
_reflns_special_details
;
 Reflections were merged by SHELXL according to the crystal
 class for the calculation of statistics and refinement.
 
 _reflns_Friedel_fraction is defined as the number of unique
 Friedel pairs measured divided by the number that would be
 possible theoretically, ignoring centric projections and
 systematic absences.
;
 
_computing_data_collection       'Bruker APEX3'
_computing_cell_refinement       'Bruker SAINT'
_computing_data_reduction        'Bruker SAINT'
_computing_structure_solution    'SHELXS-97 (Sheldrick 2008)'
_computing_structure_refinement  'SHELXL-2014 (Sheldrick 2014)'
_computing_molecular_graphics    'Bruker SHELXTL'
_computing_publication_material  'Bruker SHELXTL'
_refine_special_details           ?
_refine_ls_structure_factor_coef  Fsqd
_refine_ls_matrix_type            full
_refine_ls_weighting_scheme       calc
_refine_ls_weighting_details
'w=1/[\s^2^(Fo^2^)+(0.0629P)^2^+0.2111P] where P=(Fo^2^+2Fc^2^)/3'
_atom_sites_solution_primary      ?
_atom_sites_solution_secondary    ?
_atom_sites_solution_hydrogens    geom
_refine_ls_hydrogen_treatment     constr
_refine_ls_extinction_method      none
_refine_ls_extinction_coef        .
_refine_ls_number_reflns          2635
_refine_ls_number_parameters      201
_refine_ls_number_restraints      0
_refine_ls_R_factor_all           0.1246
_refine_ls_R_factor_gt            0.0586
_refine_ls_wR_factor_ref          0.1506
_refine_ls_wR_factor_gt           0.1246
_refine_ls_goodness_of_fit_ref    1.065
_refine_ls_restrained_S_all       1.065
_refine_ls_shift/su_max           0.000
_refine_ls_shift/su_mean          0.000
 
loop_
 _atom_site_label
 _atom_site_type_symbol
 _atom_site_fract_x
 _atom_site_fract_y
 _atom_site_fract_z
 _atom_site_U_iso_or_equiv
 _atom_site_adp_type
 _atom_site_occupancy
 _atom_site_site_symmetry_order  
 _atom_site_calc_flag
 _atom_site_refinement_flags_posn
 _atom_site_refinement_flags_adp
 _atom_site_refinement_flags_occupancy
 _atom_site_disorder_assembly
 _atom_site_disorder_group
O1 O 0.7264(3) 0.25100(13) 0.79002(12) 0.0519(6) Uani 1 1 d . . . . .
H1A H 0.6317 0.2780 0.8054 0.062 Uiso 1 1 calc R U . . .
O2 O 0.4009(3) 0.32665(14) 0.76289(13) 0.0614(7) Uani 1 1 d . . . . .
N1 N 0.2270(3) 0.34557(14) 0.60801(16) 0.0455(6) Uani 1 1 d . . . . .
H1B H 0.2310 0.3373 0.5445 0.055 Uiso 1 1 calc R U . . .
C1 C 0.6946(4) 0.23749(16) 0.69086(18) 0.0352(7) Uani 1 1 d . . . . .
C2 C 0.5271(4) 0.26565(16) 0.62851(18) 0.0352(7) Uani 1 1 d . . . . .
C3 C 0.5063(4) 0.24692(17) 0.52470(18) 0.0405(7) Uani 1 1 d . . . . .
H3A H 0.3922 0.2658 0.4812 0.049 Uiso 1 1 calc R U . . .
C4 C 0.6427(4) 0.20344(17) 0.48643(19) 0.0424(7) Uani 1 1 d . . . . .
H4A H 0.6234 0.1919 0.4170 0.051 Uiso 1 1 calc R U . . .
C5 C 0.9607(4) 0.12886(17) 0.5124(2) 0.0459(8) Uani 1 1 d . . . . .
H5A H 0.9439 0.1162 0.4434 0.055 Uiso 1 1 calc R U . . .
C6 C 1.1258(5) 0.10220(18) 0.5745(2) 0.0533(8) Uani 1 1 d . . . . .
H6A H 1.2231 0.0714 0.5484 0.064 Uiso 1 1 calc R U . . .
C7 C 1.1521(5) 0.12008(19) 0.6763(2) 0.0542(9) Uani 1 1 d . . . . .
H7A H 1.2669 0.1010 0.7191 0.065 Uiso 1 1 calc R U . . .
C8 C 1.0149(4) 0.16459(18) 0.7150(2) 0.0457(8) Uani 1 1 d . . . . .
H8A H 1.0357 0.1770 0.7842 0.055 Uiso 1 1 calc R U . . .
C9 C 0.3820(4) 0.31419(17) 0.67128(19) 0.0396(7) Uani 1 1 d . . . . .
C4A C 0.8152(4) 0.17479(15) 0.54938(18) 0.0349(7) Uani 1 1 d . . . . .
C8A C 0.8416(4) 0.19237(15) 0.65267(18) 0.0323(6) Uani 1 1 d . . . . .
C10 C 0.0589(4) 0.38962(16) 0.62667(19) 0.0382(7) Uani 1 1 d . . . . .
C11 C -0.0882(4) 0.40432(16) 0.5441(2) 0.0403(7) Uani 1 1 d . . . . .
C12 C -0.2538(4) 0.44566(18) 0.5619(2) 0.0541(8) Uani 1 1 d . . . . .
H12A H -0.3553 0.4574 0.5071 0.065 Uiso 1 1 calc R U . . .
C13 C -0.2786(5) 0.47080(18) 0.6559(2) 0.0547(8) Uani 1 1 d . . . . .
H13A H -0.3966 0.4981 0.6647 0.066 Uiso 1 1 calc R U . . .
C14 C -0.1321(5) 0.45644(17) 0.7373(2) 0.0472(8) Uani 1 1 d . . . . .
C15 C 0.0379(4) 0.41601(17) 0.7209(2) 0.0445(7) Uani 1 1 d . . . . .
H15A H 0.1413 0.4064 0.7754 0.053 Uiso 1 1 calc R U . . .
C16 C -0.0688(4) 0.37712(19) 0.4405(2) 0.0541(9) Uani 1 1 d . . . . .
H16A H -0.1857 0.3945 0.3936 0.081 Uiso 1 1 calc R U . . .
H16B H -0.0568 0.3166 0.4388 0.081 Uiso 1 1 calc R U . . .
H16C H 0.0488 0.4025 0.4216 0.081 Uiso 1 1 calc R U . . .
C17 C -0.1548(5) 0.4818(2) 0.8411(2) 0.0703(10) Uani 1 1 d . . . . .
H17A H -0.2950 0.4832 0.8461 0.105 Uiso 1 1 calc R U . . .
H17B H -0.0973 0.5369 0.8557 0.105 Uiso 1 1 calc R U . . .
H17C H -0.0869 0.4417 0.8891 0.105 Uiso 1 1 calc R U . . .
 
loop_
 _atom_site_aniso_label
 _atom_site_aniso_U_11
 _atom_site_aniso_U_22
 _atom_site_aniso_U_33
 _atom_site_aniso_U_23
 _atom_site_aniso_U_13
 _atom_site_aniso_U_12
O1 0.0530(14) 0.0769(14) 0.0245(10) -0.0059(10) 0.0025(9) 0.0151(11)
O2 0.0564(15) 0.0963(17) 0.0294(11) -0.0102(11) 0.0013(10) 0.0249(12)
N1 0.0440(16) 0.0634(16) 0.0287(12) 0.0021(11) 0.0048(11) 0.0129(13)
C1 0.0377(17) 0.0419(16) 0.0254(14) -0.0027(12) 0.0040(12) -0.0058(13)
C2 0.0351(17) 0.0413(16) 0.0290(14) -0.0017(12) 0.0051(12) -0.0029(13)
C3 0.0387(18) 0.0535(18) 0.0270(15) -0.0012(13) -0.0008(13) 0.0029(14)
C4 0.049(2) 0.0510(18) 0.0263(14) -0.0059(13) 0.0046(14) -0.0003(15)
C5 0.053(2) 0.0524(19) 0.0335(16) -0.0026(13) 0.0108(14) 0.0002(16)
C6 0.055(2) 0.061(2) 0.0468(19) -0.0006(16) 0.0177(16) 0.0138(17)
C7 0.049(2) 0.067(2) 0.0461(19) 0.0040(15) 0.0050(15) 0.0130(17)
C8 0.048(2) 0.0530(18) 0.0353(15) 0.0012(14) 0.0038(14) 0.0033(15)
C9 0.0366(17) 0.0500(18) 0.0322(16) -0.0010(14) 0.0056(13) -0.0017(14)
C4A 0.0394(18) 0.0340(15) 0.0329(15) -0.0001(12) 0.0110(13) -0.0036(13)
C8A 0.0350(17) 0.0331(15) 0.0288(14) 0.0003(11) 0.0054(12) -0.0047(12)
C10 0.0372(17) 0.0390(16) 0.0400(17) 0.0021(13) 0.0109(13) 0.0013(13)
C11 0.0399(18) 0.0400(16) 0.0397(16) 0.0037(13) 0.0029(13) -0.0014(14)
C12 0.046(2) 0.059(2) 0.055(2) 0.0028(16) 0.0001(16) 0.0069(16)
C13 0.047(2) 0.0509(19) 0.068(2) 0.0016(17) 0.0151(18) 0.0100(16)
C14 0.054(2) 0.0424(17) 0.0489(19) 0.0029(14) 0.0186(16) 0.0032(15)
C15 0.050(2) 0.0459(17) 0.0371(16) 0.0019(13) 0.0060(13) 0.0056(15)
C16 0.052(2) 0.066(2) 0.0407(18) -0.0003(15) -0.0030(15) -0.0038(16)
C17 0.081(3) 0.074(2) 0.062(2) -0.0021(18) 0.027(2) 0.022(2)
 
_geom_special_details
;
 All esds (except the esd in the dihedral angle between two l.s. planes)
 are estimated using the full covariance matrix.  The cell esds are taken
 into account individually in the estimation of esds in distances, angles
 and torsion angles; correlations between esds in cell parameters are only
 used when they are defined by crystal symmetry.  An approximate (isotropic)
 treatment of cell esds is used for estimating esds involving l.s. planes.
;
 
loop_
 _geom_bond_atom_site_label_1
 _geom_bond_atom_site_label_2
 _geom_bond_distance
 _geom_bond_site_symmetry_2
 _geom_bond_publ_flag
O1 C1 1.349(3) . ?
O1 H1A 0.8400 . ?
O2 C9 1.249(3) . ?
N1 C9 1.351(3) . ?
N1 C10 1.418(3) . ?
N1 H1B 0.8800 . ?
C1 C2 1.387(4) . ?
C1 C8A 1.415(4) . ?
C2 C3 1.429(3) . ?
C2 C9 1.466(4) . ?
C3 C4 1.347(4) . ?
C3 H3A 0.9500 . ?
C4 C4A 1.419(4) . ?
C4 H4A 0.9500 . ?
C5 C6 1.366(4) . ?
C5 C4A 1.407(4) . ?
C5 H5A 0.9500 . ?
C6 C7 1.398(4) . ?
C6 H6A 0.9500 . ?
C7 C8 1.362(4) . ?
C7 H7A 0.9500 . ?
C8 C8A 1.415(4) . ?
C8 H8A 0.9500 . ?
C4A C8A 1.416(3) . ?
C10 C15 1.384(4) . ?
C10 C11 1.400(4) . ?
C11 C12 1.378(4) . ?
C11 C16 1.505(4) . ?
C12 C13 1.381(4) . ?
C12 H12A 0.9500 . ?
C13 C14 1.386(4) . ?
C13 H13A 0.9500 . ?
C14 C15 1.391(4) . ?
C14 C17 1.506(4) . ?
C15 H15A 0.9500 . ?
C16 H16A 0.9800 . ?
C16 H16B 0.9800 . ?
C16 H16C 0.9800 . ?
C17 H17A 0.9800 . ?
C17 H17B 0.9800 . ?
C17 H17C 0.9800 . ?
 
loop_
 _geom_angle_atom_site_label_1
 _geom_angle_atom_site_label_2
 _geom_angle_atom_site_label_3
 _geom_angle
 _geom_angle_site_symmetry_1
 _geom_angle_site_symmetry_3
 _geom_angle_publ_flag
C1 O1 H1A 109.5 . . ?
C9 N1 C10 130.9(2) . . ?
C9 N1 H1B 114.6 . . ?
C10 N1 H1B 114.6 . . ?
O1 C1 C2 122.4(2) . . ?
O1 C1 C8A 116.6(2) . . ?
C2 C1 C8A 121.0(2) . . ?
C1 C2 C3 118.0(2) . . ?
C1 C2 C9 118.9(2) . . ?
C3 C2 C9 123.1(2) . . ?
C4 C3 C2 122.3(3) . . ?
C4 C3 H3A 118.9 . . ?
C2 C3 H3A 118.9 . . ?
C3 C4 C4A 120.2(2) . . ?
C3 C4 H4A 119.9 . . ?
C4A C4 H4A 119.9 . . ?
C6 C5 C4A 120.9(3) . . ?
C6 C5 H5A 119.6 . . ?
C4A C5 H5A 119.6 . . ?
C5 C6 C7 120.2(3) . . ?
C5 C6 H6A 119.9 . . ?
C7 C6 H6A 119.9 . . ?
C8 C7 C6 120.8(3) . . ?
C8 C7 H7A 119.6 . . ?
C6 C7 H7A 119.6 . . ?
C7 C8 C8A 120.3(3) . . ?
C7 C8 H8A 119.8 . . ?
C8A C8 H8A 119.8 . . ?
O2 C9 N1 120.9(3) . . ?
O2 C9 C2 121.4(2) . . ?
N1 C9 C2 117.7(2) . . ?
C5 C4A C8A 118.8(2) . . ?
C5 C4A C4 122.0(2) . . ?
C8A C4A C4 119.2(2) . . ?
C8 C8A C1 121.7(2) . . ?
C8 C8A C4A 119.0(3) . . ?
C1 C8A C4A 119.3(2) . . ?
C15 C10 C11 121.2(3) . . ?
C15 C10 N1 122.6(3) . . ?
C11 C10 N1 116.2(2) . . ?
C12 C11 C10 116.6(3) . . ?
C12 C11 C16 120.9(3) . . ?
C10 C11 C16 122.4(3) . . ?
C11 C12 C13 122.8(3) . . ?
C11 C12 H12A 118.6 . . ?
C13 C12 H12A 118.6 . . ?
C12 C13 C14 120.3(3) . . ?
C12 C13 H13A 119.8 . . ?
C14 C13 H13A 119.8 . . ?
C13 C14 C15 117.9(3) . . ?
C13 C14 C17 121.9(3) . . ?
C15 C14 C17 120.2(3) . . ?
C10 C15 C14 121.1(3) . . ?
C10 C15 H15A 119.4 . . ?
C14 C15 H15A 119.4 . . ?
C11 C16 H16A 109.5 . . ?
C11 C16 H16B 109.5 . . ?
H16A C16 H16B 109.5 . . ?
C11 C16 H16C 109.5 . . ?
H16A C16 H16C 109.5 . . ?
H16B C16 H16C 109.5 . . ?
C14 C17 H17A 109.5 . . ?
C14 C17 H17B 109.5 . . ?
H17A C17 H17B 109.5 . . ?
C14 C17 H17C 109.5 . . ?
H17A C17 H17C 109.5 . . ?
H17B C17 H17C 109.5 . . ?
 
loop_
 _geom_hbond_atom_site_label_D 
 _geom_hbond_atom_site_label_H 
 _geom_hbond_atom_site_label_A 
 _geom_hbond_distance_DH 
 _geom_hbond_distance_HA 
 _geom_hbond_distance_DA 
 _geom_hbond_angle_DHA 
 _geom_hbond_site_symmetry_A 
O1 H1A O2  0.84 1.78 2.524(3) 146.8 .
C15 H15A O2  0.95 2.23 2.858(4) 122.6 .
 
_refine_diff_density_max    0.196
_refine_diff_density_min   -0.228
_refine_diff_density_rms    0.050

_shelx_res_file
;

    j.res created by SHELXL-2014/7


TITL jj_2019_01_0m_a.res in P2(1)/n
CELL 0.71073 6.8872 16.1339 13.6203 90.000 99.812 90.000
ZERR 4.00 0.0037 0.0107 0.0076 0.000 0.024 0.000
LATT 1
SYMM -x+1/2, y+1/2, -z+1/2
SFAC C H N O
UNIT 76 68 4 8
LIST 1
TEMP -153
SIZE 0.180 0.200 0.240
ACTA
L.S. 50
FMAP 2
PLAN 20
HTAB
BOND $H

REM Instructions for potential hydrogen bonds
HTAB O1 O2
HTAB C15 O2

WGHT    0.062900    0.211100
FVAR       0.47416
O1    4    0.726369    0.251002    0.790020    11.00000    0.05299    0.07689 =
         0.02448   -0.00588    0.00251    0.01511
AFIX  83
H1A   2    0.631705    0.278032    0.805391    11.00000   -1.20000
AFIX   0
O2    4    0.400876    0.326655    0.762887    11.00000    0.05638    0.09630 =
         0.02938   -0.01020    0.00130    0.02495
N1    3    0.227001    0.345569    0.608005    11.00000    0.04398    0.06344 =
         0.02866    0.00214    0.00479    0.01293
AFIX  43
H1B   2    0.231037    0.337272    0.544527    11.00000   -1.20000
AFIX   0
C1    1    0.694634    0.237487    0.690857    11.00000    0.03768    0.04192 =
         0.02541   -0.00266    0.00398   -0.00582
C2    1    0.527149    0.265655    0.628513    11.00000    0.03514    0.04134 =
         0.02903   -0.00171    0.00506   -0.00287
C3    1    0.506263    0.246920    0.524702    11.00000    0.03866    0.05355 =
         0.02702   -0.00125   -0.00082    0.00292
AFIX  43
H3A   2    0.392189    0.265782    0.481181    11.00000   -1.20000
AFIX   0
C4    1    0.642715    0.203444    0.486428    11.00000    0.04936    0.05095 =
         0.02629   -0.00587    0.00459   -0.00033
AFIX  43
H4A   2    0.623414    0.191927    0.417043    11.00000   -1.20000
AFIX   0
C5    1    0.960716    0.128865    0.512421    11.00000    0.05310    0.05238 =
         0.03347   -0.00264    0.01081    0.00024
AFIX  43
H5A   2    0.943941    0.116231    0.443366    11.00000   -1.20000
AFIX   0
C6    1    1.125840    0.102200    0.574524    11.00000    0.05486    0.06136 =
         0.04683   -0.00061    0.01774    0.01376
AFIX  43
H6A   2    1.223096    0.071424    0.548443    11.00000   -1.20000
AFIX   0
C7    1    1.152071    0.120077    0.676330    11.00000    0.04851    0.06693 =
         0.04615    0.00400    0.00501    0.01300
AFIX  43
H7A   2    1.266917    0.100960    0.719053    11.00000   -1.20000
AFIX   0
C8    1    1.014914    0.164588    0.715023    11.00000    0.04763    0.05295 =
         0.03534    0.00120    0.00383    0.00335
AFIX  43
H8A   2    1.035744    0.177034    0.784196    11.00000   -1.20000
AFIX   0
C9    1    0.382021    0.314186    0.671278    11.00000    0.03664    0.05003 =
         0.03216   -0.00095    0.00560   -0.00169
C4A   1    0.815172    0.174791    0.549383    11.00000    0.03942    0.03401 =
         0.03292   -0.00010    0.01102   -0.00362
C8A   1    0.841553    0.192373    0.652665    11.00000    0.03502    0.03311 =
         0.02883    0.00029    0.00542   -0.00472
C10   1    0.058908    0.389622    0.626666    11.00000    0.03720    0.03899 =
         0.04005    0.00214    0.01086    0.00129
C11   1   -0.088151    0.404323    0.544075    11.00000    0.03995    0.04005 =
         0.03968    0.00369    0.00294   -0.00137
C12   1   -0.253809    0.445657    0.561867    11.00000    0.04557    0.05909 =
         0.05476    0.00285    0.00007    0.00693
AFIX  43
H12A  2   -0.355295    0.457357    0.507123    11.00000   -1.20000
AFIX   0
C13   1   -0.278611    0.470799    0.655858    11.00000    0.04661    0.05093 =
         0.06832    0.00158    0.01513    0.01003
AFIX  43
H13A  2   -0.396645    0.498066    0.664736    11.00000   -1.20000
AFIX   0
C14   1   -0.132120    0.456437    0.737276    11.00000    0.05386    0.04241 =
         0.04887    0.00285    0.01860    0.00321
C15   1    0.037899    0.416012    0.720934    11.00000    0.04982    0.04592 =
         0.03712    0.00190    0.00604    0.00561
AFIX  43
H15A  2    0.141344    0.406360    0.775429    11.00000   -1.20000
AFIX   0
C16   1   -0.068764    0.377121    0.440469    11.00000    0.05181    0.06607 =
         0.04066   -0.00029   -0.00302   -0.00385
AFIX 137
H16A  2   -0.185703    0.394528    0.393556    11.00000   -1.50000
H16B  2   -0.056789    0.316631    0.438802    11.00000   -1.50000
H16C  2    0.048822    0.402493    0.421600    11.00000   -1.50000
AFIX   0
C17   1   -0.154823    0.481771    0.841118    11.00000    0.08060    0.07388 =
         0.06172   -0.00205    0.02725    0.02184
AFIX 137
H17A  2   -0.295049    0.483236    0.846133    11.00000   -1.50000
H17B  2   -0.097279    0.536888    0.855685    11.00000   -1.50000
H17C  2   -0.086918    0.441677    0.889119    11.00000   -1.50000

AFIX   0
HKLF 4

REM  jj_2019_01_0m_a.res in P2(1)/n
REM R1 =  0.0586 for    1487 Fo > 4sig(Fo)  and  0.1246 for all    2635 data
REM    201 parameters refined using      0 restraints

END

WGHT      0.0626      0.2182

REM Instructions for potential hydrogen bonds
HTAB O1 O2
HTAB C15 O2

REM Highest difference peak  0.196,  deepest hole -0.228,  1-sigma level  0.050
Q1    1  -0.2295  0.4054  0.8749  11.00000  0.05    0.20
Q2    1   0.3402  0.4473  0.8337  11.00000  0.05    0.18
Q3    1   1.1536  0.2541  0.8016  11.00000  0.05    0.17
Q4    1  -0.2407  0.5480  0.8355  11.00000  0.05    0.16
Q5    1  -0.0190  0.4823  0.8965  11.00000  0.05    0.15
Q6    1   0.8710  0.0263  0.5064  11.00000  0.05    0.15
Q7    1   0.3986  0.3498  0.4146  11.00000  0.05    0.14
Q8    1   0.7492  0.0448  0.4219  11.00000  0.05    0.14
Q9    1   0.0362  0.2426  0.5243  11.00000  0.05    0.14
Q10   1  -0.4618  0.4198  0.5637  11.00000  0.05    0.14
Q11   1  -0.0425  0.5819  0.9477  11.00000  0.05    0.14
Q12   1   0.5643  0.3622  0.6176  11.00000  0.05    0.14
Q13   1  -0.0581  0.3689  0.9419  11.00000  0.05    0.13
Q14   1   1.1902  0.2013  0.6762  11.00000  0.05    0.13
Q15   1   0.2013  0.4418  0.7830  11.00000  0.05    0.13
Q16   1  -0.2639  0.4997  0.4590  11.00000  0.05    0.13
Q17   1  -0.1122  0.4668  0.3645  11.00000  0.05    0.13
Q18   1  -0.2509  0.4834  0.3626  11.00000  0.05    0.12
Q19   1  -0.3467  0.5608  0.4613  11.00000  0.05    0.12
Q20   1  -0.4858  0.3787  0.4408  11.00000  0.05    0.12
;
_shelx_res_checksum   31872

_shelx_hkl_file
;
   1   0   0   -0.60    0.90
  -1   0   0   -0.40    0.70
   2   0   0    8.20    1.80
  -2   0   0    8.00    1.70
  -3   0   0    3.00    2.10
   3   0   0    0.50    2.20
  -4   0   0    0.20    2.00
   4   0   0    1.60    2.40
   5   0   0   -5.70    3.90
  -5   0   0   -4.60    3.80
  -6   0   0    8.90    4.60
  -6   0   0   -6.20    3.00
   6   0   0    3.90    5.70
  -7   0   0   -5.10    6.30
  -7   0   0   -0.80    4.50
   7   0   0    1.40    7.60
  -8   0   0  -12.60    6.70
   8   0   0   -4.30   12.40
  -8   0   0    5.80   10.50
  -1  -1   0   76.89    3.20
  -1  -1   0   71.19    2.50
   1  -1   0   74.09    3.00
   1   1   0   74.09    3.10
  -1   1   0   77.19    2.80
   2  -1   0    8.50    1.90
  -2  -1   0    6.60    1.80
  -2   1   0    9.10    1.70
   2   1   0   10.70    2.20
   3  -1   0   17.30    3.40
  -3  -1   0   24.70    3.60
   3   1   0   21.60    3.70
  -3   1   0   19.80    3.30
   4  -1   0   61.09    5.90
  -4  -1   0   63.99    4.60
  -4  -1   0   68.39    6.20
   4   1   0   56.09    6.40
  -4   1   0   65.39    5.80
  -5  -1   0   18.00    5.10
   5  -1   0   14.00    5.10
  -5  -1   0   13.60    3.40
  -5   1   0    5.80    4.30
   5   1   0   15.40    5.10
   6  -1   0   70.09    9.80
  -6  -1   0   79.29    9.80
  -6  -1   0   64.89    6.70
  -6   1   0   81.79    9.50
   6   1   0   91.39   10.30
   7  -1   0   -4.60    8.10
  -7  -1   0    1.70    7.50
  -7  -1   0    6.00    4.60
  -7   1   0    5.40    5.80
  -7   1   0   12.70    5.20
   7   1   0    0.40    6.40
  -8  -1   0   -7.50    8.90
  -8  -1   0  -13.80    6.40
   8  -1   0   -0.20   11.60
   8   1   0   12.90   12.90
  -8   1   0    1.20    7.10
  -8   1   0   11.30   10.50
   0   2   0 1267.87   25.20
  -1  -2   0   42.00    2.70
  -1  -2   0   44.20    2.30
   1  -2   0   41.60    2.30
   1   2   0   41.00    2.20
  -1   2   0   43.10    2.20
   1   2   0   41.20    2.70
  -2  -2   0   34.80    2.90
  -2  -2   0   32.90    2.50
   2  -2   0   35.20    2.80
  -2   2   0   37.10    2.90
   2   2   0   40.00    3.60
   3  -2   0    6.50    2.60
  -3  -2   0   13.50    2.30
  -3  -2   0   12.20    3.10
   3   2   0   12.30    2.90
  -3   2   0   11.70    2.40
  -4  -2   0   23.50    4.20
   4  -2   0   23.00    4.60
  -4  -2   0   26.20    3.50
  -4   2   0   27.90    4.10
   4   2   0   31.00    4.90
  -5  -2   0    2.70    3.20
  -5  -2   0    4.20    3.00
   5  -2   0    5.10    3.20
  -5   2   0    9.10    4.30
   5   2   0    8.90    5.00
  -6  -2   0   41.20    5.70
   6  -2   0   42.80    8.00
  -6  -2   0   37.20    7.10
  -6   2   0   53.69    8.10
   6   2   0   29.80    7.60
  -7  -2   0    3.00    6.00
  -7  -2   0   10.40    5.30
   7  -2   0   15.80    8.60
  -7   2   0   12.80    5.00
   7   2   0   25.80   10.20
  -7   2   0    4.40    7.60
   8  -2   0   12.90   11.10
  -8  -2   0   -2.60    7.40
  -8  -2   0  -12.70    7.10
  -8   2   0   20.80    9.50
   8   2   0   -1.90    9.00
  -8   2   0   -6.60    6.20
   0  -3   0    1.30    1.00
   0  -3   0   -0.20    0.70
   0  -3   0    1.30    0.80
   0   3   0    0.00    0.60
  -1  -3   0 1107.69   23.20
   1  -3   0 1074.49   22.30
   1  -3   0 1087.79   22.90
  -1  -3   0 1110.09   23.90
   1   3   0 1097.79   23.10
  -1   3   0 1092.69   22.40
  -1   3   0 1117.49   22.90
   1   3   0 1095.79   23.90
  -2  -3   0   19.10    2.30
   2  -3   0   18.00    2.60
  -2  -3   0   21.30    3.20
   2   3   0   16.80    1.90
  -2   3   0   14.80    1.90
   2   3   0   18.40    2.80
   3  -3   0   44.30    4.00
  -3  -3   0   41.50    4.00
  -3  -3   0   48.90    3.70
   3   3   0   42.00    4.90
  -3   3   0   46.90    4.10
  -4  -3   0   -0.90    2.30
  -4  -3   0    0.30    3.10
   4  -3   0    1.50    3.00
  -4   3   0   -1.00    2.80
   4   3   0    1.30    3.70
   5  -3   0    3.70    4.30
  -5  -3   0    7.30    4.30
  -5  -3   0    7.60    3.10
   5   3   0    7.30    5.50
  -5   3   0    0.60    4.00
  -6  -3   0    0.60    5.90
   6  -3   0   23.50    6.50
  -6  -3   0   11.10    4.20
   6   3   0   10.50    5.30
  -6   3   0   11.20    4.50
  -7  -3   0   48.90    7.20
  -7  -3   0   57.49    9.30
   7  -3   0   47.00    8.80
   7   3   0   43.50    8.90
  -7   3   0   40.30    7.90
   0  -4   0  111.69    4.10
   0  -4   0  109.09    4.50
   0  -4   0  110.99    3.70
   0   4   0  103.79    3.90
   1  -4   0 3728.63   73.49
  -1  -4   0 3735.13   74.69
  -1  -4   0 3717.43   73.99
   1  -4   0 3834.92   76.09
  -1   4   0 3781.42   73.19
   1   4   0 3765.42   73.99
   1   4   0 3651.53   74.69
  -1   4   0 3826.52   73.49
  -2  -4   0  529.15   13.50
  -2  -4   0  529.45   14.70
   2  -4   0  559.54   13.90
   2   4   0  505.95   14.60
   2   4   0  535.85   13.50
  -2   4   0  526.35   12.30
  -2   4   0  540.25   13.60
  -3  -4   0    0.90    2.50
  -3  -4   0   -1.60    1.60
   3  -4   0   -2.20    2.10
  -3   4   0   -0.80    1.80
   3   4   0   -2.40    2.50
  -4  -4   0   48.90    6.20
   4  -4   0   50.39    5.90
  -4  -4   0   56.89    4.90
  -4   4   0   57.99    4.80
   4   4   0   65.59    6.00
  -5  -4   0   88.29    6.60
  -5  -4   0   90.39    8.30
   5  -4   0   91.69    8.30
  -5   4   0   98.19    7.70
   5   4   0   70.09    8.90
  -6  -4   0   29.50    7.50
   6  -4   0   26.20    7.10
  -6  -4   0   30.70    5.70
   6   4   0   21.40    6.00
  -6   4   0   26.70    5.80
  -7  -4   0   28.50    8.90
  -7  -4   0   31.40    6.20
   7  -4   0   21.60    7.50
   7   4   0   17.80    9.60
  -7   4   0   17.80    8.10
   0  -5   0    1.90    1.10
   0  -5   0    0.70    1.40
   0  -5   0   -0.40    1.60
   0   5   0    0.10    1.20
   1  -5   0  538.05   12.70
  -1  -5   0  533.95   14.10
   1  -5   0  539.85   12.90
  -1  -5   0  527.35   13.30
  -1   5   0  538.15   12.80
  -1   5   0  540.25   12.70
   1   5   0  544.05   13.50
   1   5   0  530.85   14.20
   2  -5   0  183.78    6.80
  -2  -5   0  180.48    7.50
  -2  -5   0  180.88    6.90
   2   5   0  174.58    7.90
  -2   5   0  178.88    6.50
  -2   5   0  183.68    5.80
   2   5   0  188.08    6.90
  -3  -5   0   63.39    4.30
  -3  -5   0   72.19    6.00
   3  -5   0   65.49    5.10
   3   5   0   65.59    6.00
  -3   5   0   60.39    4.50
   3   5   0   58.99    4.00
  -3   5   0   64.59    3.50
  -4  -5   0    1.30    2.60
   4  -5   0    2.40    2.70
  -4  -5   0    7.90    2.90
   4   5   0    3.70    4.00
  -4   5   0    4.80    2.80
  -5  -5   0    6.10    3.60
   5  -5   0    1.10    4.40
  -5  -5   0    6.10    4.70
   5   5   0    2.80    5.00
  -5   5   0    4.80    3.60
   6  -5   0   45.30    8.40
  -6  -5   0   44.00    7.30
  -6  -5   0   52.69    6.80
   6   5   0   54.59    9.20
  -6   5   0   42.40    7.30
  -7  -5   0   28.60    9.50
   7  -5   0   19.60    8.90
   7   5   0    5.70    7.20
  -7   5   0   30.50    7.60
   0  -6   0   49.80    3.80
   0  -6   0   52.49    3.20
   0  -6   0   52.09    3.00
   0   6   0   52.29    3.20
  -1  -6   0    7.80    2.50
   1  -6   0    4.60    1.60
   1  -6   0    6.90    1.70
  -1  -6   0    6.00    1.70
   1   6   0    4.10    1.50
  -1   6   0    6.60    1.70
   1   6   0    6.60    2.50
  -1   6   0    6.80    1.70
  -2  -6   0   77.79    5.40
  -2  -6   0   73.89    4.90
   2  -6   0   78.39    4.50
   2   6   0   74.19    4.70
  -2   6   0   72.59    3.80
  -2   6   0   79.49    4.40
   2   6   0   75.99    5.70
  -3  -6   0   84.29    5.20
   3  -6   0   88.39    5.90
  -3  -6   0   85.89    6.70
   3   6   0   91.79    5.70
  -3   6   0   89.09    4.40
  -3   6   0   89.49    5.50
   3   6   0   82.59    6.30
   4  -6   0   73.29    6.80
  -4  -6   0   77.39    7.50
  -4  -6   0   72.29    6.10
  -4   6   0   67.79    5.10
  -4   6   0   67.59    4.10
   4   6   0   60.49    7.20
   5  -6   0  132.59    8.80
  -5  -6   0  147.09    9.80
  -5  -6   0  142.99    9.00
   5   6   0  144.49   11.50
  -5   6   0  153.18    8.60
  -6  -6   0   -4.30    4.50
   6  -6   0    5.60    4.60
  -6  -6   0   -4.60    4.20
   6   6   0   -2.50    7.10
  -6   6   0    2.30    4.90
  -7  -6   0   -8.60    7.90
   7  -6   0   -8.10    7.60
  -7  -6   0   -7.30    5.70
   7   6   0  -12.50   10.20
  -7   6   0   15.90    6.90
   0  -7   0    5.50    2.10
   0  -7   0    6.90    2.00
   0  -7   0    7.80    1.70
   0   7   0    5.00    1.90
  -1  -7   0  102.29    5.90
   1  -7   0   94.09    4.60
  -1  -7   0   91.29    5.20
   1  -7   0   93.39    4.50
   1   7   0   93.49    4.90
   1   7   0   94.19    5.80
  -1   7   0   95.09    4.70
  -1   7   0   96.29    4.40
   2  -7   0  633.14   16.50
  -2  -7   0  631.84   17.10
  -2  -7   0  644.64   18.20
  -2   7   0  639.04   15.80
  -2   7   0  653.33   16.40
   2   7   0  633.04   17.00
   2   7   0  633.54   18.40
  -3  -7   0    3.60    2.20
   3  -7   0    2.20    2.20
  -3  -7   0    7.70    3.70
  -3   7   0    8.80    2.80
   3   7   0    1.70    2.60
  -3   7   0   10.30    2.10
   3   7   0    7.80    3.90
  -4  -7   0   33.40    5.50
   4  -7   0   27.40    4.80
  -4  -7   0   33.00    4.90
  -4   7   0   36.40    5.20
   4   7   0   25.50    5.50
  -4   7   0   29.40    3.50
  -5  -7   0   -2.30    2.60
   5  -7   0    1.20    4.80
  -5  -7   0    6.40    5.00
  -5   7   0    1.20    2.60
  -5   7   0   -2.60    3.20
   5   7   0   -2.10    5.90
  -6  -7   0    4.30    4.50
   6  -7   0    9.80    5.40
  -6  -7   0    6.00    5.00
   6   7   0   10.30    7.40
  -6   7   0    2.10    5.80
  -6   7   0    2.90    3.40
   7  -7   0   -4.10    6.40
  -7  -7   0    4.30    6.00
  -7  -7   0    5.20    8.30
  -7   7   0    2.30    8.00
  -7   7   0   -2.70    4.20
   7   7   0    6.20   10.10
   0  -8   0   49.00    4.70
   0  -8   0   56.99    3.70
   0  -8   0   60.79    4.40
   0   8   0   57.09    4.40
   1  -8   0    5.40    2.10
   1  -8   0    5.50    2.10
  -1  -8   0   -0.30    1.60
  -1  -8   0    1.00    2.40
   1   8   0    5.00    2.80
  -1   8   0    5.30    1.80
   1   8   0    3.30    1.90
  -1   8   0    3.10    1.60
   2  -8   0   67.69    4.10
   2  -8   0   54.19    4.10
  -2  -8   0   68.09    5.90
  -2  -8   0   59.49    4.60
  -2   8   0   57.39    4.00
   2   8   0   44.80    5.70
   2   8   0   60.89    4.60
  -2   8   0   63.99    4.30
   3  -8   0    6.60    3.00
  -3  -8   0    5.40    3.20
  -3  -8   0    4.40    3.10
   3   8   0    4.40    2.80
  -3   8   0    4.70    2.50
  -3   8   0    6.90    2.10
   3   8   0   -3.00    3.80
  -4  -8   0   89.69    8.60
   4  -8   0   92.09    7.60
  -4  -8   0   82.29    6.10
   4   8   0   83.29    9.20
  -4   8   0  101.19    7.30
  -4   8   0   92.79    5.80
   5  -8   0    2.10    5.10
  -5  -8   0    1.00    4.20
  -5  -8   0   10.50    6.10
  -5   8   0    6.10    3.60
  -5   8   0   -1.10    2.80
   5   8   0   14.10    7.30
  -6  -8   0    2.10    5.40
  -6  -8   0   -3.60    5.10
   6  -8   0    6.00    6.30
  -6   8   0   11.70    5.80
  -6   8   0    0.60    3.60
   6   8   0   12.40    6.90
   7  -8   0   16.20    8.90
  -7  -8   0   22.70    7.10
  -7  -8   0    6.60    6.50
   7   8   0   12.30   12.10
  -7   8   0   10.70    6.70
  -7   8   0    6.80    4.70
   0  -9   0   -2.60    1.60
   0  -9   0    0.80    1.80
   0  -9   0    0.10    2.80
   0   9   0    1.20    1.70
   1  -9   0  106.19    5.50
  -1  -9   0  101.09    5.70
   1  -9   0  105.19    5.60
  -1  -9   0  109.09    6.90
   1   9   0  100.79    5.80
  -1   9   0  109.49    5.40
  -1   9   0  102.19    5.70
   1   9   0  102.59    7.00
   2  -9   0   20.70    2.90
  -2  -9   0   17.00    3.90
  -2  -9   0   19.50    4.20
   2  -9   0   17.50    3.10
   2   9   0   29.10    5.20
   2   9   0   20.90    3.70
  -2   9   0   21.10    3.40
  -2   9   0   23.30    3.40
  -3  -9   0    4.80    3.20
   3  -9   0    8.00    3.30
  -3  -9   0    4.10    2.60
   3   9   0    4.70    2.50
  -3   9   0    3.70    2.70
  -3   9   0    5.40    2.30
   3   9   0    2.00    4.10
   4  -9   0   80.49    7.60
  -4  -9   0   70.29    7.70
  -4  -9   0   67.29    7.40
  -4   9   0   58.59    5.80
   4   9   0   60.09    5.60
   4   9   0   60.39    9.00
  -4   9   0   76.79    5.80
  -5  -9   0    0.80    3.60
   5  -9   0    1.60    4.60
  -5  -9   0   10.30    5.20
  -5   9   0    4.40    4.40
  -5   9   0   -1.60    3.20
   5   9   0   -5.30    6.40
  -6  -9   0    0.80    4.60
  -6  -9   0   -2.40    7.30
   6  -9   0   12.70    7.20
  -6   9   0    6.30    4.90
  -6   9   0    8.70    4.20
   6   9   0   16.10    9.90
  -7  -9   0   21.30    9.20
   7  -9   0   -2.20    9.70
  -7  -9   0   27.40    8.60
   7   9   0    9.80   13.40
  -7   9   0   -7.20    8.30
  -7   9   0    9.00    5.20
   0 -10   0    1.40    2.60
   0 -10   0    4.40    2.30
   0 -10   0    2.10    3.40
   0  10   0    6.80    2.90
   1 -10   0  198.38    7.80
   1 -10   0  199.28    8.20
  -1 -10   0  190.98    9.60
  -1 -10   0  188.08    8.40
   1  10   0  188.18    8.40
  -1  10   0  200.08    7.70
  -1  10   0  197.78    8.40
   2 -10   0   50.19    4.30
  -2 -10   0   55.69    5.80
   2 -10   0   64.49    5.10
  -2 -10   0   51.69    6.10
  -2  10   0   59.89    4.90
   2  10   0   43.20    5.40
  -2  10   0   48.90    4.70
   2  10   0   63.49    7.00
   3 -10   0    8.60    3.30
  -3 -10   0    8.20    4.90
  -3 -10   0    4.00    3.70
  -3  10   0    9.30    3.20
  -3  10   0    4.50    3.10
   3  10   0    7.90    3.70
   3  10   0    7.20    4.40
  -4 -10   0  197.58   10.40
  -4 -10   0  224.58   12.90
   4 -10   0  210.28   11.10
  -4  10   0  207.08   10.40
  -4  10   0  213.98    9.10
   4  10   0  209.28   10.90
   4  10   0  210.78   13.60
   5 -10   0   10.10    4.50
  -5 -10   0    8.20    5.70
  -5 -10   0   20.10    7.00
  -5  10   0   15.40    5.00
  -5  10   0    7.20    3.50
   5  10   0    8.80    7.90
  -6 -10   0  -10.10    6.10
  -6 -10   0   -1.70    8.00
   6 -10   0    2.60    7.50
  -6  10   0   -0.10    4.30
   6  10   0    2.50   10.20
  -6  10   0   -3.00    6.10
   0 -11   0   -1.60    2.00
   0 -11   0   -3.00    2.70
   0 -11   0   -4.40    2.80
   0  11   0    4.70    2.90
  -1 -11   0    5.60    2.50
  -1 -11   0   -3.30    3.20
   1 -11   0    2.00    2.40
  -1 -11   0   -0.50    2.40
   1 -11   0    1.70    2.50
   1  11   0    5.90    3.30
  -1  11   0   -2.10    2.70
  -2 -11   0    5.80    3.90
   2 -11   0    4.20    3.00
   2 -11   0   -0.50    2.10
  -2 -11   0    5.70    2.50
  -2  11   0    1.80    2.50
  -2  11   0   -1.80    2.10
   2  11   0   -2.80    2.90
   2  11   0    2.70    4.80
  -3 -11   0  105.19    8.20
  -3 -11   0  106.79    9.00
   3 -11   0   91.59    7.40
  -3  11   0  111.39    7.30
   3  11   0  101.79    9.40
   3  11   0  106.29    7.30
  -3  11   0  114.29    7.40
  -4 -11   0    1.00    4.60
   4 -11   0   -2.70    4.10
  -4 -11   0    5.40    6.00
  -4  11   0   -1.00    3.30
  -4  11   0    3.80    4.10
   4  11   0   -1.60    4.20
   4  11   0    9.00    6.50
  -5 -11   0   14.20    7.60
  -5 -11   0   11.00    6.00
   5 -11   0   -2.20    6.00
   5  11   0    4.70    9.10
  -5  11   0    6.00    4.20
  -5  11   0   -1.30    4.00
  -6 -11   0   11.70    7.70
  -6 -11   0   20.90    7.50
   6 -11   0   14.40    7.10
   6  11   0   22.30   11.10
  -6  11   0    8.10    7.60
  -6  11   0   10.50    5.40
   0 -12   0   30.10    4.30
   0 -12   0   25.30    4.00
   0 -12   0   25.50    5.50
   0  12   0   22.70    3.90
  -1 -12   0   -3.60    2.20
   1 -12   0    5.70    3.00
  -1 -12   0   -2.50    2.50
   1 -12   0   -1.60    2.00
  -1 -12   0   -3.80    4.00
  -1  12   0    3.20    3.20
   1  12   0    5.00    3.20
  -2 -12   0    1.60    4.10
   2 -12   0    5.10    2.90
   2 -12   0   11.20    3.40
  -2 -12   0    6.90    3.00
   2  12   0    5.30    3.70
   2  12   0    5.90    5.10
  -2  12   0   -0.20    3.10
  -2  12   0    6.90    3.30
   3 -12   0   13.50    4.60
  -3 -12   0   22.10    6.00
  -3 -12   0   26.90    4.70
   3  12   0   30.40    6.90
  -3  12   0   18.70    4.10
   3  12   0   20.80    4.50
  -3  12   0   16.30    4.50
  -4 -12   0   33.30    8.00
  -4 -12   0   31.50    6.90
   4 -12   0   32.10    6.70
   4  12   0   33.30    6.80
   4  12   0   17.70    7.80
  -4  12   0   26.20    5.60
  -4  12   0   39.00    5.50
  -5 -12   0    1.50    6.90
   5 -12   0   14.70    6.80
  -5 -12   0    1.00    6.20
   5  12   0    0.10    8.60
  -5  12   0    2.00    5.00
  -5  12   0   -5.60    4.40
  -6 -12   0   -2.60    8.40
   6 -12   0   -6.90    9.40
  -6 -12   0   -5.20    9.00
  -6  12   0   -0.30    7.50
   6  12   0    5.40   12.60
  -6  12   0   -1.90    5.50
   0 -13   0   -0.30    3.80
   0 -13   0    1.30    3.10
   0 -13   0    0.90    3.30
   0  13   0    3.00    2.60
   1 -13   0    2.70    3.20
  -1 -13   0    7.50    3.30
   1 -13   0   -1.20    4.60
   1 -13   0    1.20    3.30
  -1 -13   0    2.60    2.80
  -1 -13   0   -4.00    4.50
  -1  13   0    0.10    3.60
   1  13   0    3.60    2.90
  -2 -13   0    6.50    5.00
  -2 -13   0    4.80    4.80
   2 -13   0    4.00    3.10
   2 -13   0    4.80    3.70
  -2  13   0   -1.70    3.20
   2  13   0   -2.00    4.10
  -2  13   0    6.10    3.60
   3 -13   0   47.00    6.40
  -3 -13   0   41.10    6.00
  -3 -13   0   43.40    7.40
   3  13   0   57.39    9.10
  -3  13   0   61.79    6.60
  -3  13   0   61.39    6.80
   3  13   0   44.30    6.30
   4 -13   0    8.60    6.00
  -4 -13   0   -3.80    5.30
  -4 -13   0   -1.70    6.70
   4  13   0   18.50    8.20
  -4  13   0    2.60    4.90
   4  13   0   -0.30    5.30
  -4  13   0    0.70    4.20
  -5 -13   0    2.20    5.60
   5 -13   0   -4.50    6.80
  -5 -13   0   15.70    9.50
  -5  13   0    2.70    5.70
   5  13   0    2.20    9.00
  -5  13   0   14.30    5.80
   0 -14   0  217.98   10.90
   0 -14   0  230.88   12.50
   0 -14   0  236.58   10.20
   0  14   0  230.68   11.60
   1 -14   0    8.90    5.30
   1 -14   0    2.50    3.80
  -1 -14   0   -0.70    3.40
   1 -14   0   -0.40    3.60
  -1 -14   0    9.50    5.40
  -1 -14   0   -2.30    3.20
   1  14   0   -0.70    4.20
  -1  14   0    2.20    4.20
  -2 -14   0    5.60    5.50
   2 -14   0    3.60    4.00
   2 -14   0    3.30    3.70
  -2 -14   0    0.50    3.80
  -2 -14   0   -9.30    4.30
   2  14   0    2.20    4.50
  -2  14   0    4.40    3.80
  -3 -14   0   27.20    6.40
  -3 -14   0   27.40    7.50
   3 -14   0   30.40    6.10
   3  14   0   13.00    4.90
   3  14   0   23.60    8.50
  -3  14   0   20.20    5.10
  -3  14   0   16.50    5.40
  -4 -14   0    3.30    4.90
   4 -14   0   14.20    5.60
  -4 -14   0   -3.70    7.20
   4  14   0   -4.10    4.40
  -4  14   0   -2.20    4.50
   4  14   0   16.40    9.90
  -4  14   0    9.80    5.20
   5 -14   0    1.60    7.30
  -5 -14   0   -8.40    8.70
  -5 -14   0   -2.80    5.80
  -5  14   0    1.70    5.60
   5  14   0    1.50   10.50
  -5  14   0  -11.60    7.00
   0 -15   0    2.50    3.90
   0 -15   0    3.80    5.40
   0 -15   0   -2.50    3.80
   0  15   0    5.80    4.80
  -1 -15   0   -3.10    3.60
  -1 -15   0   -7.90    5.50
  -1 -15   0   -7.90    3.70
   1 -15   0   -1.40    4.00
   1 -15   0    2.40    3.90
   1 -15   0    2.10    6.10
   1  15   0   -0.50    3.70
  -1  15   0   -0.70    4.30
   2 -15   0   -1.50    4.30
  -2 -15   0   12.90    6.00
  -2 -15   0   13.70    6.80
  -2 -15   0   14.10    5.30
   2 -15   0   10.60    4.20
  -2  15   0    7.00    5.10
   2  15   0   14.20    5.10
  -3 -15   0    8.70    6.60
  -3 -15   0    8.80    6.80
   3 -15   0   -2.20    4.60
   3  15   0    6.30    8.40
  -3  15   0   -6.00    4.60
   3  15   0    4.50    5.00
  -3  15   0    3.60    5.30
  -4 -15   0    1.70    7.70
  -4 -15   0   -3.70    4.90
   4 -15   0   -8.20    6.20
  -4  15   0   13.40    5.90
   4  15   0    4.10    9.80
  -4  15   0   -1.40    5.40
   4  15   0   -1.30    5.20
   5 -15   0   -5.20    8.50
  -5 -15   0   10.60    9.50
  -5 -15   0   -4.50    8.20
   5  15   0    2.30   13.80
  -5  15   0   -0.40    7.90
  -5  15   0    7.90    6.20
   0 -16   0   11.00    6.70
   0 -16   0    8.40    4.90
   0 -16   0   11.30    4.50
   0  16   0    8.10    4.60
  -1 -16   0   -0.50    4.80
   1 -16   0    4.20    4.90
   1 -16   0   13.30    7.30
  -1 -16   0    3.40    6.90
  -1 -16   0   -0.70    5.10
   1 -16   0   -8.10    4.10
  -1  16   0   -0.90    5.10
   1  16   0   -2.90    5.50
   2 -16   0    3.50    4.90
  -2 -16   0    6.00    6.50
  -2 -16   0    6.00    5.00
   2 -16   0    2.80    4.10
  -2 -16   0   -5.80    7.00
   2 -16   0    6.70    7.50
  -2  16   0    1.10    5.60
   2  16   0   -6.80    5.90
  -3 -16   0   10.60    7.70
   3 -16   0   14.80    6.10
  -3 -16   0   27.50    8.20
  -3  16   0   -5.00    5.20
   3  16   0    1.70    6.20
  -3  16   0   14.30    6.30
   4 -16   0   -1.90    7.70
  -4 -16   0   -3.20    6.30
  -4 -16   0   -6.60    9.20
   4  16   0    0.50   11.40
   4  16   0   -6.20    5.50
  -4  16   0   -1.70    6.70
  -4  16   0    4.60    6.50
   0 -17   0   -3.20    4.80
   0 -17   0   -3.70    6.00
   0 -17   0   20.20    8.10
   0  17   0    6.10    6.30
  -1 -17   0    8.00    5.80
   1 -17   0   17.00    6.20
  -1 -17   0   27.70    8.60
  -1 -17   0    4.30    6.80
   1 -17   0   11.90    8.00
   1 -17   0    8.30    5.20
  -1  17   0    3.90    6.00
   1  17   0   10.00    5.10
  -2 -17   0    2.80    8.10
   2 -17   0   -1.40    8.60
   2 -17   0    2.30    5.10
  -2 -17   0    2.20    7.10
   2 -17   0    5.40    6.10
  -2 -17   0    2.20    5.70
  -2  17   0    0.30    5.80
   2  17   0    0.00    6.80
  -3 -17   0    7.00    8.00
  -3 -17   0   12.30    8.80
  -3 -17   0    6.80    6.20
   3 -17   0   -4.20    6.30
  -3  17   0   -7.50    6.40
   3  17   0   -4.90    7.20
   0 -18   0   -7.90    5.70
   0 -18   0   -7.20    8.40
   0 -18   0    9.50    7.30
   0  18   0    4.40    7.00
  -1 -18   0   10.90    8.20
   1 -18   0    8.00    8.70
  -1 -18   0    2.10    7.00
   1 -18   0   -7.70    5.80
  -1 -18   0    0.90    6.50
   1 -18   0   -2.60    6.00
  -1  18   0    5.80    6.90
   1  18   0    5.80    7.30
  -2 -18   0    5.50    9.00
  -2 -18   0   -3.20    8.20
   2 -18   0    8.70    6.80
   2 -18   0   11.60    9.80
   2 -18   0    5.70    6.10
  -2 -18   0    7.50    6.70
  -2  18   0    5.20    6.70
   2  18   0  -13.90    6.80
   0 -19   0    7.10   10.20
   0 -19   0   -1.90    6.70
   0 -19   0   10.40    6.40
   0  19   0  -11.10    7.30
   1 -19   0   12.60    7.70
  -1 -19   0   10.70    8.80
  -1 -19   0   -2.60   10.10
  -1 -19   0   -4.20    7.10
   1 -19   0    6.00    7.90
   1 -19   0    4.70    9.70
  -1  19   0  -12.30    7.60
   1  19   0   -8.40    7.90
  -8   0   1   17.60   10.10
   8   0  -1   -9.90   10.50
  -8   0   1  -11.80    7.00
   7   0  -1   29.20    9.30
  -7   0   1   46.50    6.70
  -7   0   1   38.90    7.80
   6   0  -1   -5.10    5.70
  -6   0   1    7.60    5.50
   5   0  -1    2.40    3.80
  -5   0   1   -5.00    3.10
  -4   0   1   -3.50    1.80
   4   0  -1   -1.00    2.60
   3   0  -1  495.55   14.70
  -3   0   1  546.05   14.90
   2   0  -1    1.50    1.40
  -2   0   1    0.10    1.20
  -1   0   1   11.60    1.30
   1   0  -1   11.50    1.40
  -1   0  -1 1532.55   31.10
  -1   0  -1 1515.75   30.70
   1   0   1 1525.05   31.10
  -2   0  -1   -0.50    0.70
   2   0   1   -1.20    1.60
  -2   0  -1    0.50    1.10
   3   0   1  898.81   22.80
  -3   0  -1  867.41   22.20
  -3   0  -1  890.61   19.50
  -4   0  -1    3.30    2.20
   4   0   1    2.80    3.50
  -4   0  -1    0.30    1.70
  -5   0  -1   31.50    5.60
   5   0   1   33.40    6.50
  -5   0  -1   27.40    3.60
  -6   0  -1    7.20    4.30
   6   0   1    8.10    5.10
  -6   0  -1    0.40    3.10
  -7   0  -1    9.10    4.70
   7   0   1   28.10    9.40
  -7   0  -1   -4.50    7.40
  -8  -1   1  -13.20    8.50
   8  -1  -1    3.30    9.20
  -8  -1   1    7.70    7.10
   8   1  -1   10.80   12.50
  -8   1   1   -4.40    6.50
  -8   1   1    3.80    9.40
  -7  -1   1   59.09   10.00
   7  -1  -1   43.00    8.90
  -7  -1   1   58.59    7.30
  -7   1   1   60.49    7.20
  -7   1   1   56.79    9.50
   7   1  -1   55.79    9.90
   6  -1  -1    2.00    4.20
  -6  -1   1    2.30    3.90
  -6  -1   1    9.00    4.20
   6   1  -1    3.70    5.80
  -6   1   1    3.80    4.20
  -5  -1   1   -1.70    4.20
   5  -1  -1    5.70    3.10
  -5   1   1    4.90    3.00
   5   1  -1    3.40    4.50
   4  -1  -1   80.49    6.60
  -4  -1   1   82.99    5.90
  -4   1   1   80.69    6.20
   4   1  -1   80.69    6.70
  -3  -1   1  160.68    7.30
   3  -1  -1  161.98    7.10
  -3   1   1  156.08    7.00
   3   1  -1  148.99    6.90
   2  -1  -1  301.47    9.00
  -2  -1   1  317.37    9.20
  -2   1   1  324.07    9.10
   2   1  -1  325.07    9.40
   1  -1  -1  196.28    5.30
  -1  -1   1  192.88    5.30
  -1   1   1  196.28    5.30
   1   1  -1  183.88    5.30
   0  -1  -1   49.60    2.30
  -1  -1  -1  131.69    3.60
   1  -1   1  121.39    4.20
  -1  -1  -1  132.99    4.80
   1   1   1  126.09    4.70
   1   1   1  128.29    3.60
  -1   1  -1  128.79    4.10
  -2  -1  -1  120.09    5.50
  -2  -1  -1  111.39    3.90
   2  -1   1  115.79    5.00
   2   1   1  111.89    5.30
  -2   1  -1  116.49    5.00
   3  -1   1   42.70    4.70
  -3  -1  -1   43.40    4.00
  -3  -1  -1   46.70    3.10
  -3   1  -1   44.10    3.90
   3   1   1   44.70    4.90
  -4  -1  -1   38.60    5.30
   4  -1   1   34.90    5.50
  -4  -1  -1   30.20    3.60
   4   1   1   38.80    5.70
  -4   1  -1   42.20    5.30
   5  -1   1   -0.90    4.40
  -5  -1  -1    0.00    3.20
  -5  -1  -1    5.60    2.80
   5   1   1    7.80    4.70
  -5   1  -1    2.40    3.20
  -5   1  -1    3.00    2.50
   6  -1   1  213.38   14.20
  -6  -1  -1  232.18   10.10
  -6  -1  -1  241.18   13.90
   6   1   1  215.98   14.50
  -6   1  -1  220.18    9.30
  -6   1  -1  236.78   13.50
  -7  -1  -1    0.90    4.90
   7  -1   1   -7.10    6.10
  -7  -1  -1    7.60    7.60
  -7   1  -1   -7.20    4.60
  -7   1  -1    6.70    5.70
   7   1   1    9.90    9.30
  -8  -2   1    3.70    7.30
   8  -2  -1  -12.20    8.00
  -8  -2   1   -5.70    7.50
  -8   2   1    4.20    6.90
   8   2  -1   -0.60   12.10
  -8   2   1   -0.80    8.90
  -7  -2   1   60.39   10.10
   7  -2  -1   63.29   10.80
  -7  -2   1   63.99    7.80
   7   2  -1   60.09   11.60
  -7   2   1   66.69    9.70
  -6  -2   1  256.17   14.00
  -6  -2   1  242.68   11.00
   6  -2  -1  220.48   13.80
  -6   2   1  246.88   13.20
  -5  -2   1    1.10    2.80
   5  -2  -1    4.40    3.30
  -5  -2   1    2.90    3.80
  -5   2   1    3.70    3.10
   5   2  -1    2.70    4.40
  -4  -2   1    8.50    3.50
   4  -2  -1   10.20    3.00
  -4  -2   1    8.30    2.80
  -4   2   1   16.80    3.30
   4   2  -1   10.30    3.30
  -3  -2   1    0.30    1.10
   3  -2  -1    1.40    2.30
  -3  -2   1    1.20    1.90
  -3   2   1    4.70    2.00
   3   2  -1   -2.80    2.20
  -2  -2   1  117.49    5.10
  -2  -2   1  112.09    4.40
   2  -2  -1  108.09    4.80
  -2   2   1  114.59    4.80
   2   2  -1  116.29    5.30
   1  -2  -1  205.18    5.70
  -1  -2   1  193.38    5.60
  -1  -2   1  191.78    5.60
  -1   2   1  201.18    5.60
   1   2  -1  195.98    5.70
   0  -2  -1  394.96    8.90
   0  -2   1  398.46    8.60
   0  -2  -1  391.66    8.90
   0  -2  -1  400.76    9.60
   0   2  -1  398.36    8.60
   0   2   1  405.86    8.90
  -1  -2  -1  495.05   11.10
  -1  -2  -1  503.15   12.30
   1  -2   1  493.75   11.20
   1   2   1  480.95   12.20
   1   2   1  486.15   11.00
  -1   2  -1  501.05   11.10
  -1   2  -1  468.15   10.00
   2  -2   1   38.70    2.90
  -2  -2  -1   39.20    2.60
  -2  -2  -1   38.30    3.30
   2   2   1   38.90    3.30
  -2   2  -1   38.80    3.00
   2   2   1   41.20    2.50
  -3  -2  -1  409.76   10.80
   3  -2   1  385.66   12.50
  -3  -2  -1  390.66   12.80
  -3   2  -1  396.26   12.30
   3   2   1  386.46   13.20
  -4  -2  -1   20.40    3.00
   4  -2   1   22.60    4.20
  -4  -2  -1   18.40    4.20
   4   2   1   15.70    4.10
  -4   2  -1   20.10    3.80
   5  -2   1   28.40    5.40
  -5  -2  -1   30.80    6.10
  -5  -2  -1   39.00    4.70
   5   2   1   26.90    6.30
  -5   2  -1   31.10    5.30
  -6  -2  -1   -4.30    5.60
  -6  -2  -1   -6.70    3.50
   6  -2   1   -0.90    4.70
   6   2   1    1.70    4.80
  -6   2  -1   -3.40    4.90
  -6   2  -1    6.50    3.40
   7  -2   1   10.20    9.10
  -7  -2  -1    8.30    6.20
  -7  -2  -1    5.30    4.80
   7   2   1   -5.30    6.40
  -7   2  -1    1.30    8.20
  -7   2  -1    0.50    4.50
  -8  -3   1   11.90    7.60
  -8  -3   1   -3.20    7.00
   8  -3  -1   -7.40   10.90
  -8   3   1    5.30    7.10
  -8   3   1   -0.50    6.40
   8   3  -1    6.70    8.40
  -7  -3   1   21.60    6.50
   7  -3  -1   19.70    8.30
  -7  -3   1   24.40    5.60
   7   3  -1   15.90    8.30
  -7   3   1   33.00    6.80
  -6  -3   1   17.90    5.30
   6  -3  -1   12.50    5.00
  -6  -3   1   19.20    4.90
  -6   3   1   22.60    6.00
   6   3  -1   29.60    7.80
   5  -3  -1   67.09    7.60
  -5  -3   1   77.29    7.10
  -5  -3   1   68.39    6.20
  -5   3   1   84.29    6.70
   5   3  -1   68.19    7.10
  -4  -3   1   13.20    2.90
   4  -3  -1    6.80    2.90
  -4  -3   1    7.40    3.20
   4   3  -1    9.90    4.00
  -4   3   1    7.70    3.10
   3  -3  -1   73.19    4.80
  -3  -3   1   69.19    5.20
  -3  -3   1   72.39    4.50
  -3   3   1   70.49    4.40
   3   3  -1   67.29    5.40
  -2  -3   1   20.10    2.50
  -2  -3   1   24.30    2.80
   2  -3  -1   20.30    2.70
  -2   3   1   20.30    2.30
   2   3  -1   19.50    2.90
   1  -3  -1 1057.79   22.90
  -1  -3   1 1078.49   23.00
  -1  -3   1 1095.99   23.00
   1   3  -1 1072.39   23.10
  -1   3   1 1106.59   22.90
  -1   3   1 1100.29   22.60
   1   3  -1 1095.39   23.00
   0  -3   1  201.98    4.80
   0  -3  -1  199.28    6.30
   0  -3  -1  199.48    5.50
   0  -3   1  203.08    5.40
   0  -3  -1  199.88    5.70
   0   3  -1  212.28    5.40
   0   3   1  201.48    5.70
   1  -3   1 1299.17   27.00
  -1  -3  -1 1311.97   28.70
   1  -3   1 1276.57   26.10
  -1  -3  -1 1326.17   27.30
  -1   3  -1 1308.07   26.20
   1   3   1 1338.37   28.80
   1   3   1 1333.67   27.40
  -1   3  -1 1354.66   27.00
  -2  -3  -1   81.39    5.00
  -2  -3  -1   81.69    3.90
   2  -3   1   79.19    4.10
   2   3   1   72.29    4.90
  -2   3  -1   86.09    4.20
   2   3   1   79.19    3.60
   3  -3   1    2.70    2.20
  -3  -3  -1    7.20    3.20
  -3  -3  -1    5.70    1.90
  -3   3  -1    8.20    2.50
   3   3   1    4.70    3.10
   4  -3   1   38.50    4.70
  -4  -3  -1   47.20    6.00
  -4  -3  -1   48.60    4.30
  -4   3  -1   62.09    5.80
   4   3   1   46.90    6.70
  -5  -3  -1   11.00    4.60
   5  -3   1   14.90    5.40
  -5  -3  -1   15.50    3.70
   5   3   1    8.30    5.10
  -5   3  -1   10.80    3.80
   6  -3   1   27.50    7.70
  -6  -3  -1   31.90    7.90
  -6  -3  -1   35.60    5.50
  -6   3  -1   32.20    6.40
   6   3   1   35.00    7.80
  -7  -3  -1   -0.30    7.20
  -7  -3  -1    9.40    5.50
   7  -3   1    4.30    9.00
  -7   3  -1   13.40    5.00
   7   3   1   13.90    9.20
  -7   3  -1   13.10    6.20
  -7  -4   1   -2.00    5.30
   7  -4  -1   -8.80    7.80
  -7  -4   1   10.30    5.80
  -7   4   1  -16.50    6.00
   7   4  -1   -9.80    8.30
   6  -4  -1   38.80    7.80
  -6  -4   1   35.60    7.70
  -6  -4   1   44.00    6.40
  -6   4   1   44.60    7.10
   6   4  -1   40.10    8.40
  -5  -4   1   47.70    7.00
  -5  -4   1   47.30    5.90
   5  -4  -1   62.29    6.80
   5   4  -1   40.10    6.50
  -5   4   1   47.90    6.40
   4  -4  -1   17.20    4.00
  -4  -4   1   11.70    3.90
  -4  -4   1   17.90    3.10
  -4   4   1   17.10    3.20
   4   4  -1   18.00    4.10
  -3  -4   1    9.60    2.50
  -3  -4   1    9.20    2.50
   3  -4  -1    9.60    2.80
   3   4  -1    3.90    2.60
  -3   4   1    7.10    1.90
  -2  -4   1    6.50    1.60
  -2  -4   1    8.30    2.30
   2  -4  -1    8.50    2.20
   2   4  -1    8.60    2.50
   2   4  -1    8.80    1.80
  -2   4   1    6.70    1.90
   1  -4  -1 9455.55  194.68
  -1  -4   1 9676.23  191.68
   1  -4  -1 9767.32  190.48
  -1  -4   1 9664.03  196.48
   1   4  -1 9533.15  195.88
   1   4  -1 9619.94  196.38
  -1   4   1 9999.00  191.88
  -1   4   1 9609.74  195.58
   0  -4  -1  313.17    9.40
   0  -4   1  324.07    8.30
   0  -4   1  329.97    8.30
   0  -4   1  332.77    7.60
   0  -4  -1  321.17    8.40
   0  -4  -1  334.37    8.60
   0   4   1  331.47    8.70
   0   4  -1  339.47    8.40
   1  -4   1    0.10    0.90
  -1  -4  -1    3.00    1.10
  -1  -4  -1    0.40    1.20
   1  -4   1    2.00    0.90
  -1   4  -1    1.70    0.90
   1   4   1   -0.50    1.10
  -1   4  -1    3.30    1.00
   1   4   1    3.20    1.90
  -2  -4  -1   11.10    2.40
   2  -4   1    7.40    2.10
  -2  -4  -1    6.30    1.80
   2   4   1    7.50    2.60
   2   4   1    9.00    1.70
  -2   4  -1    7.80    1.20
  -2   4  -1    7.50    1.70
  -3  -4  -1    2.40    2.90
  -3  -4  -1    0.50    1.70
   3  -4   1   -0.70    2.30
   3   4   1    1.70    1.70
  -3   4  -1    0.60    1.80
   3   4   1    1.30    3.10
  -4  -4  -1   62.69    5.90
  -4  -4  -1   70.79    5.10
   4  -4   1   62.79    5.60
  -4   4  -1   83.19    6.10
   4   4   1   80.69    7.60
  -5  -4  -1    1.90    3.00
  -5  -4  -1    1.50    4.60
   5  -4   1    5.60    4.50
  -5   4  -1    2.30    3.70
   5   4   1    9.00    4.40
  -6  -4  -1    8.90    4.20
   6  -4   1   12.30    6.40
  -6  -4  -1   14.70    5.00
  -6   4  -1   10.10    5.90
   6   4   1    6.20    6.70
   7  -4   1   15.70    9.70
  -7  -4  -1    3.00    5.20
  -7  -4  -1   18.30    8.90
   7   4   1   -8.30    8.70
  -7   4  -1    7.30    4.70
  -7   4  -1    9.50    7.40
  -7  -5   1    5.00    5.70
  -7  -5   1   11.10    7.80
  -7   5   1   -2.20    5.90
   7   5  -1   18.30    7.10
  -6  -5   1    5.80    3.80
  -6  -5   1   -0.60    6.40
   6  -5  -1    9.30    6.50
  -6   5   1   -0.10    3.50
   6   5  -1    3.30    6.10
  -5  -5   1  109.79    8.70
   5  -5  -1  124.99    9.10
  -5  -5   1  134.99    7.90
   5   5  -1  103.09    9.10
  -5   5   1  107.59    7.90
  -4  -5   1   19.10    4.40
   4  -5  -1   26.50    4.80
  -4  -5   1   22.60    3.90
   4   5  -1   18.90    4.80
  -4   5   1   21.00    3.60
  -3  -5   1   70.19    4.50
  -3  -5   1   64.79    5.40
   3  -5  -1   58.29    5.00
  -3   5   1   65.99    4.80
   3   5  -1   59.49    5.60
   2  -5  -1   42.00    3.50
  -2  -5   1   48.00    4.00
  -2  -5   1   46.70    3.40
   2   5  -1   41.30    4.00
  -2   5   1   44.70    3.00
   2   5  -1   46.40    3.40
  -2   5   1   53.09    3.60
  -1  -5   1   41.10    2.90
  -1  -5   1   47.70    3.30
   1  -5  -1   41.80    2.80
   1  -5  -1   39.30    2.90
   1   5  -1   42.60    2.90
  -1   5   1   43.60    2.70
   1   5  -1   39.20    3.20
  -1   5   1   44.00    2.90
   0  -5   1  303.57    8.50
   0  -5  -1  295.47    8.30
   0  -5  -1  309.67    9.50
   0  -5  -1  303.27    8.60
   0  -5   1  306.77    7.60
   0  -5   1  301.87    8.30
   0   5   1  301.07    8.50
   0   5  -1  313.37    8.40
  -1  -5  -1  168.88    7.10
   1  -5   1  179.98    5.30
   1  -5   1  163.38    5.30
  -1  -5  -1  175.68    6.20
  -1   5  -1  172.38    5.30
   1   5   1  160.08    5.90
  -1   5  -1  167.78    5.30
   1   5   1  159.98    7.10
   2  -5   1   33.30    3.20
  -2  -5  -1   30.70    3.40
  -2  -5  -1   34.00    3.50
  -2   5  -1   31.50    2.90
   2   5   1   33.60    3.20
   2   5   1   35.50    4.60
  -2   5  -1   31.30    2.30
  -3  -5  -1   64.99    6.10
  -3  -5  -1   68.99    4.70
   3  -5   1   57.59    5.00
   3   5   1   52.79    5.40
  -3   5  -1   65.39    4.50
  -3   5  -1   71.99    3.40
   3   5   1   71.09    4.70
   4  -5   1  131.09    7.90
  -4  -5  -1  123.09    7.00
  -4  -5  -1  130.49    9.00
   4   5   1  130.89    8.60
  -4   5  -1  137.39    7.60
  -5  -5  -1  251.77   12.60
   5  -5   1  215.88   12.20
  -5  -5  -1  247.08   10.70
   5   5   1  198.18   12.20
  -5   5  -1  256.57   11.80
  -6  -5  -1   -1.80    4.10
   6  -5   1    0.10    4.30
  -6  -5  -1   -1.80    4.20
  -6   5  -1    2.30    5.50
   6   5   1    2.70    5.40
  -7  -5  -1    7.30    5.70
  -7  -5  -1   11.70    9.60
   7  -5   1   25.70   10.10
  -7   5  -1   17.90    7.50
   7   5   1   21.80   10.10
  -7  -6   1    6.90    7.70
  -7  -6   1  -10.50    5.90
   7  -6  -1    7.70    8.60
   7   6  -1  -18.50    9.50
  -7   6   1   10.40    6.80
  -6  -6   1    7.80    6.10
  -6  -6   1    7.30    5.00
   6  -6  -1    1.10    6.00
   6   6  -1   -5.40    6.30
  -6   6   1  -10.90    4.30
  -5  -6   1  206.78   11.90
  -5  -6   1  197.78   10.20
   5  -6  -1  181.18   10.30
  -5   6   1  202.98   10.60
   5   6  -1  177.18   12.10
  -4  -6   1    4.90    3.50
  -4  -6   1    4.70    3.20
   4  -6  -1    2.30    2.50
   4   6  -1    1.20    3.60
  -4   6   1    1.20    3.00
   3  -6  -1    0.00    1.80
  -3  -6   1   -1.00    1.50
  -3  -6   1   -1.80    2.40
   3   6  -1    5.40    3.20
  -3   6   1   -0.70    1.40
  -3   6   1   -0.60    2.30
   2  -6  -1   55.19    3.90
  -2  -6   1   43.20    4.20
  -2  -6   1   42.80    4.10
   2   6  -1   52.19    4.20
  -2   6   1   52.59    3.50
  -2   6   1   51.59    3.80
   2   6  -1   48.10    4.70
   1  -6  -1  177.18    6.20
   1  -6  -1  177.78    6.20
  -1  -6   1  167.68    6.60
  -1  -6   1  173.68    6.70
   1   6  -1  168.78    6.80
  -1   6   1  169.68    6.10
   1   6  -1  169.68    6.30
  -1   6   1  171.68    6.10
   0  -6  -1  428.36   11.60
   0  -6  -1  430.76   12.80
   0  -6  -1  428.26   11.30
   0  -6   1  440.36   11.40
   0  -6   1  434.26   11.70
   0  -6   1  432.36   10.50
   0   6   1  433.56   11.70
   0   6  -1  433.66   11.40
   1  -6   1  119.89    4.60
   1  -6   1  120.19    4.60
  -1  -6  -1  119.29    5.50
  -1  -6  -1  118.09    6.40
   1   6   1  118.09    5.20
  -1   6  -1  124.49    4.70
   1   6   1  108.59    6.20
  -1   6  -1  120.69    4.60
  -2  -6  -1    1.70    1.50
   2  -6   1    0.10    1.60
  -2  -6  -1    0.20    2.30
   2   6   1    0.40    1.80
   2   6   1   -0.60    2.00
  -2   6  -1    0.80    1.10
  -2   6  -1    1.80    1.60
   3  -6   1   43.90    4.70
  -3  -6  -1   39.90    4.80
  -3  -6  -1   38.70    3.80
   3   6   1   42.70    6.10
   3   6   1   43.10    4.30
  -3   6  -1   38.30    3.00
  -3   6  -1   36.50    4.00
   4  -6   1   50.29    6.50
  -4  -6  -1   52.59    5.30
  -4  -6  -1   64.99    7.40
  -4   6  -1   54.09    5.30
  -4   6  -1   59.69    3.80
   4   6   1   48.90    6.70
  -5  -6  -1   37.00    7.00
   5  -6   1   36.10    6.10
  -5  -6  -1   29.70    4.40
  -5   6  -1   34.20    3.90
  -5   6  -1   42.80    6.20
   5   6   1   33.80    6.70
   6  -6   1    6.00    4.90
  -6  -6  -1    5.40    4.30
  -6  -6  -1    8.10    5.30
  -6   6  -1   -9.70    5.00
   6   6   1    4.80    7.60
  -6   6  -1   -1.80    2.60
  -7  -6  -1    7.60    6.00
   7  -6   1    2.20    9.30
  -7  -6  -1   12.30    8.80
  -7   6  -1   12.30    3.90
  -7   6  -1   13.50    7.30
   7   6   1   17.20   11.70
   7  -7  -1   21.10    9.90
  -7  -7   1   -3.30    4.60
  -7  -7   1   -4.70    6.30
  -7   7   1   -2.70    7.60
   7   7  -1    8.80    9.60
  -6  -7   1   -0.70    5.70
   6  -7  -1    8.40    6.40
  -6  -7   1   -2.80    4.70
   6   7  -1   -1.90    5.60
  -6   7   1   -2.60    3.10
  -6   7   1    4.70    5.80
  -5  -7   1   26.90    6.90
  -5  -7   1   28.40    4.80
   5  -7  -1   29.60    5.70
  -5   7   1   28.10    4.30
  -5   7   1   34.80    6.10
   5   7  -1   31.10    7.00
   4  -7  -1   23.60    4.80
  -4  -7   1   17.30    4.90
  -4  -7   1   26.80    4.40
   4   7  -1   24.60    5.50
  -4   7   1   24.90    3.50
  -4   7   1   26.70    4.10
   3  -7  -1   58.29    5.30
  -3  -7   1   66.99    6.10
  -3  -7   1   62.99    5.40
   3   7  -1   69.29    6.50
   3   7  -1   74.29    5.50
  -3   7   1   72.99    4.90
  -3   7   1   64.19    4.40
  -2  -7   1  117.89    6.50
   2  -7  -1  113.89    5.90
  -2  -7   1  121.69    6.40
   2   7  -1  113.39    5.80
  -2   7   1  118.69    5.40
   2   7  -1  114.39    6.90
  -2   7   1  118.09    5.80
   1  -7  -1  122.79    5.50
   1  -7  -1  120.29    5.30
  -1  -7   1  121.09    5.90
  -1  -7   1  121.79    5.90
   1   7  -1  123.89    6.30
   1   7  -1  120.59    5.60
  -1   7   1  118.59    5.30
  -1   7   1  122.49    5.30
   0  -7   1    0.80    1.20
   0  -7   1    1.40    1.80
   0  -7  -1    0.20    2.10
   0  -7  -1   -0.50    1.70
   0  -7  -1    3.00    1.70
   0  -7   1   -1.40    1.40
   0   7  -1    0.20    1.40
   0   7   1   -2.70    1.30
  -1  -7  -1  114.39    5.80
  -1  -7  -1  101.29    6.50
   1  -7   1  110.09    4.70
   1  -7   1  111.79    4.80
   1   7   1  110.99    5.30
   1   7   1  110.19    6.30
  -1   7  -1  105.19    4.50
  -1   7  -1  113.49    4.90
   2  -7   1   24.50    3.20
  -2  -7  -1   20.90    4.30
  -2  -7  -1   21.60    3.50
  -2   7  -1   20.90    2.70
   2   7   1   20.10    3.20
   2   7   1   27.50    4.80
  -2   7  -1   20.60    2.60
   3  -7   1   12.50    3.10
  -3  -7  -1   12.80    4.40
  -3  -7  -1   15.80    3.70
   3   7   1   11.20    3.90
   3   7   1   10.40    2.90
  -3   7  -1   10.80    2.00
  -3   7  -1   12.80    2.90
  -4  -7  -1    2.00    4.20
   4  -7   1   -3.50    3.50
  -4  -7  -1   -4.70    1.90
  -4   7  -1    1.20    2.50
   4   7   1   -3.00    1.60
   4   7   1    4.70    4.70
  -4   7  -1    2.60    1.80
  -5  -7  -1  169.18   12.40
  -5  -7  -1  176.28    9.80
   5  -7   1  173.88   10.70
  -5   7  -1  162.68    6.90
  -5   7  -1  172.28    9.80
   5   7   1  120.89   10.30
  -6  -7  -1   -6.40    4.40
  -6  -7  -1    1.60    5.40
   6  -7   1  -10.30    5.30
  -6   7  -1   -0.40    3.00
  -6   7  -1    7.20    5.60
   6   7   1  -10.20    7.50
   7  -7   1    6.50    9.60
  -7  -7  -1    5.40    7.80
  -7  -7  -1    3.90    6.70
   7   7   1   -2.00   11.10
  -7   7  -1   -0.10    3.90
  -7   7  -1    5.30    7.30
  -7  -8   1   -9.70    7.70
  -7  -8   1    6.50    7.30
   7  -8  -1    9.10    9.80
  -7   8   1    7.20    6.30
   7   8  -1  -13.50    9.90
  -7   8   1   -2.80    4.90
  -6  -8   1   -0.50    5.60
   6  -8  -1    1.20    6.70
  -6  -8   1   -4.60    6.10
  -6   8   1    2.40    6.10
   6   8  -1   -6.00    5.60
  -6   8   1   -7.10    3.70
  -5  -8   1   60.59    8.90
   5  -8  -1   63.99    7.20
  -5  -8   1   82.49    8.50
  -5   8   1   62.39    6.10
   5   8  -1   77.99   10.30
  -4  -8   1    1.00    2.30
   4  -8  -1    6.70    4.10
  -4  -8   1    5.30    4.60
  -4   8   1    2.70    3.00
   4   8  -1    2.50    4.70
  -4   8   1    0.90    2.50
   3  -8  -1   -4.00    2.40
  -3  -8   1   -0.90    1.90
  -3  -8   1    1.80    3.20
  -3   8   1   -0.20    2.20
  -3   8   1    0.80    2.00
   3   8  -1   -2.20    2.80
   3   8  -1    2.90    3.80
   2  -8  -1  815.92   20.50
  -2  -8   1  791.82   21.40
  -2  -8   1  826.92   21.10
  -2   8   1  819.22   20.30
   2   8  -1  808.62   21.80
   2   8  -1  814.82   20.90
  -2   8   1  778.62   19.70
   1  -8  -1    1.60    1.80
   1  -8  -1    1.00    1.80
  -1  -8   1    1.40    2.10
  -1  -8   1    0.40    1.60
   1   8  -1    3.90    2.20
  -1   8   1    2.20    1.60
   1   8  -1    1.80    2.70
  -1   8   1    1.50    1.60
   0  -8  -1   67.09    4.40
   0  -8   1   75.69    3.90
   0  -8   1   75.59    4.90
   0  -8  -1   73.89    4.50
   0  -8   1   77.39    4.80
   0  -8  -1   69.59    5.60
   0   8  -1   68.29    4.40
   0   8   1   81.69    5.00
  -1  -8  -1   84.09    6.30
  -1  -8  -1   73.49    5.40
   1  -8   1   90.79    4.60
   1  -8   1   85.59    4.60
   1   8   1   90.49    6.50
  -1   8  -1   86.69    4.70
  -1   8  -1   83.99    4.20
   1   8   1   86.79    5.00
  -2  -8  -1   17.10    4.40
  -2  -8  -1   19.30    3.60
   2  -8   1   18.20    3.00
   2  -8   1   21.20    2.70
   2   8   1   21.00    4.30
   2   8   1   20.10    3.60
  -2   8  -1   19.70    2.90
  -2   8  -1   21.50    3.00
   3  -8   1    1.70    2.70
  -3  -8  -1   -0.30    3.80
  -3  -8  -1   -0.50    2.00
   3   8   1   -3.40    2.50
  -3   8  -1    0.60    2.20
   3   8   1    0.10    4.20
  -3   8  -1    1.20    1.80
   4  -8   1   92.39    7.70
  -4  -8  -1   87.19    9.10
  -4  -8  -1   84.29    7.40
   4   8   1   86.69    6.40
  -4   8  -1  102.19    7.20
  -4   8  -1   93.19    5.40
   4   8   1   89.89    9.80
   5  -8   1   16.40    5.50
  -5  -8  -1    2.60    5.80
  -5  -8  -1    3.70    4.30
   5   8   1    7.60    6.90
  -5   8  -1    4.70    2.90
  -5   8  -1    3.20    4.00
  -6  -8  -1    2.90    6.10
  -6  -8  -1   -4.20    5.30
   6  -8   1   11.90    5.90
  -6   8  -1    3.00    6.40
  -6   8  -1    5.50    3.40
   6   8   1    6.70    6.70
  -7  -8  -1    8.50    7.50
   7  -8   1   23.80   10.00
  -7  -8  -1    0.80    7.20
  -7   8  -1   15.40    8.50
   7   8   1   16.30   12.90
  -7   8  -1    2.80    4.60
   7  -9  -1   -2.80    8.40
  -7  -9   1   15.70    8.30
  -7  -9   1    8.70    9.40
   7   9  -1   35.10   13.80
  -7   9   1   10.10    9.20
  -7   9   1    9.40    5.30
  -6  -9   1    3.40    7.50
  -6  -9   1    1.00    4.30
   6  -9  -1    6.70    7.50
  -6   9   1    0.80    3.90
   6   9  -1  -16.30    7.70
  -6   9   1    1.60    5.00
  -5  -9   1    8.60    5.60
  -5  -9   1    2.40    3.10
   5  -9  -1    0.80    3.90
  -5   9   1    1.50    4.50
  -5   9   1   -5.80    3.00
   5   9  -1   -1.90    6.40
   4  -9  -1   73.09    7.60
  -4  -9   1   78.99    8.50
  -4  -9   1   58.79    6.90
  -4   9   1   75.59    5.80
   4   9  -1   67.89    9.00
  -4   9   1   71.09    6.90
   3  -9  -1    3.80    3.40
  -3  -9   1   -0.20    2.30
  -3  -9   1   -0.90    3.60
  -3   9   1   -1.60    2.10
  -3   9   1   -1.60    2.60
   3   9  -1    0.90    3.70
   3   9  -1    0.50    2.70
  -2  -9   1  144.79    7.30
  -2  -9   1  144.89    8.00
   2  -9  -1  143.39    6.80
   2   9  -1  141.39    7.10
  -2   9   1  159.48    7.10
  -2   9   1  147.49    7.00
   2   9  -1  148.69    8.50
  -1  -9   1  101.49    6.60
   1  -9  -1  115.19    6.00
   1  -9  -1  108.59    5.50
  -1  -9   1  107.29    6.20
  -1   9   1  106.79    6.00
   1   9  -1  110.69    6.40
  -1   9   1   98.19    5.60
   0  -9   1    5.20    2.00
   0  -9   1    5.30    2.60
   0  -9  -1    7.20    2.70
   0  -9   1    3.30    2.60
   0  -9  -1    2.30    2.30
   0  -9  -1    4.40    3.20
   0   9  -1    5.50    1.90
   0   9   1    7.80    2.70
   1  -9   1   -1.80    1.70
  -1  -9  -1    0.50    2.80
   1  -9   1    3.10    1.80
  -1  -9  -1   -2.70    2.40
  -1   9  -1    0.70    1.90
  -1   9  -1    2.90    1.50
   1   9   1   -2.90    2.10
   1   9   1   -1.10    3.30
   2  -9   1   36.40    3.90
  -2  -9  -1   40.80    6.00
  -2  -9  -1   31.30    4.10
   2  -9   1   34.10    3.40
  -2   9  -1   30.10    3.50
   2   9   1   26.20    4.20
   2   9   1   28.90    5.00
  -2   9  -1   33.10    3.50
  -3  -9  -1   23.60    5.40
   3  -9   1   16.20    4.20
  -3  -9  -1   13.00    3.80
  -3   9  -1   17.70    3.20
   3   9   1   18.10    3.40
   3   9   1   24.60    5.50
  -3   9  -1   19.40    3.40
  -4  -9  -1   81.09    9.50
  -4  -9  -1   86.69    7.70
   4  -9   1   76.09    6.70
   4   9   1   82.29   10.40
  -4   9  -1   78.99    5.60
   4   9   1   82.09    7.40
  -4   9  -1   83.09    7.00
  -5  -9  -1   85.59    7.60
  -5  -9  -1   95.09   11.50
   5  -9   1   87.89    9.60
   5   9   1   97.59   12.50
  -5   9  -1   96.59    8.60
  -5   9  -1   91.09    6.30
   6  -9   1    8.70    6.80
  -6  -9  -1    9.10    7.80
  -6  -9  -1    6.80    6.10
   6   9   1    9.30   10.20
  -6   9  -1    5.40    3.80
  -6   9  -1    0.50    5.90
  -7  -9  -1   21.50   10.20
  -7  -9  -1   -4.20    7.70
   7  -9   1    1.40    7.60
  -7   9  -1   -3.90    7.70
   7   9   1    5.70   13.00
  -7   9  -1   10.20    5.20
  -6 -10   1  -15.50    6.20
  -6 -10   1    6.60    7.50
   6 -10  -1    2.30    5.40
   6  10  -1    5.60    9.80
  -6  10   1    6.80    4.30
  -6  10   1   12.40    7.40
   5 -10  -1    2.50    5.90
  -5 -10   1    0.10    6.10
  -5 -10   1   -6.40    4.90
  -5  10   1    2.50    3.70
   5  10  -1    5.70    7.10
  -5  10   1    0.00    3.80
  -4 -10   1    7.80    5.30
  -4 -10   1    1.00    3.40
   4 -10  -1    2.50    3.50
  -4  10   1   -2.50    3.60
  -4  10   1    5.60    3.10
   4  10  -1    0.60    5.10
  -3 -10   1   17.70    5.00
   3 -10  -1   20.30    4.50
  -3 -10   1   28.20    5.70
  -3  10   1   14.50    3.50
  -3  10   1   23.80    4.20
   3  10  -1   22.40    5.50
   3  10  -1    9.60    3.30
  -2 -10   1   -1.10    3.00
  -2 -10   1    5.30    3.60
   2 -10  -1    7.20    3.00
   2 -10  -1    4.30    2.50
   2  10  -1    5.10    4.10
  -2  10   1    2.40    2.50
  -2  10   1    7.60    2.80
   2  10  -1    2.70    3.00
   1 -10  -1  303.67   10.30
  -1 -10   1  287.97   10.60
   1 -10  -1  306.37   10.50
  -1 -10   1  286.37   11.40
  -1 -10   1  300.17    9.60
   1  10  -1  295.67   11.00
  -1  10   1  289.17   10.40
   0 -10   1   -0.70    1.80
   0 -10   1   -2.20    2.50
   0 -10  -1   -3.20    2.30
   0 -10   1    0.30    2.40
   0 -10  -1   -0.30    3.40
   0 -10  -1   -0.80    1.90
   0  10   1    1.70    2.60
   0  10  -1   -1.10    2.20
   1 -10   1   -0.50    2.10
   1 -10   1    0.10    1.90
  -1 -10  -1    0.70    3.30
  -1 -10  -1   -0.10    2.70
   1  10   1   -2.20    1.70
  -1  10  -1    1.90    2.30
  -1  10  -1   -3.50    1.50
  -2 -10  -1    0.10    3.40
  -2 -10  -1    5.10    2.40
   2 -10   1    3.30    2.40
   2 -10   1    1.00    2.00
  -2  10  -1    4.10    2.40
   2  10   1    5.90    3.40
   2  10   1    4.40    3.00
  -2  10  -1    4.40    2.30
  -3 -10  -1    2.00    3.50
  -3 -10  -1    0.00    3.50
   3 -10   1    5.10    3.30
   3  10   1    5.60    5.40
  -3  10  -1    2.30    2.70
   3  10   1    4.10    3.20
  -3  10  -1    2.40    2.80
  -4 -10  -1   90.99    7.40
  -4 -10  -1   91.59    8.90
   4 -10   1   91.99    8.20
   4  10   1   89.79    8.20
  -4  10  -1   90.69    7.40
  -4  10  -1   89.39    6.30
   4  10   1  105.49   11.00
  -5 -10  -1    2.40    5.50
   5 -10   1    2.50    5.10
  -5 -10  -1    7.60    5.80
   5  10   1   -1.60    8.40
  -5  10  -1   -1.30    3.40
  -5  10  -1   -0.80    4.60
   6 -10   1    1.60    7.70
  -6 -10  -1   -1.10    8.30
  -6 -10  -1   -4.70    4.70
  -6  10  -1   11.60    6.50
  -6  10  -1    2.30    4.30
   6  10   1    3.70   10.70
   6 -11  -1  -10.70    8.00
  -6 -11   1   -4.00    7.70
  -6 -11   1   -6.90    7.40
   6  11  -1   14.30   11.00
  -6  11   1   -0.80    4.90
  -6  11   1   16.70    7.60
   5 -11  -1   -6.50    5.80
  -5 -11   1    8.10    5.00
  -5 -11   1   -0.80    6.50
   5  11  -1    1.00    7.70
  -5  11   1   11.10    3.90
  -5  11   1   -2.00    3.70
   4 -11  -1   18.80    6.30
  -4 -11   1   19.30    5.70
  -4 -11   1   32.20    7.00
  -4  11   1   31.80    5.10
  -4  11   1   16.80    5.00
   4  11  -1   29.00    6.80
  -3 -11   1   44.10    6.60
  -3 -11   1   42.60    5.60
   3 -11  -1   43.70    5.90
  -3  11   1   39.30    5.00
   3  11  -1   39.20    5.40
   3  11  -1   33.40    6.70
  -3  11   1   45.20    6.00
  -2 -11   1   43.40    5.00
   2 -11  -1   41.50    4.10
  -2 -11   1   44.90    6.40
   2 -11  -1   43.90    5.40
   2  11  -1   51.69    6.00
  -2  11   1   38.90    4.90
  -2  11   1   42.50    5.40
   2  11  -1   45.40    6.30
   1 -11  -1   49.00    4.90
   1 -11  -1   45.60    4.80
  -1 -11   1   39.80    5.20
  -1 -11   1   38.90    4.50
   1 -11  -1   45.00    6.30
  -1 -11   1   36.70    5.60
   1  11  -1   38.60    5.20
  -1  11   1   38.60    5.00
   0 -11   1   13.40    3.50
   0 -11  -1   22.90    5.20
   0 -11  -1   15.30    3.00
   0 -11   1   16.90    4.10
   0 -11  -1   13.10    3.60
   0 -11   1   18.80    3.30
   0  11   1   17.80    4.10
   0  11  -1   11.20    2.90
  -1 -11  -1    2.80    2.30
  -1 -11  -1   -1.20    3.80
   1 -11   1    6.80    2.80
  -1 -11  -1    1.90    2.50
   1 -11   1    0.20    2.30
  -1  11  -1    4.80    2.80
   1  11   1    0.90    3.10
  -2 -11  -1   27.90    4.50
  -2 -11  -1   26.20    5.60
   2 -11   1   20.70    3.70
   2 -11   1   24.70    3.80
   2  11   1   20.00    4.60
   2  11   1   29.90    6.40
  -2  11  -1   17.40    3.50
  -2  11  -1   19.90    3.50
  -3 -11  -1   25.70    5.80
   3 -11   1   20.90    4.70
  -3 -11  -1   14.60    4.60
   3  11   1   12.90    4.30
   3  11   1   16.30    6.50
  -3  11  -1   24.70    3.80
  -3  11  -1   21.90    4.20
  -4 -11  -1   12.40    4.80
   4 -11   1   10.80    5.20
  -4 -11  -1   18.20    7.30
  -4  11  -1   12.40    4.40
   4  11   1    7.40    4.70
   4  11   1   14.40    6.80
  -4  11  -1   11.10    3.90
   5 -11   1    2.80    6.30
  -5 -11  -1  -12.00    5.40
  -5 -11  -1   11.20    8.60
  -5  11  -1   10.20    5.10
  -5  11  -1   -3.10    3.50
   5  11   1   -3.50    7.90
  -6 -11  -1   -1.10    6.90
  -6 -11  -1    2.00    6.60
   6 -11   1    5.10    7.50
   6  11   1    9.10    9.90
  -6  11  -1    1.10    4.80
  -6  11  -1   10.40    7.30
   6 -12  -1   -9.70    7.70
  -6 -12   1   14.80    9.60
  -6 -12   1    5.60    6.50
  -6  12   1   -4.20    7.00
   6  12  -1    8.70   12.90
  -6  12   1    4.10    5.90
  -5 -12   1    2.80    5.80
   5 -12  -1   -7.70    5.50
  -5 -12   1    2.00    6.80
  -5  12   1    9.90    6.10
   5  12  -1    4.60    8.50
  -5  12   1   -5.90    4.50
   4 -12  -1   -2.60    4.50
  -4 -12   1   10.50    4.30
  -4 -12   1    9.10    6.30
   4  12  -1   -2.60    4.10
  -4  12   1    4.30    4.50
  -4  12   1    3.60    4.30
   4  12  -1   -3.80    5.70
  -3 -12   1   17.60    5.70
  -3 -12   1    0.20    4.40
   3 -12  -1    6.20    3.90
   3  12  -1    5.90    4.50
  -3  12   1    6.20    4.20
   3  12  -1   13.60    6.40
  -3  12   1    4.20    3.70
  -2 -12   1    3.10    4.30
   2 -12  -1    8.60    3.60
  -2 -12   1    1.10    3.90
   2 -12  -1    1.90    2.80
  -2  12   1    2.90    3.20
  -2  12   1    9.50    3.50
   2  12  -1    4.40    4.50
   2  12  -1    8.70    3.40
   1 -12  -1   12.00    3.30
   1 -12  -1   12.80    3.60
  -1 -12   1    9.20    3.10
  -1 -12   1    4.20    4.30
  -1 -12   1   11.30    4.20
   1 -12  -1    6.70    4.80
  -1  12   1    8.30    3.70
   1  12  -1    5.30    3.10
   0 -12   1    4.80    3.70
   0 -12   1    3.70    3.30
   0 -12   1   11.80    3.00
   0 -12  -1   10.30    3.20
   0 -12  -1    3.20    3.10
   0 -12  -1    2.90    3.80
   0  12   1    5.50    3.00
   0  12  -1    3.50    3.30
  -1 -12  -1   11.80    5.10
   1 -12   1   10.80    3.70
  -1 -12  -1    9.80    3.40
   1 -12   1   12.00    4.50
  -1 -12  -1   11.40    3.80
   1 -12   1   12.80    3.20
   1  12   1    6.00    3.00
  -1  12  -1    7.50    3.20
   2 -12   1   -0.80    2.60
  -2 -12  -1    4.50    3.00
   2 -12   1    2.70    2.70
  -2 -12  -1    1.40    4.80
   2  12   1    0.90    3.70
  -2  12  -1   -0.90    2.50
  -2  12  -1    0.90    3.10
   2  12   1    0.60    5.30
  -3 -12  -1   58.29    8.80
  -3 -12  -1   63.99    6.30
   3 -12   1   65.59    7.20
  -3  12  -1   72.19    6.30
  -3  12  -1   68.59    6.30
   3  12   1   72.99    7.90
   3  12   1   78.19   10.40
  -4 -12  -1   12.90    7.10
   4 -12   1   26.80    6.10
  -4 -12  -1   18.90    6.00
   4  12   1   19.40    5.00
  -4  12  -1   27.10    4.70
  -4  12  -1   17.50    5.10
   4  12   1    3.00    5.80
   5 -12   1    0.10    6.40
  -5 -12  -1   -2.50    6.80
  -5 -12  -1   -0.90    7.70
  -5  12  -1    7.70    4.50
   5  12   1   12.20    8.70
  -5  12  -1   -0.70    5.10
  -6 -12  -1   22.40   11.00
   6 -12   1   11.40    7.90
  -6 -12  -1  -10.30    7.60
  -6  12  -1   -4.70    7.20
  -6  12  -1    8.90    5.40
   6  12   1   -7.10   12.90
  -6 -13   1   10.90    9.10
  -6 -13   1  -16.40    8.70
   6 -13  -1  -11.40    9.10
   6  13  -1   27.00   11.30
  -6  13   1    3.90    8.10
  -5 -13   1    3.00    7.70
  -5 -13   1    5.30    6.90
   5 -13  -1    1.00    7.10
  -5  13   1    1.30    5.20
  -5  13   1    1.00    6.20
   5  13  -1  -10.00    8.80
  -4 -13   1   -2.10    4.90
   4 -13  -1   -1.10    5.40
  -4 -13   1   -0.70    6.00
  -4  13   1    3.70    4.50
   4  13  -1   11.70    5.70
   4  13  -1   12.50    7.40
  -4  13   1   -0.80    4.30
  -3 -13   1   12.80    6.10
   3 -13  -1   -5.70    4.00
  -3 -13   1    5.10    4.80
  -3  13   1    3.50    4.20
   3  13  -1    2.80    6.00
   3  13  -1    0.40    4.60
  -3  13   1   -1.70    3.90
  -2 -13   1    1.50    4.60
  -2 -13   1   -4.60    4.00
   2 -13  -1    1.40    3.40
   2 -13  -1   -8.20    2.80
  -2  13   1   -2.40    3.20
   2  13  -1    5.30    4.10
  -2  13   1   -8.60    3.20
   1 -13  -1   -8.40    4.40
  -1 -13   1   -2.70    3.70
   1 -13  -1    1.60    3.30
  -1 -13   1   -1.60    4.20
   1 -13  -1    2.20    3.30
  -1 -13   1    2.40    3.20
   1  13  -1   -0.10    2.90
  -1  13   1   -0.40    3.30
   0 -13   1   12.30    4.50
   0 -13  -1    4.40    5.00
   0 -13   1    5.10    2.80
   0 -13  -1    2.70    3.40
   0 -13   1    7.00    3.80
   0 -13  -1    8.40    3.70
   0  13   1   11.00    3.70
   0  13  -1    6.20    3.10
   1 -13   1    7.30    3.20
  -1 -13  -1    3.50    4.40
  -1 -13  -1   13.40    4.50
   1 -13   1    0.90    4.50
  -1 -13  -1   -0.30    3.70
   1 -13   1    5.60    2.60
  -1  13  -1    1.30    2.40
   1  13   1    5.30    4.10
  -2 -13  -1   10.40    3.80
   2 -13   1    5.60    3.30
  -2 -13  -1    6.40    5.60
   2 -13   1    9.70    3.50
   2  13   1    5.70    3.70
  -2  13  -1    3.20    3.50
  -2  13  -1    8.10    4.00
  -3 -13  -1   19.20    4.90
  -3 -13  -1   10.90    5.70
   3 -13   1   21.70    5.20
   3  13   1   23.80    7.20
   3  13   1   12.00    5.40
  -3  13  -1   19.20    4.60
  -3  13  -1   21.30    4.60
  -4 -13  -1   -6.10    7.80
   4 -13   1    0.00    5.00
  -4 -13  -1  -11.40    5.20
   4  13   1   -1.30    8.40
  -4  13  -1   -3.90    4.10
   4  13   1    5.00    4.00
  -4  13  -1   -1.10    4.80
  -5 -13  -1    7.30    9.30
  -5 -13  -1    7.00    7.10
   5 -13   1   -3.10    6.90
  -5  13  -1    0.50    4.00
  -5  13  -1    0.60    5.40
   5  13   1  -12.50   10.50
   5 -14  -1   -0.40    7.60
  -5 -14   1    7.90    9.10
  -5 -14   1   14.20    8.40
  -5  14   1    0.70    6.10
   5  14  -1    1.30   10.90
  -5  14   1    4.30    7.40
  -4 -14   1   -8.30    7.40
  -4 -14   1   15.30    6.80
   4 -14  -1    6.90    6.30
  -4  14   1   -3.80    5.00
   4  14  -1    8.90    6.80
  -4  14   1    6.90    5.80
   4  14  -1   13.00    8.60
  -3 -14   1    6.60    6.40
   3 -14  -1    4.90    4.60
  -3 -14   1    6.90    5.30
   3  14  -1    4.50    5.30
  -3  14   1   13.60    4.40
  -3  14   1    0.80    4.10
   3  14  -1    7.30    6.90
  -2 -14   1    3.90    3.50
   2 -14  -1    0.70    4.10
   2 -14  -1   -1.90    3.40
  -2 -14   1    6.10    4.90
  -2 -14   1   -2.50    4.60
  -2  14   1   -4.50    3.50
   2  14  -1   -3.30    4.80
  -1 -14   1    3.90    3.60
   1 -14  -1    6.80    3.00
   1 -14  -1    7.60    5.60
  -1 -14   1   -5.70    4.40
   1 -14  -1   -2.00    3.60
  -1 -14   1   -2.70    4.00
  -1  14   1    3.20    4.10
   1  14  -1    3.40    4.30
   0 -14   1   15.00    3.70
   0 -14  -1    7.00    5.30
   0 -14  -1    6.80    3.70
   0 -14   1    5.40    4.60
   0 -14  -1   16.10    4.70
   0 -14   1    8.70    3.60
   0  14  -1   14.30    4.70
   0  14   1   11.30    4.40
   1 -14   1   31.00    6.50
  -1 -14  -1   21.70    7.10
  -1 -14  -1   16.00    4.70
  -1 -14  -1   31.10    5.20
   1 -14   1   34.70    5.60
   1 -14   1   31.80    5.10
   1  14   1   23.40    5.10
  -1  14  -1   32.00    5.50
   2 -14   1   -3.70    3.60
  -2 -14  -1    0.10    3.50
  -2 -14  -1   -3.40    3.50
  -2 -14  -1    2.00    5.80
   2 -14   1   -1.70    3.30
   2  14   1    2.40    4.50
  -2  14  -1   -2.50    4.00
   3 -14   1   58.49    7.90
  -3 -14  -1   79.39   10.70
  -3 -14  -1   60.49    7.70
   3  14   1   64.19   10.80
   3  14   1   81.69    9.70
  -3  14  -1   63.49    7.20
  -3  14  -1   66.99    8.10
  -4 -14  -1   11.40    6.80
  -4 -14  -1  -13.40    7.80
   4 -14   1    1.90    5.20
   4  14   1   33.40   10.80
  -4  14  -1   -6.20    5.10
  -4  14  -1    0.20    4.30
   4  14   1    3.30    4.70
  -5 -14  -1   -2.70    9.70
   5 -14   1    4.90    7.90
  -5 -14  -1    4.50    7.80
   5  14   1  -18.70   11.40
  -5  14  -1    7.90    5.40
  -5  14  -1  -11.90    6.00
  -5 -15   1   -3.80    6.90
  -5 -15   1   17.90    9.30
   5 -15  -1   -2.70    7.60
   5  15  -1   -3.00   12.40
  -5  15   1   -1.40    6.90
  -5  15   1    4.60    6.50
   4 -15  -1   11.40    6.10
  -4 -15   1    1.50    7.30
  -4 -15   1   -3.10    7.50
  -4  15   1   -5.50    5.30
  -4  15   1    1.30    6.00
   4  15  -1  -10.30    6.20
  -3 -15   1    0.00    6.00
  -3 -15   1    0.50    4.30
   3 -15  -1    4.60    5.30
   3  15  -1   11.80    8.30
  -3  15   1    7.30    5.60
   3  15  -1    9.30    6.00
  -3  15   1    6.50    5.50
  -2 -15   1   -5.60    5.70
  -2 -15   1    1.30    4.10
  -2 -15   1    0.70    4.00
   2 -15  -1   -3.80    3.60
   2 -15  -1   -3.70    4.90
   2 -15  -1   -6.20    6.70
   2  15  -1    1.00    5.70
  -2  15   1    3.80    5.30
   1 -15  -1    2.90    6.00
  -1 -15   1   -5.20    4.70
  -1 -15   1    0.60    3.80
   1 -15  -1    0.60    4.10
  -1 -15   1    5.20    6.00
   1 -15  -1   14.10    4.30
  -1  15   1    3.50    4.70
   1  15  -1   11.80    5.00
   0 -15  -1   13.80    5.50
   0 -15   1   14.30    4.30
   0 -15  -1   12.50    6.40
   0 -15   1   10.00    3.80
   0 -15  -1    8.60    4.70
   0 -15   1    6.60    5.70
   0  15  -1   10.80    4.10
   0  15   1   13.90    5.00
  -1 -15  -1   16.50    5.80
   1 -15   1   22.40    5.20
   1 -15   1   15.40    6.40
  -1 -15  -1   17.40    7.30
   1 -15   1   18.80    4.90
  -1 -15  -1   20.00    5.30
  -1  15  -1   20.60    5.60
   1  15   1   17.40    5.80
  -2 -15  -1   27.20    6.10
  -2 -15  -1   10.60    6.60
   2 -15   1   23.40    4.80
   2 -15   1   26.60    5.10
  -2 -15  -1   19.70    5.20
   2  15   1   19.00    6.20
  -2  15  -1   16.00    5.30
  -3 -15  -1   -1.20    4.70
   3 -15   1    0.30    4.60
  -3 -15  -1   -1.10    7.30
   3  15   1   20.60    9.80
   3  15   1    2.90    5.90
  -3  15  -1    3.00    5.10
  -3  15  -1   -1.30    4.50
   4 -15   1    0.30    6.50
  -4 -15  -1   -4.90    8.20
  -4 -15  -1    2.30    8.20
   4  15   1   -0.80    5.00
  -4  15  -1   -2.30    5.60
   4  15   1  -20.00    9.30
  -4  15  -1   -0.10    5.50
   4 -16  -1    5.00    6.70
  -4 -16   1   -6.10    8.40
  -4 -16   1   19.30    7.90
  -4  16   1   -0.60    6.20
  -4  16   1    3.20    6.70
   4  16  -1   -7.60   10.60
   4  16  -1  -12.80    7.00
  -3 -16   1  -10.50    5.00
   3 -16  -1    4.10    5.50
  -3 -16   1    5.50    8.00
  -3  16   1   -1.00    5.50
   3  16  -1    5.70    7.10
  -3  16   1    3.10    5.80
  -2 -16   1   -0.80    4.60
  -2 -16   1   -6.30    6.50
   2 -16  -1   -1.80    7.60
  -2 -16   1   -6.90    4.30
   2 -16  -1   -1.30    4.20
   2 -16  -1   -2.60    5.40
  -2  16   1   10.90    5.80
   2  16  -1   -3.50    4.00
  -1 -16   1   10.50    5.90
   1 -16  -1   -4.20    4.80
   1 -16  -1   12.20    7.70
  -1 -16   1   -2.00    4.30
   1 -16  -1    1.00    4.40
  -1 -16   1    5.20    6.30
   1  16  -1   15.50    5.50
  -1  16   1   -2.90    4.80
   0 -16   1    0.60    3.80
   0 -16  -1  -11.50    6.00
   0 -16  -1   -0.40    4.80
   0 -16  -1   -1.70    3.70
   0 -16   1   -3.00    4.40
   0 -16   1    2.20    6.00
   0  16  -1    0.80    5.00
   0  16   1   -5.20    5.10
  -1 -16  -1  -13.50    6.80
   1 -16   1    1.60    4.70
  -1 -16  -1    6.90    5.40
   1 -16   1   -2.40    4.20
  -1 -16  -1   -3.80    3.90
   1 -16   1   -7.60    6.20
  -1  16  -1   -6.70    5.10
   1  16   1   -4.20    4.00
   2 -16   1    8.10    5.00
  -2 -16  -1    4.50    6.60
  -2 -16  -1   15.70    7.90
   2 -16   1    0.30    6.90
   2 -16   1    0.50    4.50
  -2 -16  -1   -1.00    5.00
   2  16   1   -6.00    4.10
  -2  16  -1    2.10    5.00
  -3 -16  -1   -1.50    5.00
   3 -16   1    5.80    6.20
  -3 -16  -1    6.00    7.80
   3  16   1    3.60    5.00
  -3  16  -1    0.10    5.70
  -3  16  -1    4.10    5.40
  -4 -16  -1   -7.40    8.90
  -4 -16  -1   -6.20    8.90
   4 -16   1   -3.80    7.00
   4  16   1    4.30    5.90
   4  16   1  -10.40   11.80
  -4  16  -1   -2.90    6.00
  -4  16  -1   -1.50    6.80
  -3 -17   1    7.00    6.30
   3 -17  -1   -3.20    6.80
  -3 -17   1    9.90    8.40
  -3 -17   1   -1.90    8.20
   3  17  -1   -4.30    7.60
  -3  17   1   12.00    7.00
  -2 -17   1    3.40    7.50
   2 -17  -1   -9.00    8.50
  -2 -17   1   -1.40    4.90
   2 -17  -1   -4.40    5.60
  -2 -17   1   -4.40    5.20
   2 -17  -1    0.00    5.00
  -2  17   1    0.50    6.60
   2  17  -1    0.30    4.90
  -1 -17   1    3.50    7.60
   1 -17  -1   -0.40    5.60
  -1 -17   1    2.70    6.60
   1 -17  -1   -6.80    4.80
  -1 -17   1   -5.40    5.10
   1 -17  -1   26.70    9.40
  -1  17   1   -8.90    5.20
   1  17  -1    8.00    6.50
   0 -17   1    9.80    5.90
   0 -17   1   -0.60    7.80
   0 -17  -1  -15.60    7.20
   0 -17  -1   -7.50    5.10
   0 -17   1    5.40    4.80
   0 -17  -1    3.00    6.20
   0  17  -1    5.80    6.30
   0  17   1    2.20    6.10
   1 -17   1    0.30    7.60
   1 -17   1    5.10    5.30
   1 -17   1    7.70    5.70
  -1 -17  -1   14.90    5.20
  -1 -17  -1    6.50    6.20
  -1 -17  -1    5.60    7.80
   1  17   1    5.00    6.00
  -1  17  -1    9.30    6.50
  -2 -17  -1   10.90    6.50
   2 -17   1   18.40    5.70
   2 -17   1   21.20    9.20
   2 -17   1   12.80    5.30
  -2 -17  -1    4.50    7.30
  -2 -17  -1   25.50    8.70
  -2  17  -1    7.00    5.90
   2  17   1    7.50    7.30
  -3 -17  -1   -4.00    6.80
  -3 -17  -1   -2.90    7.90
  -3 -17  -1   20.40    8.40
   3 -17   1    4.10    6.40
   3  17   1  -13.10    7.10
  -3  17  -1    0.40    6.00
   2 -18  -1   -4.00    9.80
   2 -18  -1  -12.10    6.60
   2 -18  -1   -2.90    6.40
  -2 -18   1   -4.10    9.00
  -2 -18   1   -3.80    6.20
  -2 -18   1  -14.30    5.90
   2  18  -1   -3.00    7.40
  -2  18   1    4.40    7.00
  -1 -18   1   16.50    7.80
   1 -18  -1    8.00    6.50
   1 -18  -1   10.90    9.00
   1 -18  -1    7.70    7.00
  -1 -18   1   15.50    6.40
  -1 -18   1    7.70    9.00
   1  18  -1    4.90    7.20
  -1  18   1   -0.70    6.10
   0 -18  -1   11.90    7.20
   0 -18  -1    2.60    5.90
   0 -18   1    7.70    9.00
   0 -18   1    4.10    6.80
   0 -18  -1   -7.10    9.00
   0 -18   1    0.80    5.90
   0  18   1    9.70    5.90
   0  18  -1    2.90    5.60
  -1 -18  -1    7.10    7.60
   1 -18   1  -12.70    5.80
   1 -18   1    3.80    8.20
  -1 -18  -1   13.30    9.70
   1 -18   1   -9.80    5.30
  -1 -18  -1   -8.80    6.10
  -1  18  -1  -11.80    5.80
   1  18   1   -6.10    7.20
   2 -18   1   28.70   10.30
  -2 -18  -1   16.30    7.80
  -2 -18  -1    8.70    8.30
  -2 -18  -1   19.10   10.20
   2 -18   1   23.60    6.60
   2 -18   1   11.60    5.60
   2  18   1   20.20    6.80
  -2  18  -1   16.90    7.90
   1 -19  -1   -2.50    7.80
   1 -19  -1    5.00   10.40
  -1 -19   1    5.60    9.40
  -1 -19   1    5.90    6.80
  -1 -19   1   -6.60    7.60
   1 -19  -1    4.90    7.40
   1  19  -1  -21.90    7.90
  -1  19   1  -13.00    7.50
   0 -19  -1    6.40    6.70
   0 -19  -1    4.30   10.60
   0 -19  -1   -1.90    5.80
   0 -19   1   -8.70    7.50
   0 -19   1   -1.80    6.90
   0 -19   1    7.40    9.90
   0  19  -1    1.70    8.10
   0  19   1   -8.40    7.50
   1 -19   1   -4.80    6.70
   1 -19   1   18.70    9.80
  -1 -19  -1   -7.90    9.10
  -1 -19  -1   -2.70    7.90
  -1 -19  -1   17.00   10.80
   1 -19   1   -4.70    6.90
  -1  19  -1   -8.50    7.30
   1  19   1   -5.80    6.30
   8   0  -2   -4.50    7.90
  -8   0   2   -1.30    8.80
  -8   0   2    6.00    7.70
  -7   0   2    3.00    4.60
  -7   0   2   -4.80    4.90
   7   0  -2   10.60    6.70
   6   0  -2   56.29    8.00
  -6   0   2   53.69    7.20
  -5   0   2   -1.10    2.60
   5   0  -2   -4.40    2.50
  -4   0   2   65.29    5.60
   4   0  -2   64.09    6.00
   3   0  -2   -0.40    2.00
  -3   0   2    0.40    1.80
  -2   0   2  857.81   19.40
   2   0  -2  850.91   19.50
   1   0  -2    0.50    0.80
  -1   0   2    0.00    0.60
   0   0   2  191.18    5.00
   0   0  -2  186.58    4.90
  -1   0  -2   -0.30    1.00
   1   0   2   -0.10    0.30
  -1   0  -2    0.40    0.40
   1   0   2   -1.00    1.00
  -2   0  -2   50.79    3.70
  -2   0  -2   51.59    2.20
   2   0   2   47.60    3.90
  -3   0  -2    1.90    2.30
   3   0   2   -2.40    2.30
  -3   0  -2   -0.70    1.10
  -4   0  -2    0.00    1.50
  -4   0  -2    3.90    3.30
   4   0   2    0.60    2.60
   5   0   2   -1.00    4.30
  -5   0  -2    0.70    2.20
  -5   0  -2    2.60    4.30
   6   0   2   87.59   11.50
  -6   0  -2   71.49    9.70
  -6   0  -2   63.69    6.10
  -7   0  -2    6.20    7.90
   7   0   2    3.20    9.20
  -7   0  -2   -1.00    4.70
   8  -1  -2    2.80   10.70
  -8  -1   2  -15.60    6.30
  -8  -1   2   -1.50    8.70
   8   1  -2   18.80   12.20
  -8   1   2    1.20    7.10
  -8   1   2   -1.40    8.90
   7  -1  -2    1.30    7.60
  -7  -1   2    1.30    4.60
  -7  -1   2    8.50    6.60
   7   1  -2   14.50    8.80
  -7   1   2   13.70    7.00
  -6  -1   2  216.08   12.60
   6  -1  -2  214.08   13.20
   6   1  -2  161.08   11.90
  -6   1   2  214.18   12.30
   5  -1  -2    5.40    3.40
  -5  -1   2    8.40    4.00
   5   1  -2    0.70    2.90
  -5   1   2    0.00    2.80
  -4  -1   2    0.60    2.50
   4  -1  -2    2.10    2.00
  -4   1   2   -0.20    1.80
   4   1  -2   -0.30    1.90
   3  -1  -2   40.40    4.30
  -3  -1   2   46.30    4.10
  -3   1   2   45.40    4.00
   3   1  -2   40.60    3.70
  -2  -1   2    2.10    1.10
   2  -1  -2    3.00    1.40
   2   1  -2    2.60    1.50
  -2   1   2    1.50    1.20
  -1  -1   2    0.20    0.70
   1  -1  -2    0.20    0.70
   1   1  -2    0.80    0.80
  -1   1   2    1.00    0.90
   0  -1   2 3143.79   61.79
   0  -1  -2 2938.41   60.29
   0   1   2 3102.49   62.19
   0   1   2 3134.59   62.09
  -1  -1  -2    0.40    0.70
   1  -1   2    1.10    1.00
  -1  -1  -2   -0.40    0.80
  -1   1  -2    0.00    0.90
   1   1   2   -0.10    0.60
   1   1   2    1.30    1.30
  -2  -1  -2   -0.50    0.70
   2  -1   2   -0.10    1.20
  -2  -1  -2    0.80    1.40
  -2   1  -2   -0.70    0.50
   2   1   2   -0.40    1.90
   2   1   2   -1.10    0.70
  -2   1  -2    1.70    1.40
   3  -1   2   15.00    3.20
  -3  -1  -2   15.50    2.10
  -3  -1  -2   13.40    3.40
  -3   1  -2   17.10    3.30
  -3   1  -2   12.40    1.70
   3   1   2   12.40    3.50
   4  -1   2   11.90    4.30
  -4  -1  -2   10.20    2.20
  -4  -1  -2    4.40    2.80
   4   1   2    7.20    3.40
  -4   1  -2    9.70    3.50
  -4   1  -2    9.70    2.00
   5  -1   2   20.40    4.80
  -5  -1  -2   14.10    3.20
  -5  -1  -2   15.30    4.60
  -5   1  -2   14.30    2.80
  -5   1  -2   24.70    5.40
   5   1   2   20.20    6.00
  -6  -1  -2   20.90    6.80
  -6  -1  -2   23.90    4.70
   6  -1   2   31.20    6.90
  -6   1  -2   33.20    4.50
  -6   1  -2   31.90    7.50
   6   1   2   25.00    6.70
   7  -1   2   24.80   10.10
  -7  -1  -2    4.00    8.20
  -7  -1  -2   15.20    5.10
  -7   1  -2    9.30    4.70
   7   1   2    9.10    7.20
  -7   1  -2    8.80    8.00
  -8  -2   2   -8.80    8.50
   8  -2  -2    6.40   11.70
  -8  -2   2   -8.30    6.90
  -8   2   2   14.80    8.70
   8   2  -2  -11.10   11.60
  -7  -2   2   82.49    9.10
   7  -2  -2   83.99   11.40
  -7  -2   2   87.59   11.10
  -7   2   2   70.59    8.90
   7   2  -2   74.79   10.70
  -6  -2   2   74.29    7.70
  -6  -2   2   68.19    7.50
   6  -2  -2   73.79    8.00
  -6   2   2   87.69    8.70
   6   2  -2   75.39    9.90
   5  -2  -2    6.40    3.80
  -5  -2   2    8.40    4.40
  -5   2   2    5.40    3.00
   5   2  -2    6.30    3.70
  -4  -2   2   11.70    2.90
   4  -2  -2   13.50    3.40
   4   2  -2   14.00    3.80
  -4   2   2    6.20    3.00
  -3  -2   2  674.33   17.70
   3  -2  -2  667.43   17.80
   3   2  -2  649.83   17.90
  -3   2   2  691.43   17.60
   2  -2  -2   21.50    2.20
  -2  -2   2   19.30    2.40
  -2   2   2   22.30    2.20
   2   2  -2   20.10    2.50
  -1  -2   2  156.18    4.40
   1  -2  -2  155.88    4.90
  -1   2   2  163.68    5.00
   1   2  -2  164.38    4.70
   0  -2  -2    7.60    1.20
   0  -2   2    5.30    0.90
   0  -2  -2    5.10    1.50
   0   2   2    6.40    1.20
  -1  -2  -2  248.48    7.90
   1  -2   2  258.37    6.80
  -1  -2  -2  256.57    6.60
  -1   2  -2  240.38    5.10
   1   2   2  241.18    8.00
   1   2   2  251.27    6.50
  -1   2  -2  267.67    6.80
   2  -2   2  674.03   16.80
  -2  -2  -2  685.23   15.40
  -2  -2  -2  691.63   17.90
   2   2   2  679.83   15.30
  -2   2  -2  697.43   16.70
   2   2   2  662.53   17.80
  -3  -2  -2    1.00    2.00
   3  -2   2   -0.30    2.40
  -3  -2  -2    0.10    1.40
  -3   2  -2   -0.60    1.50
   3   2   2   -0.20    2.60
  -4  -2  -2   78.69    4.80
  -4  -2  -2   56.69    5.60
   4  -2   2   63.69    6.60
   4   2   2   67.89    7.10
  -4   2  -2   75.59    6.50
  -5  -2  -2   13.00    3.20
  -5  -2  -2   14.30    4.10
   5  -2   2   13.80    5.30
  -5   2  -2    9.90    4.70
   5   2   2   20.90    5.20
  -5   2  -2   13.40    2.70
  -6  -2  -2    2.90    3.50
   6  -2   2    0.80    6.50
  -6  -2  -2    5.00    6.40
  -6   2  -2    6.60    4.80
   6   2   2   -2.60    6.00
  -6   2  -2    7.80    3.40
  -7  -2  -2   -1.90    6.10
   7  -2   2    3.20    9.30
  -7  -2  -2  -13.70    4.70
  -7   2  -2   -6.70    8.30
   7   2   2    0.10    9.00
  -7   2  -2   -2.30    4.30
   8  -3  -2   16.60   12.20
  -8  -3   2   -0.80    7.40
  -8  -3   2   19.20    8.20
   8   3  -2   11.90    9.40
  -8   3   2    9.60    7.00
  -7  -3   2    0.10    6.80
  -7  -3   2    5.10    5.30
   7  -3  -2    1.80    5.80
  -7   3   2   12.10    6.60
   7   3  -2   18.40    8.90
   6  -3  -2   48.60    8.00
  -6  -3   2   26.90    7.00
  -6  -3   2   37.10    6.10
  -6   3   2   35.70    6.20
   6   3  -2   34.30    8.20
  -5  -3   2   -3.20    3.50
  -5  -3   2    5.10    2.80
   5  -3  -2    5.00    3.90
  -5   3   2   -0.50    2.40
   5   3  -2    5.90    4.60
  -4  -3   2  155.18    7.10
   4  -3  -2  153.38    8.00
  -4  -3   2  156.18    8.40
   4   3  -2  144.19    8.70
  -4   3   2  164.08    8.00
  -3  -3   2  244.28    9.10
  -3  -3   2  247.48    8.60
   3  -3  -2  235.98    8.90
   3   3  -2  248.18    9.60
  -3   3   2  248.78    8.90
   2  -3  -2   18.80    2.20
  -2  -3   2   18.60    2.60
  -2  -3   2   18.70    2.60
   2   3  -2   15.90    2.50
  -2   3   2   20.80    2.50
  -1  -3   2 2534.85   50.29
   1  -3  -2 2503.45   50.29
  -1  -3   2 2532.95   49.60
  -1   3   2 2503.45   50.29
   1   3  -2 2460.85   49.70
  -1   3   2 2583.84   50.19
   0  -3   2  241.58    5.20
   0  -3  -2  244.28    7.80
   0  -3  -2  243.38    6.80
   0  -3   2  255.67    6.30
   0  -3  -2  247.88    6.70
   0   3   2  240.18    6.70
   0   3  -2  246.08    6.20
   1  -3   2   24.50    1.30
  -1  -3  -2   23.50    1.90
  -1  -3  -2   22.50    2.60
   1  -3   2   22.30    1.90
   1   3   2   25.50    1.90
   1   3   2   21.60    2.70
  -1   3  -2   26.40    1.80
  -1   3  -2   24.80    1.20
   2  -3   2  279.37    8.80
  -2  -3  -2  285.57   10.10
  -2  -3  -2  285.27    8.20
  -2   3  -2  272.67    6.40
   2   3   2  286.67    8.10
   2   3   2  291.47   10.40
  -2   3  -2  284.67    8.60
   3  -3   2    2.90    2.40
  -3  -3  -2    7.80    1.90
  -3  -3  -2    8.90    2.90
  -3   3  -2    7.40    2.60
   3   3   2    1.60    2.50
   3   3   2    3.70    1.60
  -4  -3  -2  145.49    8.40
  -4  -3  -2  132.89    6.30
   4  -3   2  122.19    8.10
  -4   3  -2  134.39    7.40
   4   3   2  133.39    9.10
  -5  -3  -2   84.69    8.90
  -5  -3  -2   90.09    6.20
   5  -3   2   75.29    8.80
  -5   3  -2   79.19    7.80
   5   3   2   96.99    8.30
  -6  -3  -2   19.80    7.20
   6  -3   2   25.30    8.10
  -6  -3  -2   19.20    4.70
  -6   3  -2   24.10    6.10
  -6   3  -2   27.50    4.10
   6   3   2   24.70    6.50
  -7  -3  -2   13.70    5.60
   7  -3   2   19.90    9.50
  -7  -3  -2   31.20    8.10
  -7   3  -2    3.50    7.40
  -7   3  -2   18.90    5.10
   7   3   2   27.80   10.30
   8  -4  -2  -12.30   11.90
  -8  -4   2   15.20    8.20
  -8  -4   2   -3.10    6.70
   8   4  -2   -9.00   11.60
  -8   4   2   24.20    9.00
  -7  -4   2   37.50    8.50
  -7  -4   2   32.30    7.20
  -7   4   2   35.80    7.60
   7   4  -2   43.40   10.10
  -6  -4   2   26.70    5.60
  -6  -4   2   34.80    7.30
   6  -4  -2   19.00    6.00
   6   4  -2   34.70    7.90
  -6   4   2   35.20    6.50
   5  -4  -2    6.50    3.50
  -5  -4   2   11.70    3.70
  -5  -4   2   10.40    4.50
  -5   4   2   14.50    3.60
   5   4  -2   12.60    5.20
  -4  -4   2    5.20    3.00
   4  -4  -2    3.70    2.70
  -4  -4   2    0.70    2.50
   4   4  -2    4.90    3.80
  -4   4   2    1.90    1.90
  -3  -4   2    7.80    2.60
   3  -4  -2    7.20    2.40
  -3  -4   2    7.80    2.30
   3   4  -2    5.70    2.70
  -3   4   2    6.70    2.50
   2  -4  -2   79.09    4.30
  -2  -4   2   78.79    4.30
  -2  -4   2   77.09    4.50
   2   4  -2   80.39    4.60
  -2   4   2   83.29    4.40
  -1  -4   2  441.36   11.30
  -1  -4   2  442.86   10.70
   1  -4  -2  453.85   11.40
   1   4  -2  445.96   11.20
  -1   4   2  421.16   10.90
  -1   4   2  463.55   11.40
   1   4  -2  433.56   10.80
   0  -4  -2  492.45   12.10
   0  -4  -2  494.05   13.40
   0  -4  -2  491.85   12.00
   0  -4   2  493.15   11.50
   0   4   2  496.85   12.10
   0   4  -2  491.65   11.40
   1  -4   2   58.39    2.80
  -1  -4  -2   55.59    3.40
   1  -4   2   58.89    2.40
  -1  -4  -2   60.59    4.00
  -1   4  -2   60.99    2.70
   1   4   2   57.99    3.30
  -1   4  -2   57.39    2.40
   1   4   2   57.39    4.00
  -2  -4  -2  396.56   10.80
   2  -4   2  371.26   11.00
  -2  -4  -2  382.86   12.70
   2   4   2  400.56   10.80
  -2   4  -2  396.96    8.90
   2   4   2  395.76   13.10
  -2   4  -2  412.56   11.00
   3  -4   2   29.90    4.10
  -3  -4  -2   29.20    3.50
  -3  -4  -2   29.60    4.60
  -3   4  -2   31.20    3.30
   3   4   2   26.90    5.00
   3   4   2   32.20    3.20
  -3   4  -2   32.70    2.00
  -4  -4  -2    5.30    2.50
  -4  -4  -2   11.50    4.50
   4  -4   2    5.00    3.50
  -4   4  -2    3.00    3.10
   4   4   2    7.00    4.60
  -5  -4  -2   35.80    5.00
  -5  -4  -2   40.20    6.60
   5  -4   2   42.90    6.60
   5   4   2   45.40    8.10
  -5   4  -2   47.80    6.50
  -6  -4  -2   12.30    5.00
   6  -4   2   -0.80    6.00
  -6  -4  -2   12.70    4.30
   6   4   2   20.60    8.10
  -6   4  -2   10.20    6.10
  -7  -4  -2    8.70    5.70
  -7  -4  -2  -14.00    8.00
   7  -4   2   -5.70    6.40
  -7   4  -2    1.00    4.50
  -7   4  -2   -5.20    7.60
   7   4   2  -10.90    6.90
  -7  -5   2  -12.40    6.50
  -7  -5   2   -4.10    5.50
   7  -5  -2   -2.00    5.70
   7   5  -2   -6.30    6.10
  -7   5   2    8.20    6.20
  -6  -5   2    0.40    4.00
   6  -5  -2    1.30    3.90
  -6  -5   2    2.20    4.20
   6   5  -2   -7.70    5.60
  -6   5   2   -2.30    4.70
   5  -5  -2  138.29    9.70
  -5  -5   2  140.49    9.60
  -5  -5   2  123.89    8.20
   5   5  -2  113.29    8.70
  -5   5   2  132.59    8.40
  -4  -5   2   -0.90    1.90
   4  -5  -2    1.20    3.20
  -4  -5   2    1.70    2.10
  -4   5   2    3.60    3.00
   4   5  -2    2.40    3.20
  -3  -5   2    6.60    2.20
   3  -5  -2    5.00    2.10
  -3  -5   2    5.20    2.70
   3   5  -2    6.30    3.00
  -3   5   2    4.10    1.90
  -2  -5   2   81.39    4.60
  -2  -5   2   81.49    4.80
   2  -5  -2   84.09    4.70
   2   5  -2   77.29    4.80
  -2   5   2   87.29    4.70
  -2   5   2   83.19    4.00
   1  -5  -2 1073.59   23.50
   1  -5  -2 1071.29   23.80
  -1  -5   2 1078.29   23.20
  -1  -5   2 1060.19   23.70
  -1   5   2 1063.59   23.70
  -1   5   2 1086.89   23.70
   1   5  -2 1054.59   23.20
   1   5  -2 1087.79   23.80
   0  -5  -2    9.30    1.90
   0  -5  -2   11.30    2.00
   0  -5   2   10.10    1.70
   0  -5   2    9.20    1.60
   0  -5  -2    6.40    2.30
   0  -5   2   10.90    1.30
   0   5  -2   10.30    1.60
   0   5   2    9.20    1.90
   1  -5   2    0.80    0.80
  -1  -5  -2    0.30    1.50
   1  -5   2    0.10    1.00
  -1  -5  -2   -0.40    2.00
  -1   5  -2    1.30    0.80
  -1   5  -2    1.90    0.90
   1   5   2    1.10    2.20
   1   5   2    0.60    1.40
  -2  -5  -2  104.29    5.20
  -2  -5  -2   92.69    6.30
   2  -5   2   98.19    5.00
  -2   5  -2   99.79    3.60
   2   5   2   96.39    6.20
  -2   5  -2  108.19    4.60
   2   5   2  101.19    5.10
  -3  -5  -2    1.60    2.10
   3  -5   2    8.90    2.60
  -3  -5  -2    4.80    2.80
   3   5   2    5.80    2.20
  -3   5  -2    3.60    2.00
   3   5   2    6.80    3.70
  -3   5  -2    4.10    1.20
  -4  -5  -2   35.90    5.80
   4  -5   2   38.40    4.90
  -4  -5  -2   36.20    4.60
   4   5   2   41.50    6.80
  -4   5  -2   38.70    2.80
  -4   5  -2   46.20    5.10
  -5  -5  -2   72.79    9.40
  -5  -5  -2   79.49    7.00
   5  -5   2   79.19    8.70
  -5   5  -2   89.29    7.90
   5   5   2   81.29   10.10
   6  -5   2    0.60    4.80
  -6  -5  -2   -1.60    4.90
  -6  -5  -2    4.00    4.40
   6   5   2   10.00    7.90
  -6   5  -2   15.20    6.20
  -7  -5  -2   13.70    6.10
   7  -5   2   22.30    8.10
  -7  -5  -2    9.80    9.20
  -7   5  -2   16.60    5.10
   7   5   2   23.40   11.00
  -7   5  -2   24.80    8.10
  -7  -6   2    1.10    6.30
  -7  -6   2    2.70    7.10
   7  -6  -2   11.00    7.00
   7   6  -2    1.80    9.20
  -7   6   2   -3.40    6.70
   6  -6  -2   -4.40    3.90
  -6  -6   2    3.10    4.70
  -6  -6   2    3.20    5.80
   6   6  -2    2.90    5.80
  -6   6   2    2.30    4.40
  -5  -6   2    3.90    3.10
   5  -6  -2    0.00    4.40
  -5  -6   2   -2.10    3.70
  -5   6   2    7.00    4.30
   5   6  -2    6.30    4.60
   4  -6  -2    9.30    3.30
  -4  -6   2   12.30    4.00
  -4  -6   2   12.70    3.30
   4   6  -2   11.40    3.70
  -4   6   2   15.40    3.70
  -3  -6   2   12.90    3.40
   3  -6  -2   11.60    3.30
  -3  -6   2   12.30    3.20
  -3   6   2   14.70    2.60
  -3   6   2   15.50    3.30
   3   6  -2   15.70    3.60
   2  -6  -2  706.33   17.80
  -2  -6   2  714.63   18.00
  -2  -6   2  706.43   17.80
   2   6  -2  694.43   17.80
   2   6  -2  671.93   17.90
  -2   6   2  697.93   17.60
  -2   6   2  680.53   17.00
   1  -6  -2  106.69    4.90
   1  -6  -2   99.39    4.70
  -1  -6   2  100.39    4.60
  -1  -6   2  106.19    4.90
   1   6  -2  102.39    4.90
  -1   6   2  108.69    4.80
  -1   6   2   98.79    4.90
   1   6  -2  106.79    4.80
   0  -6   2   69.19    2.90
   0  -6  -2   65.39    3.80
   0  -6  -2   60.59    4.80
   0  -6  -2   61.29    3.60
   0  -6   2   69.59    3.60
   0  -6   2   72.79    3.80
   0   6  -2   61.39    3.60
   0   6   2   66.39    4.10
  -1  -6  -2   19.10    2.60
   1  -6   2   20.70    2.10
  -1  -6  -2   17.30    3.80
   1  -6   2   17.80    2.10
   1   6   2   19.70    3.90
  -1   6  -2   21.70    2.10
   1   6   2   20.00    2.50
  -1   6  -2   18.50    1.80
   2  -6   2   98.09    4.90
  -2  -6  -2   96.29    5.30
  -2  -6  -2   92.49    6.50
  -2   6  -2   94.69    4.70
   2   6   2   96.79    5.00
   2   6   2  101.19    7.20
  -2   6  -2   95.59    3.90
  -3  -6  -2   35.90    4.30
   3  -6   2   36.30    4.30
  -3  -6  -2   41.30    6.20
  -3   6  -2   42.80    3.80
   3   6   2   32.70    3.90
  -3   6  -2   39.40    2.70
   3   6   2   29.80    5.10
  -4  -6  -2   51.39    7.40
   4  -6   2   39.20    5.60
  -4  -6  -2   43.40    5.50
  -4   6  -2   39.40    3.10
   4   6   2   45.90    7.40
  -4   6  -2   41.80    4.40
   4   6   2   50.79    5.00
   5  -6   2   29.90    6.40
  -5  -6  -2   18.90    4.60
  -5  -6  -2   21.80    7.00
  -5   6  -2   15.30    4.70
  -5   6  -2   16.60    2.70
   5   6   2   21.60    7.70
   6  -6   2    6.90    6.40
  -6  -6  -2  -12.10    4.70
  -6  -6  -2    2.40    4.80
  -6   6  -2    0.00    2.50
   6   6   2    4.10    7.50
  -6   6  -2  -10.10    5.20
  -7  -6  -2   -2.40    6.30
  -7  -6  -2    7.80    7.90
   7  -6   2   16.50    9.50
   7   6   2   10.70   10.50
  -7   6  -2    2.30    5.30
  -7   6  -2   -3.80    3.40
  -7  -7   2   10.70    6.80
   7  -7  -2   16.20    7.30
  -7  -7   2   14.30    8.40
  -7   7   2   13.50    8.20
   7   7  -2   -9.70    9.20
   6  -7  -2    0.60    4.60
  -6  -7   2    7.40    5.60
  -6  -7   2   -0.80    6.10
   6   7  -2    1.20    5.00
  -6   7   2    7.10    5.90
   5  -7  -2   25.50    6.20
  -5  -7   2   32.60    5.70
  -5  -7   2   34.60    5.20
  -5   7   2   35.10    6.30
   5   7  -2   23.00    6.50
  -4  -7   2    5.00    3.50
  -4  -7   2    1.70    2.40
   4  -7  -2    7.80    3.80
   4   7  -2    2.40    3.90
  -4   7   2    2.00    2.30
  -4   7   2    2.50    3.40
   3  -7  -2    2.80    2.60
  -3  -7   2    5.00    2.30
  -3  -7   2    0.90    2.80
   3   7  -2    2.20    3.40
  -3   7   2    5.20    2.10
  -3   7   2    2.50    2.60
  -2  -7   2 1481.35   33.50
   2  -7  -2 1486.65   33.30
  -2  -7   2 1483.95   33.40
  -2   7   2 1487.25   33.10
   2   7  -2 1471.55   33.70
   2   7  -2 1470.55   33.30
  -2   7   2 1484.85   32.60
  -1  -7   2   61.49    4.10
   1  -7  -2   65.29    4.30
   1  -7  -2   65.99    4.40
  -1  -7   2   69.99    4.60
   1   7  -2   61.89    4.40
  -1   7   2   59.59    4.20
  -1   7   2   63.89    4.40
   1   7  -2   64.19    4.50
   0  -7  -2    3.50    2.50
   0  -7  -2   -2.30    1.60
   0  -7   2    1.60    1.10
   0  -7   2    0.30    1.50
   0  -7   2    0.50    1.50
   0  -7  -2    1.00    1.40
   0   7  -2    0.00    1.30
   0   7   2    0.90    1.30
  -1  -7  -2    9.00    2.50
  -1  -7  -2   10.30    3.60
   1  -7   2   10.10    1.70
   1  -7   2   10.40    1.90
  -1   7  -2   10.40    2.00
   1   7   2   12.40    3.80
   1   7   2   12.80    2.80
  -1   7  -2   11.30    1.80
  -2  -7  -2   25.70    4.80
   2  -7   2   24.20    3.10
  -2  -7  -2   24.80    3.70
   2  -7   2   25.60    2.50
  -2   7  -2   28.40    2.80
   2   7   2   20.60    3.40
   2   7   2   23.30    4.80
  -2   7  -2   19.90    2.50
   3  -7   2    9.60    3.10
  -3  -7  -2   14.90    3.40
  -3  -7  -2    1.20    4.00
   3   7   2    6.40    4.70
   3   7   2    9.40    2.80
  -3   7  -2    7.90    2.00
  -3   7  -2   12.80    2.70
   4  -7   2   21.10    4.20
  -4  -7  -2   21.70    4.60
  -4  -7  -2   26.80    6.50
  -4   7  -2   25.70    3.10
   4   7   2   19.50    6.60
   4   7   2   18.30    4.10
  -4   7  -2   22.90    4.00
   5  -7   2    6.40    4.90
  -5  -7  -2    3.70    3.10
  -5  -7  -2   11.10    6.40
   5   7   2    8.00    5.70
  -5   7  -2    0.10    3.80
  -5   7  -2    4.80    2.40
   6  -7   2    8.10    7.10
  -6  -7  -2    7.90    6.10
  -6  -7  -2    5.10    5.30
  -6   7  -2   11.70    3.00
  -6   7  -2    9.00    6.00
   6   7   2    9.00    9.70
  -7  -7  -2    6.90    7.30
   7  -7   2   16.20    9.60
  -7  -7  -2   15.00    7.30
   7   7   2    5.90   13.00
  -7   7  -2  -11.30    7.40
  -7   7  -2   -2.60    3.60
  -7  -8   2    1.10    8.90
  -7  -8   2    7.80    7.90
   7  -8  -2   -1.50    8.50
  -7   8   2   -8.90    5.50
   7   8  -2    0.70    7.40
  -7   8   2   -4.70    4.90
   6  -8  -2   -1.70    4.90
  -6  -8   2   -0.20    5.50
  -6  -8   2    1.70    4.20
   6   8  -2    1.20    5.60
  -6   8   2   -0.30    3.90
  -6   8   2   -8.60    6.00
   5  -8  -2    6.40    5.00
  -5  -8   2    2.00    4.60
  -5  -8   2    1.40    4.20
  -5   8   2    2.60    3.30
   5   8  -2    3.90    5.70
  -5   8   2    6.40    4.90
  -4  -8   2    7.90    4.50
  -4  -8   2   14.90    3.70
   4  -8  -2    2.20    3.80
   4   8  -2   16.10    5.20
  -4   8   2   10.30    3.80
  -4   8   2   14.80    3.30
  -3  -8   2   10.20    3.50
   3  -8  -2    3.20    2.80
  -3  -8   2    4.70    2.50
   3   8  -2   10.70    4.00
  -3   8   2    7.50    2.70
  -3   8   2    4.80    2.30
  -2  -8   2 1575.44   35.10
  -2  -8   2 1522.75   34.90
   2  -8  -2 1561.74   34.80
   2   8  -2 1541.95   35.20
  -2   8   2 1521.45   34.40
   2   8  -2 1516.65   34.80
  -2   8   2 1498.15   34.00
   1  -8  -2  125.39    6.20
  -1  -8   2  129.79    6.50
  -1  -8   2  124.99    6.00
   1  -8  -2  127.19    6.10
  -1   8   2  120.89    6.10
   1   8  -2  124.29    6.20
   1   8  -2  127.79    6.00
  -1   8   2  129.49    6.40
   0  -8   2   32.20    2.60
   0  -8   2   27.00    3.00
   0  -8  -2   26.50    3.60
   0  -8  -2   27.00    3.70
   0  -8  -2   37.50    4.90
   0  -8   2   27.50    3.50
   0   8  -2   27.90    3.20
   0   8   2   25.80    3.30
   1  -8   2   29.60    2.80
   1  -8   2   28.40    3.20
  -1  -8  -2   30.60    4.60
  -1  -8  -2   33.40    4.10
   1   8   2   28.00    3.60
  -1   8  -2   32.50    2.50
  -1   8  -2   25.70    2.90
   1   8   2   31.50    4.80
   2  -8   2   32.00    3.50
   2  -8   2   25.60    2.70
  -2  -8  -2   26.70    4.00
  -2  -8  -2   34.30    5.30
  -2   8  -2   29.40    2.90
   2   8   2   28.10    5.40
   2   8   2   28.70    4.00
  -2   8  -2   33.70    2.90
  -3  -8  -2    2.70    3.10
  -3  -8  -2    0.80    4.10
   3  -8   2    4.20    2.80
  -3   8  -2    2.70    1.70
  -3   8  -2    1.40    2.30
   3   8   2    4.80    2.90
   3   8   2    1.80    4.70
  -4  -8  -2   -0.40    2.40
  -4  -8  -2    3.10    5.30
   4  -8   2    2.30    4.30
  -4   8  -2   -1.70    2.10
   4   8   2   -5.30    5.30
  -4   8  -2    5.40    3.50
   4   8   2    4.90    3.70
  -5  -8  -2    1.20    6.40
  -5  -8  -2    0.90    3.90
   5  -8   2    1.30    4.00
  -5   8  -2   -3.10    2.10
   5   8   2    2.30    5.30
  -5   8  -2   -9.70    3.60
   6  -8   2   -7.40    6.50
  -6  -8  -2   -8.40    5.80
  -6  -8  -2   -3.10    4.80
  -6   8  -2   -6.80    5.90
   6   8   2  -11.80    6.30
  -6   8  -2    0.40    3.00
   7  -8   2    7.20   10.40
  -7  -8  -2   17.60    8.30
  -7  -8  -2   27.50   10.00
   7   8   2   10.10   13.60
  -7   8  -2    3.60    4.00
  -7   8  -2    4.40    8.80
  -7  -9   2   -1.50    6.00
  -7  -9   2   -6.50    9.80
   7  -9  -2   16.00    9.70
  -7   9   2    1.20    9.30
   7   9  -2   -2.30   12.20
  -7   9   2    3.60    5.40
   6  -9  -2   -9.20    6.40
  -6  -9   2   -1.00    6.00
  -6  -9   2    0.20    5.90
   6   9  -2  -13.10    5.50
  -6   9   2   -7.20    4.00
  -6   9   2    8.90    5.10
  -5  -9   2    9.10    5.10
   5  -9  -2   20.20    6.20
  -5  -9   2    7.20    4.90
  -5   9   2   11.20    3.50
   5   9  -2    5.80    5.80
  -5   9   2    9.40    5.30
  -4  -9   2   17.60    5.30
   4  -9  -2    3.40    3.60
  -4  -9   2    8.80    4.50
  -4   9   2   14.00    3.40
  -4   9   2   12.20    4.40
   4   9  -2   14.40    5.40
  -3  -9   2   20.90    3.80
  -3  -9   2   23.10    4.60
   3  -9  -2   19.20    4.20
   3   9  -2   20.80    3.80
  -3   9   2   27.00    3.60
  -3   9   2   25.40    4.00
   3   9  -2   26.60    5.40
   2  -9  -2   37.10    4.40
  -2  -9   2   26.00    4.10
  -2  -9   2   24.70    3.80
  -2   9   2   20.40    3.20
   2   9  -2   19.20    3.80
  -2   9   2   15.00    3.20
   2   9  -2   24.00    4.40
   1  -9  -2   31.60    4.20
   1  -9  -2   38.00    4.10
  -1  -9   2   35.30    4.50
  -1  -9   2   34.80    4.30
   1   9  -2   32.80    4.20
  -1   9   2   40.60    4.50
  -1   9   2   36.40    4.40
   0  -9  -2    4.30    2.70
   0  -9   2    4.30    1.60
   0  -9  -2    4.00    2.70
   0  -9  -2    6.60    2.90
   0  -9   2    6.20    2.70
   0  -9   2    8.50    2.40
   0   9   2    1.90    2.30
   0   9  -2    6.60    2.20
   1  -9   2    0.20    1.90
   1  -9   2    1.60    1.70
  -1  -9  -2   -0.20    1.90
  -1  -9  -2    5.50    3.60
  -1   9  -2    0.40    1.80
   1   9   2   -2.90    2.40
   1   9   2    4.20    3.80
  -1   9  -2   -1.30    1.40
   2  -9   2   50.29    4.20
   2  -9   2   35.30    3.30
  -2  -9  -2   49.70    6.70
  -2  -9  -2   42.00    5.20
  -2   9  -2   41.00    3.40
  -2   9  -2   45.80    3.80
   2   9   2   37.00    4.70
   2   9   2   47.40    7.10
  -3  -9  -2   25.30    5.60
   3  -9   2   20.50    4.20
  -3  -9  -2   13.20    3.50
   3   9   2   11.10    5.30
   3   9   2   16.30    4.20
  -3   9  -2   19.70    2.90
  -3   9  -2   15.50    3.30
   4  -9   2  100.49    8.50
  -4  -9  -2   96.59   10.50
  -4  -9  -2   95.49    7.90
  -4   9  -2  112.69    7.70
  -4   9  -2  107.49    5.90
   4   9   2  112.59    7.30
   4   9   2   84.39   11.40
  -5  -9  -2   32.00    5.80
   5  -9   2   17.70    5.50
  -5  -9  -2   22.70    8.00
  -5   9  -2   21.20    5.30
   5   9   2   15.60    8.60
  -5   9  -2   15.10    3.50
   6  -9   2    3.00    5.50
  -6  -9  -2  -10.60    5.30
  -6   9  -2   -1.20    6.00
  -6   9  -2   -3.90    3.40
   6   9   2    4.80   10.70
   7 -10  -2    6.40    9.60
  -7 -10   2   -2.10    8.70
  -7 -10   2   15.20    9.10
   7  10  -2    7.20   12.90
  -7  10   2    9.00    6.20
  -7  10   2    5.40    7.40
  -6 -10   2   11.70    6.70
   6 -10  -2   10.60    8.00
  -6 -10   2    0.40    6.40
  -6  10   2   14.50    5.30
   6  10  -2    9.30    8.30
  -6  10   2   -0.90    6.80
  -5 -10   2   -3.40    4.90
   5 -10  -2    6.60    5.90
  -5 -10   2   -2.30    4.80
  -5  10   2   -7.70    4.50
  -5  10   2    2.20    3.90
   5  10  -2    4.30    6.30
  -4 -10   2   -1.90    3.90
   4 -10  -2    3.10    4.70
  -4 -10   2    0.00    4.30
   4  10  -2    1.90    5.40
  -4  10   2    5.80    3.60
  -3 -10   2   44.40    6.40
  -3 -10   2   53.39    6.40
   3 -10  -2   46.60    4.80
  -3  10   2   45.00    4.90
  -3  10   2   63.39    5.50
   3  10  -2   55.89    7.10
   3  10  -2   41.70    5.10
   2 -10  -2   31.00    4.50
  -2 -10   2   31.20    4.60
  -2 -10   2   24.00    4.60
   2  10  -2   34.70    5.70
  -2  10   2   26.30    3.90
   2  10  -2   27.10    4.60
  -2  10   2   31.70    4.50
   1 -10  -2   51.69    4.80
   1 -10  -2   50.29    4.30
  -1 -10   2   48.60    3.80
  -1 -10   2   47.90    5.00
  -1 -10   2   48.80    4.60
   1  10  -2   51.59    4.60
  -1  10   2   49.40    4.60
   0 -10   2   43.80    3.50
   0 -10   2   44.00    4.80
   0 -10   2   41.70    4.60
   0 -10  -2   33.30    4.40
   0 -10  -2   42.40    4.30
   0 -10  -2   44.30    6.40
   0  10   2   41.70    5.00
   0  10  -2   39.20    4.40
  -1 -10  -2    6.80    4.30
   1 -10   2    4.40    2.20
  -1 -10  -2    7.10    3.30
   1 -10   2    8.00    2.30
  -1  10  -2    7.20    2.10
   1  10   2    6.60    2.80
  -1  10  -2    3.60    2.30
   2 -10   2   -2.70    2.20
  -2 -10  -2   -1.80    2.90
  -2 -10  -2   -1.60    4.10
   2 -10   2    0.00    2.10
  -2  10  -2    1.10    2.20
   2  10   2    0.00    2.90
   2  10   2    3.00    4.60
  -2  10  -2    0.20    1.90
  -3 -10  -2   10.50    3.90
  -3 -10  -2   24.50    5.70
   3 -10   2   19.30    4.50
   3  10   2   26.30    6.00
   3  10   2   24.00    4.40
  -3  10  -2   16.70    3.50
  -3  10  -2   15.80    2.90
   4 -10   2   61.59    7.60
  -4 -10  -2   58.89    7.40
  -4 -10  -2   49.20    8.10
   4  10   2   46.80    8.80
   4  10   2   66.49    7.50
  -4  10  -2   52.69    4.90
  -4  10  -2   51.29    6.30
  -5 -10  -2   -4.60    5.00
  -5 -10  -2   -1.60    5.70
   5 -10   2    2.70    5.30
  -5  10  -2    5.20    3.30
  -5  10  -2    9.50    5.50
   5  10   2  -18.50    8.50
   6 -10   2   -2.50    7.40
  -6 -10  -2   -3.00    5.90
  -6 -10  -2    5.70    9.50
   6  10   2   -5.90   10.60
  -6  10  -2   -0.80    7.00
  -6  10  -2   -1.50    3.60
  -6 -11   2    5.50    7.80
   6 -11  -2   -4.90    7.30
  -6 -11   2    3.40    6.80
  -6  11   2   10.50    6.30
  -6  11   2   -2.80    6.60
   6  11  -2   16.40    9.70
  -5 -11   2   20.60    6.30
   5 -11  -2   22.40    5.70
  -5 -11   2   20.10    7.10
  -5  11   2   26.10    5.70
  -5  11   2   18.00    4.80
   5  11  -2   15.40    8.30
   4 -11  -2    3.10    4.60
  -4 -11   2   -1.20    3.70
  -4 -11   2    8.20    5.80
   4  11  -2    3.40    5.70
  -4  11   2    8.10    4.50
  -4  11   2   -1.20    3.40
  -3 -11   2    8.10    4.70
  -3 -11   2    2.80    3.20
   3 -11  -2    9.30    4.00
  -3  11   2   12.00    4.30
   3  11  -2    1.40    4.00
   3  11  -2    3.20    4.80
  -3  11   2    6.00    2.80
  -2 -11   2   16.20    4.10
   2 -11  -2   10.80    4.00
  -2 -11   2   15.50    4.40
  -2  11   2    8.50    3.70
   2  11  -2   15.20    4.40
   2  11  -2   13.00    3.90
  -2  11   2   11.70    3.20
  -1 -11   2  107.19    7.00
   1 -11  -2   94.69    6.20
   1 -11  -2   91.39    8.40
   1 -11  -2   95.19    5.80
  -1 -11   2   89.79    6.50
  -1 -11   2   93.89    5.40
   1  11  -2   86.59    6.00
  -1  11   2   96.69    6.60
   0 -11   2   -1.50    1.80
   0 -11  -2   -0.90    2.80
   0 -11   2   -0.60    2.80
   0 -11   2    4.00    2.60
   0 -11  -2    0.70    2.20
   0 -11  -2    1.90    3.90
   0  11  -2    1.60    2.60
   0  11   2    0.80    3.10
  -1 -11  -2   -1.80    2.10
   1 -11   2    4.30    2.40
  -1 -11  -2    3.40    2.30
   1 -11   2   -1.30    2.20
  -1 -11  -2    2.40    3.30
  -1  11  -2    2.80    2.40
   1  11   2    2.30    3.10
   2 -11   2    6.50    2.50
   2 -11   2    7.80    2.90
  -2 -11  -2    1.50    2.60
  -2 -11  -2   14.70    5.30
   2  11   2    9.70    4.70
   2  11   2    7.90    3.20
  -2  11  -2    4.90    2.90
  -2  11  -2    5.10    2.40
  -3 -11  -2    4.10    4.00
   3 -11   2    7.40    3.60
  -3 -11  -2    4.90    5.30
  -3  11  -2    7.10    3.30
  -3  11  -2    6.90    3.00
   3  11   2    7.50    3.30
   3  11   2   -1.40    5.70
   4 -11   2   56.69    7.60
  -4 -11  -2   63.19    9.90
  -4 -11  -2   55.99    7.00
   4  11   2   56.49    6.60
   4  11   2   67.39    9.00
  -4  11  -2   56.29    6.70
  -4  11  -2   50.39    5.40
   5 -11   2    4.70    6.20
  -5 -11  -2   -8.60    5.20
  -5 -11  -2   -5.30    7.90
   5  11   2   -4.60    3.70
  -5  11  -2   -0.20    5.30
   5  11   2    5.70    7.20
  -5  11  -2    2.30    3.50
  -6 -11  -2   -1.60    6.60
  -6 -11  -2    4.80    8.80
   6 -11   2   16.70    8.80
  -6  11  -2   12.20    4.60
  -6  11  -2   -0.20    7.20
   6  11   2   -4.00   13.10
   6 -12  -2    1.80    9.20
  -6 -12   2  -10.70    7.10
  -6 -12   2    4.00    8.60
  -6  12   2    9.90    5.80
   6  12  -2   14.00   12.10
  -6  12   2    6.40    5.40
  -5 -12   2   12.70    7.50
  -5 -12   2   10.60    7.10
   5 -12  -2   -8.80    6.40
  -5  12   2   -6.80    4.30
  -5  12   2    9.50    5.90
   5  12  -2    0.00    8.20
  -4 -12   2    9.80    6.00
  -4 -12   2   23.70    6.10
   4 -12  -2    6.50    5.20
   4  12  -2   15.80    6.30
  -4  12   2   13.10    4.80
  -4  12   2    9.00    4.10
  -3 -12   2  223.48   11.90
   3 -12  -2  213.78   10.80
  -3 -12   2  226.48   12.10
  -3  12   2  225.48   11.00
  -3  12   2  232.28   10.80
   3  12  -2  216.98   12.70
   3  12  -2  214.48   11.70
   2 -12  -2   16.10    3.90
  -2 -12   2   16.90    4.70
   2 -12  -2   13.60    4.50
  -2 -12   2   12.70    4.40
   2  12  -2   13.10    3.60
   2  12  -2   16.30    5.20
  -2  12   2   18.90    4.70
  -2  12   2   14.80    4.30
  -1 -12   2    6.30    3.30
  -1 -12   2    3.10    2.60
   1 -12  -2    7.80    2.70
   1 -12  -2   -1.00    4.20
   1 -12  -2   -2.10    3.00
  -1 -12   2    0.50    3.30
  -1  12   2    6.50    3.30
   1  12  -2    3.30    2.60
   0 -12  -2   37.10    6.20
   0 -12   2   46.50    6.10
   0 -12   2   36.60    4.00
   0 -12  -2   40.40    5.40
   0 -12  -2   38.20    5.30
   0 -12   2   49.20    5.50
   0  12   2   53.49    6.30
   0  12  -2   34.80    4.30
  -1 -12  -2   -7.30    2.90
  -1 -12  -2    2.50    4.80
  -1 -12  -2   -1.30    2.70
   1 -12   2   -1.70    3.60
   1 -12   2    0.50    2.50
   1 -12   2   -1.20    2.50
   1  12   2   -1.50    3.00
  -1  12  -2   -0.40    2.60
  -2 -12  -2    6.60    3.20
   2 -12   2    2.30    2.70
   2 -12   2    1.50    2.80
  -2 -12  -2   10.50    5.60
  -2  12  -2    6.00    3.30
   2  12   2    0.00    5.90
  -2  12  -2    4.40    2.80
   2  12   2    5.50    2.90
  -3 -12  -2   -2.70    6.30
   3 -12   2   16.30    4.60
  -3 -12  -2   17.40    5.40
   3  12   2   14.20    4.20
   3  12   2    7.20    7.40
  -3  12  -2   15.30    3.80
  -3  12  -2   17.50    4.00
   4 -12   2   16.80    5.90
  -4 -12  -2   10.80    5.80
  -4 -12  -2    1.70    5.00
   4  12   2   22.30    5.10
  -4  12  -2    9.30    4.60
   4  12   2   -3.20    7.90
  -4  12  -2    6.20    3.80
  -5 -12  -2   -7.80    5.80
  -5 -12  -2    8.50    6.50
   5 -12   2   -6.30    6.20
   5  12   2   -2.40   10.20
   5  12   2   -7.20    5.60
  -5  12  -2   -2.90    5.30
  -5  12  -2   -2.60    3.60
  -6 -12  -2    1.90   11.00
   6 -12   2    7.80    8.10
  -6 -12  -2    0.50    7.00
  -6  12  -2   13.00    4.80
  -6  12  -2   -6.00    7.40
   6  12   2   25.20   13.70
   6 -13  -2   10.90    7.40
  -6 -13   2   -3.10    9.30
  -6 -13   2  -15.40    9.10
  -6  13   2   -4.60    6.20
  -6  13   2   -2.80    8.20
   6  13  -2  -23.80   11.50
  -5 -13   2    1.00    5.20
  -5 -13   2   -2.00    7.10
   5 -13  -2   -3.40    6.60
  -5  13   2  -12.30    6.30
   5  13  -2   13.80    8.40
   4 -13  -2   16.30    5.10
  -4 -13   2   17.30    7.00
  -4 -13   2    5.40    6.20
   4  13  -2   10.10    7.50
  -4  13   2   21.90    6.20
  -4  13   2   15.40    5.60
  -3 -13   2    7.10    4.10
   3 -13  -2    3.90    3.80
  -3 -13   2    0.40    4.70
   3  13  -2   10.10    4.40
   3  13  -2   14.10    6.70
  -3  13   2    8.40    4.80
  -3  13   2    8.50    4.30
  -2 -13   2   26.80    4.80
   2 -13  -2   27.60    5.60
  -2 -13   2   20.50    5.30
   2 -13  -2   25.70    4.80
  -2  13   2   21.80    5.30
  -2  13   2   18.40    4.00
   2  13  -2   25.50    4.50
   1 -13  -2   -3.10    3.00
   1 -13  -2   -3.80    3.90
  -1 -13   2    5.90    3.30
   1 -13  -2    2.00    2.50
  -1 -13   2    2.30    2.80
  -1 -13   2   -0.40    3.90
  -1  13   2    1.50    2.90
   1  13  -2    0.10    2.80
   0 -13   2   28.60    4.10
   0 -13  -2   28.30    6.90
   0 -13  -2   26.80    4.60
   0 -13   2   34.40    5.20
   0 -13   2   35.50    5.90
   0 -13  -2   29.40    4.70
   0  13   2   27.00    5.30
   0  13  -2   29.20    5.20
   1 -13   2   12.10    4.80
  -1 -13  -2   25.20    6.70
   1 -13   2   16.00    3.50
  -1 -13  -2    7.90    4.50
  -1 -13  -2   16.60    4.70
   1 -13   2    7.90    3.50
   1  13   2    8.60    3.70
  -1  13  -2   10.20    3.90
   2 -13   2    4.10    3.20
   2 -13   2    2.00    2.90
  -2 -13  -2    1.50    5.40
  -2 -13  -2   -4.50    3.90
  -2  13  -2    0.50    3.40
   2  13   2    4.60    4.40
  -2  13  -2   -2.50    2.80
   3 -13   2   94.79    8.30
  -3 -13  -2   76.29   10.70
  -3 -13  -2   79.09    9.50
  -3  13  -2   84.49    6.80
   3  13   2   71.99    7.30
   3  13   2  129.59   13.10
  -3  13  -2   78.09    7.00
   4 -13   2    4.10    5.70
  -4 -13  -2    4.10    8.20
  -4 -13  -2    9.50    6.60
   4  13   2    4.20    5.50
   4  13   2   -8.20    9.30
  -4  13  -2    6.90    4.20
  -4  13  -2    0.40    4.60
  -5 -13  -2   -9.50   10.00
   5 -13   2   -6.40    7.20
  -5 -13  -2   18.60    7.40
   5  13   2   12.20   11.30
   5  13   2  -12.70    6.50
  -5  13  -2    2.20    4.50
  -5  13  -2   -5.00    6.00
  -5 -14   2    6.40    8.00
   5 -14  -2    0.30    7.10
  -5 -14   2   10.80    8.10
  -5  14   2    1.50    6.40
  -5  14   2   -5.30    5.30
   5  14  -2    2.10   10.20
  -4 -14   2   14.10    7.40
  -4 -14   2    1.70    5.30
   4 -14  -2    8.70    6.80
   4  14  -2    8.00    8.40
  -4  14   2    4.80    5.50
  -4  14   2    7.20    5.90
   3 -14  -2   -5.00    3.70
  -3 -14   2    2.40    6.00
  -3 -14   2    9.60    5.60
   3  14  -2   -3.50    3.90
  -3  14   2    3.00    4.60
   3  14  -2   -7.20    6.40
  -3  14   2   -2.70    4.70
   2 -14  -2   12.30    4.70
  -2 -14   2    9.70    5.10
  -2 -14   2    3.20    5.20
  -2 -14   2   16.10    4.30
   2 -14  -2   12.70    4.50
  -2  14   2    6.00    4.40
   2  14  -2    8.20    4.10
   1 -14  -2   -1.10    5.50
  -1 -14   2    0.10    3.10
  -1 -14   2    1.60    4.70
  -1 -14   2    7.80    3.70
   1 -14  -2   -1.00    3.70
   1 -14  -2    1.40    4.10
  -1  14   2    4.90    4.40
   1  14  -2    0.30    4.20
   0 -14   2   14.50    3.50
   0 -14   2   11.10    4.40
   0 -14  -2    4.20    4.40
   0 -14  -2    1.80    5.90
   0 -14  -2    5.90    4.80
   0 -14   2   12.20    4.80
   0  14   2    9.20    4.80
   0  14  -2   10.80    4.40
  -1 -14  -2    2.20    5.00
  -1 -14  -2    2.40    4.30
   1 -14   2   -6.60    4.60
   1 -14   2    3.80    4.00
   1 -14   2   -0.80    3.10
  -1 -14  -2    2.00    3.30
   1  14   2   -6.80    4.20
  -1  14  -2    1.50    3.80
  -2 -14  -2    1.90    5.40
  -2 -14  -2    9.30    7.20
   2 -14   2    4.90    3.90
  -2 -14  -2    7.80    3.60
   2 -14   2    7.80    3.80
   2  14   2    0.70    3.80
  -2  14  -2    7.80    4.00
  -3 -14  -2   51.49    8.30
   3 -14   2   72.29    7.90
  -3 -14  -2   65.49   10.20
  -3  14  -2   53.09    6.60
   3  14   2   57.69   10.90
  -3  14  -2   49.80    6.60
   3  14   2   66.99    8.80
   4 -14   2    8.90    6.30
  -4 -14  -2   -1.40    9.00
  -4 -14  -2   -1.20    6.50
   4  14   2   -0.90    6.10
   4  14   2   -8.60    9.70
  -4  14  -2   -2.90    5.00
  -4  14  -2   -3.60    4.50
  -5 -14  -2   -0.90   10.80
   5 -14   2    9.20    7.70
  -5 -14  -2   13.20    8.70
  -5  14  -2   -8.60    5.10
   5  14   2  -26.00   13.00
   5  14   2  -10.70    7.10
  -5  14  -2   -8.00    6.40
   5 -15  -2   16.30    9.20
  -5 -15   2    9.00    9.80
  -5 -15   2    0.30    9.40
  -5  15   2   11.00    8.90
  -5  15   2   -0.40    6.90
   5  15  -2    4.10   12.30
  -4 -15   2   13.00    7.70
   4 -15  -2   19.80    7.60
  -4 -15   2   27.00    8.90
  -4  15   2   10.40    6.30
   4  15  -2   30.80   10.30
  -4  15   2   23.00    6.50
   3 -15  -2   10.00    4.90
  -3 -15   2    3.60    6.50
  -3 -15   2   13.00    6.70
  -3  15   2    9.80    5.30
   3  15  -2    3.20    5.00
  -3  15   2    6.40    5.70
   2 -15  -2    1.10    4.60
  -2 -15   2    7.90    5.80
   2 -15  -2    2.20    4.60
  -2 -15   2   10.40    5.60
   2 -15  -2    5.20    7.40
  -2 -15   2    4.60    4.20
  -2  15   2   -4.70    4.40
   2  15  -2    7.30    5.40
  -1 -15   2   -5.30    5.00
  -1 -15   2   -1.80    3.50
  -1 -15   2    7.50    4.90
   1 -15  -2   -8.10    3.70
   1 -15  -2    2.40    4.50
   1 -15  -2    4.90    6.70
   1  15  -2   -0.40    5.30
  -1  15   2   10.30    5.40
   0 -15   2   21.20    5.60
   0 -15  -2   16.40    4.60
   0 -15   2   14.60    6.10
   0 -15  -2   14.60    6.90
   0 -15  -2   14.50    5.40
   0 -15   2   20.40    4.40
   0  15  -2   14.80    4.90
   0  15   2   23.90    5.30
  -1 -15  -2   -4.50    4.10
  -1 -15  -2    0.90    4.40
   1 -15   2   -0.10    4.00
   1 -15   2   -1.70    3.40
  -1 -15  -2   22.60    7.90
   1 -15   2    0.30    5.50
  -1  15  -2   -3.30    4.30
   1  15   2    9.50    4.30
  -2 -15  -2    3.10    7.80
  -2 -15  -2   -4.30    4.80
   2 -15   2   -2.70    3.80
  -2 -15  -2    6.60    5.80
   2 -15   2    8.10    4.20
   2  15   2    7.90    5.60
  -2  15  -2    1.70    4.20
   3 -15   2   59.49    8.00
  -3 -15  -2   80.49   11.50
  -3 -15  -2   58.09    9.30
  -3  15  -2   65.29    8.20
   3  15   2   64.09    9.50
  -3  15  -2   78.09    8.60
   3  15   2   65.49   11.80
  -4 -15  -2   15.60    6.70
  -4 -15  -2  -18.80    9.70
   4 -15   2   14.80    7.00
  -4  15  -2   -3.10    5.10
   4  15   2   -5.60    4.80
   4  15   2   24.00   12.90
  -4  15  -2    4.60    5.50
  -4 -16   2   24.40    9.40
  -4 -16   2   22.60    9.60
   4 -16  -2   48.10    9.40
  -4  16   2   32.10    8.40
  -4  16   2   27.30    7.30
   4  16  -2   23.90   11.30
  -3 -16   2    6.80    5.10
  -3 -16   2   -0.30    7.60
   3 -16  -2   -3.90    5.20
  -3  16   2    9.10    6.10
   3  16  -2   -3.00    5.30
  -3  16   2    2.00    5.50
  -2 -16   2   -3.10    4.40
  -2 -16   2    5.70    6.30
   2 -16  -2    6.90    5.20
   2 -16  -2    4.30    5.60
  -2 -16   2    7.20    5.90
   2 -16  -2   -3.90    6.90
   2  16  -2    1.60    6.10
  -2  16   2    6.80    4.80
  -1 -16   2   -6.60    6.30
  -1 -16   2   15.30    5.90
  -1 -16   2   -0.10    4.20
   1 -16  -2   -4.00    4.90
   1 -16  -2   -4.80    4.70
   1 -16  -2   -5.60    7.60
  -1  16   2   10.70    6.40
   1  16  -2    1.40    4.30
   0 -16  -2    5.50    6.60
   0 -16  -2    1.40    5.00
   0 -16  -2    6.80    5.50
   0 -16   2    8.80    6.80
   0 -16   2   -7.60    4.80
   0 -16   2    7.10    4.00
   0  16  -2    9.70    5.50
   0  16   2   -1.40    3.90
   1 -16   2   -8.40    4.60
   1 -16   2    3.40    6.80
  -1 -16  -2   -4.40    5.80
   1 -16   2   -4.50    4.10
  -1 -16  -2   -3.20    6.70
  -1 -16  -2   -0.40    4.40
   1  16   2   -4.40    4.30
  -1  16  -2    3.80    5.30
   2 -16   2   22.30    5.50
   2 -16   2   23.80    7.90
  -2 -16  -2   22.20    6.20
  -2 -16  -2   32.30    9.30
  -2 -16  -2   21.30    6.80
   2 -16   2   26.20    5.70
  -2  16  -2   21.40    6.20
   2  16   2   12.40    6.10
  -3 -16  -2    7.50    8.50
   3 -16   2   -2.30    5.90
  -3 -16  -2   10.30    7.80
  -3  16  -2   -2.80    5.00
   3  16   2   -2.60    5.40
  -3  16  -2  -12.50    4.90
  -4 -16  -2   -6.10    5.90
  -4 -16  -2  -11.30   11.30
   4 -16   2   -8.10    7.10
   4  16   2    3.20    6.10
  -4  16  -2   11.50    6.40
  -4  16  -2    8.80    6.00
   4  16   2   27.50   12.10
  -3 -17   2   17.00    6.80
  -3 -17   2    9.40    8.90
  -3 -17   2   10.40    7.10
   3 -17  -2   19.30    7.30
   3  17  -2    8.60    5.90
  -3  17   2   17.90    7.80
   2 -17  -2   -1.10    4.30
  -2 -17   2    8.80    5.60
   2 -17  -2   -9.30    8.40
   2 -17  -2   -3.90    5.60
  -2 -17   2  -10.40    5.00
  -2 -17   2   14.20    7.50
  -2  17   2   10.30    7.20
   2  17  -2   -1.70    6.80
  -1 -17   2    1.80    4.60
   1 -17  -2    1.90    5.80
  -1 -17   2   -0.20    6.70
   1 -17  -2    2.00    8.50
  -1 -17   2  -10.50    6.40
   1 -17  -2   -0.70    5.70
   1  17  -2   -2.00    6.30
  -1  17   2    4.90    6.70
   0 -17   2    2.80    4.70
   0 -17  -2    2.10    7.40
   0 -17  -2  -10.30    4.20
   0 -17  -2    3.30    5.40
   0 -17   2    8.50    7.50
   0 -17   2   -1.60    5.40
   0  17   2    7.70    5.30
   0  17  -2    7.80    6.10
   1 -17   2   10.60    7.40
  -1 -17  -2   -6.10    6.20
  -1 -17  -2   16.10    9.10
   1 -17   2    9.20    5.70
  -1 -17  -2   -1.40    5.30
   1 -17   2   -1.30    4.90
  -1  17  -2  -11.10    5.50
   1  17   2    2.80    6.90
   2 -17   2   -0.90    5.00
  -2 -17  -2    0.90    7.90
  -2 -17  -2   11.10    6.30
   2 -17   2    2.40    8.20
  -2 -17  -2   10.50    6.00
   2 -17   2    5.50    5.30
  -2  17  -2    1.70    6.20
   2  17   2    0.40    7.00
   3 -17   2    9.40    7.20
  -3 -17  -2   -3.10    7.10
  -3 -17  -2   -2.10    8.00
  -3 -17  -2   -9.60    9.40
   3  17   2   14.50    8.10
  -3  17  -2    5.20    6.50
  -2 -18   2  -12.30    6.20
   2 -18  -2    2.70    7.60
  -2 -18   2    8.50    6.00
   2 -18  -2   16.70   10.70
  -2 -18   2  -18.40    7.40
   2  18  -2   -0.70    5.80
  -2  18   2   -7.50    7.70
  -1 -18   2   -7.60    7.90
   1 -18  -2   14.00    7.50
  -1 -18   2   22.40    7.70
   1 -18  -2    0.50    9.70
   1 -18  -2    2.60    6.70
  -1 -18   2   12.70    5.90
   1  18  -2   -9.20    6.70
  -1  18   2    5.50    7.20
   0 -18  -2   15.90    7.00
   0 -18   2    8.20    6.70
   0 -18   2   -2.50    5.60
   0 -18  -2  -12.50    9.00
   0 -18   2    2.30    8.40
   0 -18  -2    1.90    6.60
   0  18   2   -5.80    6.80
   0  18  -2    3.10    6.80
  -1 -18  -2    1.10    7.10
  -1 -18  -2    6.40    6.10
  -1 -18  -2   12.90    9.30
   1 -18   2    5.80    5.80
   1 -18   2   12.10    6.50
   1 -18   2   16.40    8.00
  -1  18  -2    9.90    6.40
   1  18   2    4.90    7.10
  -2 -18  -2   23.50    9.10
   2 -18   2   10.10    9.70
   2 -18   2   35.80    6.80
  -2 -18  -2   20.00    8.80
   2 -18   2   29.80    7.30
  -2 -18  -2   17.80   10.90
  -2  18  -2   42.80    7.80
   2  18   2   17.20    8.00
   0 -19   2   24.00    8.60
   0 -19  -2   -9.90   11.50
   0 -19   2   -7.20    6.60
   0 -19   2    2.60    9.60
   0 -19  -2   -6.30    5.20
   0 -19  -2   -8.80    6.90
   0  19  -2   -9.70    8.10
   0  19   2    5.40    8.80
   8   0  -3    3.30    8.40
  -8   0   3   -3.40    6.80
  -8   0   3    1.40    8.80
  -7   0   3   42.90    8.50
   7   0  -3   44.90    8.60
  -6   0   3    7.50    5.00
   6   0  -3   -3.70    4.80
  -5   0   3   22.20    4.50
   5   0  -3   18.70    5.30
  -4   0   3   -2.10    1.70
   4   0  -3    1.20    2.80
  -3   0   3  108.19    5.30
   3   0  -3   97.29    5.40
  -2   0   3    0.50    1.00
   2   0  -3   -1.80    1.20
   1   0  -3   50.09    2.40
  -1   0   3   52.29    2.40
   0   0   3    0.70    1.00
   0   0  -3   -0.50    0.80
   1   0   3   63.69    3.60
   1   0   3   63.09    2.10
  -1   0  -3   61.99    3.50
  -2   0  -3   -0.30    1.60
  -2   0  -3    0.20    0.60
   2   0   3    1.70    1.80
   3   0   3   92.89    6.60
  -3   0  -3  102.89    6.30
  -3   0  -3   93.09    3.70
   4   0   3   -0.90    3.70
  -4   0  -3   -0.60    1.50
  -4   0  -3    2.00    2.30
  -5   0  -3    1.20    2.10
  -5   0  -3   -0.70    4.60
   5   0   3    2.50    5.20
   6   0   3    9.80    7.30
  -6   0  -3    5.90    6.10
  -6   0  -3    4.60    3.30
   7   0   3    8.40    9.50
  -7   0  -3   20.00    7.30
  -7   0  -3   10.30    4.60
   8  -1  -3  -14.40   10.80
  -8  -1   3    9.30    7.50
  -8  -1   3  -16.10    8.40
   8   1  -3   -0.20   10.90
  -8   1   3   -4.20    8.00
  -7  -1   3   32.50    6.20
  -7  -1   3   27.50    7.80
   7  -1  -3   25.50    9.20
  -7   1   3   46.40    7.60
   7   1  -3   28.70    9.60
   6  -1  -3   18.10    4.70
  -6  -1   3   18.10    5.20
   6   1  -3    6.80    6.10
  -6   1   3   19.80    5.70
  -5  -1   3    6.40    3.80
   5  -1  -3   -3.50    3.70
   5   1  -3   -1.70    3.70
  -5   1   3    2.10    2.70
   4  -1  -3   89.29    6.10
  -4  -1   3   84.19    5.60
   4   1  -3   72.69    5.60
  -4   1   3   73.29    5.70
  -3  -1   3  422.66   12.30
   3  -1  -3  399.56   12.40
  -3   1   3  410.56   12.10
   3   1  -3  409.36   12.50
   2  -1  -3   29.70    2.70
  -2  -1   3   31.30    2.60
  -2   1   3   28.50    2.50
   2   1  -3   31.20    2.80
   1  -1  -3  530.55   11.90
  -1  -1   3  511.95   11.20
   1   1  -3  492.65   11.20
  -1   1   3  511.55   11.80
   0  -1  -3    2.80    1.30
   0  -1   3    1.80    0.90
   0   1   3    3.30    1.50
  -1  -1  -3  334.37    9.70
   1  -1   3  320.77    6.70
  -1  -1  -3  334.67    7.70
   1  -1   3  330.77    8.90
   1   1   3  331.57    7.80
   1   1   3  329.07    9.70
  -1   1  -3  330.97    8.80
  -2  -1  -3  159.08    4.80
  -2  -1  -3  148.99    6.90
   2  -1   3  154.18    6.70
  -2   1  -3  156.58    3.70
  -2   1  -3  157.48    6.40
   2   1   3  157.88    4.70
   2   1   3  159.48    7.00
   3  -1   3  744.93   20.50
  -3  -1  -3  760.62   20.80
  -3  -1  -3  772.22   17.10
   3   1   3  745.83   21.10
  -3   1  -3  783.22   20.40
  -3   1  -3  748.33   16.10
  -4  -1  -3   17.10    2.60
  -4  -1  -3   19.10    4.50
   4  -1   3   20.70    5.20
  -4   1  -3   14.10    2.00
  -4   1  -3   18.70    4.40
   4   1   3   17.30    5.00
  -5  -1  -3   28.00    6.00
  -5  -1  -3   26.90    3.60
   5  -1   3   30.80    6.10
  -5   1  -3   21.50    5.80
  -5   1  -3   27.60    3.20
   5   1   3   33.90    6.70
  -6  -1  -3    1.50    3.20
  -6  -1  -3   -3.90    5.70
   6  -1   3    9.20    5.40
  -6   1  -3    0.00    2.90
  -6   1  -3   -4.60    5.70
   6   1   3   -0.70    7.00
   7  -1   3   -1.40    6.80
  -7  -1  -3    3.00    9.10
  -7  -1  -3    7.60    5.00
  -7   1  -3    5.60    4.60
   7   1   3   -4.00    8.90
  -7   1  -3    0.10    8.50
  -8  -2   3    0.30    8.80
  -8  -2   3   -5.80    6.00
   8  -2  -3   19.90   11.70
  -8   2   3    3.40    6.40
   8   2  -3   -3.70   11.50
   7  -2  -3    7.00    5.70
  -7  -2   3   10.30    5.70
  -7  -2   3   -1.40    5.10
   7   2  -3   14.10    6.80
  -7   2   3    6.00    6.60
   6  -2  -3    8.50    5.30
  -6  -2   3   14.30    5.40
  -6   2   3   -0.80    4.40
   6   2  -3    2.10    5.70
   5  -2  -3   11.10    4.50
  -5  -2   3    8.90    3.80
   5   2  -3   12.00    4.90
  -5   2   3   12.70    3.60
   4  -2  -3  288.97   11.30
  -4  -2   3  318.67   11.60
  -4   2   3  308.67   11.30
   4   2  -3  288.27   11.60
  -3  -2   3  105.49    5.60
   3  -2  -3  101.69    5.50
   3   2  -3   91.89    5.30
  -3   2   3   97.89    5.10
   2  -2  -3   21.20    2.20
  -2  -2   3   18.80    2.30
   2   2  -3   20.60    2.50
  -2   2   3   19.10    2.40
  -1  -2   3   -0.70    0.50
   1  -2  -3    0.30    0.70
   1   2  -3   -0.60    0.70
  -1   2   3    0.30    0.80
   0  -2  -3   91.09    4.40
   0  -2   3   90.49    2.40
   0   2   3   90.89    3.40
  -1  -2  -3  396.36    9.50
  -1  -2  -3  394.96   11.40
   1  -2   3  389.26    9.90
   1   2   3  389.86   11.50
  -1   2  -3  398.56    9.70
   1   2   3  400.56    9.60
  -2  -2  -3  153.78    7.20
   2  -2   3  154.18    6.50
  -2  -2  -3  157.58    5.20
   2   2   3  154.88    5.10
   2   2   3  154.18    7.20
  -2   2  -3  159.58    6.20
  -3  -2  -3  459.35   15.10
  -3  -2  -3  453.05   11.70
   3  -2   3  441.06   14.20
  -3   2  -3  448.86   10.00
  -3   2  -3  469.15   14.00
   3   2   3  461.25   15.40
   4  -2   3   53.99    6.70
  -4  -2  -3   58.49    6.50
  -4  -2  -3   58.69    4.30
   4   2   3   54.79    7.00
  -4   2  -3   61.39    6.00
  -4   2  -3   57.39    3.10
  -5  -2  -3   41.70    4.90
   5  -2   3   40.10    7.20
  -5  -2  -3   42.40    6.50
  -5   2  -3   50.49    7.30
   5   2   3   40.10    6.60
  -5   2  -3   45.80    3.70
  -6  -2  -3    4.10    3.70
  -6  -2  -3    8.30    6.10
   6  -2   3    0.60    6.80
  -6   2  -3    9.70    3.20
  -6   2  -3    3.10    5.80
   6   2   3   -1.90    4.50
   7  -2   3    2.60    7.30
  -7  -2  -3    5.60    5.10
  -7  -2  -3   -7.40    8.50
   7   2   3   -5.20    9.50
  -7   2  -3   -9.30    7.20
  -7   2  -3    2.20    4.30
   8  -3  -3    5.00   11.80
  -8  -3   3   -5.90    9.20
  -8  -3   3   -5.60    7.70
   8   3  -3  -16.10    8.10
  -8   3   3   16.80    8.30
  -7  -3   3   28.00    6.60
  -7  -3   3   34.50    8.20
   7  -3  -3   27.50    7.40
   7   3  -3   30.70    9.70
  -7   3   3   41.50    8.30
  -6  -3   3   19.40    5.30
  -6  -3   3   20.90    6.10
   6  -3  -3   14.20    4.90
   6   3  -3   23.30    6.80
  -6   3   3   26.80    6.10
   5  -3  -3   -2.40    3.00
  -5  -3   3   -2.00    3.30
  -5  -3   3   -0.10    2.60
   5   3  -3   -4.70    3.80
  -5   3   3    1.70    3.40
   4  -3  -3    7.60    3.00
  -4  -3   3   12.90    3.60
   4   3  -3   11.10    3.90
  -4   3   3    9.70    2.70
   3  -3  -3  533.55   15.40
  -3  -3   3  558.84   15.20
  -3   3   3  584.84   15.60
   3   3  -3  523.85   15.30
   2  -3  -3  289.77    9.00
  -2  -3   3  305.07    8.60
  -2   3   3  303.67    9.10
   2   3  -3  283.07    8.80
   1  -3  -3   75.29    3.50
  -1  -3   3   76.99    2.70
   1   3  -3   78.79    2.90
  -1   3   3   77.49    3.70
   0  -3  -3   95.79    4.90
   0  -3  -3  102.99    4.00
   0  -3   3   99.49    3.40
   0  -3  -3  103.79    4.20
   0   3   3   99.89    4.00
  -1  -3  -3   64.79    4.20
  -1  -3  -3   64.89    3.30
   1  -3   3   64.29    3.10
   1  -3   3   63.89    2.00
   1   3   3   64.29    4.30
   1   3   3   64.29    3.00
  -1   3  -3   61.29    2.70
   2  -3   3  343.17   10.40
  -2  -3  -3  360.96   12.00
  -2  -3  -3  349.57    9.50
   2   3   3  342.67   12.10
  -2   3  -3  342.27   10.10
   2   3   3  345.97    9.50
  -3  -3  -3    2.70    1.80
   3  -3   3    3.10    2.70
  -3  -3  -3    8.50    3.80
  -3   3  -3    4.00    2.40
   3   3   3    6.30    1.60
   3   3   3    8.50    3.10
  -4  -3  -3    0.20    2.20
  -4  -3  -3    3.60    3.00
   4  -3   3    1.00    3.50
   4   3   3   -1.70    3.80
  -4   3  -3   -1.20    2.70
  -4   3  -3   -0.80    1.00
  -5  -3  -3   34.70    4.80
  -5  -3  -3   26.00    6.60
   5  -3   3   28.00    6.40
   5   3   3   18.80    6.50
  -5   3  -3   35.10    3.40
  -5   3  -3   32.80    6.10
  -6  -3  -3    6.70    4.00
  -6  -3  -3   24.80    7.40
   6  -3   3   17.70    7.50
  -6   3  -3    8.20    2.90
  -6   3  -3    8.00    5.00
   6   3   3    0.90    7.50
  -7  -3  -3    5.40    8.80
  -7  -3  -3    3.50    6.10
   7  -3   3    4.10    8.90
  -7   3  -3    4.20    4.10
  -7   3  -3    0.90    8.90
   7   3   3   14.80    8.30
  -8  -4   3    3.10    9.70
   8  -4  -3   13.80   11.60
  -8  -4   3   12.00    8.10
  -8   4   3   15.00    8.80
   8   4  -3    3.70   12.10
  -7  -4   3    0.80    5.50
  -7  -4   3    5.70    7.60
   7  -4  -3   -2.20    7.80
  -7   4   3   14.20    4.60
   7   4  -3   15.00    8.60
  -6  -4   3   -3.60    3.50
  -6  -4   3   -0.50    4.50
   6  -4  -3    6.30    4.60
  -6   4   3   -6.50    3.10
   6   4  -3    4.60    4.70
  -5  -4   3   -3.10    3.70
  -5  -4   3   -0.10    3.30
   5  -4  -3    3.70    4.30
  -5   4   3    0.40    3.40
   5   4  -3    0.00    4.20
  -4  -4   3   -2.60    2.60
   4  -4  -3    0.30    2.40
  -4  -4   3   -1.50    2.70
  -4   4   3   -0.80    2.00
   4   4  -3   -0.10    3.30
  -3  -4   3   81.29    5.20
   3  -4  -3   81.99    5.40
  -3  -4   3   87.39    5.10
  -3   4   3   90.59    5.20
   3   4  -3   77.39    5.40
  -2  -4   3   35.50    2.90
   2  -4  -3   39.20    3.50
  -2  -4   3   37.10    3.60
   2   4  -3   36.70    3.40
  -2   4   3   37.40    3.40
  -1  -4   3    5.80    1.10
  -1  -4   3    6.00    1.70
   1  -4  -3    7.40    1.70
   1   4  -3    7.00    1.30
  -1   4   3    8.10    1.80
  -1   4   3    6.10    1.40
   0  -4  -3    0.80    1.20
   0  -4   3    0.90    0.30
   0  -4  -3   -1.30    1.70
   0  -4  -3   -0.50    1.00
   0  -4   3    1.10    0.90
   0   4   3    1.20    1.20
  -1  -4  -3    5.80    2.40
   1  -4   3    7.50    1.10
  -1  -4  -3    7.50    1.50
   1  -4   3    7.60    1.40
   1   4   3    8.00    1.70
  -1   4  -3    7.60    1.00
   1   4   3    9.20    2.90
  -1   4  -3    7.70    1.20
  -2  -4  -3   63.19    5.40
   2  -4   3   62.69    4.10
  -2  -4  -3   67.59    4.00
  -2   4  -3   58.19    3.80
  -2   4  -3   62.49    2.10
   2   4   3   61.59    3.80
   2   4   3   62.99    5.90
  -3  -4  -3   16.00    4.40
   3  -4   3   13.70    3.30
  -3  -4  -3   13.80    2.60
  -3   4  -3   12.50    2.80
  -3   4  -3   14.10    1.30
   3   4   3    9.50    2.20
   3   4   3    4.10    3.90
   4  -4   3   25.40    5.00
  -4  -4  -3   23.70    5.60
  -4  -4  -3   30.50    4.00
   4   4   3   25.60    6.00
  -4   4  -3   27.70    2.00
  -4   4  -3   33.90    4.90
  -5  -4  -3   29.40    6.10
   5  -4   3   15.20    6.50
  -5  -4  -3   22.60    4.30
  -5   4  -3   20.60    5.60
   5   4   3   35.00    7.40
  -5   4  -3   20.20    2.60
   6  -4   3   41.10    8.00
  -6  -4  -3   36.30    8.70
  -6  -4  -3   28.60    5.40
  -6   4  -3   28.00    3.60
  -6   4  -3   35.80    8.10
   6   4   3   30.70    7.90
   7  -4   3    3.30    9.40
  -7  -4  -3   -6.20    5.80
  -7  -4  -3    9.00    8.00
   7   4   3   10.30   11.20
  -7   4  -3    0.60    3.70
  -7   4  -3    1.70    5.70
   7  -5  -3   15.80    9.00
  -7  -5   3   19.50    7.10
  -7  -5   3   20.90    8.10
  -7   5   3   13.40    7.30
   7   5  -3    7.10    7.00
  -6  -5   3    0.40    5.50
   6  -5  -3   -4.10    5.40
  -6  -5   3   -2.50    4.20
  -6   5   3   -7.00    4.90
   6   5  -3    6.90    5.00
   5  -5  -3    3.90    3.50
  -5  -5   3    1.10    4.10
   5   5  -3   -3.00    4.20
  -5   5   3    0.80    4.20
  -4  -5   3    9.50    3.30
   4  -5  -3    5.50    3.50
  -4  -5   3    6.90    2.80
  -4   5   3    6.90    2.60
   4   5  -3    4.70    3.70
  -3  -5   3   -1.90    1.50
  -3  -5   3    1.90    2.10
   3  -5  -3    0.10    1.70
  -3   5   3    1.80    2.30
   3   5  -3   -1.80    2.30
  -2  -5   3  604.84   16.00
   2  -5  -3  624.04   16.30
  -2  -5   3  626.84   15.40
  -2   5   3  629.34   15.70
   2   5  -3  614.74   15.70
  -2   5   3  635.64   16.20
   1  -5  -3  416.16   11.30
  -1  -5   3  410.56   11.10
  -1  -5   3  399.26    9.80
  -1   5   3  404.66   11.10
  -1   5   3  405.06   11.20
   1   5  -3  403.06    9.90
   0  -5  -3   10.90    2.70
   0  -5   3    8.10    1.60
   0  -5   3    9.50    0.90
   0  -5  -3    7.90    1.80
   0  -5  -3    9.10    1.70
   0  -5   3    9.70    1.20
   0   5   3    9.00    1.80
   0   5  -3    7.90    1.50
  -1  -5  -3   -0.50    2.40
   1  -5   3    4.00    1.20
   1  -5   3    5.80    1.10
  -1  -5  -3    2.70    1.80
   1   5   3    6.50    1.80
   1   5   3    7.70    3.10
  -1   5  -3    5.10    1.10
  -1   5  -3    4.60    1.00
   2  -5   3  130.39    5.60
  -2  -5  -3  140.69    7.80
  -2  -5  -3  130.79    6.00
   2   5   3  137.69    8.30
  -2   5  -3  137.29    5.50
  -2   5  -3  131.69    4.00
   2   5   3  136.89    5.70
  -3  -5  -3   24.60    3.50
   3  -5   3   28.50    4.00
  -3  -5  -3   39.20    5.00
   3   5   3   31.60    5.90
  -3   5  -3   29.80    3.60
   3   5   3   30.30    3.60
  -3   5  -3   28.10    1.90
  -4  -5  -3   21.20    3.80
   4  -5   3   26.20    5.00
  -4  -5  -3   35.00    5.80
   4   5   3   25.10    3.70
  -4   5  -3   26.30    2.10
   4   5   3   32.50    6.40
  -4   5  -3   34.50    5.00
  -5  -5  -3    4.60    3.80
   5  -5   3   -3.80    3.60
  -5  -5  -3   -1.70    4.90
  -5   5  -3    3.30    3.40
  -5   5  -3    2.00    1.60
   5   5   3   -2.50    4.60
   6  -5   3   -0.10    5.20
  -6  -5  -3    8.00    4.70
  -6  -5  -3   -0.60    5.50
  -6   5  -3    3.90    2.80
  -6   5  -3    4.60    5.90
   6   5   3   17.10    8.80
  -6   5  -3   11.80    2.40
  -7  -5  -3   18.70    7.50
   7  -5   3   -3.90    9.00
  -7  -5  -3    9.10    6.80
  -7   5  -3    0.70    3.60
  -7   5  -3    9.20    8.80
  -7   5  -3    5.40    3.20
   7   5   3    8.80   11.50
   7  -6  -3  -12.40    7.60
  -7  -6   3    5.20    6.30
  -7  -6   3   -5.60    7.20
  -7   6   3   -4.60    4.80
   7   6  -3  -10.80    8.10
   6  -6  -3   -4.00    6.50
  -6  -6   3   -1.70    3.90
  -6  -6   3    4.50    6.20
   6   6  -3  -12.30    5.30
  -6   6   3   -8.40    4.90
  -5  -6   3   23.50    5.90
  -5  -6   3   23.10    5.30
   5  -6  -3   24.50    6.00
   5   6  -3   19.80    4.90
  -5   6   3   25.30    5.60
   4  -6  -3    2.30    3.50
  -4  -6   3    2.60    2.90
  -4  -6   3    3.50    2.30
  -4   6   3    6.50    3.20
   4   6  -3    7.80    3.60
  -3  -6   3    3.00    2.80
  -3  -6   3    6.60    2.80
   3  -6  -3   10.30    3.00
  -3   6   3    4.20    2.40
  -3   6   3    8.10    2.70
   3   6  -3    7.10    3.00
  -2  -6   3   64.79    4.40
  -2  -6   3   69.89    4.40
   2  -6  -3   58.09    4.70
   2   6  -3   65.99    4.60
  -2   6   3   68.79    4.40
  -2   6   3   66.89    4.10
  -1  -6   3   21.90    2.50
   1  -6  -3   24.50    3.20
  -1  -6   3   25.70    2.30
   1  -6  -3   21.80    2.60
  -1   6   3   26.00    3.20
   1   6  -3   24.10    2.60
   1   6  -3   23.40    2.60
  -1   6   3   27.00    3.40
   0  -6   3    4.00    0.80
   0  -6  -3    4.30    2.10
   0  -6   3    2.90    1.40
   0  -6   3    2.80    1.20
   0  -6  -3    5.70    1.60
   0  -6  -3    4.30    2.00
   0   6   3    2.40    1.30
   0   6  -3    1.30    1.30
  -1  -6  -3  160.68    6.60
   1  -6   3  154.88    5.20
  -1  -6  -3  156.88    8.20
   1  -6   3  156.58    5.20
   1   6   3  147.59    7.70
   1   6   3  151.48    6.40
  -1   6  -3  155.08    4.80
  -1   6  -3  153.58    5.20
   2  -6   3   31.20    3.30
  -2  -6  -3   29.30    3.20
  -2  -6  -3   33.10    5.20
  -2   6  -3   29.70    2.20
   2   6   3   38.80    3.80
   2   6   3   25.30    5.00
  -2   6  -3   28.00    2.80
   3  -6   3    1.90    2.60
  -3  -6  -3    3.30    3.80
  -3  -6  -3    7.10    2.60
  -3   6  -3    7.40    1.30
  -3   6  -3    6.70    2.20
   3   6   3    8.30    2.70
   3   6   3    1.10    4.40
   4  -6   3   75.39    6.90
  -4  -6  -3   62.09    5.90
  -4  -6  -3   71.99    8.90
   4   6   3   63.29    7.60
  -4   6  -3   67.39    3.40
  -4   6  -3   65.89    6.00
   4   6   3   62.99    5.60
   5  -6   3    9.40    5.60
  -5  -6  -3   11.40    6.50
  -5  -6  -3    9.00    4.00
  -5   6  -3   10.40    4.70
   5   6   3   23.30    7.80
  -5   6  -3   13.70    2.10
  -6  -6  -3    6.90    4.90
  -6  -6  -3   13.80    6.20
   6  -6   3   -1.20    6.40
   6   6   3    2.10    6.80
  -6   6  -3    0.70    5.90
  -6   6  -3    5.30    2.30
  -6   6  -3   -1.30    2.60
  -7  -6  -3   -4.70    7.10
   7  -6   3   -2.10    9.20
  -7  -6  -3   -4.70    6.60
  -7   6  -3   -4.20    7.80
  -7   6  -3    4.70    3.10
  -7   6  -3   -5.90    3.30
   7   6   3    3.70    9.40
  -7  -7   3    2.00    7.20
   7  -7  -3    5.70    8.10
  -7  -7   3    3.60    8.10
  -7   7   3    9.00    8.20
   7   7  -3    0.90    9.20
  -6  -7   3   32.70    7.50
   6  -7  -3   11.70    7.20
  -6  -7   3   23.90    6.30
   6   7  -3   16.40    7.10
  -6   7   3   25.00    5.90
  -5  -7   3   19.10    5.00
   5  -7  -3    5.70    5.10
  -5  -7   3   17.50    4.50
   5   7  -3   14.00    5.50
  -5   7   3   16.00    4.50
   4  -7  -3    2.60    2.80
  -4  -7   3   -0.90    3.10
  -4  -7   3    3.70    2.60
  -4   7   3   -0.10    2.40
   4   7  -3   -1.60    3.70
  -4   7   3    1.00    2.40
  -3  -7   3    0.90    2.50
   3  -7  -3   -1.70    2.40
  -3  -7   3    1.80    1.90
   3   7  -3    2.50    2.90
  -3   7   3    2.70    2.60
  -3   7   3   -0.90    2.10
  -2  -7   3   98.99    5.50
  -2  -7   3  100.49    6.10
   2  -7  -3  101.39    6.00
  -2   7   3  113.79    6.00
   2   7  -3  100.59    5.70
  -2   7   3   97.99    5.20
  -1  -7   3    1.80    2.00
   1  -7  -3    4.90    2.10
  -1  -7   3    4.70    1.60
   1  -7  -3    5.50    2.30
  -1   7   3    4.40    2.00
   1   7  -3    4.40    2.10
   1   7  -3    6.70    2.00
  -1   7   3    4.30    1.80
   0  -7  -3    1.50    1.90
   0  -7   3    2.90    1.50
   0  -7  -3    2.00    2.10
   0  -7   3    1.90    1.00
   0  -7  -3    3.60    3.20
   0  -7   3    5.10    1.90
   0   7   3    2.10    2.00
   0   7  -3    2.00    1.40
  -1  -7  -3   39.40    4.60
   1  -7   3   31.60    2.90
  -1  -7  -3   28.70    3.20
   1  -7   3   26.50    2.50
  -1   7  -3   30.40    2.30
   1   7   3   31.40    3.30
   1   7   3   43.60    5.60
  -1   7  -3   31.20    2.60
   2  -7   3    7.80    2.40
   2  -7   3    5.20    1.40
  -2  -7  -3    4.80    2.70
  -2  -7  -3    8.80    3.70
  -2   7  -3    7.20    2.00
   2   7   3    7.30    4.00
  -2   7  -3    3.90    1.50
   2   7   3    6.40    2.50
  -3  -7  -3   16.70    3.50
  -3  -7  -3   11.60    4.90
   3  -7   3   13.40    3.50
   3   7   3   12.30    5.80
   3   7   3   11.80    3.10
  -3   7  -3   14.20    2.00
  -3   7  -3   10.70    2.70
  -4  -7  -3   65.49    6.30
   4  -7   3   52.79    6.50
  -4  -7  -3   61.69    8.70
  -4   7  -3   58.29    5.50
   4   7   3   55.19    8.20
  -4   7  -3   54.79    3.40
   4   7   3   52.29    5.50
  -5  -7  -3   23.10    5.30
   5  -7   3   19.80    6.40
  -5  -7  -3   21.90    8.00
  -5   7  -3   23.30    2.80
  -5   7  -3   21.50    5.60
   5   7   3   30.30    9.00
  -6  -7  -3   -1.70    7.20
  -6  -7  -3   -3.40    5.00
   6  -7   3    3.20    6.80
  -6   7  -3    1.30    5.60
  -6   7  -3   -0.60    2.40
   6   7   3   -7.50    9.40
  -7  -7  -3   -0.80    9.60
   7  -7   3    7.30    7.80
  -7  -7  -3   -3.30    7.30
   7   7   3   16.00   13.90
  -7   7  -3    0.20    6.70
  -7   7  -3   -0.20    3.00
  -7   7  -3   -6.70    3.30
  -7  -8   3   -1.60    7.90
   7  -8  -3   -7.80    6.30
  -7  -8   3   -2.20    5.10
  -7   8   3    2.80    6.40
   7   8  -3   11.90   10.10
  -6  -8   3   -2.10    6.40
   6  -8  -3    7.20    7.00
  -6  -8   3    7.70    5.50
  -6   8   3   -2.60    4.30
  -6   8   3   11.00    6.80
   6   8  -3   -3.10    7.40
  -5  -8   3    4.90    4.20
  -5  -8   3   11.70    4.10
   5  -8  -3   13.50    5.60
   5   8  -3    7.40    6.00
  -5   8   3   14.10    3.90
  -5   8   3   14.40    4.50
   4  -8  -3    1.00    3.60
  -4  -8   3   -4.40    3.30
  -4  -8   3   -4.20    2.30
  -4   8   3   -2.20    2.70
  -4   8   3   -4.20    2.20
   4   8  -3    2.90    4.10
  -3  -8   3    7.80    2.60
   3  -8  -3    4.10    2.70
  -3  -8   3    2.00    3.10
  -3   8   3    2.50    2.30
  -3   8   3    3.20    2.80
   3   8  -3   -1.60    3.30
  -2  -8   3   79.59    5.40
   2  -8  -3   77.29    5.30
  -2  -8   3   80.89    5.40
   2   8  -3   80.89    5.70
   2   8  -3   83.69    5.60
  -2   8   3   75.59    5.60
  -2   8   3   88.29    5.70
   1  -8  -3  377.86   11.70
   1  -8  -3  400.16   12.20
  -1  -8   3  366.16   10.80
  -1  -8   3  385.66   11.90
   1   8  -3  390.26   11.80
  -1   8   3  371.36   11.90
  -1   8   3  376.46   11.80
   0  -8   3    0.20    1.00
   0  -8   3    1.00    1.70
   0  -8  -3   -1.10    2.20
   0  -8   3   -0.50    1.60
   0  -8  -3    0.30    1.80
   0  -8  -3   -0.10    2.20
   0   8   3    0.00    1.70
   0   8  -3    2.60    1.70
   1  -8   3   79.89    4.00
   1  -8   3   84.19    4.50
  -1  -8  -3   76.59    5.00
  -1  -8  -3   85.89    7.20
   1   8   3   83.29    7.30
  -1   8  -3   79.19    4.20
   1   8   3   79.59    5.10
  -1   8  -3   76.29    3.70
  -2  -8  -3   -0.60    2.60
   2  -8   3    0.90    1.90
  -2  -8  -3    4.90    3.20
   2  -8   3    0.80    1.50
   2   8   3    4.20    4.30
   2   8   3   -1.10    2.20
  -2   8  -3    1.00    1.60
  -2   8  -3    2.50    1.60
  -3  -8  -3   -3.70    3.70
  -3  -8  -3   -3.10    3.00
   3  -8   3    0.00    2.80
  -3   8  -3    2.90    2.30
   3   8   3    1.60    1.90
  -3   8  -3    2.30    1.70
   3   8   3    6.60    5.00
  -4  -8  -3  160.78    8.90
  -4  -8  -3  151.18   11.80
   4  -8   3  144.19    8.90
   4   8   3  156.28    8.60
   4   8   3  127.89   12.50
  -4   8  -3  136.39    8.20
  -4   8  -3  145.49    5.60
   5  -8   3   12.00    5.80
  -5  -8  -3    5.20    4.70
  -5  -8  -3   16.40    7.80
  -5   8  -3   12.30    4.40
  -5   8  -3   10.20    2.60
   5   8   3   15.70    6.60
   6  -8   3    6.50    6.80
  -6  -8  -3  -13.80    8.00
  -6  -8  -3   -1.70    5.40
   6   8   3    7.00    8.00
  -6   8  -3   -5.10    5.60
  -6   8  -3   -4.50    2.50
  -7  -9   3  -12.20    6.90
  -7  -9   3  -10.70    8.50
   7  -9  -3    4.60    9.60
  -7   9   3   10.10    6.00
   7   9  -3   -7.80    9.70
  -7   9   3   10.80    9.10
  -6  -9   3    9.80    6.40
   6  -9  -3    2.40    7.10
  -6  -9   3    4.30    4.60
  -6   9   3   -3.60    5.90
   6   9  -3    4.70    8.40
  -6   9   3    7.40    4.80
  -5  -9   3    6.50    5.20
   5  -9  -3   -1.30    3.90
  -5  -9   3    9.60    5.30
  -5   9   3    7.00    4.00
   5   9  -3    7.80    6.00
  -5   9   3    4.60    5.20
   4  -9  -3    3.30    3.90
  -4  -9   3    5.00    3.90
  -4  -9   3    0.60    2.70
  -4   9   3    4.90    3.10
  -4   9   3    4.00    2.90
   4   9  -3    2.00    4.40
  -3  -9   3    1.20    3.10
   3  -9  -3    2.20    2.20
  -3  -9   3    1.80    2.40
  -3   9   3    3.80    3.20
  -3   9   3    1.90    2.80
   3   9  -3    7.50    4.10
   2  -9  -3  310.47   11.30
  -2  -9   3  304.17   10.70
  -2  -9   3  310.87   11.10
  -2   9   3  300.27   10.90
   2   9  -3  302.47   11.30
  -2   9   3  297.37   10.90
   2   9  -3  291.27   10.80
  -1  -9   3   51.79    3.40
  -1  -9   3   42.10    4.70
   1  -9  -3   41.60    4.00
   1  -9  -3   49.00    4.90
  -1  -9   3   49.90    4.30
   1   9  -3   48.60    4.70
  -1   9   3   44.90    4.80
   0  -9   3    2.30    2.00
   0  -9  -3   -2.80    3.40
   0  -9   3    2.20    1.40
   0  -9  -3    1.20    2.00
   0  -9  -3   -0.80    2.30
   0  -9   3    2.10    2.10
   0   9   3    0.30    2.40
   0   9  -3    3.70    1.90
   1  -9   3   30.60    3.40
   1  -9   3   38.60    3.10
  -1  -9  -3   37.50    4.70
  -1  -9  -3   45.40    6.60
   1   9   3   37.70    6.30
   1   9   3   32.90    4.50
  -1   9  -3   35.50    2.90
  -1   9  -3   44.20    3.60
  -2  -9  -3    6.70    2.60
   2  -9   3    1.60    1.60
   2  -9   3    5.70    2.40
  -2  -9  -3    8.20    4.50
  -2   9  -3    0.00    1.70
   2   9   3   -2.40    4.20
  -2   9  -3    4.90    1.80
   2   9   3   -0.80    1.90
  -3  -9  -3   21.50    4.70
  -3  -9  -3   21.60    4.90
   3  -9   3   23.80    4.40
   3   9   3   25.20    3.90
   3   9   3   20.40    5.20
  -3   9  -3   33.70    3.50
  -3   9  -3   31.00    4.10
   4  -9   3   56.99    6.70
  -4  -9  -3   45.60    7.90
  -4  -9  -3   63.79    7.00
  -4   9  -3   53.99    4.20
  -4   9  -3   58.59    6.10
   4   9   3   32.80    8.50
   4   9   3   57.59    6.60
   5  -9   3   10.70    6.10
  -5  -9  -3    1.60    4.80
  -5  -9  -3    9.70    6.20
  -5   9  -3   15.90    5.40
   5   9   3   21.50    9.80
  -5   9  -3   13.70    2.70
  -6  -9  -3   -0.80    5.70
  -6  -9  -3   10.00    9.10
   6  -9   3   -4.60    6.50
  -6   9  -3    3.80    2.90
  -6   9  -3    5.50    6.60
   6   9   3   -9.80   11.90
  -7 -10   3   -5.30    8.60
   7 -10  -3    6.50   11.20
  -7 -10   3    3.00    9.40
  -7  10   3   -0.60    6.80
  -7  10   3   -3.40    6.30
   7  10  -3   11.70   11.90
  -6 -10   3   -8.50    5.80
   6 -10  -3   10.90    7.40
  -6 -10   3   -1.10    6.90
  -6  10   3   -8.20    4.60
  -6  10   3   -2.70    6.40
   6  10  -3   14.70    9.00
  -5 -10   3    0.70    5.10
  -5 -10   3   -1.00    5.00
   5 -10  -3    2.50    5.80
  -5  10   3   -4.60    3.80
   5  10  -3   -5.80    6.30
  -5  10   3   -2.50    4.70
  -4 -10   3   -7.30    4.20
   4 -10  -3    1.60    4.30
  -4 -10   3   -0.50    4.20
  -4  10   3   -4.20    2.90
  -4  10   3    5.30    4.40
   4  10  -3   11.00    5.70
   3 -10  -3   33.00    5.20
  -3 -10   3   31.50    4.90
  -3 -10   3   43.90    6.10
   3  10  -3   46.20    6.30
  -3  10   3   37.00    5.10
  -3  10   3   36.70    4.60
   2 -10  -3    2.70    3.30
  -2 -10   3   -2.00    2.70
  -2 -10   3    3.70    2.50
  -2  10   3    3.00    2.80
  -2  10   3    0.10    2.70
   2  10  -3    1.10    2.90
   2  10  -3   -3.00    2.00
  -1 -10   3   27.90    4.00
   1 -10  -3   22.50    5.50
  -1 -10   3   26.90    3.10
  -1 -10   3   26.90    4.00
   1 -10  -3   29.50    4.40
   1 -10  -3   23.30    4.10
   1  10  -3   21.90    3.50
  -1  10   3   26.90    4.50
   0 -10  -3   28.70    5.30
   0 -10   3   17.70    3.30
   0 -10   3   23.20    3.60
   0 -10  -3   21.20    3.60
   0 -10  -3   27.30    4.00
   0 -10   3   27.00    2.90
   0  10   3   23.80    4.00
   0  10  -3   35.20    4.20
  -1 -10  -3   21.20    4.20
   1 -10   3   25.90    3.50
   1 -10   3   22.70    2.90
  -1 -10  -3   23.30    5.90
   1  10   3   18.70    4.20
  -1  10  -3   17.30    3.20
  -1  10  -3   23.70    2.70
   2 -10   3   -0.50    2.00
  -2 -10  -3    0.00    3.20
  -2 -10  -3   -0.10    3.20
   2 -10   3    2.00    2.50
  -2  10  -3    4.30    2.00
  -2  10  -3   -2.10    2.00
   2  10   3    4.50    4.80
   2  10   3    4.50    2.70
  -3 -10  -3   -1.20    2.80
  -3 -10  -3   -4.60    4.80
   3 -10   3    4.60    3.20
   3  10   3   -0.20    3.40
  -3  10  -3    0.30    2.40
   3  10   3   -0.70    5.20
  -3  10  -3    4.20    2.40
   4 -10   3   -4.20    4.00
  -4 -10  -3   -4.10    6.20
  -4 -10  -3    2.00    4.30
  -4  10  -3    4.30    3.80
  -4  10  -3    0.20    2.40
   4  10   3   -1.30    5.00
   4  10   3    3.10    4.50
  -5 -10  -3   -4.50    4.90
  -5 -10  -3  -10.40    7.80
   5 -10   3    5.90    5.80
   5  10   3   -2.50    4.60
  -5  10  -3   11.00    2.90
   5  10   3   -9.60    8.80
  -5  10  -3   12.80    5.50
  -6 -10  -3    4.50    7.70
   6 -10   3    2.00    8.20
  -6  10  -3    3.30    3.30
   6  10   3   -1.70    9.60
  -6  10  -3   -4.20    7.20
  -6 -11   3    1.60    6.90
  -6 -11   3   -3.50    6.00
   6 -11  -3   -2.90    8.00
  -6  11   3    1.90    7.10
  -6  11   3   -0.20    5.30
   6  11  -3  -17.40    9.20
  -5 -11   3    7.20    6.00
   5 -11  -3    0.90    6.10
  -5 -11   3    5.70    5.50
   5  11  -3   -1.90    6.80
  -5  11   3    6.30    5.00
  -5  11   3   12.90    5.20
   4 -11  -3    0.70    4.90
  -4 -11   3   -8.90    4.20
  -4 -11   3    8.80    5.30
  -4  11   3    0.90    3.80
   4  11  -3   -4.30    4.90
  -4  11   3    6.60    5.00
   3 -11  -3  174.58    9.50
  -3 -11   3  184.38   10.30
  -3 -11   3  185.58   10.20
  -3  11   3  168.98    9.40
  -3  11   3  175.08    9.60
   3  11  -3  152.38    9.90
   2 -11  -3    1.40    3.60
  -2 -11   3    3.90    3.80
  -2 -11   3   -3.50    2.70
  -2  11   3    4.00    3.40
   2  11  -3   -2.30    3.10
  -2  11   3    2.10    3.20
   2  11  -3    1.50    3.70
  -1 -11   3   27.60    4.50
   1 -11  -3   22.10    3.90
   1 -11  -3   20.00    6.00
  -1 -11   3   21.10    3.10
   1 -11  -3   18.70    4.10
  -1 -11   3   18.90    3.80
  -1  11   3   16.90    3.70
   1  11  -3   17.70    3.90
   0 -11  -3   -0.50    4.10
   0 -11   3    2.70    2.60
   0 -11   3   -0.80    1.60
   0 -11  -3    1.60    2.40
   0 -11  -3   -1.30    2.70
   0 -11   3    1.60    2.70
   0  11   3    3.50    2.40
   0  11  -3    2.20    2.50
  -1 -11  -3   12.80    5.20
   1 -11   3   11.20    3.10
  -1 -11  -3   12.00    3.30
  -1 -11  -3   14.00    3.40
   1 -11   3   11.60    2.50
  -1  11  -3   19.60    3.40
   1  11   3   15.40    3.80
   2 -11   3   56.69    4.90
  -2 -11  -3   80.49    9.10
   2 -11   3   69.19    5.60
  -2 -11  -3   56.49    6.70
  -2  11  -3   62.99    4.70
   2  11   3   54.49    6.60
  -2  11  -3   50.69    4.90
   2  11   3   70.69    9.50
   3 -11   3    7.30    3.80
  -3 -11  -3    8.00    3.40
  -3 -11  -3    1.50    4.30
   3  11   3    2.00    6.40
  -3  11  -3   11.30    3.20
   3  11   3    1.60    4.10
  -3  11  -3    9.40    3.00
  -4 -11  -3    0.10    7.50
  -4 -11  -3   14.80    5.70
   4 -11   3   16.20    5.70
  -4  11  -3   17.00    4.40
   4  11   3    9.90    4.20
   4  11   3   23.40    8.50
  -4  11  -3   10.10    3.40
   5 -11   3    5.80    5.60
  -5 -11  -3    6.40    8.40
  -5 -11  -3    3.50    6.30
  -5  11  -3    8.30    3.50
   5  11   3    5.80    5.40
   5  11   3  -11.50    8.90
  -5  11  -3   15.10    6.00
  -6 -11  -3    0.60   11.00
   6 -11   3   -6.90    8.60
  -6 -11  -3   -2.90    6.90
  -6  11  -3   -5.10    7.70
   6  11   3   -3.90   13.80
  -6  11  -3    2.60    3.80
  -6 -12   3   -4.50    7.50
   6 -12  -3  -10.00    7.50
  -6 -12   3   -7.30    5.50
  -6  12   3    5.40    6.60
   6  12  -3  -21.50   10.30
  -6  12   3    8.40    6.70
  -5 -12   3    7.60    6.60
  -5 -12   3   10.70    6.40
   5 -12  -3   15.00    6.30
  -5  12   3   16.70    5.50
   5  12  -3    8.10    8.60
  -5  12   3    4.00    6.30
  -4 -12   3    4.40    3.90
  -4 -12   3    8.50    5.40
   4 -12  -3    6.00    5.20
  -4  12   3    5.20    4.10
   4  12  -3    7.60    6.00
  -4  12   3    6.30    4.60
   3 -12  -3  328.77   13.20
  -3 -12   3  325.77   13.70
  -3 -12   3  348.77   14.10
   3  12  -3  344.07   15.20
  -3  12   3  358.76   13.80
  -3  12   3  351.76   13.90
   3  12  -3  333.07   13.50
  -2 -12   3   58.69    6.40
   2 -12  -3   59.49    7.10
  -2 -12   3   70.69    6.40
  -2  12   3   54.59    6.70
   2  12  -3   68.79    7.10
  -2  12   3   67.09    6.00
   1 -12  -3    8.90    5.70
  -1 -12   3    2.10    2.20
   1 -12  -3    4.10    3.50
   1 -12  -3    7.20    3.90
  -1 -12   3    7.20    3.40
  -1 -12   3    8.40    3.50
   1  12  -3    4.30    3.50
  -1  12   3    6.00    3.40
   0 -12  -3   41.20    7.40
   0 -12  -3   34.20    5.50
   0 -12   3   45.30    5.50
   0 -12   3   35.20    4.90
   0 -12   3   41.10    4.00
   0 -12  -3   36.50    5.00
   0  12   3   44.70    5.30
   0  12  -3   44.40    5.50
  -1 -12  -3    1.20    3.50
  -1 -12  -3    2.50    3.40
   1 -12   3    1.10    2.10
   1 -12   3    1.60    2.70
  -1 -12  -3    0.60    3.50
   1 -12   3    0.80    3.60
   1  12   3    2.20    3.80
  -1  12  -3   -1.70    2.60
  -2 -12  -3    0.50    5.80
  -2 -12  -3   -3.50    2.80
   2 -12   3    0.00    2.50
   2 -12   3   -3.60    2.70
   2  12   3    2.20    6.00
  -2  12  -3   -1.90    2.20
   2  12   3   -3.00    3.50
  -2  12  -3   -2.90    2.70
  -3 -12  -3   -2.30    5.80
  -3 -12  -3   -2.50    4.20
   3 -12   3   -1.90    3.70
   3  12   3    4.10    5.70
  -3  12  -3    1.90    3.00
  -3  12  -3   -1.30    3.00
   3  12   3   -0.30    4.00
   4 -12   3   -8.50    4.60
  -4 -12  -3   -5.00    7.70
  -4 -12  -3    0.00    5.50
   4  12   3   -3.40    8.50
   4  12   3    4.60    5.10
  -4  12  -3    3.90    3.40
  -4  12  -3   -0.10    3.80
   5 -12   3   -2.90    6.10
  -5 -12  -3   12.30    7.30
  -5 -12  -3   -8.40    9.50
  -5  12  -3   -1.70    3.70
  -5  12  -3    2.30    5.60
   5  12   3   12.20    7.20
   5  12   3   11.10   11.10
  -6 -13   3    5.90    8.70
  -6 -13   3    8.00   10.10
  -6  13   3    9.00    7.10
   6  13  -3  -23.40   11.50
  -6  13   3   11.00    9.10
   5 -13  -3    6.30    6.80
  -5 -13   3   14.10    7.70
  -5 -13   3    6.10    7.80
  -5  13   3    7.90    6.00
  -5  13   3   -3.30    6.30
   5  13  -3   23.60    8.70
  -4 -13   3    6.80    6.00
   4 -13  -3   -0.10    5.70
  -4 -13   3   10.90    6.30
  -4  13   3    6.00    5.80
  -4  13   3    3.80    5.10
   4  13  -3   -2.60    7.10
  -3 -13   3   35.70    6.90
   3 -13  -3   27.80    5.40
  -3 -13   3   32.20    6.40
  -3  13   3   31.90    6.20
  -3  13   3   30.10    5.70
   3  13  -3   26.10    6.60
   3  13  -3   25.90    5.80
  -2 -13   3   12.80    4.60
   2 -13  -3   18.00    5.60
  -2 -13   3   17.10    5.30
  -2  13   3   18.80    5.40
  -2  13   3   16.80    4.30
   2  13  -3   20.00    4.50
  -1 -13   3   13.30    4.20
   1 -13  -3    6.10    4.00
   1 -13  -3    7.50    3.20
  -1 -13   3    9.40    3.10
   1 -13  -3   17.20    6.50
  -1 -13   3    9.10    4.40
  -1  13   3    9.60    4.30
   1  13  -3    6.20    4.00
   0 -13   3    0.70    3.30
   0 -13   3   -3.00    3.30
   0 -13  -3   -1.70    4.10
   0 -13  -3   -2.50    3.80
   0 -13   3    2.70    2.50
   0 -13  -3   -2.60    3.80
   0  13   3    2.70    3.20
   0  13  -3    5.70    3.50
   1 -13   3    1.30    3.10
  -1 -13  -3   -2.50    6.20
   1 -13   3    8.70    4.30
  -1 -13  -3    2.60    2.90
   1 -13   3    2.80    2.70
  -1 -13  -3    4.50    4.30
   1  13   3    7.70    4.30
  -1  13  -3    0.50    3.20
  -2 -13  -3    2.40    4.70
   2 -13   3    7.70    3.40
   2 -13   3    2.30    3.30
  -2 -13  -3   10.50    6.90
   2  13   3    9.60    4.80
  -2  13  -3    4.10    3.10
  -2  13  -3    5.30    3.70
   3 -13   3   48.50    6.50
  -3 -13  -3   56.59   10.40
  -3 -13  -3   49.99    7.50
   3  13   3   48.00   10.30
  -3  13  -3   57.39    5.80
   3  13   3   42.30    6.30
  -3  13  -3   53.09    6.30
   4 -13   3   -0.30    5.70
  -4 -13  -3    3.70    6.60
  -4 -13  -3    7.80    5.00
  -4  13  -3    7.40    3.90
   4  13   3    8.70   10.10
  -4  13  -3   -5.50    4.00
   4  13   3  -12.50    5.10
   5 -13   3   -5.40    6.70
  -5 -13  -3   -9.80    7.70
  -5 -13  -3   -8.70    7.40
  -5  13  -3   13.20    5.90
   5  13   3    3.60    7.90
   5  13   3    1.70   12.10
  -5  13  -3    3.20    4.50
  -5 -14   3   -2.70    7.30
   5 -14  -3    0.50    8.50
  -5 -14   3    4.50    6.20
  -5  14   3  -16.10    6.40
   5  14  -3    5.70    9.60
  -5  14   3   -8.50    7.70
   4 -14  -3    2.30    6.40
  -4 -14   3   19.30    7.50
  -4 -14   3   13.80    7.10
  -4  14   3    4.80    5.60
  -4  14   3    8.30    5.40
   4  14  -3   16.30    8.40
   3 -14  -3    2.40    4.80
  -3 -14   3   -3.50    5.10
  -3 -14   3   -1.80    4.00
   3  14  -3    3.70    6.20
  -3  14   3    0.10    5.10
  -3  14   3   -0.90    5.10
   3  14  -3    4.40    5.70
  -2 -14   3   10.70    3.80
  -2 -14   3    5.60    3.70
   2 -14  -3   -2.00    4.20
  -2 -14   3    0.80    4.50
  -2  14   3   10.30    3.80
   2  14  -3    7.60    3.80
   1 -14  -3   13.50    7.00
  -1 -14   3   -0.50    4.20
   1 -14  -3  -10.10    3.90
   1 -14  -3   -5.80    3.90
  -1 -14   3    2.10    4.10
  -1 -14   3   -1.00    2.90
   1  14  -3   -1.50    4.00
  -1  14   3    4.40    4.20
   0 -14   3    4.40    4.60
   0 -14   3   10.70    4.40
   0 -14  -3   -0.70    6.20
   0 -14  -3    8.10    4.90
   0 -14   3    9.60    3.20
   0 -14  -3    5.80    3.20
   0  14   3   17.40    4.50
   0  14  -3   10.70    3.60
  -1 -14  -3    0.10    4.10
   1 -14   3   -1.40    2.90
  -1 -14  -3    1.70    7.00
   1 -14   3    5.70    3.60
   1 -14   3    3.30    4.40
  -1 -14  -3   -2.50    4.50
  -1  14  -3    4.60    3.90
   1  14   3   -6.90    2.80
  -2 -14  -3    0.90    4.60
   2 -14   3    0.10    3.50
  -2 -14  -3   -2.20    4.60
  -2 -14  -3    6.30    6.80
   2 -14   3    0.70    3.00
   2  14   3   -7.00    4.80
  -2  14  -3   -8.60    3.40
  -3 -14  -3   19.00    6.80
   3 -14   3   19.80    5.30
  -3 -14  -3   11.50    8.60
   3  14   3   20.90    6.00
  -3  14  -3   24.40    5.20
   3  14   3   23.60    8.10
  -3  14  -3   25.70    4.80
  -4 -14  -3    5.80    5.20
  -4 -14  -3   -0.50    8.50
   4 -14   3    7.90    6.50
   4  14   3   -9.10   11.80
  -4  14  -3    7.00    5.60
   4  14   3    7.60    6.10
  -4  14  -3    4.20    4.10
   5 -14   3    0.10    7.80
  -5 -14  -3    1.70   11.50
  -5  14  -3   -2.40    4.70
   5  14   3   11.70    8.80
   5  14   3    8.90   14.90
  -5  14  -3   -7.50    6.00
  -5 -15   3   -1.20    8.90
   5 -15  -3   29.30   10.30
  -5 -15   3   18.60    9.80
  -5  15   3   16.00    8.00
   5  15  -3   22.60   12.40
  -5  15   3   17.70    8.60
  -4 -15   3   11.90    6.20
  -4 -15   3   -5.70    7.30
   4 -15  -3   -5.10    6.40
   4  15  -3    9.50    8.60
  -4  15   3   -2.10    6.40
  -4  15   3   -4.70    6.80
   3 -15  -3  -12.60    4.60
  -3 -15   3   -0.80    6.20
  -3 -15   3   -1.70    6.30
   3  15  -3    7.10    6.00
  -3  15   3    4.30    5.30
  -3  15   3    1.60    5.50
  -2 -15   3    7.00    4.10
   2 -15  -3   13.50    5.60
   2 -15  -3    3.50    7.40
  -2 -15   3   -0.20    5.20
  -2 -15   3   15.40    5.60
  -2  15   3    3.90    5.10
   2  15  -3    5.00    4.00
  -1 -15   3    0.20    3.90
  -1 -15   3    3.70    5.20
  -1 -15   3    0.20    3.30
   1 -15  -3   10.30    7.90
   1 -15  -3    0.00    4.10
   1 -15  -3    2.70    4.70
   1  15  -3   -0.70    5.00
  -1  15   3    5.20    4.20
   0 -15   3   -9.20    4.00
   0 -15   3    0.20    4.90
   0 -15  -3    8.20    7.10
   0 -15  -3    3.90    4.40
   0 -15   3    5.30    3.50
   0 -15  -3   -1.40    4.40
   0  15  -3    3.90    4.50
   0  15   3    2.40    3.90
  -1 -15  -3    0.40    4.80
   1 -15   3    6.00    4.10
   1 -15   3    2.00    5.60
   1 -15   3   -1.20    3.20
  -1 -15  -3   -4.60    6.80
  -1 -15  -3    1.10    5.30
   1  15   3   -3.50    3.70
  -1  15  -3   -2.30    4.20
   2 -15   3    4.00    4.00
  -2 -15  -3    9.60    5.70
  -2 -15  -3   -4.40    4.10
  -2 -15  -3   -0.50    7.40
   2 -15   3    3.10    3.90
   2  15   3    4.50    4.70
  -2  15  -3    0.80    4.20
  -3 -15  -3    5.30    5.50
   3 -15   3    6.60    5.40
  -3 -15  -3   -2.50    8.50
   3  15   3    9.30   10.60
  -3  15  -3    0.20    4.60
   3  15   3   12.50    6.40
  -3  15  -3   -0.80    4.50
   4 -15   3   -3.90    7.20
  -4 -15  -3   -1.10    7.70
  -4 -15  -3   -0.90   10.60
  -4  15  -3  -11.80    5.00
  -4  15  -3    4.50    5.80
   4  15   3   14.70   12.30
   4  15   3    4.40    5.80
   4 -16  -3   48.30    9.50
  -4 -16   3   34.70    9.60
  -4 -16   3   51.19   10.30
  -4  16   3   44.50    8.50
  -4  16   3   20.50    8.20
   4  16  -3   47.80   11.60
  -3 -16   3   20.20    5.40
   3 -16  -3    7.20    5.50
  -3 -16   3   18.70    7.70
  -3 -16   3   24.40    8.00
  -3  16   3   23.60    6.70
   3  16  -3   24.50    7.70
   2 -16  -3   -4.40    6.00
  -2 -16   3    1.80    5.80
  -2 -16   3   -3.60    6.10
   2 -16  -3    3.90    9.00
  -2 -16   3   -8.70    4.20
   2  16  -3   -2.20    4.50
  -1 -16   3    0.10    5.30
   1 -16  -3    9.00    5.40
  -1 -16   3    1.10    4.00
   1 -16  -3   -0.20    8.90
   1 -16  -3    7.90    4.30
  -1 -16   3    2.90    5.50
   1  16  -3    0.70    4.70
  -1  16   3   -6.90    4.00
   0 -16  -3    1.40    7.30
   0 -16   3    1.00    3.90
   0 -16   3    7.60    6.30
   0 -16   3   -9.10    5.00
   0 -16  -3   11.40    5.10
   0 -16  -3    5.70    5.40
   0  16  -3   -5.00    5.00
   0  16   3    0.40    5.40
   1 -16   3    1.90    3.90
  -1 -16  -3   -8.20    8.70
   1 -16   3  -12.40    4.20
  -1 -16  -3   -9.00    5.20
  -1 -16  -3    5.10    4.70
   1 -16   3    0.60    5.90
  -1  16  -3   -5.90    4.80
   1  16   3   -7.30    5.60
  -2 -16  -3   31.10    7.50
  -2 -16  -3   36.00    7.50
   2 -16   3   26.90    7.90
   2 -16   3   19.50    5.60
   2 -16   3   21.40    5.70
  -2 -16  -3   27.30   10.40
   2  16   3   20.80    6.90
  -2  16  -3   28.00    6.00
  -3 -16  -3    5.90    6.10
   3 -16   3   -5.50    5.70
  -3 -16  -3   -0.30    9.90
  -3  16  -3    2.30    5.40
   3  16   3    8.10    5.60
  -3  16  -3    3.30    5.10
  -3 -17   3    8.10    6.00
  -3 -17   3   -4.00    8.10
   3 -17  -3   10.20    6.50
  -3 -17   3   17.90    5.50
   3 -17  -3   -7.10   10.00
   3  17  -3   16.00    8.00
  -3  17   3   -2.50    6.40
   2 -17  -3    0.10    6.20
  -2 -17   3   -8.80    6.00
   2 -17  -3    5.70   10.00
  -2 -17   3   -2.00    4.90
  -2 -17   3   14.70    7.00
   2  17  -3   -4.50    6.80
  -2  17   3   -0.80    4.80
   1 -17  -3   -6.20    5.50
  -1 -17   3   -4.00    4.20
  -1 -17   3    5.90    6.40
   1 -17  -3  -15.70    5.90
  -1 -17   3   -2.70    6.10
   1 -17  -3    4.10    9.10
   1  17  -3    3.50    6.00
  -1  17   3    2.20    6.70
   0 -17   3   -3.40    4.30
   0 -17  -3   -7.30    4.20
   0 -17   3    0.70    5.80
   0 -17   3   16.10    7.10
   0 -17  -3    4.80    7.90
   0 -17  -3    2.40    5.20
   0  17  -3    4.20    5.80
  -1 -17  -3   -4.60    6.90
  -1 -17  -3   -4.90    6.10
  -1 -17  -3   13.60    9.80
   1 -17   3    7.20    6.60
   1 -17   3   -4.40    4.00
   1 -17   3   -0.30    5.60
   1  17   3   11.10    7.20
  -1  17  -3    5.80    5.70
   2 -17   3   37.50    9.00
  -2 -17  -3   45.10    7.40
  -2 -17  -3   41.90   12.60
  -2 -17  -3   32.70    8.70
   2 -17   3   34.10    6.90
   2 -17   3   38.30    6.60
   2  17   3   32.20    8.40
  -2  17  -3   46.30    7.90
  -3 -17  -3   -7.80    9.90
   3 -17   3  -12.90    6.40
  -3 -17  -3    0.80    7.50
  -3 -17  -3   12.40    9.20
   3  17   3  -13.00    7.90
  -3  17  -3   18.10    6.90
  -2 -18   3   10.80    7.90
   2 -18  -3    2.30    8.00
  -2 -18   3  -11.40    5.80
   2 -18  -3    2.20   10.10
  -2 -18   3   -4.40    6.00
  -2  18   3    2.10    7.90
   2  18  -3   -4.10    8.40
   1 -18  -3   -1.60   10.30
  -1 -18   3    5.20    5.00
   1 -18  -3  -15.50    6.90
  -1 -18   3    0.60    8.00
  -1 -18   3   10.80    7.30
   1 -18  -3   -4.60    6.40
   1  18  -3   -4.40    7.20
  -1  18   3  -15.00    7.40
   0 -18   3    9.30    7.70
   0 -18  -3    5.70    7.00
   0 -18  -3    9.10   10.70
   0 -18   3   -0.60    6.50
   0 -18   3    8.40    5.50
   0 -18  -3    5.90    6.80
   0  18   3   -8.50    7.20
   0  18  -3   -6.70    6.80
  -1 -18  -3   -6.20    7.10
  -1 -18  -3    9.30    6.30
   1 -18   3   17.70    6.90
   1 -18   3    5.40    7.30
   1 -18   3   -0.70    5.10
  -1 -18  -3   17.20    9.90
   1  18   3   -7.70    5.60
  -1  18  -3    1.90    6.90
  -2 -18  -3   10.90   10.30
   2 -18   3    5.30    6.40
   2 -18   3   17.80    9.10
   2 -18   3   15.70    6.70
  -2 -18  -3   -3.80    8.00
  -2 -18  -3    7.30    7.30
   2  18   3   10.50    8.10
  -2  18  -3   12.00    7.00
   8   0  -4    1.20    8.40
  -8   0   4   -7.70    6.40
  -7   0   4   -1.20    4.50
   7   0  -4   -5.60    7.40
  -6   0   4   -5.80    4.40
   6   0  -4   13.30    6.10
  -5   0   4   -7.40    2.90
   5   0  -4    6.80    4.10
  -4   0   4    1.90    2.30
   4   0  -4   -1.90    2.60
   3   0  -4   -0.40    2.10
  -3   0   4    0.30    1.70
   2   0  -4  141.89    5.40
  -2   0   4  153.58    5.50
  -1   0   4   -0.20    0.80
   1   0  -4    0.60    0.80
   0   0  -4  278.57    7.90
   0   0   4  282.77    7.90
   1   0   4   -0.20    0.50
  -1   0  -4   -0.40    1.30
   1   0   4   -1.00    1.40
  -2   0  -4  360.96    8.10
   2   0   4  352.96   11.70
   2   0   4  358.46    8.10
  -2   0  -4  362.26   11.50
   3   0   4   -0.90    2.60
  -3   0  -4    0.80    1.00
  -3   0  -4   -0.20    2.50
   4   0   4   28.00    5.50
  -4   0  -4   15.30    2.20
  -4   0  -4   17.00    4.60
  -5   0  -4   -1.20    2.20
  -5   0  -4   -4.50    4.60
   5   0   4    1.70    5.30
  -6   0  -4   13.50    3.70
   6   0   4    6.20    5.50
  -6   0  -4   15.50    5.90
  -7   0  -4   13.10    9.20
   7   0   4  -16.30    8.10
  -7   0  -4    4.60    4.70
  -8  -1   4   -8.10    7.10
  -8  -1   4  -16.10    7.60
   8  -1  -4  -14.60   10.80
  -8   1   4   -1.20    6.00
   8   1  -4    6.70   11.20
  -7  -1   4   13.60    7.00
   7  -1  -4   13.50    8.00
   7   1  -4   20.60    8.30
  -7   1   4   19.70    6.90
  -6  -1   4   -3.80    3.20
   6  -1  -4  -12.00    4.60
   6   1  -4   -3.20    4.70
  -6   1   4    4.20    3.50
   5  -1  -4   -0.30    3.30
  -5  -1   4    2.40    3.40
   5   1  -4   -3.30    3.40
  -5   1   4   -2.80    2.20
   4  -1  -4  300.17   11.60
  -4  -1   4  309.47   11.30
   4   1  -4  304.17   11.70
  -4   1   4  310.37   11.00
  -3  -1   4  125.29    5.70
   3  -1  -4  123.09    6.30
   3   1  -4  115.29    6.10
  -3   1   4  126.49    6.00
  -2  -1   4   22.10    2.10
   2  -1  -4   18.20    2.50
  -2   1   4   20.90    2.50
   2   1  -4   20.20    2.40
  -1  -1   4   61.99    2.50
   1  -1  -4   60.89    3.00
  -1   1   4   58.79    2.90
   1   1  -4   61.79    2.60
   0  -1   4    6.60    1.40
   0  -1  -4    4.10    1.50
   0   1  -4    5.10    1.20
   1  -1   4   -0.30    0.40
  -1  -1  -4   -0.40    0.60
   1  -1   4   -0.40    1.30
  -1  -1  -4   -0.90    1.40
   1   1   4   -0.60    1.70
  -1   1  -4    1.80    1.10
   1   1   4   -0.50    0.60
   2  -1   4  235.68    8.80
  -2  -1  -4  238.58    6.50
  -2  -1  -4  248.58    9.30
   2   1   4  241.78    6.50
   2   1   4  235.68    9.40
  -2   1  -4  248.48    8.70
  -3  -1  -4   13.40    3.70
  -3  -1  -4    9.30    1.70
   3  -1   4    6.20    3.10
   3   1   4    8.50    3.00
  -3   1  -4    6.30    1.00
  -3   1  -4    6.40    2.80
   4  -1   4    8.40    4.20
  -4  -1  -4    0.10    1.60
  -4  -1  -4   -0.50    3.60
  -4   1  -4    1.60    1.30
  -4   1  -4    0.40    2.20
   4   1   4   -4.50    3.40
   5  -1   4   -6.80    4.60
  -5  -1  -4    1.20    2.50
  -5  -1  -4   -7.70    3.80
   5   1   4   -2.70    4.40
  -5   1  -4    1.30    2.00
  -5   1  -4    4.30    4.90
  -6  -1  -4   32.00    4.80
  -6  -1  -4   29.50    8.80
   6  -1   4   31.50    8.40
  -6   1  -4   47.00    8.90
  -6   1  -4   30.30    4.20
   6   1   4   35.40    9.30
   7  -1   4  -21.50    8.90
  -7  -1  -4   -2.20    6.80
  -7  -1  -4    8.80    5.40
   7   1   4   -4.60    7.70
  -7   1  -4   -0.60    9.00
  -7   1  -4    3.00    4.20
  -8  -2   4   17.20    8.10
   8  -2  -4  -11.20   10.70
  -8  -2   4  -13.10    8.20
  -8   2   4    7.40    7.80
   8   2  -4   18.20   11.70
  -7  -2   4    9.30    7.10
   7  -2  -4   13.10    5.90
  -7  -2   4   -0.90    5.20
  -7   2   4   -4.90    5.80
   7   2  -4   -0.40    7.40
   6  -2  -4   10.50    5.20
  -6  -2   4   -5.80    4.80
  -6   2   4    5.20    4.70
   6   2  -4    1.00    4.00
   5  -2  -4    1.90    3.40
  -5  -2   4    4.50    3.60
   5   2  -4    1.90    3.00
  -5   2   4    7.10    3.00
   4  -2  -4   10.90    3.10
  -4  -2   4   10.70    3.40
   4   2  -4   12.80    3.10
  -4   2   4   10.00    2.50
  -3  -2   4   79.39    4.80
   3  -2  -4   69.69    4.80
  -3   2   4   77.59    4.70
   3   2  -4   73.29    5.00
   2  -2  -4    1.60    1.50
  -2  -2   4    0.10    1.10
  -2   2   4    0.00    1.40
   2   2  -4    1.30    1.40
   1  -2  -4   14.80    1.70
  -1  -2   4   15.40    1.20
   1   2  -4   15.50    1.40
  -1   2   4   18.90    2.10
   0  -2  -4  248.08    7.20
   0  -2   4  250.27    6.10
   0  -2  -4  246.48    8.30
   0   2   4  255.27    7.00
   1  -2   4   30.70    2.60
  -1  -2  -4   32.60    2.20
  -1  -2  -4   31.60    3.50
   1   2   4   32.80    2.30
  -1   2  -4   31.40    2.40
   1   2   4   34.20    3.70
  -2  -2  -4   71.19    5.50
  -2  -2  -4   76.09    3.50
   2  -2   4   73.79    4.80
   2   2   4   80.49    6.00
   2   2   4   74.09    3.50
  -2   2  -4   74.79    4.40
   3  -2   4    8.30    2.90
  -3  -2  -4   12.90    3.80
  -3  -2  -4   10.90    2.00
   3   2   4   11.10    3.50
  -3   2  -4    6.80    2.50
   3   2   4    7.50    1.80
   4  -2   4    2.40    3.10
  -4  -2  -4    1.30    3.90
  -4  -2  -4    2.80    2.10
  -4   2  -4    0.90    3.30
  -4   2  -4    1.10    1.00
   4   2   4    7.50    4.30
  -5  -2  -4   -2.70    2.60
   5  -2   4   -0.70    5.60
  -5  -2  -4    6.00    4.20
  -5   2  -4    2.40    4.50
   5   2   4   -9.80    4.90
  -5   2  -4    0.90    1.60
   6  -2   4   -1.30    6.90
  -6  -2  -4   -6.00    4.50
  -6  -2  -4   -2.90    3.60
  -6   2  -4  -10.60    6.00
  -6   2  -4    0.50    2.60
   6   2   4   -8.10    6.80
   7  -2   4   12.90   10.50
  -7  -2  -4   10.50    5.60
  -7  -2  -4   10.70   10.40
   7   2   4    4.10   10.90
  -7   2  -4    1.00    8.50
  -7   2  -4   12.00    4.10
   8  -3  -4   -0.90   11.30
  -8  -3   4   -9.20    6.40
  -8  -3   4   -3.10    9.30
  -8   3   4   22.30    8.80
   8   3  -4    4.40    8.80
  -7  -3   4   44.90    7.00
  -7  -3   4   53.59    9.40
   7  -3  -4   49.10    9.90
  -7   3   4   44.90    7.30
   7   3  -4   35.80    9.80
  -6  -3   4   -2.10    4.00
  -6  -3   4    1.20    4.50
   6  -3  -4    4.70    5.20
  -6   3   4    2.10    3.30
   6   3  -4   -3.40    4.00
   5  -3  -4    9.10    4.80
  -5  -3   4    6.80    3.90
   5   3  -4    6.20    4.80
  -5   3   4   10.40    3.70
  -4  -3   4   90.59    6.20
   4  -3  -4   79.09    5.90
  -4   3   4   96.69    6.40
   4   3  -4   76.29    5.80
  -3  -3   4  114.89    5.70
   3  -3  -4  118.59    6.40
   3   3  -4  110.39    6.10
  -3   3   4  108.59    6.00
  -2  -3   4   57.69    3.30
   2  -3  -4   57.89    3.80
  -2   3   4   59.19    3.60
   2   3  -4   64.99    3.60
  -1  -3   4   14.10    1.10
   1  -3  -4   17.60    2.30
   1   3  -4   16.10    1.40
  -1   3   4   16.20    2.30
   0  -3  -4    1.30    1.10
   0  -3  -4   -0.90    1.30
   0   3   4    0.20    0.80
   0   3  -4    0.40    0.20
   1  -3   4  299.77    8.20
  -1  -3  -4  301.07    8.40
  -1  -3  -4  298.17   10.50
   1  -3   4  307.47    6.70
   1   3   4  300.97   10.40
   1   3   4  304.27    8.50
  -1   3  -4  308.27    8.00
  -2  -3  -4  358.96    9.70
   2  -3   4  331.27   10.60
  -2  -3  -4  364.46   12.50
   2   3   4  337.17   12.30
   2   3   4  363.76    9.70
  -2   3  -4  352.26   10.40
  -3  -3  -4    8.20    2.10
   3  -3   4    6.80    2.80
  -3  -3  -4    8.30    3.90
   3   3   4    4.50    3.90
  -3   3  -4    1.30    2.30
   3   3   4    2.20    1.50
  -4  -3  -4   13.50    2.90
  -4  -3  -4   24.50    5.00
   4  -3   4   17.50    5.00
  -4   3  -4   18.40    1.50
  -4   3  -4   18.60    4.30
   4   3   4   22.30    5.90
   5  -3   4   15.20    5.90
  -5  -3  -4   28.40    6.50
  -5  -3  -4   17.80    3.70
   5   3   4   18.50    6.60
  -5   3  -4   18.50    5.60
  -5   3  -4   20.80    2.50
  -6  -3  -4    7.80    6.70
   6  -3   4   10.00    7.60
  -6  -3  -4    1.30    4.30
  -6   3  -4   -2.30    5.70
   6   3   4   15.30    7.70
  -6   3  -4    0.80    2.40
  -7  -3  -4   -4.90   10.20
  -7  -3  -4   -0.30    5.40
   7  -3   4   -4.50   10.10
  -7   3  -4    5.00    3.30
  -7   3  -4  -14.10    8.30
   7   3   4    2.20   11.00
  -8  -4   4   -6.60   10.00
  -8  -4   4   25.30    8.90
   8  -4  -4   11.90   11.70
   8   4  -4   26.70   12.80
  -8   4   4    1.40    9.20
   7  -4  -4   23.80    8.90
  -7  -4   4   12.40    6.40
  -7  -4   4   21.60    7.90
   7   4  -4   10.60    8.00
  -7   4   4   17.00    7.30
  -6  -4   4   -2.70    4.80
  -6  -4   4   -0.30    3.40
   6  -4  -4    3.20    6.00
  -6   4   4    8.90    5.30
   6   4  -4   -4.60    4.20
  -5  -4   4   -4.10    3.10
  -5  -4   4    6.90    4.00
   5  -4  -4    3.30    4.40
  -5   4   4    8.30    3.90
   5   4  -4   -1.20    3.70
  -4  -4   4    0.00    2.40
   4  -4  -4   -1.60    3.00
  -4   4   4    0.90    2.60
   4   4  -4   -0.70    2.90
  -3  -4   4   36.10    3.70
   3  -4  -4   35.60    3.70
   3   4  -4   35.50    4.20
  -3   4   4   38.80    4.30
   2  -4  -4  235.08    8.30
  -2  -4   4  231.88    7.10
   2   4  -4  233.68    7.50
  -2   4   4  229.58    8.00
  -1  -4   4   22.80    2.60
  -1  -4   4   24.40    1.30
   1  -4  -4   22.50    2.80
  -1   4   4   22.30    2.60
   1   4  -4   21.70    1.50
  -1   4   4   22.90    2.20
   0  -4  -4    0.70    2.00
   0  -4   4    1.00    0.90
   0  -4  -4    1.40    1.40
   0  -4  -4    2.20    1.60
   0   4   4    1.60    1.10
  -1  -4  -4   33.00    4.50
   1  -4   4   31.50    1.80
   1  -4   4   29.30    2.50
  -1  -4  -4   26.20    2.90
   1   4   4   31.30    4.50
   1   4   4   31.50    2.90
  -2  -4  -4   85.59    4.60
  -2  -4  -4   89.29    6.40
   2  -4   4   83.19    4.90
  -2   4  -4   83.59    4.40
   2   4   4   86.89    4.40
   2   4   4   83.59    6.90
  -3  -4  -4  170.28    9.70
   3  -4   4  147.19    7.80
  -3  -4  -4  167.58    6.80
   3   4   4  171.48   10.00
   3   4   4  162.58    6.60
  -3   4  -4  159.78    7.40
  -4  -4  -4    8.00    4.90
  -4  -4  -4    1.20    2.30
   4  -4   4   -0.10    4.10
   4   4   4    4.40    2.30
  -4   4  -4    5.20    3.50
  -4   4  -4    3.90    0.60
   4   4   4    6.20    4.10
  -5  -4  -4    2.00    3.50
  -5  -4  -4   -6.70    5.10
   5  -4   4    6.00    5.60
  -5   4  -4    5.90    1.40
  -5   4  -4    3.50    4.90
  -5   4  -4    4.70    1.10
   5   4   4    7.10    5.20
   6  -4   4   10.90    7.20
  -6  -4  -4   -6.80    4.10
  -6  -4  -4    8.00    7.50
  -6   4  -4   -1.70    4.90
   6   4   4   18.40    8.70
  -7  -4  -4   13.10   10.10
  -7  -4  -4    5.10    5.70
   7  -4   4   -1.00    9.80
  -7   4  -4    2.70    2.90
  -7   4  -4    7.60    9.20
  -7   4  -4    0.40    2.30
   7   4   4   -5.50   11.80
   7  -5  -4   -8.00    7.50
  -7  -5   4   -0.20    5.90
  -7  -5   4   -5.80    6.20
   7   5  -4    0.60    6.20
  -7   5   4   -5.70    6.10
  -6  -5   4   14.20    6.20
   6  -5  -4   11.10    6.80
  -6  -5   4   21.90    4.90
   6   5  -4   11.60    5.70
  -6   5   4   26.10    6.30
   5  -5  -4   49.99    7.10
  -5  -5   4   53.89    6.70
  -5  -5   4   52.49    5.90
  -5   5   4   55.89    6.90
   5   5  -4   56.29    7.80
  -4  -5   4    6.80    3.20
   4  -5  -4    6.20    3.20
  -4  -5   4    9.40    2.90
   4   5  -4    9.60    4.00
  -4   5   4   12.10    3.20
   3  -5  -4   -1.00    2.20
  -3  -5   4   -1.70    2.10
  -3  -5   4   -0.40    1.80
   3   5  -4   -1.90    2.50
  -3   5   4   -0.60    2.30
  -2  -5   4    8.20    2.50
  -2  -5   4    5.80    1.60
   2  -5  -4    5.80    2.00
  -2   5   4    3.70    1.90
  -2   5   4    4.70    1.60
   2   5  -4    5.40    1.80
  -1  -5   4    0.10    0.60
  -1  -5   4    0.10    1.10
   1  -5  -4   -0.10    1.10
  -1   5   4    1.20    1.50
   1   5  -4   -0.10    0.80
  -1   5   4   -0.90    1.20
   0  -5  -4   85.49    5.90
   0  -5  -4   92.89    4.60
   0  -5   4   89.19    2.20
   0  -5   4   89.99    2.30
   0  -5   4   95.29    4.00
   0  -5  -4   91.49    4.40
   0   5   4   86.49    4.60
  -1  -5  -4   33.40    4.70
   1  -5   4   31.60    2.10
  -1  -5  -4   26.40    3.30
   1   5   4   29.70    3.10
   1   5   4   32.70    5.10
  -2  -5  -4   63.29    4.40
   2  -5   4   67.39    4.30
  -2  -5  -4   62.59    5.50
   2   5   4   63.49    5.70
  -2   5  -4   61.89    3.60
   2   5   4   57.99    4.10
  -3  -5  -4    6.30    4.00
  -3  -5  -4   -0.20    2.20
   3  -5   4    5.70    2.80
   3   5   4   -0.80    2.90
  -3   5  -4   -1.30    2.00
   3   5   4    1.00    1.80
  -4  -5  -4    8.00    3.00
   4  -5   4    6.50    4.00
  -4  -5  -4   12.50    4.70
  -4   5  -4   10.60    4.00
  -4   5  -4    9.20    0.80
   4   5   4   16.00    3.30
   4   5   4    7.50    4.70
  -5  -5  -4    0.80    3.70
  -5  -5  -4    6.10    5.00
   5  -5   4   10.20    5.80
   5   5   4   12.30    7.70
  -5   5  -4    7.90    1.40
  -5   5  -4    6.90    1.30
  -5   5  -4    3.00    4.20
  -6  -5  -4    6.80    4.60
   6  -5   4    0.00    5.40
  -6  -5  -4   -2.40    7.50
   6   5   4    8.50    7.00
  -6   5  -4    2.90    1.50
  -6   5  -4    6.20    5.80
  -6   5  -4    1.40    1.70
  -7  -5  -4    0.40    6.70
   7  -5   4   18.30   10.70
  -7  -5  -4    4.30    9.80
  -7   5  -4    3.30    2.10
   7   5   4   -2.00    9.60
  -7   5  -4    5.90    6.90
  -7   5  -4    0.70    1.90
  -7  -6   4  -11.10    6.70
  -7  -6   4    0.30    6.50
   7  -6  -4   -2.80    8.10
  -7   6   4    8.20    7.10
   7   6  -4    9.10    8.80
  -6  -6   4   -1.60    5.60
   6  -6  -4    6.00    4.60
  -6  -6   4    5.90    5.00
   6   6  -4    7.00    5.80
  -6   6   4    2.50    5.30
  -5  -6   4   28.90    5.50
   5  -6  -4   23.00    6.00
  -5  -6   4   26.60    5.50
  -5   6   4   22.60    5.00
   5   6  -4   15.40    5.50
  -4  -6   4   -0.30    2.80
   4  -6  -4   -4.40    3.20
  -4  -6   4    0.50    3.10
   4   6  -4   -1.70    3.10
  -4   6   4   -1.90    2.20
  -3  -6   4   25.80    3.50
   3  -6  -4   19.80    3.50
  -3  -6   4   25.80    4.20
  -3   6   4   23.60    3.90
   3   6  -4   25.50    3.90
  -2  -6   4  128.89    5.30
  -2  -6   4  126.19    6.40
   2  -6  -4  124.89    6.20
  -2   6   4  117.79    5.70
   2   6  -4  123.59    5.60
  -2   6   4  127.59    6.10
  -1  -6   4   -0.60    1.50
  -1  -6   4   -0.40    0.90
   1  -6  -4   -0.80    1.80
   1   6  -4    0.90    1.10
  -1   6   4    0.00    1.40
  -1   6   4    1.50    1.30
   0  -6  -4   47.40    3.90
   0  -6   4   43.40    2.00
   0  -6   4   45.00    1.70
   0  -6   4   48.00    3.30
   0  -6  -4   52.39    4.80
   0  -6  -4   39.90    3.40
   0   6   4   41.10    3.90
  -1  -6  -4   49.99    3.80
  -1  -6  -4   53.89    6.00
   1  -6   4   45.20    2.80
   1   6   4   47.80    4.00
   1   6   4   44.70    5.00
  -1   6  -4   43.50    2.70
  -2  -6  -4  134.19    8.00
  -2  -6  -4  145.39    6.70
   2  -6   4  137.69    6.10
   2   6   4  135.99    6.50
  -2   6  -4  137.29    4.20
  -2   6  -4  134.69    5.30
   2   6   4  134.59    8.20
  -3  -6  -4   -0.30    2.20
  -3  -6  -4    2.70    3.20
   3  -6   4   -3.00    2.30
   3   6   4    2.40    2.30
   3   6   4    2.00    3.70
  -3   6  -4   -1.00    2.00
  -3   6  -4    0.60    0.80
  -4  -6  -4   36.30    4.80
  -4  -6  -4   41.90    6.90
   4  -6   4   49.10    6.60
   4   6   4   36.60    8.20
   4   6   4   35.50    4.60
  -4   6  -4   39.50    1.80
  -4   6  -4   45.60    5.50
   5  -6   4    6.10    5.50
  -5  -6  -4    4.40    5.00
  -5  -6  -4   -2.20    3.40
  -5   6  -4    4.40    1.10
  -5   6  -4    3.90    4.50
   5   6   4    3.00    5.30
  -5   6  -4    3.50    1.10
  -6  -6  -4    5.30    4.60
   6  -6   4   -1.40    6.70
  -6  -6  -4   16.30    8.70
  -6   6  -4    0.60    1.20
  -6   6  -4    3.10    1.40
   6   6   4    3.00    9.80
  -6   6  -4    2.30    5.70
   7  -6   4    2.60   10.30
  -7  -6  -4   11.10   10.80
  -7  -6  -4   -6.60    6.80
   7   6   4   21.10   13.60
  -7   6  -4  -19.40    8.20
   7  -7  -4   -3.60    8.90
  -7  -7   4   11.00    7.90
  -7  -7   4   16.10    7.30
  -7   7   4   -2.50    7.50
   7   7  -4  -17.00    8.10
  -6  -7   4   -1.60    5.60
   6  -7  -4    5.50    6.10
  -6  -7   4  -12.30    5.20
   6   7  -4  -12.30    5.80
  -6   7   4   -0.80    5.80
  -5  -7   4    2.90    4.50
  -5  -7   4   -1.40    4.20
   5  -7  -4   -1.70    4.60
  -5   7   4   -1.70    4.30
   5   7  -4    7.90    5.00
  -4  -7   4   18.90    4.70
   4  -7  -4   19.80    4.90
  -4  -7   4   17.60    4.30
  -4   7   4   24.00    3.90
   4   7  -4   18.80    4.70
  -4   7   4   20.80    3.90
  -3  -7   4    2.90    2.60
   3  -7  -4    2.90    2.10
  -3  -7   4    0.20    2.20
  -3   7   4   -3.60    2.40
   3   7  -4   -0.20    2.60
  -3   7   4    0.80    2.30
  -2  -7   4   68.09    5.20
  -2  -7   4   65.19    4.20
   2  -7  -4   63.09    5.30
  -2   7   4   75.79    5.30
  -2   7   4   63.29    4.80
   2   7  -4   60.79    4.60
  -1  -7   4    4.30    1.40
  -1  -7   4    5.90    2.20
   1  -7  -4    6.10    2.50
  -1   7   4    4.60    2.40
  -1   7   4    9.60    2.70
   0  -7  -4   18.10    2.70
   0  -7  -4   19.90    4.00
   0  -7   4   12.00    2.40
   0  -7   4   16.30    1.30
   0  -7  -4   19.70    3.40
   0  -7   4   15.60    1.80
   0   7  -4   15.00    2.40
   0   7   4   13.10    2.60
  -1  -7  -4 1006.00   23.70
   1  -7   4  988.80   21.60
   1  -7   4  871.71   21.00
  -1  -7  -4  946.71   26.20
   1   7   4 1023.80   27.00
   1   7   4 1015.50   23.90
  -1   7  -4 1027.70   21.80
  -2  -7  -4    3.90    3.00
   2  -7   4    5.40    2.10
   2  -7   4    2.60    1.30
  -2  -7  -4    2.60    2.50
   2   7   4   10.40    4.60
   2   7   4    3.00    2.30
  -2   7  -4   10.10    2.00
  -2   7  -4    3.70    1.30
   3  -7   4    2.30    2.70
  -3  -7  -4    5.10    3.00
  -3  -7  -4   -2.30    2.80
   3   7   4   -1.10    1.70
  -3   7  -4   -0.50    1.80
  -3   7  -4    1.10    1.00
   3   7   4    0.70    4.50
  -4  -7  -4   30.30    4.90
  -4  -7  -4   36.00    6.90
   4  -7   4   34.20    5.80
  -4   7  -4   31.20    2.10
   4   7   4   25.80    4.60
   4   7   4   31.00    7.30
  -4   7  -4   33.30    4.80
  -5  -7  -4   21.90    6.70
  -5  -7  -4   14.80    4.50
   5  -7   4   23.60    6.50
   5   7   4   27.70    8.90
  -5   7  -4   22.90    5.40
  -5   7  -4   21.00    2.00
  -6  -7  -4  -11.80    8.30
   6  -7   4    5.20    7.10
  -6  -7  -4    4.90    4.80
  -6   7  -4    1.40    1.20
   6   7   4    2.10    9.70
  -6   7  -4   -1.20    5.40
   7  -8  -4  -15.00    8.80
  -7  -8   4    3.40    7.80
  -7  -8   4   -4.20    7.90
  -7   8   4   -5.00    5.40
   7   8  -4   -9.20   10.20
  -7   8   4    1.40    6.30
   6  -8  -4   24.60    7.80
  -6  -8   4   10.90    4.70
  -6  -8   4   13.20    6.40
  -6   8   4    6.60    6.00
  -6   8   4   12.30    5.10
   6   8  -4   -6.20    7.50
  -5  -8   4   -0.90    4.40
  -5  -8   4   -1.80    4.10
   5  -8  -4    9.40    5.60
   5   8  -4   10.80    5.70
  -5   8   4    9.70    3.60
  -5   8   4    5.30    4.60
  -4  -8   4   51.69    5.80
   4  -8  -4   49.40    6.50
  -4  -8   4   43.00    6.00
   4   8  -4   55.29    6.80
  -4   8   4   65.49    6.00
  -4   8   4   45.80    6.10
   3  -8  -4    7.30    3.10
  -3  -8   4    2.70    2.30
  -3  -8   4    2.60    2.80
  -3   8   4    1.40    2.10
  -3   8   4    1.50    2.40
   3   8  -4    3.80    3.10
   2  -8  -4   28.50    4.10
  -2  -8   4   29.90    3.60
  -2  -8   4   21.90    3.60
  -2   8   4   25.40    3.60
  -2   8   4   32.00    3.60
   2   8  -4   24.80    3.60
   1  -8  -4   25.90    3.80
   1  -8  -4   25.40    3.80
  -1  -8   4   20.50    2.60
  -1  -8   4   22.20    2.00
  -1  -8   4   26.70    3.10
  -1   8   4   24.80    3.70
   1   8  -4   26.60    3.60
   0  -8  -4   34.70    4.30
   0  -8   4   34.30    2.10
   0  -8   4   37.50    2.80
   0  -8  -4   36.60    5.90
   0  -8   4   40.60    3.60
   0  -8  -4   42.50    4.20
   0   8  -4   38.60    3.50
   0   8   4   33.90    4.30
  -1  -8  -4    5.50    2.70
   1  -8   4   -0.30    1.50
   1  -8   4    2.10    1.50
  -1  -8  -4    3.80    3.20
   1   8   4    2.70    4.10
  -1   8  -4    3.70    1.60
   1   8   4    2.20    1.70
   2  -8   4   -1.20    1.30
  -2  -8  -4    5.70    4.10
   2  -8   4    0.90    2.10
  -2  -8  -4   -0.90    1.80
  -2   8  -4    1.40    1.50
   2   8   4    1.60    4.80
   2   8   4    2.50    1.70
  -2   8  -4   -1.00    1.30
   3  -8   4    1.60    2.80
  -3  -8  -4    3.60    3.30
  -3  -8  -4    1.70    4.40
   3   8   4   -1.00    5.30
  -3   8  -4    2.30    2.20
  -3   8  -4   -1.70    1.30
   3   8   4   -0.40    2.70
  -4  -8  -4    2.50    3.90
   4  -8   4   -0.40    3.90
  -4  -8  -4    1.30    4.40
  -4   8  -4    1.40    1.40
   4   8   4    1.00    2.50
  -4   8  -4   -0.90    2.90
   4   8   4   -7.10    5.00
  -5  -8  -4    8.70    4.70
   5  -8   4   18.30    6.00
  -5  -8  -4   19.70    7.10
  -5   8  -4   18.40    4.80
  -5   8  -4   13.70    1.80
   5   8   4   20.00    9.20
  -6  -8  -4  -18.80    8.60
   6  -8   4    0.60    7.50
  -6  -8  -4   -1.70    5.60
  -6   8  -4    2.40    1.30
   6   8   4  -15.60   10.10
  -6   8  -4   -0.20    5.10
  -7  -9   4   -3.30    7.60
  -7  -9   4   12.10    8.90
   7  -9  -4   -9.50    9.20
   7   9  -4   -2.40   10.90
  -7   9   4   -6.80    8.70
  -7   9   4    0.00    6.20
  -6  -9   4    9.70    6.60
  -6  -9   4   19.50    7.20
   6  -9  -4   12.00    7.60
   6   9  -4    7.10    8.30
  -6   9   4    5.40    6.80
  -6   9   4   13.70    5.50
  -5  -9   4   17.00    5.30
  -5  -9   4   20.70    5.60
   5  -9  -4   21.30    6.50
  -5   9   4   13.30    4.90
   5   9  -4   20.60    6.80
  -5   9   4   19.40    5.10
  -4  -9   4    5.30    3.70
  -4  -9   4    5.00    4.50
   4  -9  -4    7.20    3.50
  -4   9   4   10.20    4.50
   4   9  -4    7.50    4.60
  -4   9   4    8.50    3.00
  -3  -9   4   -2.20    3.30
   3  -9  -4    1.90    3.30
  -3  -9   4    5.20    3.00
   3   9  -4   -0.60    3.20
  -3   9   4    2.60    2.90
  -3   9   4   -1.30    3.10
  -2  -9   4   60.59    5.10
   2  -9  -4   59.79    5.90
  -2  -9   4   56.89    4.80
  -2   9   4   56.59    5.50
  -2   9   4   54.29    5.40
   2   9  -4   52.49    5.00
   1  -9  -4    2.50    1.90
   1  -9  -4   -0.30    1.60
   1  -9  -4    2.20    4.00
  -1  -9   4    2.80    2.20
  -1  -9   4    0.50    1.30
  -1  -9   4   -1.50    1.70
   1   9  -4    2.10    2.30
  -1   9   4   -2.90    2.50
   0  -9  -4    8.10    3.80
   0  -9   4    4.10    2.30
   0  -9  -4    8.30    2.40
   0  -9   4    5.90    1.50
   0  -9  -4   10.30    2.90
   0  -9   4    7.00    1.90
   0   9   4    4.20    2.20
   0   9  -4    9.30    2.50
   1  -9   4   70.89    4.30
  -1  -9  -4   76.59    8.20
  -1  -9  -4   66.39    5.20
   1  -9   4   74.29    4.10
   1   9   4   73.09    7.10
  -1   9  -4   72.09    4.60
   1   9   4   67.29    5.20
  -1   9  -4   65.49    4.00
  -2  -9  -4   22.60    4.40
   2  -9   4   29.30    3.90
   2  -9   4   26.00    2.90
  -2  -9  -4   30.60    5.70
   2   9   4   24.90    4.40
  -2   9  -4   29.80    3.00
  -2   9  -4   32.30    3.20
   2   9   4   32.40    5.90
  -3  -9  -4   -3.20    5.30
   3  -9   4   -0.40    3.10
  -3  -9  -4   -0.80    2.30
  -3   9  -4    0.20    1.60
   3   9   4    2.40    4.80
   3   9   4    1.40    3.40
  -3   9  -4   -1.30    2.40
  -4  -9  -4   -0.70    3.90
  -4  -9  -4   10.20    6.70
   4  -9   4   -0.90    3.90
   4   9   4    5.60    6.90
   4   9   4   -1.90    3.80
  -4   9  -4    3.40    1.70
  -4   9  -4   -2.50    3.40
  -5  -9  -4    6.30    5.00
  -5  -9  -4  -13.20    7.40
   5  -9   4   13.90    5.50
  -5   9  -4    0.00    1.70
   5   9   4   -4.70   10.00
  -5   9  -4   -1.90    5.00
   5   9   4   -8.50    4.50
   6  -9   4   10.10    8.80
  -6  -9  -4   13.40    8.50
  -6  -9  -4    0.40    6.20
  -6   9  -4    0.30    1.40
  -6   9  -4   -0.30    1.50
   6   9   4   -0.60   12.90
  -6   9  -4   -1.80    6.70
  -6 -10   4   12.00    7.60
   6 -10  -4   11.80    6.40
  -6 -10   4   10.70    5.70
   6  10  -4   18.40    8.90
  -6  10   4    7.70    5.60
  -6  10   4    1.60    5.20
  -5 -10   4    5.60    5.20
  -5 -10   4   -2.90    3.50
   5 -10  -4    9.00    5.00
   5  10  -4   12.90    7.00
  -5  10   4    0.10    4.20
  -5  10   4    7.40    5.80
  -4 -10   4   -3.50    4.00
   4 -10  -4    0.20    4.60
  -4 -10   4   -6.50    3.90
   4  10  -4    2.50    5.30
  -4  10   4    8.00    3.80
  -4  10   4    1.90    3.30
  -3 -10   4   -5.40    3.10
   3 -10  -4   -3.30    3.30
  -3 -10   4    2.80    3.70
  -3  10   4    5.40    3.80
   3  10  -4    5.10    3.60
  -3  10   4   -0.80    3.40
   2 -10  -4    4.90    3.60
  -2 -10   4    9.60    2.80
  -2 -10   4   12.40    3.20
   2  10  -4    8.60    3.50
  -2  10   4    9.20    3.10
  -2  10   4    1.70    3.20
  -1 -10   4   17.60    2.50
  -1 -10   4   17.80    3.90
   1 -10  -4   22.10    5.40
   1 -10  -4    8.20    3.20
  -1 -10   4   13.80    2.80
   1 -10  -4   14.00    3.70
   1  10  -4   15.20    3.40
  -1  10   4   16.50    3.30
   0 -10   4   35.10    4.10
   0 -10  -4   46.60    6.90
   0 -10  -4   33.90    4.80
   0 -10   4   23.50    2.70
   0 -10   4   28.20    3.50
   0 -10  -4   34.50    4.00
   0  10  -4   34.30    4.10
   0  10   4   31.20    4.60
   1 -10   4    4.20    2.20
  -1 -10  -4    0.30    2.40
  -1 -10  -4   -2.30    2.10
   1 -10   4    2.30    1.80
  -1 -10  -4    7.70    5.00
   1  10   4    5.70    2.60
  -1  10  -4    4.80    2.20
   2 -10   4    9.40    2.80
  -2 -10  -4   20.20    6.40
  -2 -10  -4   12.50    3.50
   2 -10   4    8.50    2.40
   2  10   4   10.20    3.70
  -2  10  -4   11.00    2.50
   2  10   4    9.90    5.90
  -2  10  -4   10.70    2.50
  -3 -10  -4   11.80    4.70
   3 -10   4    6.70    3.90
  -3 -10  -4   19.10    5.60
  -3  10  -4   16.20    2.70
   3  10   4   13.80    4.50
  -3  10  -4   16.50    3.50
   3  10   4   19.70    7.90
  -4 -10  -4    2.60    4.50
  -4 -10  -4   14.10    7.50
   4 -10   4   -1.40    4.20
  -4  10  -4   10.00    3.90
   4  10   4   -0.20    4.00
   4  10   4    5.40    5.40
  -4  10  -4    4.40    2.20
  -5 -10  -4    7.10    5.50
  -5 -10  -4   -5.10    8.40
   5 -10   4    0.00    5.90
   5  10   4   -7.00    8.90
  -5  10  -4    0.70    5.30
  -5  10  -4    3.50    2.20
   5  10   4   11.10    5.70
  -6 -10  -4    9.10   10.80
   6 -10   4  -11.30    8.60
  -6 -10  -4   -1.50    7.00
  -6  10  -4    0.60    1.80
   6  10   4   -0.70   10.70
  -6  10  -4   -7.10    6.40
  -6 -11   4    2.40    8.30
  -6 -11   4   13.90    7.30
   6 -11  -4   16.80    8.80
  -6  11   4   15.00    6.20
  -6  11   4   16.70    8.20
   6  11  -4    4.80   10.00
  -5 -11   4   -3.30    5.00
  -5 -11   4    8.10    6.40
   5 -11  -4   -2.50    6.70
  -5  11   4   -3.90    3.60
  -5  11   4   -0.70    4.70
   5  11  -4    1.30    7.10
  -4 -11   4    2.60    3.70
  -4 -11   4   -0.50    4.50
   4 -11  -4   -5.00    3.20
  -4  11   4    3.60    5.10
   4  11  -4    2.10    5.50
  -4  11   4    2.20    4.40
  -3 -11   4   53.99    6.60
  -3 -11   4   54.79    6.10
   3 -11  -4   55.79    6.10
  -3  11   4   57.89    5.80
  -3  11   4   60.09    6.60
   3  11  -4   58.59    7.20
   2 -11  -4   16.10    4.60
  -2 -11   4   17.00    4.20
  -2 -11   4   13.30    3.80
  -2  11   4   17.60    4.50
   2  11  -4   21.50    3.90
  -2  11   4   22.90    4.30
  -1 -11   4    7.40    2.90
   1 -11  -4   11.90    5.00
  -1 -11   4    3.70    2.00
  -1 -11   4    3.50    2.60
   1 -11  -4    7.40    2.60
   1 -11  -4   10.40    3.80
   1  11  -4    4.40    3.10
  -1  11   4    0.10    3.30
   0 -11  -4   51.89    6.50
   0 -11  -4   66.39    5.40
   0 -11  -4   58.89    6.20
   0 -11   4   62.39    5.00
   0 -11   4   60.69    4.00
   0 -11   4   62.59    5.30
   0  11   4   64.79    6.30
   0  11  -4   66.59    5.40
  -1 -11  -4    5.60    4.10
   1 -11   4    1.70    2.40
   1 -11   4   -2.90    1.90
  -1 -11  -4   -2.00    3.20
  -1 -11  -4    2.30    3.30
  -1  11  -4    1.60    2.50
   1  11   4    1.60    3.50
  -2 -11  -4   39.50    8.00
   2 -11   4   36.50    4.20
   2 -11   4   33.40    4.40
  -2 -11  -4   35.80    5.90
   2  11   4   36.10    5.20
  -2  11  -4   40.00    4.00
   2  11   4   38.90    8.50
  -2  11  -4   39.10    4.40
  -3 -11  -4   47.70    9.10
  -3 -11  -4   59.99    7.40
   3 -11   4   72.19    6.90
  -3  11  -4   56.89    5.00
  -3  11  -4   69.69    5.60
   3  11   4   65.29    7.60
   3  11   4   65.49   10.40
  -4 -11  -4   27.40    8.50
  -4 -11  -4   27.20    6.30
   4 -11   4   21.30    5.30
   4  11   4   36.90   10.00
   4  11   4   15.60    4.60
  -4  11  -4   20.00    3.10
  -4  11  -4   22.40    4.60
  -5 -11  -4    3.30    9.70
  -5 -11  -4   -0.10    6.60
   5 -11   4   15.00    6.60
  -5  11  -4    7.50    2.80
  -5  11  -4    8.90    5.60
   5  11   4    9.50   10.70
   5  11   4    3.80    5.80
  -6 -12   4   -2.60    6.60
  -6 -12   4   -9.70    7.50
   6 -12  -4    8.10    7.00
  -6  12   4   20.70    8.10
   6  12  -4    3.20   11.20
  -6  12   4    8.40    6.60
  -5 -12   4   -3.20    4.70
  -5 -12   4   -2.20    6.00
   5 -12  -4   -3.30    5.10
  -5  12   4   -8.50    6.40
  -5  12   4   -0.80    5.60
   5  12  -4    6.00    8.40
  -4 -12   4    3.20    5.10
  -4 -12   4  -11.30    5.10
   4 -12  -4    2.50    5.20
   4  12  -4   14.00    6.10
  -4  12   4   -2.80    4.00
  -4  12   4    5.00    4.30
  -3 -12   4    4.90    4.50
  -3 -12   4    6.80    4.50
   3 -12  -4    4.00    4.50
  -3  12   4   10.60    4.80
   3  12  -4   10.30    4.70
  -3  12   4    3.90    4.40
  -2 -12   4    2.90    3.50
  -2 -12   4   -1.30    4.00
   2 -12  -4    3.30    4.20
  -2  12   4   -4.90    3.80
  -2  12   4    0.70    3.00
   2  12  -4    5.70    3.70
  -1 -12   4    0.60    2.70
  -1 -12   4    1.00    2.10
   1 -12  -4   -0.30    2.30
   1 -12  -4   -0.70    2.70
   1 -12  -4   -0.50    4.80
  -1  12   4   -2.40    2.60
   1  12  -4    2.90    2.60
   0 -12  -4   11.40    6.00
   0 -12   4   13.60    3.60
   0 -12   4    7.30    3.30
   0 -12  -4   10.80    4.40
   0 -12  -4   16.30    3.70
   0 -12   4   10.70    2.50
   0  12  -4   13.70    3.60
   0  12   4    6.50    4.20
   1 -12   4   18.80    3.10
  -1 -12  -4    9.80    4.50
   1 -12   4   11.60    4.20
  -1 -12  -4   13.40    4.60
   1 -12   4   15.80    3.70
  -1 -12  -4   26.50    6.20
   1  12   4   16.10    4.90
  -1  12  -4   24.20    4.10
   2 -12   4   15.30    3.30
  -2 -12  -4   22.30    4.70
   2 -12   4   23.80    4.10
  -2 -12  -4   31.30    7.70
  -2  12  -4   18.90    3.80
  -2  12  -4   15.30    3.10
   2  12   4   20.70    7.20
   2  12   4   11.40    4.80
   3 -12   4   58.89    7.00
  -3 -12  -4   68.89    8.80
  -3 -12  -4   55.49   10.20
  -3  12  -4   59.19    5.80
  -3  12  -4   62.79    5.80
   3  12   4   76.79   11.70
   3  12   4   73.59    8.60
   4 -12   4   23.40    5.50
  -4 -12  -4   15.70    6.60
  -4 -12  -4   43.70   10.30
  -4  12  -4   34.00    5.50
   4  12   4   18.60    8.80
  -4  12  -4   28.30    4.10
   4  12   4   22.80    6.20
  -5 -12  -4    9.80    7.40
  -5 -12  -4    3.40    9.70
   5 -12   4    5.20    6.80
  -5  12  -4   -6.80    5.60
   5  12   4   11.00    9.20
  -5  12  -4    4.20    3.20
   5  12   4    0.10    5.10
  -5 -13   4   13.90    7.20
   5 -13  -4    9.60    7.70
  -5 -13   4    4.00    7.50
   5  13  -4   -9.00    7.90
  -5  13   4    3.10    6.00
  -5  13   4   -3.50    5.30
  -4 -13   4    7.10    5.70
   4 -13  -4   10.40    6.30
  -4 -13   4   14.60    5.40
  -4  13   4   21.80    6.70
  -4  13   4   14.70    5.00
   4  13  -4    9.20    7.10
   3 -13  -4   44.10    7.20
  -3 -13   4   47.00    7.60
  -3 -13   4   49.10    7.00
  -3  13   4   41.20    6.20
  -3  13   4   38.50    7.10
   3  13  -4   50.39    7.80
   2 -13  -4   -7.50    4.00
  -2 -13   4   -0.20    4.50
  -2 -13   4    1.30    4.10
  -2 -13   4   -1.00    2.70
  -2  13   4    2.30    4.90
   2  13  -4    0.50    3.10
  -1 -13   4    0.10    3.60
  -1 -13   4   -0.10    2.50
   1 -13  -4   -1.50    3.40
  -1 -13   4   -2.10    3.10
   1 -13  -4   -0.90    4.00
   1 -13  -4   -5.30    4.30
  -1  13   4   -0.70    3.70
   1  13  -4   -0.40    3.60
   0 -13   4   19.90    4.40
   0 -13   4   19.60    4.60
   0 -13  -4   18.40    5.00
   0 -13  -4   33.50    7.50
   0 -13  -4   25.20    4.60
   0 -13   4   21.40    3.40
   0  13  -4   27.60    5.00
   0  13   4   29.30    5.60
   1 -13   4    2.60    2.50
  -1 -13  -4   -0.40    2.90
  -1 -13  -4    0.40    4.30
   1 -13   4    4.40    3.40
  -1 -13  -4    9.60    6.80
   1 -13   4   -0.70    3.80
   1  13   4    9.60    4.90
  -1  13  -4    4.80    3.50
   2 -13   4    3.50    2.80
  -2 -13  -4    2.60    7.20
   2 -13   4    5.40    3.30
  -2 -13  -4   -1.60    4.60
  -2  13  -4    0.50    2.60
  -2  13  -4    1.10    3.10
   2  13   4   -1.10    3.30
  -3 -13  -4   61.19   10.60
   3 -13   4   61.19    7.40
  -3 -13  -4   40.20    7.40
   3  13   4   29.90    6.00
   3  13   4   50.19    9.80
  -3  13  -4   41.10    5.20
  -3  13  -4   49.60    6.00
   4 -13   4   11.30    5.90
  -4 -13  -4    0.80    5.00
  -4 -13  -4    5.50    9.40
   4  13   4    3.70   11.70
   4  13   4    4.20    5.80
  -4  13  -4    4.00    4.30
  -5 -13  -4    2.40    7.20
   5 -13   4    4.10    7.80
  -5 -13  -4   -5.40   11.30
  -5  13  -4   12.10    4.10
   5  13   4   15.70    8.10
  -5  13  -4    2.40    6.20
   5  13   4    1.70   14.20
  -5 -14   4   -4.50    6.90
  -5 -14   4   -5.10    6.30
   5 -14  -4    6.30    8.90
  -5  14   4   11.80    8.50
   5  14  -4   -7.40    9.00
  -5  14   4   -5.00    6.60
   4 -14  -4   -1.30    6.40
  -4 -14   4    3.30    7.20
  -4 -14   4    4.90    6.60
  -4  14   4    2.90    5.20
   4  14  -4    7.60    7.70
  -4  14   4    4.30    5.90
  -3 -14   4    0.10    4.30
  -3 -14   4    2.30    5.40
   3 -14  -4    6.10    5.40
   3  14  -4   -9.80    5.80
  -3  14   4   -1.50    4.90
  -3  14   4   -1.20    5.20
  -2 -14   4   -2.50    4.00
   2 -14  -4   11.30    8.10
  -2 -14   4   -0.10    2.80
  -2 -14   4   -9.80    4.40
   2 -14  -4   -1.70    3.50
  -2  14   4   -6.00    3.50
   1 -14  -4   -3.00    3.00
  -1 -14   4    4.20    3.60
   1 -14  -4    2.60    5.50
   1 -14  -4   -3.20    3.20
  -1 -14   4   -3.40    4.00
  -1 -14   4   -0.80    2.50
  -1  14   4    6.40    4.70
   1  14  -4   -1.60    4.20
   0 -14   4   -1.70    2.70
   0 -14   4    6.30    4.20
   0 -14  -4   -2.50    3.30
   0 -14   4   -0.10    3.90
   0 -14  -4    4.60    6.00
   0 -14  -4    4.20    4.20
   0  14   4    3.00    4.80
   0  14  -4    2.80    4.10
  -1 -14  -4   -3.00    7.10
   1 -14   4    3.10    3.70
  -1 -14  -4   -1.00    4.70
   1 -14   4    6.60    3.00
   1 -14   4   10.60    4.50
  -1 -14  -4   -5.30    4.80
  -1  14  -4    4.80    4.20
   1  14   4   11.00    4.40
  -2 -14  -4    0.80    7.90
  -2 -14  -4   -0.70    5.10
   2 -14   4   -1.40    3.00
  -2 -14  -4   -1.70    3.90
   2 -14   4   -0.80    3.40
   2  14   4   -6.60    5.30
  -2  14  -4    3.40    3.90
  -3 -14  -4   21.70    5.90
  -3 -14  -4    2.70    8.70
   3 -14   4   20.00    5.60
  -3  14  -4   14.70    4.40
   3  14   4   31.00   11.20
   3  14   4   13.80    6.30
  -3  14  -4   11.80    4.20
  -4 -14  -4    5.30    6.90
   4 -14   4    9.00    6.20
  -4 -14  -4  -13.50    9.90
   4  14   4   -3.70   10.60
  -4  14  -4   -6.40    4.10
   4  14   4   -3.50    4.60
  -4  14  -4   11.10    5.40
   5 -15  -4   17.20    9.90
  -5 -15   4  -14.80    8.60
  -5 -15   4    8.30    8.30
  -5  15   4  -14.50    7.60
  -5  15   4    0.20    5.90
   5  15  -4   13.90   11.60
  -4 -15   4   41.00    8.60
  -4 -15   4   25.80    7.20
   4 -15  -4   43.50    8.80
  -4  15   4   32.00    8.60
   4  15  -4   34.60   10.20
  -4  15   4   42.80    8.40
  -3 -15   4   -1.30    5.50
  -3 -15   4    1.40    6.00
   3 -15  -4    1.90    5.00
  -3  15   4   -2.10    5.80
  -3  15   4   -5.10    5.50
  -2 -15   4    4.20    4.90
  -2 -15   4    3.50    3.60
  -2 -15   4    6.50    5.20
   2 -15  -4    3.20    6.00
   2 -15  -4  -11.50    7.70
   2  15  -4   10.80    4.90
  -2  15   4    7.70    5.50
  -1 -15   4    1.40    3.70
   1 -15  -4   -3.10    5.10
  -1 -15   4   -0.50    2.90
  -1 -15   4    0.80    4.30
   1 -15  -4   -1.10    3.40
   1 -15  -4    2.30    6.10
  -1  15   4    0.20    5.00
   1  15  -4    5.10    5.20
   0 -15  -4   -2.70    7.00
   0 -15   4   -3.70    2.90
   0 -15   4    9.50    5.00
   0 -15  -4    0.70    5.30
   0 -15  -4    1.50    4.70
   0 -15   4    6.50    4.80
   0  15   4    3.50    5.60
   0  15  -4    1.90    4.70
  -1 -15  -4   -1.40    4.10
  -1 -15  -4   20.70    9.10
  -1 -15  -4    0.20    5.20
   1 -15   4   -5.90    3.10
   1 -15   4    0.20    3.90
   1 -15   4    7.00    5.10
  -1  15  -4   -2.70    4.60
   1  15   4   -2.90    3.40
  -2 -15  -4   16.90    6.60
  -2 -15  -4   16.80    8.60
   2 -15   4    7.40    4.40
   2 -15   4   12.40    4.30
  -2 -15  -4   -3.80    6.10
   2  15   4    5.40    4.80
  -2  15  -4    3.30    4.10
  -3 -15  -4   14.20   10.00
  -3 -15  -4   12.30    7.10
   3 -15   4    6.80    5.70
   3  15   4   27.60   12.00
  -3  15  -4   14.40    5.00
   3  15   4   15.80    7.50
  -3  15  -4   23.60    5.20
  -4 -15  -4   17.50    8.90
   4 -15   4    3.70    7.50
  -4 -15  -4   -0.40   11.50
  -4  15  -4   13.10    5.60
   4  15   4    3.30    5.60
  -4  15  -4   -5.70    4.90
   4  15   4    6.50   13.10
  -4 -16   4   22.10    8.60
  -4 -16   4   13.80    9.50
   4 -16  -4   16.90    8.60
   4  16  -4   15.20   10.70
  -4  16   4   16.50    6.30
  -4  16   4   23.50    8.90
  -3 -16   4   39.60    6.10
   3 -16  -4   26.00    7.90
  -3 -16   4   42.00    8.20
  -3 -16   4   54.69    9.20
  -3  16   4   33.40    8.00
   2 -16  -4   12.90    9.50
   2 -16  -4    3.30    6.90
  -2 -16   4   -2.90    4.00
  -2 -16   4    5.00    6.10
  -2 -16   4   -4.60    5.80
  -2  16   4  -13.30    5.90
   2  16  -4   -2.30    4.40
  -1 -16   4   -1.00    5.50
   1 -16  -4   -1.90    7.90
   1 -16  -4   -3.50    3.70
  -1 -16   4    0.70    3.50
   1 -16  -4    9.10    5.50
  -1 -16   4    7.80    5.50
  -1  16   4    1.90    4.80
   1  16  -4   -0.90    5.30
   0 -16  -4    8.30    4.50
   0 -16  -4   -4.00    6.00
   0 -16   4    3.40    5.20
   0 -16   4   -0.50    3.60
   0 -16  -4    1.70    7.90
   0 -16   4   -4.00    5.20
   0  16   4   12.40    7.00
   0  16  -4    2.00    4.40
  -1 -16  -4   11.50   10.30
   1 -16   4    6.30    5.60
  -1 -16  -4   -4.90    6.20
   1 -16   4    5.20    5.00
  -1 -16  -4    4.00    6.40
   1 -16   4   -0.10    3.60
  -1  16  -4    4.20    5.50
   1  16   4    8.20    6.00
   2 -16   4    8.00    4.70
   2 -16   4   14.00    5.40
  -2 -16  -4    1.40    6.30
  -2 -16  -4    0.10    5.60
   2 -16   4    3.10    6.50
  -2 -16  -4   21.20   10.10
  -2  16  -4   17.70    5.70
   2  16   4   11.80    7.30
  -3 -16  -4   -5.50    7.50
   3 -16   4  -10.40    6.00
  -3 -16  -4  -20.40    9.90
  -3  16  -4    3.00    5.60
  -3  16  -4    5.00    4.60
   3  16   4    8.60    5.40
  -3 -17   4   13.40    6.50
  -3 -17   4   22.60    6.20
   3 -17  -4    3.50    8.10
  -3 -17   4   22.40    8.40
   3 -17  -4   -4.90   12.50
  -3  17   4   28.80    6.40
  -2 -17   4   11.90    6.80
  -2 -17   4    9.00    5.20
   2 -17  -4   19.30    8.40
   2 -17  -4   19.50    7.70
  -2 -17   4   29.80    8.10
   2  17  -4    3.40    5.70
  -2  17   4    9.10    5.60
  -1 -17   4    0.60    6.60
   1 -17  -4   12.20    9.30
   1 -17  -4    4.30    6.50
   1 -17  -4   -4.00    5.80
  -1 -17   4    3.90    4.30
  -1 -17   4    8.30    6.20
   1  17  -4    7.70    4.90
  -1  17   4    4.40    5.30
   0 -17  -4  -10.20    6.40
   0 -17   4    5.60    4.40
   0 -17   4    3.90    6.20
   0 -17  -4    4.70    6.20
   0 -17  -4   10.10    7.10
   0 -17   4   14.00    6.30
   0  17  -4    3.60    6.30
   0  17   4   -3.10    7.50
  -1 -17  -4   12.30    6.80
   1 -17   4    4.00    4.60
   1 -17   4    0.90    5.90
  -1 -17  -4    6.20    5.50
  -1 -17  -4    6.10   10.20
   1 -17   4    9.00    6.00
   1  17   4    1.30    7.10
  -1  17  -4    3.00    6.00
  -2 -17  -4   22.00    6.30
   2 -17   4   30.70    8.10
  -2 -17  -4   22.80    8.70
  -2 -17  -4   15.40   11.90
   2 -17   4   23.10    6.70
   2 -17   4   32.50    6.50
  -2  17  -4   26.20    6.70
   2  17   4   36.90    8.80
  -2 -18   4   10.20    5.80
  -2 -18   4   16.40    8.50
  -2 -18   4   14.70    7.10
   2 -18  -4   32.30    9.50
   2 -18  -4   14.10   11.70
   2  18  -4    3.30    7.50
  -2  18   4   16.10    8.10
   1 -18  -4    8.60   10.70
   1 -18  -4   10.20    7.90
  -1 -18   4    5.30    7.80
  -1 -18   4    1.80    5.10
  -1 -18   4    2.00    7.00
   1 -18  -4    5.90    7.00
   1  18  -4    0.80    7.60
  -1  18   4   15.10    8.30
   0 -18  -4   -2.30    6.00
   0 -18   4   -4.80    7.00
   0 -18  -4  -12.20   10.50
   0 -18  -4    3.60    7.40
   0 -18   4   -0.40    5.20
   0 -18   4    8.90    7.20
   0  18  -4    0.40    6.90
   0  18   4   11.00    7.90
  -1 -18  -4   -4.10   11.10
   1 -18   4   -8.00    7.00
   1 -18   4    2.20    6.50
  -1 -18  -4   -0.60    8.20
   1 -18   4   16.00    5.70
  -1 -18  -4   -2.90    7.80
  -1  18  -4   -1.30    6.30
   1  18   4   -4.40    5.80
   8   0  -5   -7.90    8.00
  -8   0   5   20.30    8.30
   7   0  -5    8.60    7.80
  -7   0   5   11.70    6.30
  -6   0   5    1.10    4.40
   6   0  -5   -2.50    4.80
  -5   0   5   -3.20    3.00
   5   0  -5   -1.20    3.40
  -4   0   5    1.30    2.50
   4   0  -5    1.40    2.50
   3   0  -5  445.26   13.30
  -3   0   5  468.95   13.10
  -2   0   5   -0.70    1.20
   2   0  -5    0.70    1.40
  -1   0   5   79.69    3.40
   1   0  -5   85.09    3.50
   0   0  -5   -1.40    0.90
   0   0  -5    1.00    0.90
   1   0   5   -2.30    1.80
   1   0   5    1.20    0.80
  -1   0  -5   -0.70    1.40
   2   0   5   -0.80    0.70
   2   0   5    1.60    2.20
  -2   0  -5   -2.10    1.60
  -3   0  -5   16.20    3.60
   3   0   5   15.00    4.30
  -3   0  -5   19.90    1.90
  -4   0  -5    2.80    3.90
   4   0   5   -9.10    3.40
   5   0   5   -5.20    5.60
  -5   0  -5    4.80    4.80
  -5   0  -5    5.90    2.30
  -6   0  -5   -1.70    2.90
  -6   0  -5    2.40    7.00
   6   0   5   -1.70    5.60
  -7   0  -5    3.90    4.20
   7   0   5   17.20   11.60
  -7   0  -5    0.70   10.20
  -8  -1   5   -1.30    7.40
   8  -1  -5    4.60   11.00
   8   1  -5   16.80   11.60
  -8   1   5   11.50    8.20
  -7  -1   5  -10.40    5.90
   7  -1  -5    7.80    7.90
   7   1  -5   -1.80    7.20
  -7   1   5    1.50    4.10
  -6  -1   5   -2.80    3.10
   6  -1  -5   -6.90    5.20
   6   1  -5    5.50    4.10
  -6   1   5   -3.60    4.20
  -5  -1   5    1.20    3.00
   5  -1  -5   -4.90    3.70
  -5   1   5   -2.40    2.90
   5   1  -5   -0.20    4.00
   4  -1  -5   63.59    6.10
  -4  -1   5   77.89    5.60
   4   1  -5   70.29    5.90
  -4   1   5   64.99    5.30
   3  -1  -5    1.70    2.40
  -3  -1   5    4.70    1.80
  -3   1   5    6.50    2.20
   3   1  -5    4.70    2.50
  -2  -1   5   10.10    1.80
   2  -1  -5   10.40    2.00
  -2   1   5   10.60    2.10
   2   1  -5    8.80    2.00
   1  -1  -5   44.20    2.80
  -1  -1   5   41.50    2.30
  -1   1   5   47.70    2.90
   1   1  -5   43.30    2.40
   0  -1  -5  199.18    6.20
   0  -1  -5  200.28    7.20
   0   1  -5  202.18    5.50
   0   1  -5  197.68    6.20
  -1  -1  -5   11.60    2.40
   1  -1   5   12.50    2.30
   1  -1   5   10.90    1.20
  -1   1  -5   10.00    1.90
   1   1   5    9.10    2.50
   1   1   5   10.00    1.40
   2  -1   5   49.99    1.60
   2  -1   5   50.09    4.40
  -2  -1  -5   50.39    4.70
  -2  -1  -5   47.50    2.70
   2   1   5   48.20    5.00
  -2   1  -5   57.69    4.30
   2   1   5   45.10    2.60
  -3  -1  -5    6.60    1.60
  -3  -1  -5    6.60    3.50
   3  -1   5    0.90    2.70
   3   1   5    8.60    3.80
   3   1   5    5.10    1.40
  -3   1  -5    6.40    2.90
   4  -1   5   -9.90    3.70
  -4  -1  -5   -3.30    3.60
  -4  -1  -5   -0.60    1.70
  -4   1  -5    5.40    2.80
  -4   1  -5    1.30    1.00
   4   1   5    3.40    4.70
  -5  -1  -5   11.20    4.90
  -5  -1  -5   11.30    2.80
   5  -1   5    2.90    5.40
  -5   1  -5    9.50    2.00
   5   1   5   15.70    6.20
  -5   1  -5    4.50    5.70
  -6  -1  -5    3.20    3.30
  -6  -1  -5    8.20    6.90
   6  -1   5    7.10    7.60
  -6   1  -5   -0.70    2.40
   6   1   5    2.60    7.40
  -6   1  -5    4.40    5.30
  -7  -1  -5    6.30   10.10
  -7  -1  -5   -5.30    4.40
   7  -1   5  -16.50   10.10
   7   1   5   -9.00   11.30
  -7   1  -5   -5.20    8.80
  -7   1  -5    2.20    3.20
   8  -2  -5   11.70   11.40
  -8  -2   5   -5.50    7.60
  -8  -2   5    4.90    8.50
  -8   2   5    0.20    8.20
   8   2  -5    0.00   10.90
   7  -2  -5    2.20    5.90
  -7  -2   5   -3.00    5.50
  -7   2   5   -2.00    5.00
   7   2  -5   -7.50    7.20
  -6  -2   5    7.10    5.00
   6  -2  -5   -1.70    3.80
  -6   2   5    2.30    4.10
   6   2  -5   -2.10    4.90
   5  -2  -5   -4.60    4.50
  -5  -2   5    1.40    3.30
  -5   2   5    2.20    2.50
   5   2  -5   -2.70    3.70
  -4  -2   5  125.19    7.00
   4  -2  -5  147.69    8.10
  -4   2   5  141.79    7.60
   4   2  -5  131.79    7.70
   3  -2  -5  141.99    6.60
  -3  -2   5  147.49    6.30
  -3   2   5  142.59    6.50
   3   2  -5  147.69    6.70
   2  -2  -5    1.10    1.70
  -2  -2   5   -0.40    1.00
  -2   2   5    0.30    1.20
   2   2  -5   -1.80    1.30
  -1  -2   5   20.70    1.50
   1  -2  -5   19.60    2.40
   1   2  -5   20.60    1.60
  -1   2   5   23.90    2.40
   0  -2  -5    1.90    1.60
   0  -2  -5    3.90    1.40
   0   2   5    4.30    1.30
   0   2  -5    2.70    0.80
   1  -2   5    3.20    1.50
  -1  -2  -5    0.60    2.10
   1   2   5    1.40    2.10
  -1   2  -5    4.70    1.50
   1   2   5    4.10    1.40
  -2  -2  -5   43.80    3.00
   2  -2   5   42.30    4.00
  -2  -2  -5   45.90    4.90
   2   2   5   44.40    5.40
  -2   2  -5   56.59    4.10
   2   2   5   50.59    3.10
  -3  -2  -5   12.70    4.20
  -3  -2  -5   16.10    2.30
   3  -2   5   12.80    3.80
   3   2   5   22.30    5.30
   3   2   5   15.40    2.10
  -3   2  -5   16.00    3.20
   4  -2   5    0.00    4.30
  -4  -2  -5   -0.20    1.90
  -4  -2  -5    2.50    3.10
   4   2   5   14.20    5.30
  -4   2  -5    1.70    3.90
  -5  -2  -5   -8.00    5.40
   5  -2   5   -1.60    5.20
  -5  -2  -5    2.50    2.60
   5   2   5    5.50    6.10
  -5   2  -5   -0.30    1.10
  -5   2  -5   -0.50    4.80
  -6  -2  -5    2.20    7.30
   6  -2   5   -4.30    7.10
  -6  -2  -5   -0.70    3.90
  -6   2  -5   -1.30    1.90
  -6   2  -5  -10.30    6.10
   6   2   5   -1.10    8.40
  -7  -2  -5   -5.70    9.20
   7  -2   5  -15.40    9.70
  -7  -2  -5   -1.00    5.20
  -7   2  -5    0.80    2.60
  -7   2  -5    6.60    9.60
   7   2   5    2.40   11.00
  -8  -3   5   -8.40    7.20
  -8  -3   5  -20.50    8.00
   8  -3  -5  -11.20   11.00
   8   3  -5   -2.80   11.30
  -8   3   5   21.20    9.20
  -7  -3   5    9.30    5.20
  -7  -3   5  -10.40    5.50
   7  -3  -5    0.10    7.30
  -7   3   5    4.20    6.30
   6  -3  -5   -1.10    5.40
  -6  -3   5   -6.20    4.00
   6   3  -5    4.20    5.30
  -6   3   5   -1.20    4.80
  -5  -3   5   19.10    4.80
   5  -3  -5   19.80    4.50
   5   3  -5   10.40    4.70
  -5   3   5   17.50    4.60
  -4  -3   5  117.29    6.70
   4  -3  -5   97.19    7.10
  -4   3   5  109.69    6.90
   4   3  -5   93.89    6.90
  -3  -3   5    2.00    1.70
   3  -3  -5   -1.30    1.50
  -3   3   5    0.90    1.60
   3   3  -5   -0.40    2.10
  -2  -3   5    5.30    1.40
   2  -3  -5    6.70    2.30
  -2   3   5    4.60    1.60
   2   3  -5    5.60    1.70
   1  -3  -5   82.89    4.40
  -1  -3   5   85.39    2.70
   1   3  -5   86.89    2.90
  -1   3   5   86.99    4.40
   0  -3  -5  816.22   19.20
   0  -3  -5  843.62   21.10
   0   3  -5  811.02   16.40
   0   3  -5  794.52   16.60
   0   3   5  858.61   19.00
  -1  -3  -5    1.60    2.30
   1  -3   5    1.70    0.70
  -1  -3  -5   -0.70    1.20
   1  -3   5    0.90    1.30
   1   3   5    0.20    1.30
   1   3   5   -0.10    2.60
  -1   3  -5    1.20    1.20
  -2  -3  -5    4.50    2.90
  -2  -3  -5    4.20    1.80
   2  -3   5    3.30    2.20
   2   3   5    4.30    1.70
   2   3   5    5.10    3.50
  -2   3  -5    1.40    1.60
   3  -3   5    6.20    3.20
  -3  -3  -5    3.40    3.70
  -3  -3  -5    6.40    2.10
  -3   3  -5    2.60    2.50
   3   3   5    3.00    1.80
   3   3   5    8.40    4.50
   4  -3   5    1.80    3.50
  -4  -3  -5    1.00    2.40
  -4  -3  -5    6.80    4.20
  -4   3  -5    3.50    3.10
   4   3   5   -1.50    4.70
  -5  -3  -5   11.90    3.60
  -5  -3  -5   15.10    5.30
   5  -3   5    3.80    6.20
  -5   3  -5   14.80    5.90
   5   3   5   12.60    5.80
   6  -3   5   14.10    8.40
  -6  -3  -5    0.70    4.10
  -6  -3  -5    5.70    6.90
   6   3   5   -8.20    8.30
  -6   3  -5    9.70    7.00
  -7  -3  -5    0.10    5.90
   7  -3   5    7.30   10.80
  -7  -3  -5    1.10    8.30
   7   3   5   -5.30    8.50
  -7   3  -5    1.20    9.20
  -7  -4   5    2.40    6.60
   7  -4  -5   11.10    8.20
  -7  -4   5   -5.50    6.40
   7   4  -5   -4.50    8.10
  -7   4   5    0.10    6.20
   6  -4  -5    6.10    6.20
  -6  -4   5   -6.90    4.50
  -6  -4   5    7.40    5.10
  -6   4   5   -1.80    4.60
   6   4  -5    1.50    5.40
   5  -4  -5   14.90    5.20
  -5  -4   5   10.10    3.70
   5   4  -5   17.30    5.20
  -5   4   5    9.30    4.40
   4  -4  -5   38.00    4.80
  -4  -4   5   48.60    5.00
  -4   4   5   42.90    5.50
   4   4  -5   42.60    5.60
  -3  -4   5   13.40    2.60
   3  -4  -5   13.80    3.30
   3   4  -5   11.50    3.10
  -3   4   5   14.10    2.80
   2  -4  -5    5.20    2.00
  -2  -4   5    6.10    1.50
   2   4  -5    3.00    1.70
  -2   4   5    4.10    2.30
  -1  -4   5    1.50    0.50
   1  -4  -5    2.10    1.50
   1   4  -5    2.10    0.70
  -1   4   5    0.20    1.50
  -1   4   5    5.10    1.60
   0  -4  -5   39.30    3.20
   0  -4  -5   39.20    4.00
   0  -4   5   36.30    2.70
   0   4   5   38.80    3.30
   1  -4   5  176.58    5.00
  -1  -4  -5  189.78    6.70
  -1  -4  -5  191.28    8.90
   1   4   5  195.28    6.90
   1   4   5  181.28    8.60
  -2  -4  -5   78.89    4.60
   2  -4   5   95.19    5.30
  -2  -4  -5   83.09    6.10
   2   4   5   78.79    6.20
  -2   4  -5   79.19    4.50
   2   4   5   81.29    4.60
   3  -4   5   -1.20    2.70
  -3  -4  -5   -0.20    2.80
  -3  -4  -5    0.80    1.90
  -3   4  -5    3.30    2.50
   3   4   5   -1.90    3.10
   3   4   5    1.50    1.80
   4  -4   5    4.40    4.40
  -4  -4  -5    4.80    3.00
  -4  -4  -5   10.70    5.60
   4   4   5    4.40    5.00
  -4   4  -5    3.40    3.80
   4   4   5    7.70    2.60
  -5  -4  -5   -9.70    5.90
  -5  -4  -5   -2.20    3.20
   5  -4   5    6.50    5.70
  -5   4  -5   -2.70    4.30
   5   4   5    1.80    7.20
   6  -4   5    3.40    7.20
  -6  -4  -5    6.60    6.50
  -6  -4  -5    4.10    4.70
   6   4   5    0.70    7.10
  -6   4  -5   -2.10    6.70
  -7  -4  -5   22.50    6.90
  -7  -4  -5   38.30    9.00
   7  -4   5   26.60   11.50
   7   4   5   25.50   11.60
  -7   4  -5   12.20    9.80
   7  -5  -5   14.20    7.90
  -7  -5   5   -6.80    4.50
  -7  -5   5   -4.40    6.20
   7   5  -5   11.70    8.40
  -7   5   5   -7.30    6.30
  -6  -5   5   17.60    6.30
   6  -5  -5   16.90    5.50
  -6  -5   5    8.70    5.50
   6   5  -5    8.50    6.10
  -6   5   5   14.20    5.80
  -5  -5   5  178.38   10.40
  -5  -5   5  170.98    9.60
   5  -5  -5  151.08    9.40
   5   5  -5  171.58   10.70
  -5   5   5  169.98    9.60
  -4  -5   5    4.00    3.40
  -4  -5   5    2.10    2.70
   4  -5  -5   -3.30    3.00
   4   5  -5    1.40    3.10
  -4   5   5   -1.30    2.20
  -3  -5   5    7.30    3.10
  -3  -5   5    8.90    2.50
   3  -5  -5   10.10    2.70
   3   5  -5    7.50    2.70
  -3   5   5    7.00    2.60
  -2  -5   5   15.90    2.10
  -2  -5   5   18.50    3.20
   2  -5  -5   17.20    3.30
   2   5  -5   15.60    2.40
  -2   5   5   20.40    3.20
  -1  -5   5    1.00    1.70
   1  -5  -5    0.30    2.00
  -1  -5   5    1.60    0.40
   1   5  -5    1.50    0.50
  -1   5   5    2.30    1.90
  -1   5   5   -0.80    1.70
   0  -5  -5   39.90    5.10
   0  -5   5   37.00    2.90
   0  -5  -5   39.30    3.90
   0  -5  -5   34.60    3.50
   0   5   5   34.40    2.90
  -1  -5  -5  254.57   10.90
   1  -5   5  247.98    6.60
  -1  -5  -5  260.67    8.50
   1  -5   5  251.67    7.20
   1   5   5  242.38    8.60
   1   5   5  251.57   11.00
   2  -5   5    3.10    2.30
  -2  -5  -5    3.10    2.20
  -2  -5  -5    3.30    3.40
   2   5   5   10.20    4.30
  -2   5  -5    1.30    1.50
   2   5   5    6.30    2.30
  -3  -5  -5   50.59    4.70
   3  -5   5   48.70    5.40
  -3  -5  -5   56.39    7.50
   3   5   5   50.19    4.40
  -3   5  -5   50.59    4.60
   3   5   5   50.19    7.20
   4  -5   5   -2.80    3.70
  -4  -5  -5   -4.00    5.10
  -4  -5  -5   -4.60    2.80
   4   5   5    0.70    2.30
  -4   5  -5    0.50    3.40
   4   5   5   -1.30    5.60
   5  -5   5   14.40    5.90
  -5  -5  -5    7.00    3.90
  -5  -5  -5   18.40    7.50
  -5   5  -5   13.40    5.40
   5   5   5   15.90    6.60
  -6  -5  -5    6.90    6.30
  -6  -5  -5   -1.20    4.60
   6  -5   5    1.60    7.20
   6   5   5   10.10   10.20
  -6   5  -5    3.60    6.60
   7  -6  -5    4.90    8.70
  -7  -6   5   16.10    7.70
  -7  -6   5  -10.70    6.00
   7   6  -5   -7.00    7.40
  -7   6   5   -4.30    7.60
   6  -6  -5   13.00    5.30
  -6  -6   5   -3.90    5.10
  -6  -6   5   -8.90    4.90
   6   6  -5   13.30    6.70
  -6   6   5    0.90    5.80
  -5  -6   5    1.60    4.30
  -5  -6   5    2.20    3.40
   5  -6  -5   -1.30    3.30
   5   6  -5    3.40    4.30
  -5   6   5    0.90    4.20
  -4  -6   5    3.10    2.60
  -4  -6   5    6.30    3.30
   4  -6  -5    8.00    3.70
  -4   6   5    4.10    2.70
   4   6  -5    0.10    3.20
  -3  -6   5   55.99    4.50
   3  -6  -5   49.40    4.90
  -3  -6   5   54.99    4.80
  -3   6   5   49.40    5.10
   3   6  -5   53.79    5.00
  -2  -6   5   37.20    3.80
   2  -6  -5   37.20    3.80
  -2  -6   5   43.20    3.00
  -2   6   5   38.30    4.20
   2   6  -5   38.40    3.30
  -2   6   5   34.40    4.00
  -1  -6   5   91.39    4.90
  -1  -6   5   88.39    2.50
   1  -6  -5   85.89    5.10
  -1   6   5   87.39    5.30
  -1   6   5   85.09    4.80
   0  -6  -5   80.59    4.80
   0  -6  -5   67.29    5.60
   0  -6  -5   81.89    4.90
   0  -6   5   77.09    4.10
   0   6   5   72.89    4.50
  -1  -6  -5    5.30    2.30
   1  -6   5    8.80    1.60
  -1  -6  -5    5.90    3.60
   1  -6   5    6.00    1.50
   1   6   5    8.10    2.40
   1   6   5    9.10    3.80
   2  -6   5   11.70    2.70
  -2  -6  -5   13.60    2.70
  -2  -6  -5   11.60    4.30
   2   6   5   13.60    2.80
   2   6   5   17.20    5.00
  -2   6  -5   10.30    2.10
  -3  -6  -5    0.50    4.30
   3  -6   5   -1.20    2.70
  -3  -6  -5    1.40    2.80
  -3   6  -5    2.30    2.30
   3   6   5   -2.40    1.90
   3   6   5    2.30    5.30
   4  -6   5    3.00    4.40
  -4  -6  -5    6.80    3.30
  -4  -6  -5    6.90    6.00
   4   6   5    6.20    4.90
  -4   6  -5    4.50    3.50
   4   6   5    8.70    3.20
  -5  -6  -5    1.50    3.70
  -5  -6  -5   -0.20    6.60
   5  -6   5    4.80    5.80
  -5   6  -5   -3.20    4.80
   5   6   5    1.10    8.00
  -6  -6  -5    2.50    5.70
  -6  -6  -5   -8.90    6.10
   6  -6   5    9.30    7.60
  -6   6  -5   10.60    6.80
   6   6   5  -19.10    9.70
   7  -7  -5    4.50   10.30
  -7  -7   5    5.30    6.10
  -7  -7   5  -10.90    5.90
   7   7  -5   11.90    8.30
  -7   7   5    1.60    5.80
  -6  -7   5   -9.00    3.60
   6  -7  -5    8.80    5.50
  -6  -7   5    7.80    6.00
   6   7  -5   -3.90    6.20
  -6   7   5    0.50    6.10
  -5  -7   5   15.80    5.00
  -5  -7   5   25.90    5.60
   5  -7  -5   15.70    4.60
   5   7  -5   20.30    5.40
  -5   7   5   12.30    4.50
   4  -7  -5    9.90    4.40
  -4  -7   5    8.60    3.60
  -4  -7   5    7.50    3.20
   4   7  -5    2.60    3.50
  -4   7   5   -1.20    3.40
  -3  -7   5   36.30    5.00
   3  -7  -5   35.40    4.20
  -3  -7   5   41.00    4.20
  -3   7   5   38.90    4.00
   3   7  -5   37.20    4.60
  -3   7   5   31.80    4.50
   2  -7  -5    0.60    2.70
  -2  -7   5    1.70    1.40
  -2  -7   5    0.00    2.50
   2   7  -5    1.90    2.00
  -2   7   5   -0.80    1.30
  -2   7   5   -2.80    2.00
   1  -7  -5   49.90    4.30
  -1  -7   5   47.90    2.00
  -1  -7   5   47.90    4.10
  -1  -7   5   47.80    1.80
  -1   7   5   48.10    4.60
   0  -7  -5   64.09    5.10
   0  -7   5   57.89    1.90
   0  -7   5   59.79    3.90
   0  -7  -5   61.59    5.90
   0  -7  -5   57.89    4.60
   0  -7   5   58.59    1.80
   0   7   5   61.29    4.80
  -1  -7  -5   13.10    3.10
  -1  -7  -5   11.40    4.30
   1  -7   5   11.90    1.80
   1  -7   5    9.80    1.80
   1   7   5   14.50    2.80
   1   7   5    8.90    3.80
  -2  -7  -5   54.69    4.90
  -2  -7  -5   56.09    6.20
   2  -7   5   71.59    4.70
  -2   7  -5   65.59    3.80
   2   7   5   62.49    5.30
   2   7   5   64.19    7.00
  -3  -7  -5   13.90    3.50
  -3  -7  -5   21.70    5.80
   3  -7   5   15.20    3.90
   3   7   5   17.80    5.10
   3   7   5   11.60    3.30
  -3   7  -5   17.60    3.00
  -4  -7  -5   -4.40    3.40
   4  -7   5   -0.60    4.30
  -4  -7  -5    1.90    5.90
   4   7   5    0.50    3.20
  -4   7  -5    2.60    3.10
   4   7   5    6.80    7.40
  -5  -7  -5   15.00    8.10
  -5  -7  -5    4.40    4.50
   5  -7   5    6.00    6.20
  -5   7  -5    8.90    5.00
   5   7   5    4.90    6.60
  -6  -7  -5   -5.50    6.80
   6  -7   5    0.60    8.00
  -6  -7  -5   10.30    6.00
  -6   7  -5    7.20    6.20
   6   7   5   12.60    8.70
  -7  -8   5    7.80    7.50
  -7  -8   5   11.40    8.50
   7  -8  -5    5.80    9.60
   7   8  -5  -16.60    9.10
  -7   8   5   -2.00    7.90
  -6  -8   5   -2.80    6.20
   6  -8  -5    5.60    7.00
  -6  -8   5    2.80    6.00
   6   8  -5   -2.50    7.00
  -6   8   5    3.80    4.80
  -5  -8   5   -2.20    4.20
  -5  -8   5    0.30    3.70
   5  -8  -5   -0.10    4.70
  -5   8   5    4.00    4.10
   5   8  -5   -1.90    5.60
  -5   8   5    0.50    4.60
  -4  -8   5    9.50    3.90
  -4  -8   5    0.00    2.90
   4  -8  -5    3.90    4.00
  -4   8   5    4.50    2.40
   4   8  -5   -4.90    3.60
  -4   8   5    0.90    2.90
  -3  -8   5   21.50    4.30
   3  -8  -5   15.70    4.10
  -3  -8   5   18.90    3.10
  -3   8   5   20.30    4.20
  -3   8   5   21.00    4.20
   3   8  -5   17.50    3.80
   2  -8  -5    8.10    2.80
  -2  -8   5    8.40    3.10
  -2  -8   5   12.00    2.30
  -2   8   5   15.80    3.60
   2   8  -5   12.20    2.70
  -2   8   5   11.30    3.40
  -1  -8   5   -0.20    1.00
  -1  -8   5    0.80    1.50
   1  -8  -5   -1.00    2.40
  -1  -8   5    0.50    0.70
   1  -8  -5   -7.00    3.70
  -1   8   5    0.20    2.20
   0  -8  -5   36.10    6.10
   0  -8   5   29.80    1.60
   0  -8  -5   27.40    4.10
   0  -8   5   26.90    2.00
   0  -8   5   29.40    3.50
   0  -8  -5   31.00    4.60
   0   8   5   26.70    4.00
   1  -8   5   12.40    1.90
   1  -8   5   11.90    2.20
  -1  -8  -5   14.80    4.40
  -1  -8  -5   18.70    3.70
   1   8   5   14.30    5.50
   1   8   5   12.80    3.10
  -1   8  -5   12.10    2.20
   2  -8   5   52.59    3.10
   2  -8   5   49.60    4.30
  -2  -8  -5   47.10    4.40
  -2  -8  -5   49.10    7.70
   2   8   5   48.10    8.30
  -2   8  -5   47.40    3.10
  -2   8  -5   47.80    3.60
   2   8   5   42.60    5.30
  -3  -8  -5    3.50    3.40
  -3  -8  -5   -1.10    3.40
   3  -8   5   -0.70    3.10
   3   8   5    0.20    2.90
  -3   8  -5   -0.70    1.00
  -3   8  -5    2.60    2.40
   3   8   5   -5.90    5.50
  -4  -8  -5   -0.80    4.00
   4  -8   5    9.20    4.60
  -4  -8  -5   -4.10    6.50
  -4   8  -5    5.90    3.10
   4   8   5   -2.20    4.70
   4   8   5    1.20    3.40
  -5  -8  -5    5.10    4.60
  -5  -8  -5   11.00    8.60
   5  -8   5    3.60    6.40
   5   8   5    1.40    9.60
   5   8   5    7.50    4.30
  -5   8  -5   -7.20    4.10
  -6  -8  -5    7.70    6.60
   6  -8   5    2.90    8.10
  -6  -8  -5   -8.40    9.50
   6   8   5   -8.60   12.10
  -6   8  -5    9.40    6.60
   7  -9  -5   -2.40    8.00
  -7  -9   5   -5.50    8.30
  -7  -9   5   -1.10    6.70
  -7   9   5    8.50    6.60
   7   9  -5    4.70   10.60
  -7   9   5    8.00    9.10
  -6  -9   5    9.80    7.10
   6  -9  -5   11.90    7.80
  -6  -9   5    3.70    7.00
  -6   9   5    6.30    6.70
  -6   9   5   11.00    4.90
   6   9  -5    6.30    7.70
   5  -9  -5    5.60    6.20
  -5  -9   5   19.20    5.50
  -5  -9   5   15.10    4.30
  -5   9   5   15.40    5.30
   5   9  -5   12.60    6.60
  -5   9   5   17.70    5.10
  -4  -9   5   -0.10    3.00
   4  -9  -5    0.40    3.20
   4   9  -5    0.80    4.60
  -4   9   5    9.60    4.00
  -4   9   5    1.60    4.10
  -3  -9   5   -2.50    2.60
  -3  -9   5    1.00    2.60
   3  -9  -5    2.30    3.60
  -3   9   5    3.40    3.50
  -3   9   5   -5.30    2.80
   3   9  -5   -6.00    3.10
   2  -9  -5    1.60    2.60
  -2  -9   5   -0.50    2.80
  -2  -9   5   -0.50    2.00
  -2   9   5    1.00    3.00
   2   9  -5   -0.20    2.40
  -2   9   5    6.10    3.00
  -1  -9   5   33.30    2.10
   1  -9  -5   38.80    6.70
   1  -9  -5   47.90    5.30
  -1  -9   5   35.80    4.40
  -1  -9   5   36.30    2.90
  -1   9   5   35.50    4.80
   0  -9   5   20.00    1.70
   0  -9  -5   19.40    3.50
   0  -9  -5   23.80    4.00
   0  -9  -5   27.30    6.00
   0  -9   5   17.30    3.20
   0  -9   5   23.90    2.60
   0   9  -5   21.50    3.20
   0   9   5   24.30    4.20
  -1  -9  -5    9.90    3.40
  -1  -9  -5   11.80    4.50
   1  -9   5   11.70    2.00
   1  -9   5   11.00    2.60
  -1   9  -5   12.10    2.60
   1   9   5   11.60    3.40
  -2  -9  -5   15.00    5.00
   2  -9   5   12.90    2.90
  -2  -9  -5    7.60    2.50
   2  -9   5    9.50    2.10
  -2   9  -5   12.00    2.30
  -2   9  -5    7.50    2.00
   2   9   5   15.10    6.50
   2   9   5    7.50    3.10
  -3  -9  -5   -3.30    3.90
  -3  -9  -5   12.80    5.80
   3  -9   5    1.30    3.10
   3   9   5   -0.80    3.50
  -3   9  -5   -0.30    2.40
   3   9   5    3.70    4.70
  -3   9  -5    2.30    1.40
  -4  -9  -5    4.80    6.20
   4  -9   5    4.00    4.70
  -4  -9  -5    1.30    4.30
   4   9   5    0.00    7.40
   4   9   5    2.00    4.30
  -4   9  -5    3.90    1.10
  -4   9  -5   -1.30    3.60
  -5  -9  -5    1.20    4.70
  -5  -9  -5  -11.30    5.70
   5  -9   5   -6.10    5.80
  -5   9  -5   -5.40    4.80
   5   9   5   22.20    9.90
   5   9   5   10.30    5.20
  -6  -9  -5   -3.40    6.80
   6  -9   5    5.60    8.90
  -6  -9  -5   40.50   12.60
  -6   9  -5   16.30    7.60
   6   9   5   -9.90   13.40
  -6 -10   5   14.40    7.30
   6 -10  -5   16.10    6.80
  -6 -10   5    2.00    5.30
  -6  10   5    5.10    5.40
  -6  10   5    6.50    5.30
   6  10  -5    5.90    8.90
  -5 -10   5   -0.20    5.30
  -5 -10   5   15.50    6.40
   5 -10  -5   -2.60    4.50
  -5  10   5    3.80    5.60
  -5  10   5    2.00    3.60
   5  10  -5   -3.50    6.30
   4 -10  -5    0.10    4.40
  -4 -10   5   -3.60    3.40
  -4 -10   5   -0.40    3.40
   4  10  -5   -3.50    4.90
  -4  10   5    5.20    4.40
  -4  10   5   -3.70    3.90
  -3 -10   5    3.70    3.20
   3 -10  -5    2.20    4.10
  -3 -10   5   -0.20    2.80
  -3  10   5    6.00    4.00
   3  10  -5    5.00    3.40
  -3  10   5    1.00    3.90
  -2 -10   5    6.10    2.70
   2 -10  -5   11.10    4.10
  -2  10   5   11.70    3.50
   2  10  -5    7.70    3.10
  -2  10   5   10.00    3.30
  -1 -10   5    3.20    1.40
   1 -10  -5   14.90    5.40
   1 -10  -5    9.00    3.40
  -1 -10   5    3.50    2.00
  -1 -10   5    6.60    3.10
   1 -10  -5    3.70    2.40
  -1  10   5    3.90    2.60
   0 -10   5   57.29    3.80
   0 -10   5   60.59    5.10
   0 -10  -5   57.39    5.20
   0 -10  -5   65.79    7.00
   0 -10  -5   61.79    5.20
   0  10   5   52.99    5.30
   0  10  -5   62.29    5.10
   1 -10   5   91.69    4.50
  -1 -10  -5   72.99    8.00
  -1 -10  -5   92.59    7.00
  -1 -10  -5   93.99    7.10
   1 -10   5   82.29    5.40
  -1  10  -5   94.99    5.60
   1  10   5   93.99    7.10
   2 -10   5   34.00    4.40
   2 -10   5   37.40    3.80
  -2 -10  -5   55.19    8.80
  -2 -10  -5   42.90    5.70
  -2  10  -5   48.30    4.20
  -2  10  -5   38.90    3.70
   2  10   5   53.69    8.10
   2  10   5   43.70    5.90
  -3 -10  -5   21.40    4.40
  -3 -10  -5   24.00    7.90
   3 -10   5   20.80    4.30
   3  10   5   17.60    4.90
   3  10   5   14.10    8.20
  -3  10  -5   18.40    3.50
  -3  10  -5   19.60    2.60
   4 -10   5    9.30    4.60
  -4 -10  -5   -3.20    4.70
  -4 -10  -5    2.60    7.80
   4  10   5    5.80    4.80
  -4  10  -5    4.50    1.60
   4  10   5    7.80    6.80
  -4  10  -5    8.10    4.00
  -5 -10  -5    3.00    9.70
   5 -10   5   26.60    8.00
  -5 -10  -5    9.00    6.20
   5  10   5   16.10   10.50
   5  10   5   23.50    6.20
  -5  10  -5   34.50    6.50
  -6 -10  -5   -6.60    8.30
   6 -10   5   -4.30    8.90
  -6 -10  -5    0.50    8.10
   6  10   5  -15.50    9.30
  -6  10  -5    1.20    7.40
  -6 -11   5   16.20    7.70
   6 -11  -5   -2.30    8.70
  -6 -11   5   -6.50    8.10
  -6  11   5   -7.90    7.50
  -6  11   5    0.70    5.80
   6  11  -5  -15.30    8.70
  -5 -11   5    4.40    5.40
   5 -11  -5    0.50    6.60
  -5 -11   5    7.20    6.40
   5  11  -5  -13.50    6.60
  -5  11   5   -1.30    5.90
  -5  11   5   -7.20    3.40
   4 -11  -5   -3.70    3.40
  -4 -11   5    7.40    4.60
  -4 -11   5   -4.80    4.90
  -4  11   5   -3.40    5.00
  -4  11   5    8.20    5.20
   4  11  -5   -6.70    5.00
  -3 -11   5   10.60    4.80
   3 -11  -5   12.40    4.20
  -3 -11   5   17.00    4.00
   3  11  -5   15.70    4.90
  -3  11   5   14.90    4.90
  -3  11   5   11.00    3.70
  -2 -11   5   -2.60    3.50
   2 -11  -5    0.40    3.40
  -2 -11   5    4.70    2.70
  -2  11   5    0.50    3.50
  -2  11   5   -2.20    3.30
   1 -11  -5    0.80    3.10
  -1 -11   5   -0.30    2.00
   1 -11  -5   -1.00    2.30
   1 -11  -5   -1.00    4.10
  -1 -11   5   -1.50    1.40
  -1 -11   5    1.10    3.20
  -1  11   5    3.70    3.40
   0 -11  -5   72.69    6.60
   0 -11   5   66.69    4.60
   0 -11  -5   62.89    8.90
   0 -11   5   59.49    3.30
   0 -11  -5   64.59    6.50
   0 -11   5   78.89    6.00
   0  11  -5   65.79    5.80
   0  11   5   60.29    6.50
   1 -11   5   13.10    3.20
  -1 -11  -5   13.00    4.20
  -1 -11  -5   15.20    4.60
   1 -11   5   14.60    2.60
  -1 -11  -5   17.20    5.60
   1  11   5   11.30    4.30
  -1  11  -5    9.50    2.80
   2 -11   5    3.20    2.90
  -2 -11  -5   14.10    6.90
  -2 -11  -5   -3.20    3.90
   2 -11   5    3.50    2.20
   2  11   5    0.80    6.80
  -2  11  -5    7.00    2.60
  -2  11  -5    3.90    2.20
   2  11   5    7.40    3.30
  -3 -11  -5   13.40    7.30
  -3 -11  -5    8.70    4.80
   3 -11   5    1.70    3.40
  -3  11  -5    3.30    2.70
   3  11   5   11.00    6.60
  -3  11  -5    2.30    2.40
   3  11   5   -1.30    4.30
  -4 -11  -5   21.10    9.20
  -4 -11  -5   16.40    5.80
   4 -11   5   22.70    5.60
  -4  11  -5   17.20    2.70
  -4  11  -5   13.70    4.70
   4  11   5   19.10    9.90
   4  11   5   19.20    5.20
  -5 -11  -5    0.10    9.60
  -5 -11  -5    0.50    6.10
   5 -11   5   -0.80    7.20
   5  11   5   14.40   12.10
  -5  11  -5    8.20    6.40
   5  11   5   -1.90    6.20
   6 -12  -5   11.20    7.40
  -6 -12   5   -3.60    7.80
  -6 -12   5    1.00    8.40
  -6  12   5   -2.40    6.70
  -6  12   5   -2.10    6.60
   6  12  -5   -4.60   11.10
   5 -12  -5    3.40    5.40
  -5 -12   5   -4.50    5.70
  -5 -12   5    2.70    5.30
  -5  12   5    0.40    5.40
   5  12  -5   13.30    8.30
  -5  12   5    1.70    7.10
   4 -12  -5   -7.00    5.20
  -4 -12   5    1.70    5.10
  -4 -12   5   -0.60    5.70
  -4  12   5    3.00    4.40
  -4  12   5   -7.00    4.90
   4  12  -5    5.70    5.80
  -3 -12   5   26.80    5.10
   3 -12  -5   20.50    4.90
  -3 -12   5   14.70    5.40
  -3  12   5   25.40    6.00
  -3  12   5   24.50    5.80
   3  12  -5   26.40    5.90
  -2 -12   5   15.00    3.90
   2 -12  -5    6.20    3.90
  -2 -12   5   15.40    2.90
  -2 -12   5    9.20    4.70
  -2  12   5    7.70    3.80
   1 -12  -5    1.60    3.90
  -1 -12   5   -0.60    2.30
   1 -12  -5    0.20    3.50
  -1 -12   5   -7.70    3.30
  -1 -12   5    2.40    1.60
  -1  12   5    3.20    3.10
   1  12  -5   -8.00    3.00
   0 -12   5    6.70    3.00
   0 -12   5    7.50    3.30
   0 -12  -5    2.60    4.10
   0 -12  -5   10.80    4.40
   0 -12  -5   -1.10    4.40
   0 -12   5    8.20    2.00
   0  12   5    7.20    4.00
   0  12  -5    6.90    3.60
   1 -12   5    2.30    3.20
   1 -12   5    4.90    2.40
  -1 -12  -5    8.70    4.70
  -1 -12  -5    4.60    4.30
  -1 -12  -5  -12.00    5.90
   1 -12   5    2.90    3.10
   1  12   5   -1.40    3.80
  -1  12  -5    7.00    3.20
  -2 -12  -5   20.90    8.20
  -2 -12  -5   17.90    4.40
   2 -12   5   19.20    3.90
   2 -12   5   13.00    3.20
   2  12   5   32.50    9.30
  -2  12  -5   18.30    3.70
  -2  12  -5   21.50    3.40
   2  12   5   25.70    5.60
   3 -12   5    1.90    3.20
  -3 -12  -5   -0.80    6.90
  -3 -12  -5    3.00    3.80
  -3  12  -5    0.20    2.80
   3  12   5   12.30    8.90
   3  12   5   -0.70    5.00
  -3  12  -5   -5.30    2.60
  -4 -12  -5   16.60   10.10
  -4 -12  -5   10.40    6.20
   4 -12   5   12.90    5.60
  -4  12  -5   18.50    4.30
   4  12   5  -17.50   10.30
   4  12   5   15.30    5.60
  -4  12  -5    8.60    2.80
   5 -12   5    5.60    8.10
  -5 -12  -5  -17.50    7.40
  -5 -12  -5  -12.30   11.30
   5  12   5   -3.40    6.50
  -5  12  -5    1.40    2.10
  -5  12  -5   -6.30    6.10
   5  12   5    4.60    9.60
   5 -13  -5    0.50    7.40
  -5 -13   5   -5.30    7.60
  -5 -13   5   10.00    6.50
  -5  13   5    3.40    6.30
  -5  13   5   -3.80    5.10
   5  13  -5    5.30    8.00
   4 -13  -5   17.80    6.80
  -4 -13   5   17.90    6.00
  -4 -13   5    6.70    5.10
  -4  13   5   13.60    5.90
   4  13  -5   17.00    6.80
  -4  13   5    2.20    6.30
  -3 -13   5   -1.50    4.00
   3 -13  -5    4.10    4.40
  -3 -13   5   -3.00    3.60
  -3  13   5    5.80    4.20
  -3  13   5    2.10    5.60
   3  13  -5    5.60    5.40
   2 -13  -5   12.90    8.00
   2 -13  -5   27.50    5.50
  -2 -13   5   22.00    3.70
  -2 -13   5   21.50    4.70
  -2 -13   5   15.20    4.30
  -2  13   5   14.70    5.50
   1 -13  -5    0.80    3.50
  -1 -13   5    2.30    3.10
   1 -13  -5   -3.00    2.50
  -1 -13   5   -3.20    2.70
  -1 -13   5    1.40    2.00
   1 -13  -5   11.00    6.70
   1  13  -5   -1.80    3.50
  -1  13   5    2.10    4.60
   0 -13   5    2.50    3.50
   0 -13   5    7.80    3.40
   0 -13  -5    6.30    4.20
   0 -13  -5   17.10    7.20
   0 -13   5    4.40    2.00
   0 -13  -5    5.10    3.80
   0  13   5    0.00    4.10
   0  13  -5    6.90    3.90
  -1 -13  -5   -1.50    4.20
  -1 -13  -5    9.10    5.30
   1 -13   5    6.10    3.70
   1 -13   5   10.60    3.20
   1 -13   5    9.20    3.60
  -1 -13  -5   -4.60    6.80
  -1  13  -5    4.90    3.60
   1  13   5   10.00    5.00
  -2 -13  -5   15.20    8.70
  -2 -13  -5   -5.40    4.90
   2 -13   5    2.80    3.30
   2 -13   5    2.00    3.00
  -2  13  -5   -2.10    2.40
  -2  13  -5    2.80    3.20
   2  13   5   -5.40    3.50
  -3 -13  -5   -4.80    5.30
   3 -13   5   -2.00    4.00
  -3 -13  -5    7.50    6.40
  -3  13  -5    2.30    3.40
   3  13   5   -4.90    9.50
   3  13   5    3.20    4.20
  -3  13  -5    6.60    3.40
  -4 -13  -5   -6.90    9.60
   4 -13   5    4.90    6.20
  -4 -13  -5    5.30    5.30
  -4  13  -5   -5.30    3.10
  -4  13  -5   -1.40    4.30
   4  13   5    4.00    5.00
   4  13   5    0.40    9.10
  -5 -14   5    5.00    6.60
  -5 -14   5   -0.20    8.10
   5 -14  -5   14.50    9.50
  -5  14   5   -3.10    8.20
   5  14  -5   -1.60    8.90
  -5  14   5  -10.60    7.10
   4 -14  -5  -10.30    6.20
  -4 -14   5    0.70    7.30
  -4 -14   5    9.80    6.10
  -4  14   5   -5.50    5.70
   4  14  -5    6.20    7.20
  -4  14   5   -1.10    6.10
  -3 -14   5   16.20    6.50
   3 -14  -5    7.10    5.10
  -3 -14   5    9.40    5.30
  -3  14   5    9.90    6.20
  -3  14   5   16.10    5.40
  -2 -14   5    8.60    3.30
   2 -14  -5    4.10    7.80
   2 -14  -5   11.00    6.10
  -2 -14   5   12.40    5.50
  -2 -14   5    7.70    4.40
  -2  14   5    3.40    4.30
  -1 -14   5   12.60    2.90
  -1 -14   5   13.70    4.80
   1 -14  -5    9.50    5.40
  -1 -14   5    9.10    3.60
   1 -14  -5    4.90    3.50
   1 -14  -5   27.60    9.10
  -1  14   5   12.00    5.20
   1  14  -5   12.90    4.70
   0 -14   5   14.40    3.00
   0 -14  -5   17.00    4.90
   0 -14  -5    6.10    7.10
   0 -14   5   22.40    5.40
   0 -14  -5   16.60    4.40
   0 -14   5   15.50    4.50
   0  14  -5   19.00    4.90
   0  14   5    8.90    5.70
   1 -14   5   -3.00    3.30
  -1 -14  -5   -9.10    5.60
  -1 -14  -5   -8.90    4.90
   1 -14   5    2.00    3.20
  -1 -14  -5   -2.40    3.50
   1 -14   5   -3.50    4.10
   1  14   5    7.70    4.50
  -1  14  -5   -0.50    3.60
   2 -14   5   23.20    4.60
  -2 -14  -5   16.50    6.50
  -2 -14  -5   18.30    5.80
  -2 -14  -5   41.40   10.70
   2 -14   5   13.70    4.20
   2  14   5   24.70    6.30
  -2  14  -5   20.30    4.40
   3 -14   5    8.50    5.00
  -3 -14  -5   -8.80    4.20
  -3 -14  -5   -7.90    6.60
  -3  14  -5    1.10    3.60
   3  14   5    4.40    8.30
  -3  14  -5   -1.60    3.90
   3  14   5   -7.60    6.10
  -4 -14  -5   20.20    8.80
  -4 -14  -5   -5.70    7.40
   4 -14   5   -0.60    6.40
   4  14   5   -7.50    6.60
   4  14   5   17.10   14.10
  -4  14  -5    1.10    4.80
  -4  14  -5    1.10    4.20
  -4 -15   5   47.40    8.20
  -4 -15   5   45.60    8.40
   4 -15  -5   29.70    8.50
  -4  15   5   39.90    8.40
  -4  15   5   26.10    8.40
   4  15  -5   35.30    9.40
  -3 -15   5    5.50    5.70
   3 -15  -5    4.40    6.30
  -3 -15   5    5.90    6.40
  -3  15   5   -1.90    6.20
   2 -15  -5   15.00    6.80
  -2 -15   5   11.20    5.60
  -2 -15   5   20.40    5.50
  -2 -15   5   10.70    4.00
   2 -15  -5   20.00    9.50
  -2  15   5   21.30    6.70
  -1 -15   5   13.20    4.50
  -1 -15   5    9.20    4.70
  -1 -15   5   15.00    3.90
   1 -15  -5    6.60    4.30
   1 -15  -5   13.50    5.50
   1 -15  -5   22.60   10.10
   1  15  -5   24.70    5.40
  -1  15   5   20.40    5.30
   0 -15  -5   -6.30    3.80
   0 -15  -5    4.20    7.90
   0 -15   5    5.60    4.90
   0 -15   5   -2.70    4.00
   0 -15  -5   -3.90    5.70
   0  15   5    9.00    5.70
   0  15  -5    5.40    4.50
  -1 -15  -5   -0.10    9.10
   1 -15   5   -6.30    3.90
   1 -15   5    0.50    3.70
   1 -15   5    5.00    4.60
  -1 -15  -5    9.90    6.10
  -1 -15  -5    5.70    5.80
  -1  15  -5   -1.60    4.50
   1  15   5    1.10    4.70
  -2 -15  -5   15.30    6.90
  -2 -15  -5    2.50    5.30
   2 -15   5    9.10    4.30
   2 -15   5    2.40    5.70
  -2 -15  -5   12.50    9.50
   2 -15   5    4.00    3.80
   2  15   5   14.70    6.90
  -2  15  -5   -0.90    4.30
  -3 -15  -5    7.80    7.90
   3 -15   5   21.80    6.30
  -3 -15  -5    8.40    7.70
  -3  15  -5   17.30    5.10
   3  15   5    8.50    7.40
  -3  15  -5   14.90    4.70
  -4 -16   5    6.80    7.40
   4 -16  -5   -8.30    8.40
  -4 -16   5  -13.30    8.80
  -4  16   5   -5.00    8.50
  -4  16   5   -5.20    6.00
  -3 -16   5   -1.40    5.90
  -3 -16   5   -1.80    4.60
   3 -16  -5   13.50    8.20
   3 -16  -5   -8.20    7.70
  -3 -16   5   -3.90    7.30
  -3  16   5   -8.90    6.90
  -2 -16   5    2.70    6.10
  -2 -16   5   -1.90    4.00
   2 -16  -5   -1.00    5.20
  -2 -16   5   -3.50    5.40
   2 -16  -5  -10.50    9.70
  -2  16   5    3.80    6.00
  -1 -16   5    2.90    6.20
   1 -16  -5   -0.70    9.10
   1 -16  -5   -6.70    6.00
   1 -16  -5   -6.00    5.70
  -1 -16   5   -1.20    4.60
  -1 -16   5    1.50    3.70
  -1  16   5    6.30    5.00
   1  16  -5    7.60    5.10
   0 -16   5    1.00    5.30
   0 -16  -5   18.00    6.80
   0 -16   5    8.60    5.10
   0 -16   5   -1.00    3.50
   0 -16  -5    3.10    8.70
   0 -16  -5    5.50    6.60
   0  16  -5   11.10    5.90
   0  16   5   -2.50    6.30
  -1 -16  -5   -0.40    4.30
  -1 -16  -5   -3.30    6.40
   1 -16   5    3.10    4.10
   1 -16   5    4.40    4.80
  -1 -16  -5    2.00    9.60
   1 -16   5    3.10    5.10
  -1  16  -5  -11.90    5.10
   1  16   5    1.70    6.20
   2 -16   5    3.60    6.60
  -2 -16  -5   23.80    9.60
  -2 -16  -5   16.00    6.60
   2 -16   5   23.60    5.20
  -2 -16  -5    0.00    7.80
   2 -16   5    4.20    5.00
   2  16   5   16.20    6.40
  -2  16  -5   17.30    5.80
  -3 -16  -5   16.50    7.10
   3 -16   5   10.30    6.70
  -3 -16  -5   22.10    8.40
  -3 -16  -5    7.00   11.00
   3  16   5    7.40    7.70
  -3  16  -5   15.50    5.80
   3 -17  -5   12.70   12.00
   3 -17  -5   -5.50    8.70
  -3 -17   5   13.50    7.30
  -3 -17   5    3.40    5.40
  -3 -17   5  -10.80    6.90
  -3  17   5    7.30    5.60
   2 -17  -5    7.90    8.30
  -2 -17   5   -4.90    4.40
  -2 -17   5    8.50    6.30
  -2 -17   5   -2.20    5.10
   2 -17  -5  -12.50   11.00
  -2  17   5   -2.30    5.60
   1 -17  -5   12.30    7.60
  -1 -17   5   12.10    5.50
  -1 -17   5   22.10    5.00
  -1 -17   5   18.50    7.40
   1 -17  -5   35.80   11.90
   1 -17  -5   21.70    7.80
   1  17  -5   25.10    7.40
  -1  17   5    4.20    7.10
   0 -17  -5   11.00    7.60
   0 -17   5    7.20    6.60
   0 -17  -5   19.70    8.10
   0 -17  -5   24.70   10.90
   0 -17   5   17.70    5.90
   0 -17   5   13.70    4.60
   0  17   5   11.80    7.90
   0  17  -5    3.40    6.90
   1 -17   5    1.70    6.30
  -1 -17  -5   -4.30   11.10
   1 -17   5    3.90    4.90
   1 -17   5   -3.70    5.40
  -1 -17  -5   -0.30    7.00
  -1 -17  -5    7.20    8.10
   1  17   5   -3.60    6.90
  -1  17  -5   -7.30    6.00
  -2 -17  -5   15.40    8.20
   2 -17   5   10.10    5.90
   2 -17   5   10.80    5.40
  -2 -17  -5   12.80   12.50
   2 -17   5    3.00    7.30
  -2 -17  -5   10.30    8.60
  -2  17  -5   -3.30    5.90
   2  17   5   23.10    8.70
  -1 -18   5    0.00    5.10
   1 -18  -5   -5.70    5.90
   1 -18  -5   11.30    7.70
  -1 -18   5    5.20    6.20
   1 -18  -5    4.10   10.70
  -1 -18   5    6.20    7.60
   1  18  -5    2.70    7.70
  -1  18   5    9.30    8.40
   0 -18  -5   16.80   12.30
   0 -18   5   20.60    7.10
   0 -18  -5   14.20    7.60
   0 -18   5   22.60    5.40
   0 -18   5    3.40    6.80
   0 -18  -5    3.40    6.10
   0  18  -5   23.80    8.10
   0  18   5   -2.80    8.50
   8   0  -6   -5.70   10.20
  -8   0   6    9.30    7.80
   7   0  -6    4.40    7.40
  -7   0   6    4.60    5.90
   6   0  -6   19.40    5.00
  -6   0   6   27.50    5.90
   5   0  -6   -3.40    2.30
  -5   0   6   -3.70    2.00
   4   0  -6    2.40    3.00
  -4   0   6   -2.70    2.40
  -3   0   6    2.30    1.80
   3   0  -6    4.20    2.20
  -2   0   6  143.99    5.50
   2   0  -6  144.09    5.70
  -1   0   6    2.80    1.10
   1   0  -6    2.60    1.40
   0   0  -6   31.40    3.00
   0   0  -6   37.60    2.80
  -1   0  -6   -1.20    1.60
   1   0   6    2.40    2.00
   1   0   6   -1.40    0.80
  -2   0  -6   14.50    3.30
   2   0   6   15.20    1.60
   2   0   6   13.60    3.50
  -3   0  -6   -5.40    2.60
   3   0   6    1.80    3.60
   4   0   6   27.80    6.10
  -4   0  -6   27.50    5.30
  -4   0  -6   22.60    2.20
  -5   0  -6    0.50    1.80
  -5   0  -6    4.10    4.80
   5   0   6   10.10    6.10
   6   0   6   64.99   11.50
  -6   0  -6   65.89    5.00
  -6   0  -6   76.69   11.10
   8  -1  -6    9.20   10.60
  -8  -1   6   -1.70    7.90
   8   1  -6   -6.40   11.50
  -8   1   6   17.50    7.90
   7  -1  -6   14.10    8.10
  -7  -1   6   10.60    6.00
  -7   1   6   17.10    6.50
   7   1  -6   13.00    8.30
   6  -1  -6   29.60    6.70
  -6  -1   6   28.40    5.20
  -6   1   6   27.40    5.80
   6   1  -6   22.60    6.10
  -5  -1   6    6.80    3.40
   5  -1  -6   -5.20    3.40
   5   1  -6    1.90    3.80
  -5   1   6    3.20    3.50
  -4  -1   6    2.20    2.20
   4  -1  -6    1.00    2.10
  -4   1   6   -0.30    2.70
   4   1  -6   -2.40    2.70
  -3  -1   6    4.30    2.00
   3  -1  -6    2.50    2.50
  -3   1   6    6.00    2.30
   3   1  -6    5.10    2.50
   2  -1  -6    4.30    1.70
  -2  -1   6    3.20    1.50
   2   1  -6    7.90    1.90
  -2   1   6    5.10    1.90
   1  -1  -6  457.35   11.70
  -1  -1   6  452.05   10.90
  -1   1   6  452.15   11.70
   1   1  -6  448.26   10.90
   0  -1  -6   29.40    2.70
   0  -1  -6   29.00    3.30
   0   1  -6   29.60    2.30
   0   1  -6   31.50    2.90
   1  -1   6   19.50    1.60
   1  -1   6   21.50    3.20
  -1  -1  -6   21.30    3.40
  -1   1  -6   19.70    3.00
   1   1   6   17.20    2.20
   1   1   6   25.50    3.80
   2  -1   6   87.49    6.10
   2  -1   6   81.89    2.60
  -2  -1  -6   89.39    6.20
   2   1   6   86.69    3.70
  -2   1  -6   91.49    5.60
   2   1   6   66.29    6.10
  -3  -1  -6    1.80    3.40
  -3  -1  -6    7.30    1.50
   3  -1   6    4.10    3.30
   3   1   6    3.90    1.30
  -3   1  -6    2.80    2.90
   3   1   6    2.90    3.10
  -4  -1  -6   -5.30    2.70
  -4  -1  -6    1.10    1.70
   4  -1   6   -7.80    3.80
   4   1   6    7.20    4.10
  -4   1  -6    3.10    3.70
  -5  -1  -6   -7.00    5.60
  -5  -1  -6    0.90    2.30
   5  -1   6    1.60    6.20
   5   1   6    8.80    5.90
  -5   1  -6   -0.60    4.20
  -5   1  -6    2.30    1.00
   6  -1   6    6.20    9.20
  -6  -1  -6   17.90    3.80
  -6  -1  -6   19.00    8.50
   6   1   6   -1.50    6.20
  -6   1  -6   19.60    8.30
  -6   1  -6   12.40    1.80
  -7  -2   6    2.70    4.90
   7   2  -6    2.20    5.80
  -7   2   6    2.10    6.30
  -6  -2   6   -9.20    4.30
   6  -2  -6   -1.30    3.80
  -6   2   6   -2.60    3.70
   6   2  -6    1.90    5.20
  -5  -2   6    5.10    3.60
   5  -2  -6   10.60    4.80
   5   2  -6    1.10    4.00
  -5   2   6    3.50    3.30
   4  -2  -6    3.70    2.40
  -4  -2   6    8.70    2.70
  -4   2   6    4.30    2.80
   4   2  -6    6.60    3.10
  -3  -2   6   38.80    3.40
   3  -2  -6   36.50    4.20
  -3   2   6   41.00    3.70
   3   2  -6   37.40    4.10
  -2  -2   6   38.00    2.70
   2  -2  -6   39.90    3.30
   2   2  -6   42.10    3.20
  -2   2   6   42.80    3.70
   1  -2  -6   67.99    3.90
  -1  -2   6   74.29    3.00
   1   2  -6   71.19    3.00
  -1   2   6   75.69    4.10
   0  -2  -6  104.39    4.80
   0  -2  -6   97.29    5.70
   0   2  -6  109.09    3.70
   0   2   6  102.89    4.50
  -1  -2  -6    7.70    3.10
   1  -2   6    8.90    2.40
  -1   2  -6   10.10    2.20
   1   2   6    8.90    1.70
   1   2   6   10.80    3.30
  -2  -2  -6   -1.50    2.40
  -2  -2  -6   -1.10    1.30
   2  -2   6    4.80    2.40
  -2   2  -6   -0.70    1.90
   2   2   6    1.90    3.40
   2   2   6    3.00    1.50
  -3  -2  -6   25.60    5.20
   3  -2   6   32.40    5.20
  -3  -2  -6   26.40    2.90
   3   2   6   28.90    2.80
  -3   2  -6   24.10    4.20
   3   2   6   31.90    5.80
  -4  -2  -6    8.00    2.30
  -4  -2  -6    6.40    5.00
   4  -2   6    4.80    4.80
   4   2   6    5.80    5.60
  -4   2  -6    4.50    4.00
  -5  -2  -6   12.30    6.20
  -5  -2  -6    7.20    3.10
   5  -2   6    7.60    6.20
  -5   2  -6   14.00    5.80
   5   2   6    1.10    7.40
   6  -2   6    3.20    7.90
  -6  -2  -6   19.30    6.50
  -6  -2  -6   21.20    4.50
   6   2   6   24.90    9.60
  -6   2  -6   19.20    7.70
  -7  -3   6   -5.00    5.40
   7  -3  -6   10.00    8.20
   7   3  -6    3.00    8.40
  -7   3   6    0.30    4.90
  -6  -3   6    1.80    4.80
   6  -3  -6   -2.30    6.20
   6   3  -6   -2.60    5.40
  -6   3   6  -10.30    4.80
  -5  -3   6    7.00    3.60
   5  -3  -6    3.20    4.60
   5   3  -6    6.40    4.10
  -5   3   6    6.40    4.10
   4  -3  -6   -1.50    2.80
  -4  -3   6   -3.90    2.10
  -4   3   6    4.40    2.50
   4   3  -6    2.10    2.90
  -3  -3   6   -0.80    1.50
   3  -3  -6    0.20    2.40
   3   3  -6    1.40    2.10
  -3   3   6   -1.00    2.10
   2  -3  -6   14.20    2.90
  -2  -3   6   14.00    2.00
  -2   3   6   10.60    2.70
   2   3  -6   13.40    2.20
  -1  -3   6   17.40    1.40
   1  -3  -6   17.70    2.50
  -1   3   6   19.00    2.80
   1   3  -6   18.20    1.60
   0  -3  -6  368.76   12.60
   0  -3  -6  393.76   11.20
   0   3  -6  379.36    9.00
   0   3  -6  391.36    8.50
   0   3   6  388.66   10.80
  -1  -3  -6    4.50    2.60
   1  -3   6    1.20    1.50
   1   3   6   -2.40    2.70
   1   3   6    0.10    1.30
  -1   3  -6    0.70    1.40
  -2  -3  -6   14.00    2.20
   2  -3   6   12.10    2.90
  -2  -3  -6   12.50    3.70
   2   3   6   14.60    4.00
  -2   3  -6    7.50    2.10
   2   3   6   10.00    2.20
   3  -3   6    3.60    3.00
  -3  -3  -6    3.70    3.20
  -3  -3  -6    4.20    2.10
  -3   3  -6    9.70    3.30
   3   3   6    3.40    1.80
   3   3   6   11.80    5.20
  -4  -3  -6   -1.60    2.30
  -4  -3  -6    2.30    5.20
   4  -3   6    1.50    4.10
  -4   3  -6   -0.30    3.30
   4   3   6   -2.50    2.00
   4   3   6    0.60    4.10
   5  -3   6   -7.70    4.90
  -5  -3  -6   -1.70    3.20
  -5  -3  -6   -1.50    6.30
   5   3   6   18.60    6.40
  -5   3  -6   -3.10    4.40
   6  -3   6   10.80    8.00
  -6  -3  -6   12.90    4.70
  -6  -3  -6    7.50    8.90
   6   3   6   -1.80   10.40
  -6   3  -6   14.80    7.10
  -7  -4   6   14.80    7.40
  -7  -4   6    0.50    6.00
   7  -4  -6   18.80    7.90
   7   4  -6   -5.70    8.40
  -7   4   6    4.60    7.10
  -6  -4   6   -2.60    4.10
   6  -4  -6   -3.10    6.00
  -6   4   6   -2.90    3.80
   6   4  -6    3.90    5.70
  -5  -4   6    2.60    3.50
   5  -4  -6    0.80    4.40
  -5   4   6   -3.10    3.90
   5   4  -6    9.30    5.00
   4  -4  -6   -3.00    3.20
  -4  -4   6    5.10    2.90
   4   4  -6    2.80    2.90
  -4   4   6    2.70    3.20
   3  -4  -6    2.10    1.80
  -3  -4   6    0.70    1.80
  -3   4   6   -2.30    2.20
   3   4  -6   -0.80    2.30
   2  -4  -6   26.00    3.30
  -2  -4   6   22.50    2.20
   2   4  -6   21.00    2.60
  -2   4   6   27.80    3.20
   1  -4  -6   52.19    4.20
  -1   4   6   53.69    4.00
  -1   4   6   53.99    4.00
   1   4  -6   48.20    1.90
   1   4  -6   52.89    1.90
   0  -4  -6  413.86   13.70
   0  -4  -6  408.16   12.10
   0   4   6  415.46   11.70
  -1  -4  -6   20.10    4.10
  -1  -4  -6   18.90    2.60
   1  -4   6   22.10    1.80
   1  -4   6   22.10    2.70
   1   4   6   28.30    4.90
   1   4   6   22.50    2.80
  -2  -4  -6    1.70    3.20
   2  -4   6   -2.80    1.90
  -2  -4  -6    0.70    1.70
  -2   4  -6    0.30    1.70
   2   4   6    0.90    1.80
   2   4   6   -0.60    3.40
   3  -4   6    2.50    3.20
  -3  -4  -6    4.10    2.50
  -3  -4  -6    5.10    4.50
  -3   4  -6    4.10    2.60
   3   4   6    8.20    4.50
   3   4   6    6.60    2.20
  -4  -4  -6    4.70    3.00
   4  -4   6   -5.10    4.10
  -4  -4  -6   10.20    5.50
   4   4   6    4.00    2.70
  -4   4  -6   -1.70    3.70
   4   4   6    1.80    5.70
  -5  -4  -6   21.60    4.40
  -5  -4  -6   24.80    8.20
   5  -4   6   30.40    7.60
  -5   4  -6   24.60    6.10
   5   4   6   19.50    8.20
  -6  -4  -6    3.10    9.50
   6  -4   6   -9.20    7.40
  -6  -4  -6   -2.10    4.80
   6   4   6   24.60   11.50
  -6   4  -6   -4.70    6.80
   7  -5  -6  -21.50    7.90
  -7  -5   6   -5.90    5.30
  -7  -5   6  -11.30    6.30
  -7   5   6    0.60    7.40
   7   5  -6   -7.10    8.50
  -6  -5   6   14.90    5.90
  -6  -5   6    8.30    6.20
   6  -5  -6    8.10    5.40
   6   5  -6   24.60    7.10
  -6   5   6   21.60    6.60
   5  -5  -6    4.20    3.90
  -5  -5   6   12.60    4.40
  -5  -5   6   -3.00    3.70
  -5   5   6   16.90    5.00
   5   5  -6    6.50    4.80
  -4  -5   6   -1.20    2.60
   4  -5  -6    5.20    3.70
   4   5  -6   -6.70    2.80
  -4   5   6    3.40    2.90
   3  -5  -6    4.00    2.40
  -3  -5   6   -0.20    1.60
  -3   5   6   -0.70    1.70
   3   5  -6   -0.30    2.20
  -2  -5   6    4.20    1.30
   2  -5  -6    7.30    2.30
  -2   5   6    8.30    2.70
   2   5  -6    4.10    1.70
   1  -5  -6  127.29    6.10
  -1  -5   6  127.39    5.80
  -1   5   6  129.49    6.00
   0  -5   6    8.90    1.80
   0  -5  -6   11.70    3.30
   0  -5  -6    8.10    2.20
   0   5   6   12.30    2.40
  -1  -5  -6    2.40    3.30
  -1  -5  -6    1.40    2.00
   1  -5   6    0.00    1.00
   1  -5   6    1.90    1.30
   1   5   6    3.30    2.00
   1   5   6    7.50    4.10
  -1   5  -6   -0.60    1.00
  -2  -5  -6    6.30    2.50
  -2  -5  -6    7.90    4.10
   2  -5   6    7.90    2.60
  -2   5  -6    5.60    2.00
   2   5   6    4.40    2.20
   2   5   6    6.10    4.10
   3  -5   6    7.00    3.70
  -3  -5  -6   14.20    5.20
  -3  -5  -6    8.00    2.90
  -3   5  -6    2.20    2.70
   3   5   6    6.70    5.90
   3   5   6    2.30    2.40
  -4  -5  -6   17.60    5.60
  -4  -5  -6   17.60    4.00
   4  -5   6   11.90    5.20
   4   5   6   17.50    3.50
   4   5   6   11.30    5.70
  -4   5  -6   16.40    4.50
  -5  -5  -6    3.20    3.60
  -5  -5  -6    1.40    5.10
   5  -5   6    6.60    6.30
  -5   5  -6   -5.30    5.20
   5   5   6   -1.00    7.10
   6  -5   6    5.30    9.00
  -6  -5  -6   10.60    9.70
  -6  -5  -6    1.30    5.10
   6   5   6   -0.50    8.20
  -6   5  -6   -5.90    7.00
   7  -6  -6   13.80   10.10
  -7  -6   6   -4.80    6.60
  -7  -6   6   16.50    8.10
  -7   6   6   -1.60    5.20
   7   6  -6   -2.60    8.80
  -6  -6   6    6.70    5.50
   6  -6  -6    1.30    4.80
  -6  -6   6   -5.60    5.00
  -6   6   6    4.00    6.00
   6   6  -6   -3.20    6.40
  -5  -6   6   48.60    7.00
   5  -6  -6   31.80    5.90
  -5  -6   6   42.10    6.20
   5   6  -6   37.90    7.10
  -5   6   6   30.10    6.20
  -4  -6   6   -3.10    3.70
  -4  -6   6    6.50    3.00
   4  -6  -6   -0.80    3.70
  -4   6   6    2.30    3.10
   4   6  -6    2.60    3.50
  -3  -6   6    5.80    3.20
   3  -6  -6    3.50    3.00
  -3  -6   6    3.90    2.10
   3   6  -6    2.70    2.70
  -3   6   6    1.20    3.00
  -2  -6   6   -1.60    1.10
  -2  -6   6   -1.40    2.40
   2  -6  -6   -0.10    2.40
  -2   6   6   -0.60    2.40
   2   6  -6    0.00    1.40
  -2   6   6   -0.30    1.60
   1  -6  -6   28.10    3.50
   1  -6  -6   16.50    4.60
  -1  -6   6   16.30    3.00
  -1   6   6   21.10    3.40
   0  -6  -6    0.50    2.50
   0  -6   6   -0.10    1.40
   0  -6  -6    2.70    2.50
   0   6   6    2.40    1.80
  -1  -6  -6  314.97   10.40
   1  -6   6  306.37    8.20
  -1  -6  -6  303.97   12.80
   1  -6   6  297.27    8.10
   1   6   6  313.37   13.40
  -1   6  -6  302.27    7.40
   1   6   6  305.07   10.50
  -2  -6  -6   10.30    3.00
  -2  -6  -6   14.20    5.10
   2  -6   6   14.20    3.00
  -2   6  -6    9.50    2.20
   2   6   6   12.80    3.00
   2   6   6   19.30    5.90
   3  -6   6    1.60    3.30
  -3  -6  -6   -4.00    4.40
  -3  -6  -6   -3.60    2.50
   3   6   6    5.30    4.10
  -3   6  -6    0.40    2.50
   3   6   6    1.80    2.60
  -4  -6  -6   73.19    7.00
   4  -6   6   73.59    8.20
  -4  -6  -6   88.99    9.10
  -4   6  -6   75.79    6.80
   4   6   6   71.49   10.90
   4   6   6   78.69    6.10
  -5  -6  -6   12.70    4.50
  -5  -6  -6   13.20    6.70
   5  -6   6   11.30    6.50
   5   6   6    8.40    7.30
  -5   6  -6    9.50    5.40
  -6  -6  -6   -7.20    9.40
   6  -6   6   12.60    9.50
  -6  -6  -6   -0.10    5.80
   6   6   6    4.50    9.30
  -6   6  -6   -4.60    6.80
  -7  -7   6   -0.20    5.90
  -7  -7   6   13.50    7.30
   7  -7  -6   14.90   10.50
   7   7  -6    3.60    9.20
  -7   7   6    5.70    7.30
  -6  -7   6    0.70    4.70
  -6  -7   6    3.90    5.30
   6  -7  -6    0.00    4.90
   6   7  -6    9.80    6.50
  -6   7   6   11.00    4.80
  -5  -7   6   24.30    5.20
  -5  -7   6   18.20    5.60
   5  -7  -6   27.00    6.00
   5   7  -6   14.40    4.70
  -5   7   6   25.20    6.10
   4  -7  -6   -4.10    3.50
  -4  -7   6   -3.70    2.60
  -4  -7   6    3.60    3.10
   4   7  -6    3.50    3.60
  -4   7   6   -2.80    3.50
   3  -7  -6    3.50    2.60
  -3  -7   6    5.40    2.40
  -3  -7   6    0.50    2.10
  -3   7   6    3.30    2.60
  -3   7   6    6.20    2.90
   3   7  -6    5.10    2.80
   2  -7  -6    5.90    3.10
  -2  -7   6    9.30    1.60
  -2  -7   6    7.80    2.80
  -2   7   6    8.90    2.60
   2   7  -6    3.80    2.00
  -2   7   6    6.40    2.90
   1  -7  -6    1.00    2.80
  -1  -7   6    3.50    2.10
   1  -7  -6   -1.40    1.90
  -1   7   6    1.50    2.40
   0  -7  -6   17.00    4.10
   0  -7  -6   15.90    3.30
   0  -7  -6   15.80    3.30
   0  -7   6   13.40    2.60
   0   7   6   13.90    3.10
   1  -7   6    0.20    1.10
  -1  -7  -6    3.90    4.40
   1  -7   6    1.90    1.50
  -1  -7  -6    2.50    2.60
  -1   7  -6    0.20    0.90
   1   7   6    2.30    2.40
   1   7   6    3.80    3.70
   2  -7   6    2.80    2.40
   2  -7   6   -0.20    0.80
  -2  -7  -6    1.90    2.80
  -2  -7  -6    2.50    3.30
   2   7   6   -1.60    3.90
  -2   7  -6   -1.00    1.50
   2   7   6    3.10    2.00
  -3  -7  -6   -0.70    2.70
   3  -7   6    0.50    3.00
  -3  -7  -6   -7.20    4.70
  -3   7  -6    0.80    2.40
   3   7   6   -0.80    2.90
   3   7   6   -2.80    5.60
  -4  -7  -6   32.60    5.30
   4  -7   6   25.10    6.10
  -4  -7  -6   26.70    7.10
  -4   7  -6   32.20    5.00
   4   7   6   32.80    7.70
   4   7   6   26.90    4.90
  -5  -7  -6   -3.90    6.30
  -5  -7  -6   -4.50    4.70
   5  -7   6    2.90    6.00
   5   7   6   -1.80    3.70
   5   7   6    6.80    9.90
  -5   7  -6    2.90    4.80
   6  -7   6   -5.60    8.30
  -6  -7  -6    7.10    6.20
  -6  -7  -6    5.80   11.10
  -6   7  -6   16.00    7.10
  -7  -8   6   -5.50    9.30
   7  -8  -6   16.80    8.10
  -7  -8   6   -1.10    7.00
   7   8  -6    7.10   10.00
  -7   8   6   -3.30    8.60
   6  -8  -6   -1.60    6.90
  -6  -8   6   -5.70    6.50
  -6  -8   6    5.70    5.70
   6   8  -6   -7.00    6.50
  -6   8   6    9.40    6.70
   5  -8  -6   43.20    7.80
  -5  -8   6   25.40    5.80
  -5  -8   6   31.60    5.90
  -5   8   6   30.70    6.30
   5   8  -6   29.50    6.60
  -5   8   6   29.20    5.80
   4  -8  -6   -2.80    4.00
  -4  -8   6   -3.20    2.50
  -4  -8   6    3.10    3.30
  -4   8   6    2.90    3.60
   4   8  -6    0.40    3.90
   3  -8  -6   33.50    5.60
  -3  -8   6   28.90    3.90
  -3  -8   6   35.90    5.40
  -3   8   6   36.40    4.60
  -3   8   6   31.30    5.40
   3   8  -6   28.80    4.40
   2  -8  -6    2.90    3.20
  -2  -8   6    2.60    1.60
  -2  -8   6    0.80    2.60
   2   8  -6    3.50    2.00
  -2   8   6    3.50    2.50
  -2   8   6    0.80    2.00
   1  -8  -6   14.10    3.30
   1  -8  -6   11.70    4.60
  -1  -8   6   11.50    3.00
  -1   8   6   11.90    3.40
   0  -8  -6   61.19    4.70
   0  -8  -6   57.19    5.70
   0  -8   6   62.29    4.50
   0  -8  -6   57.39    6.20
   0   8   6   66.99    5.70
  -1  -8  -6  232.58   12.60
   1  -8   6  230.98    7.60
   1  -8   6  230.88    6.70
  -1  -8  -6  223.08    9.10
   1   8   6  231.38    9.60
   1   8   6  240.18   12.30
  -1   8  -6  231.68    5.90
   2  -8   6   -0.10    1.30
  -2  -8  -6    3.70    5.30
  -2  -8  -6    1.60    3.20
   2  -8   6    0.00    2.30
   2   8   6    4.10    3.10
   2   8   6    0.90    5.20
  -2   8  -6    3.50    2.00
   3  -8   6    4.20    3.60
  -3  -8  -6    5.00    6.00
  -3  -8  -6    1.30    3.00
   3   8   6   -0.10    3.30
  -3   8  -6    1.60    2.50
   3   8   6    2.70    6.20
   4  -8   6   55.19    7.70
  -4  -8  -6   46.20    6.30
  -4  -8  -6   55.79   10.30
   4   8   6   63.79   10.80
  -4   8  -6   51.09    5.50
   4   8   6   55.19    6.70
  -5  -8  -6    2.40    5.50
  -5  -8  -6   12.50    9.10
   5  -8   6   12.90    7.10
   5   8   6    6.90    5.10
  -5   8  -6    9.70    5.00
   5   8   6   13.10   10.40
  -6  -8  -6    6.30    6.80
  -6  -8  -6    3.10    9.00
   6  -8   6    5.60    8.90
   6   8   6  -13.70   14.10
  -6   8  -6   12.00    7.30
   7  -9  -6   -9.10    9.50
  -7  -9   6   13.60    8.40
  -7  -9   6    6.20    6.60
   7   9  -6   11.70   11.10
  -7   9   6   10.50    7.40
  -7   9   6   -6.00    8.30
  -6  -9   6   20.20    7.30
   6  -9  -6   15.20    8.70
  -6  -9   6   16.20    7.10
  -6   9   6   29.30    6.60
  -6   9   6   16.90    5.40
   6   9  -6    7.50    7.60
  -5  -9   6    6.70    4.00
   5  -9  -6   10.20    6.20
  -5  -9   6   -1.30    4.30
  -5   9   6    2.60    5.00
  -5   9   6   16.30    6.30
   5   9  -6    3.60    5.20
  -4  -9   6   12.20    4.20
  -4  -9   6   18.20    4.30
   4  -9  -6   10.40    4.10
  -4   9   6    7.40    3.60
  -4   9   6   11.10    4.30
   4   9  -6    0.40    4.40
   3  -9  -6   74.39    6.50
  -3  -9   6   95.99    7.60
  -3  -9   6   78.79    5.50
  -3   9   6   82.89    6.10
  -3   9   6   88.09    7.40
   3   9  -6   77.19    6.50
   2  -9  -6    9.70    3.60
  -2  -9   6    6.10    1.90
  -2  -9   6    6.40    3.40
   2   9  -6    5.90    2.40
  -2   9   6   10.30    3.30
  -2   9   6   12.50    3.30
  -1  -9   6    0.60    2.30
   1  -9  -6    0.00    4.60
   1  -9  -6   -1.00    3.00
  -1  -9   6    1.30    0.50
  -1  -9   6    1.00    0.70
  -1   9   6   -6.40    2.80
   0  -9  -6   36.20    5.20
   0  -9   6   36.30    4.20
   0  -9  -6   36.50    7.00
   0  -9  -6   29.10    4.30
   0   9   6   23.60    4.00
  -1  -9  -6    2.50    2.70
  -1  -9  -6    9.40    2.90
   1  -9   6    8.20    1.60
  -1  -9  -6    9.50    5.40
   1  -9   6   11.10    2.40
   1   9   6   15.90    3.80
  -2  -9  -6   37.20    5.40
   2  -9   6   36.00    3.10
  -2  -9  -6   44.40    7.40
   2  -9   6   43.20    4.60
   2   9   6   44.70    5.20
   2   9   6   25.10    8.10
   3  -9   6   -7.30    3.10
  -3  -9  -6   11.90    5.20
  -3  -9  -6   -0.90    3.40
   3   9   6   -8.90    4.80
  -3   9  -6   -0.70    2.50
   3   9   6    1.30    3.70
   4  -9   6   13.10    5.50
  -4  -9  -6   14.80    9.00
  -4  -9  -6   18.50    5.50
   4   9   6   18.00    8.70
  -4   9  -6   25.60    4.60
   4   9   6   12.70    5.10
  -5  -9  -6   13.80    5.80
   5  -9   6    9.00    7.30
  -5  -9  -6   14.00   10.00
   5   9   6    3.80    5.20
   5   9   6    5.80    8.40
  -5   9  -6   15.50    5.60
   6 -10  -6    9.80    6.70
  -6 -10   6   -9.80    6.30
  -6 -10   6   -1.40    7.20
  -6  10   6    4.80    6.80
  -6  10   6   -7.40    6.80
  -5 -10   6    7.00    5.60
   5 -10  -6    6.60    4.90
  -5 -10   6   11.40    6.00
   5  10  -6   -0.10    6.10
  -5  10   6    3.40    4.80
  -5  10   6    6.90    5.30
  -4 -10   6   33.10    5.50
  -4 -10   6   34.20    6.40
   4 -10  -6   40.50    6.70
  -4  10   6   47.60    7.40
  -4  10   6   24.60    5.00
   4  10  -6   42.50    6.80
  -3 -10   6   20.20    3.90
  -3 -10   6   28.70    5.40
   3 -10  -6   40.00    6.20
  -3  10   6   28.40    5.10
   3  10  -6   26.10    4.70
  -3  10   6   27.30    4.90
   2 -10  -6   25.40    5.00
  -2 -10   6   25.50    3.10
  -2 -10   6   22.40    4.60
  -2  10   6   27.80    5.20
  -2  10   6   29.60    5.10
  -1 -10   6    0.80    1.00
  -1 -10   6    0.90    0.80
  -1 -10   6    0.40    2.60
   1 -10  -6    2.80    4.90
   1 -10  -6    0.30    3.30
  -1  10   6   -0.50    2.30
   0 -10   6   26.70    1.90
   0 -10  -6   36.10    7.20
   0 -10   6   30.10    1.70
   0 -10   6   36.90    4.50
   0 -10  -6   39.00    4.70
   0 -10  -6   40.10    4.50
   0  10   6   24.90    4.30
  -1 -10  -6   12.60    6.20
  -1 -10  -6    8.40    3.60
  -1 -10  -6    7.50    3.40
   1 -10   6    2.00    1.50
   1 -10   6    5.20    2.50
   1  10   6   13.10    3.80
   2 -10   6   13.30    2.50
  -2 -10  -6   14.60    4.80
   2 -10   6   14.30    3.30
  -2 -10  -6   20.10    7.10
   2  10   6   17.10    4.90
   2  10   6    8.00    7.00
   3 -10   6    3.60    3.90
  -3 -10  -6   18.80    7.60
  -3 -10  -6   -4.10    4.20
   3  10   6    1.90    7.90
   3  10   6    1.40    4.50
  -3  10  -6    1.90    2.70
  -4 -10  -6   -4.90    6.00
   4 -10   6   -4.00    5.00
  -4 -10  -6   -4.60    4.20
  -4  10  -6   -3.80    3.50
   4  10   6   -3.80    4.80
   4  10   6    1.10    6.50
  -5 -10  -6   40.40   10.20
   5 -10   6   56.39    9.70
  -5 -10  -6   48.60    7.90
   5  10   6   38.60    7.30
   5  10   6   39.50   12.40
  -5  10  -6   44.50    7.20
  -6 -11   6   22.50    8.90
   6 -11  -6   12.40    9.60
  -6 -11   6   15.60    7.90
  -6  11   6   19.30    7.30
   6  11  -6   16.60    9.60
  -6  11   6   25.50    9.20
  -5 -11   6    4.10    6.10
  -5 -11   6    2.80    5.50
   5 -11  -6    3.00    6.90
  -5  11   6    8.90    5.70
   5  11  -6    3.40    6.90
  -5  11   6   -0.90    6.50
  -4 -11   6   -5.50    4.00
   4 -11  -6   -2.30    3.60
  -4 -11   6   -1.80    5.10
  -4  11   6    4.80    4.20
   4  11  -6    5.50    4.90
  -4  11   6   -3.80    4.70
  -3 -11   6   20.00    3.90
  -3 -11   6   15.90    5.20
   3 -11  -6   25.20    6.20
  -3  11   6   24.70    5.00
  -3  11   6   25.20    5.50
   3  11  -6   23.30    4.80
  -2 -11   6   11.90    4.30
   2 -11  -6   12.90    4.70
  -2 -11   6   17.50    2.80
  -2  11   6   10.50    4.70
  -1 -11   6    7.40    1.80
  -1 -11   6    5.50    1.30
  -1 -11   6    0.70    3.20
   1 -11  -6    3.90    4.50
   1 -11  -6    2.30    2.70
  -1  11   6    4.60    4.20
   0 -11   6   23.20    4.10
   0 -11   6   26.60    2.10
   0 -11  -6   23.10    4.80
   0 -11  -6   21.40    5.00
   0 -11   6   24.60    2.60
   0 -11  -6   20.60    5.80
   0  11   6   19.90    4.80
  -1 -11  -6    7.50    7.00
  -1 -11  -6    8.90    4.20
   1 -11   6    8.90    2.00
  -1 -11  -6   14.70    4.20
   1 -11   6   11.50    2.70
   1 -11   6    9.90    3.10
   1  11   6    8.10    4.30
   2 -11   6   30.70    4.20
  -2 -11  -6   32.70    8.80
   2 -11   6   21.60    3.20
  -2 -11  -6   22.60    5.60
   2  11   6   26.50    6.60
   2  11   6   24.10    4.70
  -3 -11  -6   10.50    4.90
  -3 -11  -6   34.90    9.20
   3 -11   6   16.50    4.40
  -3  11  -6   15.80    3.40
   3  11   6   19.80    9.40
   3  11   6   17.20    5.40
  -4 -11  -6    4.70    8.90
  -4 -11  -6   -4.80    4.80
   4 -11   6   -3.50    5.30
  -4  11  -6   -1.50    3.80
   4  11   6    4.40    5.50
   4  11   6   -5.20   10.40
  -5 -11  -6    1.60   11.00
  -5 -11  -6    2.80    6.80
   5 -11   6   -1.10    8.00
  -5  11  -6    0.70    6.00
   5  11   6  -14.90    5.70
   5  11   6   21.50   12.70
   6 -12  -6    0.10    7.90
  -6 -12   6   -0.70    8.70
  -6 -12   6   -6.50    7.50
   6  12  -6   -5.30   10.50
  -6  12   6   -5.60    7.80
  -6  12   6   -8.60    6.60
   5 -12  -6    0.00    7.30
  -5 -12   6    1.10    6.90
  -5 -12   6   -0.20    5.60
  -5  12   6   -3.90    6.20
  -5  12   6   10.10    7.50
   5  12  -6    1.90    7.90
  -4 -12   6   14.00    6.60
  -4 -12   6    4.20    4.50
   4 -12  -6   11.60    4.60
  -4  12   6    3.20    5.60
   4  12  -6   15.50    5.70
  -4  12   6   13.00    5.80
   3 -12  -6   22.50    6.20
  -3 -12   6   27.70    4.40
  -3 -12   6   17.90    5.70
  -3  12   6   22.30    6.00
  -3  12   6   24.00    6.30
   3  12  -6   30.90    5.70
   2 -12  -6    6.00    4.50
   2 -12  -6   -4.40    5.90
  -2 -12   6    1.30    2.00
  -2 -12   6    1.10    2.50
  -2 -12   6   -2.40    3.90
  -2  12   6   -3.90    3.20
  -1 -12   6    4.10    2.20
  -1 -12   6   -0.10    3.70
  -1 -12   6    4.10    1.50
   1 -12  -6   -7.30    6.30
   1 -12  -6    6.30    4.50
  -1  12   6    1.20    3.20
   0 -12  -6   21.10    5.00
   0 -12  -6   15.40    5.30
   0 -12   6   21.10    4.40
   0 -12   6   27.10    3.10
   0 -12  -6   19.80    7.30
   0 -12   6   24.80    2.40
   0  12   6   20.40    5.20
  -1 -12  -6    2.60    4.10
   1 -12   6    7.90    2.10
  -1 -12  -6    8.50    3.80
   1 -12   6    6.90    3.20
  -1 -12  -6   -3.00    7.00
   1 -12   6    5.20    3.10
   1  12   6    2.40    4.40
  -2 -12  -6   -2.70    3.70
   2 -12   6   -4.40    2.70
   2 -12   6   -0.70    3.00
  -2 -12  -6   -0.50    7.30
   2  12   6   -3.30    5.70
   2  12   6    0.00    4.90
   3 -12   6    9.70    4.00
  -3 -12  -6    4.00    6.10
  -3 -12  -6    2.60    4.20
   3  12   6   11.50    4.50
   3  12   6    7.40    7.80
  -3  12  -6   -3.00    2.90
  -4 -12  -6   19.60   10.70
   4 -12   6    0.00    5.80
  -4 -12  -6    1.70    5.80
  -4  12  -6    4.70    4.00
   4  12   6  -11.20   12.20
   4  12   6    4.00    6.20
   5 -12   6    0.90    8.40
  -5 -12  -6   25.80    8.20
  -5 -12  -6    7.00   11.70
  -5  12  -6  -13.90    6.00
   5  12   6   22.50   15.60
   5  12   6   -6.40    7.20
  -5 -13   6    4.20    6.70
  -5 -13   6    4.40    8.00
   5 -13  -6   -5.50    6.40
  -5  13   6   -2.40    5.70
   5  13  -6    0.50    7.20
  -5  13   6    9.90    6.60
  -4 -13   6   -1.60    4.70
  -4 -13   6   -2.60    4.50
   4 -13  -6    5.50    6.30
  -4  13   6    7.00    6.10
  -4  13   6    7.30    7.20
   4  13  -6   12.20    6.80
  -3 -13   6   -2.90    3.40
   3 -13  -6    4.50    5.80
  -3 -13   6   -0.10    3.90
  -3  13   6   -6.80    4.90
  -2 -13   6   32.20    5.70
   2 -13  -6   33.80    9.10
  -2 -13   6   28.80    3.60
  -2 -13   6   34.10    4.40
   2 -13  -6   35.00    7.20
  -2  13   6   24.80    6.20
  -1 -13   6   46.30    4.30
  -1 -13   6   33.40    5.80
   1 -13  -6   33.80    6.60
   1 -13  -6   39.70    9.80
  -1  13   6   34.80    6.90
   0 -13  -6   14.10    4.80
   0 -13  -6    2.20    5.30
   0 -13   6    8.40    2.60
   0 -13   6   13.10    2.10
   0 -13   6    3.00    3.60
   0 -13  -6   15.70    5.10
   0  13   6    6.90    5.00
  -1 -13  -6   -3.90    4.30
   1 -13   6    0.30    2.10
  -1 -13  -6    3.90    7.70
  -1 -13  -6    7.40    5.20
   1 -13   6    0.80    3.00
   1 -13   6    0.80    3.60
   1  13   6   -2.00    4.90
  -1  13  -6   -1.90    3.20
  -2 -13  -6   -2.40    4.90
   2 -13   6   -4.60    3.00
  -2 -13  -6   -7.10    7.90
  -2 -13  -6    3.40    4.00
   2 -13   6    1.20    3.30
   2  13   6   -5.40    4.60
  -2  13  -6    0.40    3.20
   3 -13   6   13.80    5.00
  -3 -13  -6   35.90    8.40
  -3 -13  -6   26.70    7.40
   3  13   6   17.70   10.40
   3  13   6   12.20    6.40
  -3  13  -6   20.20    4.00
   4 -13   6   -3.00    6.00
  -4 -13  -6    7.00    8.40
  -4 -13  -6    4.30    4.90
   4  13   6   25.90   12.10
  -4  13  -6   -2.10    4.30
   4  13   6    0.10    6.80
  -5 -14   6   -5.40    6.00
  -5 -14   6    1.20    7.40
   5 -14  -6   -1.20    8.70
  -5  14   6  -16.30    8.00
   5  14  -6   -8.90    9.10
  -5  14   6    4.50    7.60
  -4 -14   6   -3.10    5.00
  -4 -14   6   12.60    7.80
   4 -14  -6   -7.30    7.00
  -4  14   6    4.60    6.60
  -4  14   6    3.20    7.00
   4  14  -6   13.30    7.00
   3 -14  -6    8.40    7.10
  -3 -14   6   14.60    4.80
  -3 -14   6   16.10    7.20
  -3  14   6    6.80    4.70
  -3  14   6   -1.10    6.20
  -2 -14   6   11.60    4.00
   2 -14  -6    8.80    4.90
   2 -14  -6    9.80    8.20
  -2 -14   6    9.70    5.50
  -2 -14   6    9.70    2.80
  -2  14   6    2.50    4.20
  -1 -14   6   80.79    4.40
   1 -14  -6   80.89   12.10
  -1 -14   6   84.79    5.90
   1 -14  -6  101.89    9.60
  -1 -14   6   89.79    8.60
  -1  14   6   68.99    7.10
   0 -14  -6   -0.30    4.20
   0 -14   6   -3.90    4.00
   0 -14  -6   -0.20    5.10
   0 -14  -6    5.20    8.30
   0 -14   6    5.50    3.20
   0 -14   6    1.40    1.90
   0  14   6   -1.00    3.80
   1 -14   6   -1.60    3.80
   1 -14   6   -3.20    2.30
   1 -14   6    4.50    3.70
  -1 -14  -6    3.10    4.90
  -1 -14  -6    0.40    5.60
  -1 -14  -6   -8.50    7.50
  -1  14  -6   -5.30    4.10
   1  14   6   -5.50    5.40
  -2 -14  -6    3.20    5.80
   2 -14   6   -2.90    3.20
  -2 -14  -6    4.50    9.30
  -2 -14  -6    3.90    6.30
   2 -14   6    1.80    3.80
   2  14   6    0.80    4.20
  -2  14  -6   -1.60    3.90
   3 -14   6   10.70    5.00
  -3 -14  -6    2.30    6.70
  -3 -14  -6   -3.10    7.40
  -3  14  -6   -0.20    3.70
  -3  14  -6    0.60    3.70
   3  14   6    5.30   12.30
   3  14   6    4.90    6.80
  -4 -14  -6    4.60    9.20
  -4 -14  -6   -8.00    8.00
   4 -14   6    9.10    6.90
   4  14   6    5.90    8.00
   4  14   6   25.90   12.00
  -4  14  -6    5.20    5.10
  -4 -15   6  -12.60    5.60
   4 -15  -6   -4.60    7.70
  -4 -15   6   -1.50    6.40
  -4  15   6   -4.90    5.80
  -4  15   6    5.80    8.00
   4  15  -6    7.90    8.20
   3 -15  -6   18.80    8.00
  -3 -15   6   17.20    5.30
  -3 -15   6   16.10    7.50
  -3 -15   6   11.70    4.40
  -3  15   6   13.80    7.50
  -2 -15   6   -2.80    5.70
  -2 -15   6   10.90    4.30
  -2 -15   6   20.00    3.50
   2 -15  -6    8.90    9.30
   2 -15  -6   31.70    7.80
  -2  15   6   12.90    7.10
   1 -15  -6    7.20    7.20
  -1 -15   6   11.80    3.90
   1 -15  -6    8.30    5.90
  -1 -15   6   12.00    2.80
  -1 -15   6   22.80    4.70
  -1  15   6   15.90    5.10
   0 -15  -6   10.80    6.90
   0 -15   6   -0.50    5.00
   0 -15   6    4.40    3.40
   0 -15   6    1.30    2.30
   0 -15  -6    2.10    5.70
   0 -15  -6   -5.00    7.30
   0  15   6    3.10    4.80
  -1 -15  -6    2.10    4.50
   1 -15   6   -1.80    2.70
  -1 -15  -6   -2.70    6.10
  -1 -15  -6    7.80   10.00
   1 -15   6    5.50    3.90
   1 -15   6    2.80    4.80
   1  15   6    0.70    4.80
  -1  15  -6    1.90    5.00
   2 -15   6    6.50    5.70
   2 -15   6    3.40    4.50
  -2 -15  -6   13.00   10.10
  -2 -15  -6   -3.00    4.60
   2 -15   6    5.30    3.60
  -2 -15  -6    5.70    7.30
   2  15   6   -2.30    6.80
  -2  15  -6   -0.20    4.50
   3 -15   6   15.90    5.70
  -3 -15  -6   -4.30    7.70
  -3 -15  -6    7.50    8.70
   3  15   6   14.50    6.20
  -3  15  -6    9.30    5.00
  -3  15  -6   11.60    4.40
  -3 -16   6    5.90    4.70
   3 -16  -6  -14.00    7.80
  -3 -16   6  -11.20    7.40
  -3 -16   6    5.80    5.50
   3 -16  -6  -17.80   10.40
  -3  16   6   -9.50    5.50
  -2 -16   6    5.40    7.00
  -2 -16   6    8.40    5.00
   2 -16  -6    0.20    7.30
   2 -16  -6   17.60   10.40
  -2 -16   6   19.00    3.80
  -2  16   6    1.80    5.00
  -1 -16   6    7.60    4.60
   1 -16  -6    3.40    9.10
  -1 -16   6   -0.20    2.70
  -1 -16   6    0.20    6.00
   1 -16  -6    7.70    6.60
  -1  16   6    2.90    6.60
   0 -16  -6   17.30    9.40
   0 -16   6   18.70    6.10
   0 -16   6   21.90    5.00
   0 -16  -6   15.60    6.90
   0 -16  -6   21.90    8.00
   0 -16   6   17.80    3.30
   0  16   6   18.30    6.10
   1 -16   6   -2.30    5.20
  -1 -16  -6    2.40    7.00
   1 -16   6   -6.70    5.00
  -1 -16  -6   -7.70    7.10
  -1 -16  -6    5.30    8.20
   1 -16   6    0.70    3.20
   1  16   6   -7.20    5.20
  -1  16  -6   -6.30    5.40
  -2 -16  -6    4.70    8.40
   2 -16   6    2.30    6.30
  -2 -16  -6    0.00    8.90
   2 -16   6    2.00    4.70
  -2 -16  -6    5.30    7.30
   2 -16   6    6.60    5.00
   2  16   6    5.10    5.70
  -2  16  -6   -3.80    5.30
  -2 -17   6   13.10    3.90
   2 -17  -6    8.60    6.40
  -2 -17   6   13.90    5.90
  -2 -17   6   33.30    7.80
   2 -17  -6    7.70   11.20
  -2  17   6    5.20    7.20
   1 -17  -6    3.80   11.40
  -1 -17   6   -2.20    5.10
   1 -17  -6    9.10    6.20
  -1 -17   6   -1.10    3.10
  -1 -17   6    2.20    7.00
  -1  17   6   -1.90    7.60
   0 -17   6    7.20    3.30
   0 -17  -6   10.90    7.50
   0 -17   6   12.40    6.70
   0 -17  -6    3.80    5.40
   0 -17   6    7.80    4.90
   0 -17  -6    4.70   11.60
   0  17   6   -8.30    5.40
   1 -17   6   -4.90    6.30
  -1 -17  -6    8.80   12.70
  -1 -17  -6   18.70    8.20
   1 -17   6    8.00    6.20
  -1 -17  -6  -10.80    8.50
   1 -17   6    5.00    3.70
   1  17   6   -8.60    7.30
  -1  17  -6    4.20    6.70
  -7   0   7    9.80    5.80
   7   0  -7   -2.40    7.00
  -6   0   7    2.20    5.10
   6   0  -7   -7.40    4.60
  -5   0   7   67.99    7.00
   5   0  -7   71.89    6.80
  -4   0   7   -0.30    2.40
   4   0  -7   -0.90    2.60
  -3   0   7   78.09    5.00
   3   0  -7   76.19    5.30
  -2   0   7    0.30    1.40
   2   0  -7   -0.50    1.40
   1   0  -7 2007.20   41.50
   1   0  -7 2035.30   43.20
   0   0  -7   -0.40    1.30
   0   0  -7    0.40    2.10
   1   0   7   38.40    4.40
  -1   0  -7   43.90    4.10
   1   0   7   38.90    2.50
   2   0   7    0.50    1.00
   2   0   7    0.80    3.10
  -2   0  -7    3.10    2.80
   3   0   7    9.70    4.30
   3   0   7    9.00    1.40
  -3   0  -7   13.80    4.40
   4   0   7   -4.10    5.10
  -4   0  -7   -8.00    4.40
  -5   0  -7   16.00    6.20
   5   0   7   25.10    7.30
  -6   0  -7   -3.00    8.50
   6   0   7    8.20    9.30
   7  -1  -7    3.10    7.90
  -7  -1   7    7.30    4.60
   7   1  -7    0.00    7.80
  -7   1   7   16.00    7.40
   6  -1  -7    3.00    5.40
  -6  -1   7   -1.80    3.70
  -6   1   7   -0.10    4.70
   6   1  -7   -4.80    4.50
   5  -1  -7    2.90    3.30
  -5  -1   7    4.40    2.40
  -5   1   7    2.10    2.80
   5   1  -7   -1.40    3.30
   4  -1  -7    1.50    2.80
  -4  -1   7    2.00    2.40
  -4   1   7   -1.40    2.60
   4   1  -7    1.30    3.00
  -3  -1   7   41.50    4.00
   3  -1  -7   47.60    4.50
   3   1  -7   43.90    4.50
  -3   1   7   44.80    4.10
  -2  -1   7    6.80    1.70
   2  -1  -7    9.80    2.30
   2   1  -7    8.00    2.10
  -2   1   7    9.20    2.10
   1  -1  -7   67.49    5.00
   1  -1  -7   74.59    4.10
   1   1  -7   69.39    4.30
   1   1  -7   71.39    3.60
   0  -1  -7   30.00    4.00
   0  -1  -7   31.70    3.30
   0   1  -7   31.50    2.60
   0   1  -7   31.00    3.30
   1  -1   7   10.60    1.50
  -1  -1  -7   15.10    3.30
   1  -1   7   13.10    3.00
   1   1   7   11.00    3.30
   1   1   7   12.60    2.10
  -1   1  -7   12.10    2.70
   2  -1   7    0.90    0.70
  -2  -1  -7   -1.30    2.50
   2  -1   7   -1.10    2.80
  -2   1  -7    2.70    2.40
   2   1   7    1.70    1.30
   2   1   7   -1.10    3.10
   3  -1   7    1.80    3.70
  -3  -1  -7    2.80    3.70
   3   1   7   -0.90    1.30
  -3   1  -7    0.90    3.00
   3   1   7   -1.90    4.20
  -4  -1  -7    0.50    1.50
   4  -1   7    4.00    5.10
  -4  -1  -7    3.90    5.10
   4   1   7   -1.70    5.50
  -4   1  -7    0.80    4.20
  -5  -1  -7   14.00    2.60
   5  -1   7   13.80    7.10
  -5  -1  -7   12.80    5.40
  -5   1  -7   13.10    6.60
   5   1   7   12.30    7.50
   6  -1   7   -1.40    9.10
  -6  -1  -7    4.50    6.00
  -6  -1  -7    1.20    2.60
  -6   1  -7    4.50    6.30
   6   1   7  -15.60   10.00
   7  -2  -7    7.10    5.80
  -7  -2   7   14.90    5.70
  -7   2   7    8.30    6.90
   6  -2  -7    2.80    4.30
  -6  -2   7   11.90    4.50
  -6   2   7    2.50    3.80
   6   2  -7   -2.00    5.00
   5  -2  -7   -4.80    3.90
  -5  -2   7   -0.30    3.10
  -5   2   7   -4.10    3.80
   5   2  -7   -4.50    4.20
  -4  -2   7   32.90    4.50
   4  -2  -7   32.80    5.10
  -4   2   7   38.10    5.10
   4   2  -7   33.00    4.50
   3  -2  -7    7.90    3.00
  -3  -2   7   19.00    2.90
   3   2  -7   13.80    3.00
  -3   2   7   14.00    2.80
   2  -2  -7   57.89    4.20
  -2  -2   7   58.69    3.40
  -2   2   7   60.99    4.30
   2   2  -7   56.69    3.70
   1  -2  -7   85.69    4.70
   1  -2  -7   84.79    5.90
   1   2  -7   93.59    3.70
   0  -2  -7  376.76   12.50
   0  -2  -7  364.46   10.70
   0   2   7  374.66   10.50
   0   2  -7  362.26    9.10
  -1  -2  -7   -4.90    2.20
   1  -2   7   -0.80    1.90
   1   2   7   -0.20    3.00
   1   2   7   -0.40    1.20
  -1   2  -7   -3.30    1.60
  -2  -2  -7   41.60    4.60
   2  -2   7   45.70    5.00
   2  -2   7   40.30    1.30
   2   2   7   41.40    6.00
  -2   2  -7   40.40    4.50
   2   2   7   39.00    3.30
   3  -2   7   44.10    6.10
  -3  -2  -7   53.89    7.10
  -3  -2  -7   51.89    3.60
   3   2   7   47.20    3.60
   3   2   7   52.79    7.70
  -3   2  -7   50.59    5.80
  -4  -2  -7    3.70    2.20
  -4  -2  -7    4.70    5.20
   4  -2   7    5.70    4.80
  -4   2  -7    6.40    3.90
   4   2   7   -1.20    6.20
  -5  -2  -7    5.60    3.00
   5  -2   7    5.50    7.20
  -5  -2  -7    2.40    7.10
   5   2   7   17.30    8.40
  -5   2  -7    5.10    6.00
  -6  -2  -7   15.90    8.90
   6  -2   7   -0.80    8.90
  -6  -2  -7    2.30    3.50
  -6   2  -7   -5.00    7.60
   6   2   7   -5.00    9.00
   7  -3  -7  -10.50    7.00
  -7  -3   7   -2.10    5.50
  -7   3   7  -13.10    6.20
   7   3  -7    3.50    7.80
  -6  -3   7   -8.90    4.00
   6  -3  -7   -8.70    5.40
  -6   3   7   -1.90    5.00
   6   3  -7   -4.40    4.70
  -5  -3   7   -1.90    2.70
   5  -3  -7   -1.90    4.30
  -5   3   7    3.20    3.90
   5   3  -7    7.40    4.10
   4  -3  -7   -2.40    2.90
  -4  -3   7    3.60    2.50
   4   3  -7   -2.00    2.70
  -4   3   7    0.60    2.80
  -3  -3   7    0.30    1.80
   3  -3  -7    3.80    2.50
   3   3  -7    1.90    2.00
  -3   3   7    0.20    2.30
   2  -3  -7    8.00    2.80
  -2  -3   7    8.30    1.60
  -2   3   7    7.10    2.40
   2   3  -7   10.20    2.10
   1  -3  -7   65.09    4.30
   1  -3  -7   65.79    5.70
   1   3  -7   63.09    2.70
   0  -3  -7   58.39    5.20
   0  -3  -7   54.29    3.80
   0   3   7   50.49    3.70
   0   3  -7   50.79    2.50
  -1  -3  -7   93.39    7.00
   1  -3   7   89.79    5.10
   1   3   7  102.79    5.00
   1   3   7  106.79    7.40
  -1   3  -7   98.19    4.70
   2  -3   7   -1.30    2.40
  -2  -3  -7   -7.60    2.90
  -2   3  -7    2.60    2.20
   2   3   7   -0.60    2.30
   2   3   7    2.90    1.80
   3  -3   7    7.50    3.70
  -3  -3  -7    0.90    4.10
  -3  -3  -7    8.70    2.40
   3   3   7    6.50    2.10
   3   3   7    7.60    5.40
  -3   3  -7   11.40    3.30
  -4  -3  -7    2.10    2.50
   4  -3   7    0.70    4.50
  -4  -3  -7    2.60    5.70
   4   3   7   -3.10    2.20
   4   3   7    1.50    4.80
  -4   3  -7   -0.60    4.00
  -5  -3  -7   15.70    4.00
   5  -3   7   27.40    7.20
  -5  -3  -7   10.70    5.70
  -5   3  -7   20.40    6.60
   5   3   7   27.30    9.60
  -6  -3  -7    3.80    4.30
  -6  -3  -7   -4.50    8.90
   6  -3   7    2.70    9.30
   6   3   7   -5.30    7.80
  -6   3  -7   -3.70    7.80
  -7  -4   7  -11.10    5.60
  -7  -4   7    6.50    7.50
   7  -4  -7    3.00    9.00
  -7   4   7    8.90    5.80
   7   4  -7    7.70    8.90
   6  -4  -7    9.50    6.20
  -6  -4   7    1.50    4.50
   6   4  -7   10.10    6.30
  -6   4   7    8.80    5.70
  -5  -4   7   -3.20    3.40
   5  -4  -7    3.70    4.10
   5   4  -7   -3.30    4.40
  -5   4   7    1.70    4.00
   4  -4  -7   46.10    6.20
  -4  -4   7   49.20    4.90
  -4   4   7   44.10    5.60
   4   4  -7   44.50    5.80
  -3  -4   7   24.80    3.10
   3  -4  -7   27.30    3.50
   3   4  -7   29.10    3.90
  -3   4   7   23.40    4.10
  -2  -4   7  222.08    6.30
   2  -4  -7  211.58    8.70
  -2   4   7  214.58    8.60
   2   4  -7  214.08    6.80
   1  -4  -7   28.00    3.80
   1  -4  -7   30.80    4.80
  -1   4   7   25.40    3.40
   1   4  -7   24.80    1.70
   1   4  -7   28.10    1.50
   0  -4  -7  133.79    7.80
   0  -4  -7  110.99    6.00
   0   4  -7  118.29    3.10
   0   4  -7  117.89    3.30
   0   4   7  125.79    5.90
   1  -4   7    3.80    1.90
  -1  -4  -7    2.70    2.60
   1  -4   7    4.80    1.30
   1   4   7    5.10    2.10
   1   4   7    6.90    3.70
  -2  -4  -7    1.20    2.10
  -2  -4  -7    2.60    3.40
   2  -4   7    5.40    2.80
  -2   4  -7    4.50    2.00
   2   4   7    3.20    2.10
   2   4   7    2.00    4.50
   3  -4   7   16.60    4.40
  -3  -4  -7   21.00    6.40
  -3  -4  -7   26.70    3.50
   3   4   7   22.10    3.10
  -3   4  -7   24.10    4.00
   3   4   7   25.60    6.80
  -4  -4  -7    2.50    4.70
  -4  -4  -7    8.30    3.10
   4  -4   7   -5.40    4.20
   4   4   7    2.50    2.70
   4   4   7   -1.10    7.20
  -4   4  -7    4.70    4.20
  -5  -4  -7   38.10    5.20
  -5  -4  -7   51.89   10.00
   5  -4   7   31.60    7.30
  -5   4  -7   38.40    7.40
   5   4   7   46.00    8.90
  -6  -4  -7   12.30    5.40
  -6  -4  -7   -0.30    9.20
   6  -4   7   -0.60    9.20
  -6   4  -7    7.20    8.00
   6   4   7   10.50   11.20
  -7  -5   7    0.90    6.30
   7  -5  -7  -10.20    8.80
  -7  -5   7    1.90    6.30
  -7   5   7    0.90    5.10
   7   5  -7    6.10    8.80
  -6  -5   7   -3.20    5.80
   6  -5  -7   -1.00    4.80
  -6  -5   7    3.30    4.80
   6   5  -7    5.30    6.50
  -6   5   7   10.70    4.90
   5  -5  -7   -0.40    3.40
  -5  -5   7    0.50    3.60
   5   5  -7    3.20    4.70
  -5   5   7    8.50    4.70
   4  -5  -7   57.29    6.70
  -4  -5   7   55.69    5.30
   4   5  -7   66.69    6.20
  -4   5   7   62.79    6.40
  -3  -5   7   17.60    2.80
   3  -5  -7   19.10    3.50
   3   5  -7   19.70    3.40
  -3   5   7   21.40    3.90
   2  -5  -7  209.68    8.90
  -2  -5   7  193.98    5.70
  -2   5   7  191.38    8.50
   2   5  -7  200.68    6.40
   1  -5  -7   10.10    2.70
   1  -5  -7   11.10    4.00
  -1   5   7    5.10    2.10
   0  -5  -7   12.00    3.50
   0  -5  -7   13.10    3.10
   0  -5   7   14.00    2.30
   0   5   7   16.80    3.20
   1  -5   7  109.69    4.80
  -1  -5  -7  123.09    8.70
   1  -5   7  111.69    4.20
  -1   5  -7  113.19    4.20
   1   5   7  116.09    8.90
   1   5   7  120.79    6.20
  -2  -5  -7    2.50    2.40
  -2  -5  -7    0.50    4.00
   2  -5   7    0.60    2.40
   2   5   7    6.50    2.60
   2   5   7    2.40    4.60
  -2   5  -7    0.50    2.00
  -3  -5  -7    5.60    2.60
  -3  -5  -7    1.50    4.50
   3  -5   7    2.50    3.80
   3   5   7    5.20    2.60
   3   5   7    4.80    4.70
  -3   5  -7    4.20    2.80
  -4  -5  -7   34.60    5.00
   4  -5   7   22.50    6.00
  -4  -5  -7   43.60    8.40
   4   5   7   57.29   10.20
  -4   5  -7   30.30    5.60
   4   5   7   28.70    4.00
   5  -5   7    6.10    6.40
  -5  -5  -7   15.10    4.50
  -5  -5  -7   33.50    9.70
  -5   5  -7   21.40    6.20
   5   5   7   17.40    9.60
  -6  -5  -7   -5.00    9.00
  -6  -5  -7    5.60    5.40
   6  -5   7   -5.20    8.60
   6   5   7    4.80   12.10
  -6   5  -7   -9.30    7.90
   7  -6  -7   -1.80    9.30
  -7  -6   7   -3.40    8.10
  -7  -6   7   -6.50    6.50
  -7   6   7    2.60    8.30
   7   6  -7  -11.20    8.90
   6  -6  -7    4.40    5.10
  -6  -6   7   13.20    6.80
  -6  -6   7   -3.30    4.40
   6   6  -7    6.90    6.50
  -6   6   7    1.90    5.60
  -5  -6   7   -0.10    3.90
  -5  -6   7    4.20    5.30
   5  -6  -7   -1.40    4.00
  -5   6   7    4.00    3.60
   5   6  -7   -1.80    5.00
  -4  -6   7   65.39    7.20
   4  -6  -7   62.39    7.00
  -4  -6   7   63.09    5.20
   4   6  -7   51.19    6.50
  -4   6   7   56.19    6.50
  -3  -6   7   27.50    3.20
   3  -6  -7   35.50    4.70
  -3  -6   7   30.60    4.90
  -3   6   7   47.20    5.70
   3   6  -7   34.00    4.20
  -2  -6   7    2.70    2.70
  -2  -6   7    5.90    1.30
   2  -6  -7    6.40    3.20
   2   6  -7    7.20    1.70
  -2   6   7    6.90    2.30
  -2   6   7    8.20    3.00
   1  -6  -7    3.90    2.70
  -1  -6   7    2.10    2.20
   1  -6  -7    0.10    2.10
  -1   6   7   -1.70    1.60
   0  -6  -7   38.70    4.10
   0  -6   7   30.90    3.30
   0  -6  -7   39.50    5.80
   0   6   7   33.80    4.20
  -1  -6  -7   29.60    3.90
   1  -6   7   27.20    2.60
   1  -6   7   28.20    2.50
  -1  -6  -7   28.00    5.90
   1   6   7   30.40    4.20
  -1   6  -7   29.20    1.90
   1   6   7   23.60    6.00
   2  -6   7   16.10    3.50
  -2  -6  -7   22.80    5.80
  -2  -6  -7   18.50    3.50
  -2   6  -7   19.90    2.80
   2   6   7   22.60    3.70
   2   6   7   11.60    5.10
   3  -6   7   -1.80    3.10
  -3  -6  -7   -4.90    2.70
  -3  -6  -7    3.10    4.00
   3   6   7    4.90    5.70
   3   6   7   -2.20    2.70
  -3   6  -7   -2.90    2.60
  -4  -6  -7   35.20    5.10
   4  -6   7   25.40    6.20
  -4  -6  -7   25.40    8.20
   4   6   7   22.90    7.00
  -4   6  -7   18.00    4.80
   4   6   7   29.80    4.70
  -5  -6  -7    6.30    8.90
   5  -6   7    2.70    6.50
  -5  -6  -7   -7.40    4.10
  -5   6  -7   -0.40    5.20
   5   6   7  -14.30    9.60
  -6  -6  -7   -8.50   10.10
   6  -6   7  -15.20    8.20
  -6  -6  -7    0.40    5.80
  -6   6  -7    1.00    7.40
   6   6   7  -18.10   12.80
  -7  -7   7   -0.90    6.80
  -7  -7   7    7.00    6.50
   7  -7  -7    8.20    9.90
  -7   7   7   -1.30    8.10
   7   7  -7   15.30    9.00
   6  -7  -7    6.70    6.60
  -6  -7   7    6.80    5.70
  -6  -7   7   10.10    5.20
   6   7  -7    7.30    6.80
  -6   7   7    0.00    6.20
  -5  -7   7   13.20    4.70
  -5  -7   7   12.90    5.60
   5  -7  -7    1.70    5.20
  -5   7   7    9.10    5.40
   5   7  -7    8.90    5.30
  -4  -7   7   29.10    5.10
  -4  -7   7   33.10    4.70
   4  -7  -7   28.10    5.70
   4   7  -7   25.00    4.90
  -4   7   7   22.80    4.70
  -3  -7   7   -2.00    1.90
  -3  -7   7    1.10    2.50
   3  -7  -7    5.50    3.70
  -3   7   7   -1.20    2.90
   3   7  -7    0.30    2.60
  -3   7   7    2.20    3.40
  -2  -7   7    6.30    2.40
  -2  -7   7    2.40    1.10
   2  -7  -7    2.70    2.90
  -2   7   7   -0.90    2.80
  -2   7   7    6.60    3.60
   2   7  -7    1.00    1.50
   1  -7  -7   15.40    3.50
   1  -7  -7   21.80    5.60
  -1  -7   7   16.20    3.10
  -1   7   7   14.10    3.70
   0  -7  -7    6.20    3.30
   0  -7  -7   11.00    4.10
   0  -7   7   10.60    2.40
   0   7   7   14.00    3.00
  -1  -7  -7   58.09    7.70
   1  -7   7   51.79    3.60
  -1  -7  -7   54.69    4.90
   1  -7   7   50.49    2.90
   1   7   7   52.89    8.10
  -1   7  -7   48.30    2.10
   1   7   7   43.40    5.20
  -2  -7  -7    3.40    3.80
   2  -7   7    3.40    0.80
   2  -7   7   -2.00    2.40
  -2  -7  -7    0.20    2.60
   2   7   7    5.80    4.20
   2   7   7    7.30    2.90
  -3  -7  -7   -5.20    5.10
  -3  -7  -7   -0.70    3.20
   3  -7   7    3.40    3.70
   3   7   7    2.70    6.70
   3   7   7    2.80    3.40
  -3   7  -7   -0.90    2.60
   4  -7   7   16.60    5.40
  -4  -7  -7   13.30    7.30
  -4  -7  -7   21.50    4.70
   4   7   7   -8.90    6.70
   4   7   7   12.10    4.30
  -4   7  -7   10.50    4.10
  -5  -7  -7   16.30    5.70
   5  -7   7   17.70    7.60
  -5  -7  -7   20.60    9.60
   5   7   7   16.50   11.50
  -5   7  -7   13.20    6.20
   5   7   7   11.30    5.00
  -6  -7  -7   10.00    6.80
   6  -7   7    1.40    8.90
  -6  -7  -7   -7.10   11.80
  -6   7  -7   18.90    8.20
   6   7   7  -13.90   15.00
  -7  -8   7  -12.10    8.80
   7  -8  -7    0.30    8.00
  -7  -8   7    6.40    7.00
  -7   8   7   -6.60    7.80
   7   8  -7    2.50    9.70
  -6  -8   7   -0.70    6.60
  -6  -8   7   10.30    6.30
   6  -8  -7    0.10    7.90
   6   8  -7   19.50    7.00
  -6   8   7   -7.70    4.20
   5  -8  -7   -8.40    5.40
  -5  -8   7   -1.40    3.90
  -5  -8   7    7.20    4.50
  -5   8   7    4.20    4.80
  -5   8   7    0.50    5.00
   5   8  -7    9.60    5.20
   4  -8  -7   24.00    5.10
  -4  -8   7   28.40    4.60
  -4  -8   7   22.90    4.90
   4   8  -7   27.60    5.40
  -4   8   7   28.90    6.20
  -4   8   7   26.60    5.10
   3  -8  -7    2.30    3.90
  -3  -8   7    2.40    2.10
  -3  -8   7   -3.10    3.40
  -3   8   7    3.20    3.60
  -3   8   7    0.30    2.50
   3   8  -7   -3.90    2.70
   2  -8  -7    9.20    3.10
  -2  -8   7   13.00    3.80
  -2  -8   7    5.90    1.20
   2   8  -7    6.50    1.70
  -2   8   7    7.00    3.90
  -2   8   7    5.50    3.30
  -1  -8   7    1.30    2.50
   1  -8  -7    1.90    3.60
   1  -8  -7   -0.10    2.20
  -1   8   7   -0.80    2.10
   0  -8   7   12.80    2.70
   0  -8  -7   13.70    3.30
   0  -8  -7   12.90    4.50
   0   8   7   18.40    4.00
  -1  -8  -7    8.00    4.30
  -1  -8  -7    9.80    3.50
   1  -8   7    7.20    1.50
   1  -8   7    7.50    2.10
   1   8   7    6.60    3.00
  -2  -8  -7    0.00    5.40
   2  -8   7    0.10    2.50
   2  -8   7   -0.40    1.10
  -2  -8  -7   -3.50    2.70
   2   8   7    1.20    3.20
   2   8   7   -3.30    6.00
   3  -8   7    3.90    3.70
  -3  -8  -7   -0.80    6.00
  -3  -8  -7   -3.30    3.40
  -3   8  -7    2.00    2.30
   3   8   7    0.80    3.40
   3   8   7   -1.00    5.30
  -4  -8  -7    4.60    6.50
  -4  -8  -7   10.80    4.60
   4  -8   7    8.80    4.90
  -4   8  -7    9.80    3.70
   4   8   7    7.80    4.30
   4   8   7    1.80    8.40
  -5  -8  -7    7.70    6.00
   5  -8   7    4.00    7.60
  -5  -8  -7   -1.90    7.40
   5   8   7  -14.60   10.10
  -5   8  -7    1.60    4.60
   5   8   7   -0.30    5.10
   6  -9  -7   17.80    8.40
  -6  -9   7    3.50    6.30
  -6  -9   7    7.60    7.80
  -6   9   7    4.50    6.50
  -6   9   7   -4.00    6.70
   6   9  -7  -12.90    7.10
  -5  -9   7    8.90    5.20
   5  -9  -7    6.30    6.20
  -5  -9   7   14.10    5.00
  -5   9   7    5.00    4.90
   5   9  -7   10.00    6.20
  -5   9   7   11.90    5.40
  -4  -9   7   -1.60    3.20
  -4  -9   7   -1.40    3.50
   4  -9  -7   -1.10    4.30
  -4   9   7   -0.30    4.30
   4   9  -7    0.80    4.30
  -4   9   7    0.10    4.90
  -3  -9   7    1.80    2.20
  -3  -9   7    3.60    4.00
   3  -9  -7    8.10    4.30
  -3   9   7   -1.80    3.60
   3   9  -7   -0.80    3.10
  -3   9   7    1.90    2.90
  -2  -9   7  102.09    3.60
  -2  -9   7   87.49    6.20
   2  -9  -7  103.89    7.20
  -2   9   7  109.39    7.90
  -2   9   7  121.29    8.20
   1  -9  -7    9.40    6.00
   1  -9  -7    2.10    3.40
  -1  -9   7    8.20    3.30
  -1   9   7    5.70    3.00
   0  -9  -7   -2.50    3.30
   0  -9   7    3.20    2.40
   0  -9  -7   -3.30    4.50
   0   9   7   -0.70    2.20
  -1  -9  -7    7.80    3.10
  -1  -9  -7    9.00    4.10
  -1  -9  -7    9.50    6.00
   1  -9   7    8.20    1.50
   1  -9   7    6.20    2.20
   1   9   7    8.30    3.10
   2  -9   7    8.30    2.70
  -2  -9  -7    4.50    4.90
  -2  -9  -7    3.40    2.70
   2  -9   7    5.20    1.80
  -2   9  -7    2.40    2.10
   2   9   7    0.70    6.90
   2   9   7    4.30    3.70
  -3  -9  -7   34.10    5.90
  -3  -9  -7   27.40    6.90
   3  -9   7   25.80    5.00
   3   9   7   23.40    7.60
   3   9   7   32.20    5.50
  -3   9  -7   25.20    3.70
   4  -9   7    4.80    5.10
  -4  -9  -7   13.40    9.10
  -4  -9  -7    6.00    4.90
   4   9   7    0.30    4.30
   4   9   7   13.80    9.40
  -4   9  -7   -0.30    3.80
   5  -9   7   24.30    8.60
  -5  -9  -7   24.90   12.00
  -5  -9  -7   29.40    6.80
  -5   9  -7   31.10    6.60
   5   9   7   26.30    6.50
   5   9   7   20.90    9.40
  -6 -10   7   14.10    6.70
   6 -10  -7    1.20    7.90
  -6 -10   7   15.10    6.20
   6  10  -7   33.00    9.60
  -6  10   7   12.20    7.40
  -6  10   7   -0.90    7.70
  -5 -10   7   18.10    6.70
  -5 -10   7   24.10    5.60
   5 -10  -7   10.10    6.80
   5  10  -7   29.50    7.10
  -5  10   7   22.60    7.00
  -5  10   7   13.10    5.80
   4 -10  -7    1.40    4.60
  -4 -10   7    7.80    3.80
  -4 -10   7    2.80    3.50
   4  10  -7    2.30    4.60
  -4  10   7    4.40    4.80
  -4  10   7    5.90    4.40
   3 -10  -7   13.20    4.20
  -3 -10   7    9.60    4.80
  -3 -10   7    7.60    2.70
   3  10  -7   11.70    3.90
  -3  10   7   13.80    5.20
  -3  10   7   15.90    5.20
  -2 -10   7  118.49    8.10
   2 -10  -7  119.79    8.50
  -2 -10   7  122.69    4.30
  -2  10   7  121.49    8.10
  -1 -10   7   17.50    3.70
   1 -10  -7   30.80    6.90
   1 -10  -7   21.80    5.10
  -1  10   7   20.20    4.90
   0 -10   7    9.50    3.30
   0 -10  -7   13.20    4.10
   0 -10  -7    1.80    3.80
   0 -10  -7   14.50    6.30
   0  10   7    6.70    4.00
   1 -10   7    2.60    1.70
  -1 -10  -7    5.20    6.30
  -1 -10  -7    2.30    4.30
   1 -10   7    4.50    2.50
   1 -10   7    4.60    1.50
  -1 -10  -7    9.30    4.50
   1  10   7    4.20    2.80
  -2 -10  -7    4.00    5.30
  -2 -10  -7    4.70    3.00
   2 -10   7    4.60    2.60
   2 -10   7    5.20    2.20
   2  10   7   -1.30    7.50
  -2  10  -7    3.90    2.30
   2  10   7    4.50    4.50
   3 -10   7   23.50    5.00
  -3 -10  -7   35.70    9.30
  -3 -10  -7   37.40    6.50
  -3  10  -7   43.10    4.70
   3  10   7   35.00    6.20
   3  10   7   54.79   11.00
  -4 -10  -7   -0.30    6.90
  -4 -10  -7   13.50    5.70
   4 -10   7   -3.30    5.30
   4  10   7    4.00    5.20
   4  10   7   17.80    8.70
  -4  10  -7    4.50    4.00
  -5 -10  -7   -0.80    6.80
   5 -10   7   -9.40    7.30
  -5 -10  -7   13.70   10.40
   5  10   7   -8.20    6.00
   5  10   7   25.20   13.60
  -5  10  -7   -2.80    5.70
  -6 -11   7   -3.50    8.70
   6 -11  -7  -12.50    9.20
  -6 -11   7   14.00    7.30
   6  11  -7   -9.90    9.30
  -6  11   7   -2.10    7.00
  -6  11   7  -12.00    7.90
  -5 -11   7   -1.70    6.80
  -5 -11   7    0.40    4.80
  -5  11   7   -9.50    6.70
   5  11  -7   -2.00    6.40
  -5  11   7   -6.80    4.10
   4 -11  -7   30.80    6.80
  -4 -11   7   31.80    5.40
  -4 -11   7   22.90    7.00
   4  11  -7   28.70    6.10
  -4  11   7   29.60    6.80
  -4  11   7   26.50    5.80
   3 -11  -7   24.10    5.60
  -3 -11   7   18.40    3.60
  -3 -11   7   13.30    4.90
   3  11  -7   28.00    4.50
  -3  11   7   24.40    6.20
  -3  11   7   16.60    6.10
   2 -11  -7   -2.20    6.60
  -2 -11   7    4.40    1.60
  -2 -11   7    7.30    4.00
   2 -11  -7    1.30    3.30
  -2 -11   7    3.70    1.30
  -2  11   7    0.90    3.20
  -1 -11   7   10.10    3.40
   1 -11  -7   19.90    4.80
   1 -11  -7   14.10    5.90
  -1  11   7   13.50    4.20
   0 -11   7    5.00    3.20
   0 -11  -7    3.20    3.90
   0 -11  -7   -3.30    4.30
   0 -11  -7   -3.20    3.20
   0  11   7    4.50    4.40
  -1 -11  -7   -5.00    4.10
  -1 -11  -7   -5.60    5.00
   1 -11   7   -3.70    2.80
   1 -11   7    2.20    1.80
  -1 -11  -7   -3.30    4.60
   1 -11   7   -0.40    1.50
   1  11   7    2.30    3.30
   2 -11   7   -3.00    2.20
   2 -11   7    2.50    2.60
  -2 -11  -7   -0.70    7.40
  -2 -11  -7    2.20    3.20
   2  11   7   -7.80    4.40
   2  11   7    1.40    8.30
  -2  11  -7    4.30    2.20
   3 -11   7    5.00    4.30
  -3 -11  -7   -1.90    3.80
  -3 -11  -7    9.20    8.80
   3  11   7    6.40    9.80
  -3  11  -7   -0.50    2.70
   3  11   7    0.00    3.90
   4 -11   7    7.60    6.20
  -4 -11  -7   15.20    6.70
  -4 -11  -7   15.60   10.60
   4  11   7   11.10    6.10
   4  11   7   -5.40   11.40
  -4  11  -7    5.70    4.20
   5 -11   7   39.50    9.70
  -5 -11  -7   30.20    8.70
  -5 -11  -7   38.00   14.10
  -5  11  -7   32.80    7.30
   5  11   7   35.80    8.50
   5  11   7   55.09   17.30
   5 -12  -7   -1.80    7.90
  -5 -12   7    6.20    5.80
  -5 -12   7    6.50    5.70
   5  12  -7  -11.00    7.30
  -5  12   7   -0.20    5.60
  -5  12   7    9.10    6.60
  -4 -12   7    0.50    6.20
  -4 -12   7   -0.10    4.40
   4 -12  -7    5.70    5.50
  -4  12   7    2.30    5.70
   4  12  -7   -3.90    4.60
  -4  12   7    0.90    6.20
  -3 -12   7   33.40    6.50
  -3 -12   7   39.80    5.10
   3 -12  -7   41.00    7.30
  -3  12   7   32.90    5.80
  -3  12   7   32.30    7.10
  -2 -12   7    5.70    1.70
   2 -12  -7    6.30    3.90
  -2 -12   7   -1.50    4.00
   2 -12  -7    5.50    7.30
  -2 -12   7   12.10    2.20
  -2  12   7    2.10    5.00
   1 -12  -7  148.29   13.80
   1 -12  -7  169.68   10.30
  -1 -12   7  158.98    9.40
  -1  12   7  157.58   10.60
   0 -12  -7   22.80    7.60
   0 -12  -7   27.30    4.90
   0 -12  -7   28.90    6.20
   0 -12   7   17.30    4.20
   0  12   7   20.20    4.50
   1 -12   7    0.30    1.70
   1 -12   7    0.30    3.00
  -1 -12  -7   -1.20    4.90
  -1 -12  -7   -9.40    5.60
  -1 -12  -7   -0.30    4.50
   1 -12   7    1.30    2.00
   1  12   7    3.00    4.80
  -2 -12  -7  -16.10    8.10
   2 -12   7    1.30    2.70
   2 -12   7    4.60    2.80
  -2 -12  -7   -6.10    3.10
   2  12   7    1.00    4.00
  -3 -12  -7   18.80    7.70
  -3 -12  -7   -2.10    5.40
   3 -12   7    9.20    4.70
  -3  12  -7    1.50    3.60
   3  12   7   -3.40    5.60
   3  12   7  -16.50    9.80
  -4 -12  -7   12.10    6.80
   4 -12   7   -5.60    6.00
  -4 -12  -7   16.70   10.70
   4  12   7   -6.50   13.30
   4  12   7    1.80    6.40
  -4  12  -7   -0.80    4.00
   5 -13  -7    0.90    8.40
  -5 -13   7   14.50    6.90
  -5 -13   7   20.50    9.30
  -5  13   7   -5.10    7.80
  -5  13   7   -3.70    5.40
   5  13  -7   -0.10    7.90
  -4 -13   7   11.70    5.00
   4 -13  -7   -0.90    4.40
  -4 -13   7   -3.40    4.90
  -4  13   7    4.00    4.80
  -4  13   7    3.80    7.20
   4  13  -7    2.60    6.00
  -3 -13   7   25.20    4.50
   3 -13  -7   35.00    7.80
  -3 -13   7   18.00    5.90
  -3  13   7   17.30    6.60
  -3  13   7    8.50    6.50
  -2 -13   7    5.20    2.20
  -2 -13   7   11.20    4.30
  -2 -13   7    3.70    1.80
   2 -13  -7   19.00    7.70
   2 -13  -7   -3.30    5.50
  -2  13   7    5.70    4.80
   1 -13  -7  -14.40    7.30
  -1 -13   7    1.30    0.80
   1 -13  -7    9.70    5.60
  -1 -13   7    0.40    0.80
  -1 -13   7    6.10    4.00
  -1  13   7   -0.70    3.80
   0 -13  -7   19.20    6.20
   0 -13   7   10.10    4.20
   0 -13  -7    8.80    7.60
   0 -13  -7    4.70    3.60
   0  13   7   17.70    4.80
   1 -13   7    2.20    2.20
   1 -13   7   10.10    4.00
   1 -13   7   -0.20    1.80
  -1 -13  -7    6.00    5.40
  -1 -13  -7    0.90    5.00
  -1 -13  -7   -5.00    8.10
   1  13   7    0.10    5.60
  -2 -13  -7    7.30    5.10
   2 -13   7    4.90    3.20
  -2 -13  -7   16.30    6.60
   2 -13   7   -0.70    2.80
  -2 -13  -7   -1.70    8.80
   2  13   7  -12.60    5.40
   3 -13   7   -4.40    4.80
  -3 -13  -7    1.90    7.90
  -3 -13  -7    5.30    6.70
   3  13   7  -10.80    8.40
   3  13   7   -5.80    6.50
   4 -13   7   -8.10    6.60
  -4 -13  -7   -0.90    7.00
  -4 -13  -7    4.20    9.10
   4  13   7   40.70   15.40
  -4  13  -7    4.40    4.30
   4  13   7    3.60    7.10
  -4 -14   7   -3.70    5.30
  -4 -14   7    0.60    7.70
   4 -14  -7    2.70    5.50
   4  14  -7    7.30    7.10
  -4  14   7   14.00    7.80
  -4  14   7    5.80    7.80
  -3 -14   7    5.40    3.90
  -3 -14   7    9.90    6.90
   3 -14  -7    3.20    5.10
  -3 -14   7    0.40    3.10
  -3  14   7    0.10    6.50
  -2 -14   7   -1.70    5.40
   2 -14  -7   -7.90    6.70
  -2 -14   7    6.50    1.90
   2 -14  -7   -4.50    6.30
  -2 -14   7    1.70    2.50
  -2  14   7   18.50    6.90
  -1 -14   7    6.60    5.30
  -1 -14   7   18.20    2.40
   1 -14  -7   19.30    7.80
   1 -14  -7   18.30    6.00
  -1 -14   7   19.40    2.00
  -1  14   7   16.70    5.60
   0 -14  -7   -0.50    3.60
   0 -14   7    3.30    1.30
   0 -14  -7    7.00    4.80
   0 -14  -7   20.70    8.20
   0 -14   7    5.10    1.40
   0 -14   7    0.50    4.50
   0  14   7   -2.00    5.20
   1 -14   7   -4.70    2.70
   1 -14   7    0.80    2.00
   1 -14   7   -1.30    3.90
  -1 -14  -7   -0.50    9.80
  -1 -14  -7   18.80    6.70
  -1 -14  -7   -2.10    4.50
   1  14   7  -11.80    5.80
   2 -14   7    1.00    3.10
  -2 -14  -7    0.10    5.80
   2 -14   7   -0.40    4.40
   2 -14   7    2.50    3.30
  -2 -14  -7   -0.50   10.00
  -2 -14  -7   -9.80    6.60
   2  14   7   -7.70    5.70
  -3 -14  -7  -10.70    7.90
   3 -14   7   -0.80    5.40
  -3 -14  -7   10.20    7.50
   3  14   7    1.50   10.00
   3  14   7   -5.10    5.10
   4 -15  -7   -0.70    6.00
  -4 -15   7    2.70    5.90
  -4 -15   7   13.80    9.20
  -4  15   7   -9.30    6.30
  -4  15   7   -9.20    7.60
   3 -15  -7    4.60    5.90
  -3 -15   7    5.10    4.10
  -3 -15   7    4.70    3.30
  -3 -15   7   10.50    8.20
   3 -15  -7  -13.20   11.00
  -3  15   7    0.80    6.90
   2 -15  -7   -6.00    7.70
  -2 -15   7    1.50    2.30
  -2 -15   7   -0.30    2.70
   2 -15  -7  -12.50    4.70
  -2 -15   7    4.50    6.80
  -2  15   7   -1.20    4.90
   1 -15  -7   13.10   10.60
  -1 -15   7   15.10    5.70
   1 -15  -7   11.10    6.80
  -1 -15   7   10.50    2.30
  -1 -15   7   11.50    1.90
  -1  15   7    7.40    6.30
   0 -15  -7   66.39    9.90
   0 -15  -7   94.99   13.80
   0 -15  -7   70.39    7.80
   0 -15   7   62.39    7.90
   0 -15   7   59.69    3.30
   0 -15   7   59.09    3.80
   0  15   7   71.49    9.40
   1 -15   7    2.60    3.50
  -1 -15  -7    2.60    5.30
  -1 -15  -7   11.40    7.00
  -1 -15  -7   -0.50   10.20
   1 -15   7    2.00    4.70
   1 -15   7    3.00    2.40
   1  15   7    2.20    7.40
   2 -15   7    4.20    4.20
   2 -15   7    5.60    3.60
  -2 -15  -7    2.30    8.00
  -2 -15  -7   -5.60    8.70
   2 -15   7    0.40    5.00
  -2 -15  -7   -8.70    6.70
   2  15   7    1.30    5.10
  -3 -15  -7   15.70    7.30
   3 -15   7   -4.20    5.80
  -3 -15  -7   -7.80    5.80
  -3 -15  -7    7.90    9.30
   3  15   7   -6.10    7.90
   3 -16  -7   -7.10    8.60
  -3 -16   7    6.40    4.60
  -3 -16   7    6.40    3.50
   3 -16  -7   -3.50   12.70
  -3 -16   7   -4.20    6.20
  -3  16   7   -7.00    8.20
   2 -16  -7   -3.20    7.80
  -2 -16   7    1.00    2.60
  -2 -16   7    2.60    3.40
   2 -16  -7    2.20   11.00
  -2 -16   7   -3.00    6.40
  -2  16   7   13.20    7.50
   1 -16  -7   14.90    7.60
  -1 -16   7   12.40    2.30
   1 -16  -7   27.00   11.50
  -1 -16   7   14.20    2.80
  -1 -16   7    8.20    6.00
  -1  16   7   12.70    7.40
   0 -16   7   18.00    2.70
   0 -16  -7   26.60    8.70
   0 -16  -7   32.50    6.60
   0 -16   7   13.30    3.00
   0 -16   7   18.60    6.40
   0 -16  -7   24.00   11.30
   0  16   7   26.10    8.60
   1 -16   7   -1.40    2.70
  -1 -16  -7    4.80   11.30
  -1 -16  -7    3.30    5.70
   1 -16   7   -0.50    3.50
  -1 -16  -7    0.50    6.20
   1 -16   7    1.50    4.70
   1  16   7    5.50    7.90
  -2 -16  -7    2.30   12.70
   2 -16   7    8.00    3.90
  -2 -16  -7    8.90    6.30
   2 -16   7    5.40    5.70
  -2 -16  -7   -9.00    8.20
   2 -16   7    4.60    5.10
   2  16   7   -5.20    7.90
   2 -17  -7   -9.00    8.80
  -2 -17   7   17.60    8.50
   2 -17  -7   -0.50   13.00
  -2 -17   7    0.30    3.90
  -2 -17   7   -3.80    3.00
  -2  17   7   -0.40    8.00
  -1 -17   7    3.10    2.60
   1 -17  -7    7.20   11.40
  -1 -17   7    5.30    3.20
  -1 -17   7    6.10    7.00
   1 -17  -7   13.40    8.00
  -1  17   7  -13.80    7.40
   0 -17   7    6.80    6.80
   0 -17  -7   18.40    8.60
   0 -17   7    9.00    2.70
   0 -17  -7   37.60   13.40
   0 -17   7    9.10    3.60
   0 -17  -7   12.30    8.20
   0  17   7   13.90    8.90
   7   0  -8   -6.00    7.20
  -7   0   8   -6.60    4.30
  -6   0   8   -0.20    4.80
   6   0  -8    3.10    5.30
   5   0  -8    2.30    3.10
  -5   0   8    6.30    3.10
   4   0  -8    8.10    3.30
  -4   0   8   10.60    3.30
   3   0  -8    1.50    2.50
  -3   0   8    1.90    1.90
   2   0  -8   20.60    2.70
  -2   0   8   21.50    2.90
   1   0  -8    2.40    1.70
   1   0  -8   -1.10    2.20
   0   0  -8    5.20    2.70
   0   0  -8    4.00    1.80
  -1   0  -8    0.80    2.20
   1   0   8   -0.60    1.20
   1   0   8    0.70    3.00
   2   0   8  381.36   14.20
  -2   0  -8  405.56   14.00
  -3   0  -8    4.50    4.00
   3   0   8    5.20    4.60
   4   0   8   29.20    7.00
  -4   0  -8   17.20    5.80
  -5   0  -8   -4.20    6.00
   5   0   8   -1.70    5.50
   6   0   8   -7.50   10.30
  -6   0  -8   -0.90    8.30
  -7  -1   8    5.40    6.20
   7  -1  -8    0.20    8.10
   7   1  -8   14.30    8.10
  -7   1   8   -1.00    5.60
  -6  -1   8    1.10    4.70
   6  -1  -8    1.20    5.70
  -6   1   8    1.60    4.40
   6   1  -8   -6.20    4.90
  -5  -1   8   26.30    5.10
   5  -1  -8   27.70    4.90
  -5   1   8   26.20    5.60
   5   1  -8   24.00    4.90
   4  -1  -8   45.90    5.60
  -4  -1   8   34.30    4.80
  -4   1   8   39.20    4.30
   4   1  -8   28.20    4.80
  -3  -1   8    2.90    2.00
   3  -1  -8    0.70    2.50
  -3   1   8    3.20    2.40
   3   1  -8   -2.00    2.20
  -2  -1   8    3.80    1.60
   2  -1  -8    1.00    2.00
  -2   1   8    3.90    1.90
   2   1  -8    2.10    1.70
   1  -1  -8   17.50    3.30
   1  -1  -8   15.90    2.70
   1   1  -8   12.50    2.20
   1   1  -8   15.00    2.90
   0  -1  -8  235.98    9.50
   0  -1  -8  235.78    8.10
   0   1  -8  221.18    8.30
   0   1  -8  235.88    7.30
   1  -1   8   -0.40    1.10
  -1  -1  -8   -3.70    2.20
   1  -1   8    8.00    3.00
  -1   1  -8    0.00    2.10
   1   1   8    0.50    3.00
   1   1   8    0.60    1.50
   2  -1   8    2.50    1.10
  -2  -1  -8    3.90    3.30
   2  -1   8    3.60    3.70
   2   1   8    6.20    1.60
  -2   1  -8    8.30    3.20
   2   1   8   -2.90    3.60
   3  -1   8   67.39    7.80
  -3  -1  -8   64.69    7.60
   3   1   8   68.39    8.70
   3   1   8   63.89    3.60
  -3   1  -8   51.09    6.70
   4  -1   8   14.70    6.10
  -4  -1  -8    4.60    6.00
  -4   1  -8    9.00    4.80
   4   1   8    7.20    6.80
   5  -1   8   15.40    7.80
  -5  -1  -8   14.90    7.70
   5   1   8   16.90    8.20
  -5   1  -8   19.20    6.60
  -6  -1  -8   19.90    8.60
   6  -1   8    6.90   10.40
  -6   1  -8   -8.90    8.60
   6   1   8    7.40   10.80
  -7  -2   8   11.60    5.50
   7  -2  -8   -0.80    7.30
  -7   2   8    2.30    6.80
   7   2  -8    6.40    8.90
   6  -2  -8   -1.50    5.30
  -6  -2   8    6.20    4.70
  -6   2   8   10.60    4.80
   6   2  -8   -0.40    5.30
   5  -2  -8   55.59    7.60
  -5  -2   8   48.90    6.40
  -5   2   8   44.90    6.30
   5   2  -8   53.59    7.00
   4  -2  -8   50.29    6.10
  -4  -2   8   65.39    5.30
  -4   2   8   54.49    5.70
   4   2  -8   53.89    5.80
  -3  -2   8    6.40    2.10
   3  -2  -8    5.70    2.60
   3   2  -8    0.90    2.30
  -3   2   8    3.10    2.50
   2  -2  -8   13.80    3.10
  -2  -2   8   17.20    2.50
  -2   2   8   15.90    2.80
   2   2  -8   16.70    2.70
   1  -2  -8  388.46   13.30
   1  -2  -8  391.96   11.50
   1   2  -8  384.06    9.80
   1   2  -8  359.86   11.80
   0  -2  -8    3.60    2.30
   0  -2  -8    1.70    2.50
   0   2  -8    4.50    2.00
   0   2   8    2.80    1.80
   0   2  -8    5.00    1.60
   1  -2   8   23.00    3.70
  -1  -2  -8   19.80    4.20
   1   2   8   21.20    2.90
   1   2   8   21.30    4.80
  -1   2  -8   20.90    3.20
  -2  -2  -8  186.38    9.70
   2  -2   8  177.78    4.50
   2  -2   8  167.98    9.10
   2   2   8  192.88   10.60
   2   2   8  186.68    6.60
  -2   2  -8  180.58    8.20
  -3  -2  -8  160.88   10.70
   3  -2   8  169.28   10.20
   3   2   8  155.28   10.70
  -3   2  -8  174.78    9.10
   3   2   8  166.68    6.30
   4  -2   8   -7.60    5.40
  -4  -2  -8    2.80    5.80
   4   2   8    9.00    7.50
  -4   2  -8   13.00    4.50
  -5  -2  -8   -1.30    7.20
   5  -2   8   10.00    7.30
   5   2   8    7.80    8.20
  -5   2  -8   14.90    6.90
   6  -2   8   -2.10   10.10
  -6  -2  -8   13.90    9.80
   6   2   8    9.80   11.40
  -6   2  -8    7.50    9.20
  -7  -3   8   -5.50    5.20
   7  -3  -8    1.80    6.00
   7   3  -8  -15.50    8.10
  -7   3   8    4.10    7.30
   6  -3  -8   37.70    8.00
  -6  -3   8   30.50    5.80
  -6   3   8   31.10    6.80
   6   3  -8   21.40    7.00
  -5  -3   8   12.50    4.10
   5  -3  -8   19.60    5.60
  -5   3   8   11.90    3.90
   5   3  -8    7.80    4.70
  -4  -3   8   20.50    3.80
   4  -3  -8   17.00    4.40
  -4   3   8   21.10    4.50
   4   3  -8   21.00    4.20
   3  -3  -8    1.40    2.30
  -3  -3   8    4.50    2.00
  -3   3   8    5.50    2.90
   3   3  -8    1.90    2.50
  -2  -3   8    1.30    1.40
   2  -3  -8   -0.60    2.10
  -2   3   8    3.10    2.30
   2   3  -8    1.50    1.70
   1  -3  -8    0.90    1.70
   1  -3  -8    1.80    2.90
   1   3  -8    1.10    1.10
   1   3  -8   -0.90    1.40
   0  -3  -8  140.19    8.10
   0  -3  -8  144.69    6.40
   0   3   8  147.69    6.40
   0   3  -8  139.09    4.50
   1  -3   8   30.50    3.90
  -1  -3  -8   28.30    5.40
   1   3   8   26.40    5.50
   1   3   8   31.70    3.50
  -1   3  -8   28.10    3.40
  -2  -3  -8   -3.20    3.70
   2  -3   8   -0.30    2.70
   2   3   8    3.90    2.00
   2   3   8    3.50    4.20
  -2   3  -8   -2.90    2.30
  -3  -3  -8   97.19    9.60
   3  -3   8   84.09    7.70
  -3   3  -8   76.59    6.20
   3   3   8   71.59    4.80
   3   3   8   70.39    9.40
   4  -3   8   16.50    6.00
  -4  -3  -8   22.30    6.30
  -4  -3  -8   12.90    3.10
   4   3   8   12.10    7.10
   4   3   8   14.30    2.90
  -4   3  -8   20.30    5.50
   5  -3   8    5.20    6.80
  -5  -3  -8    9.00    3.50
  -5  -3  -8   -0.70    6.60
  -5   3  -8    2.20    5.60
   5   3   8    6.00    9.60
   6  -3   8    7.40   10.10
  -6  -3  -8    4.10    8.90
  -6  -3  -8    3.30    4.00
   6   3   8   11.00   12.70
  -6   3  -8   -2.70    8.20
  -7  -4   8    2.70    5.60
   7  -4  -8    3.30    7.30
   7   4  -8   -6.20    8.00
  -7   4   8   -2.50    7.20
   6  -4  -8   40.40    8.90
  -6  -4   8   49.00    6.80
  -6   4   8   29.20    7.20
   6   4  -8   32.20    8.10
   5  -4  -8   37.90    6.60
  -5  -4   8   38.10    5.30
   5   4  -8   29.20    6.00
  -5   4   8   40.00    6.50
   4  -4  -8   29.40    5.30
  -4  -4   8   33.40    4.50
   4   4  -8   34.00    5.10
  -4   4   8   30.80    4.90
   3  -4  -8   55.39    5.20
  -3  -4   8   52.19    4.00
   3   4  -8   49.80    4.60
  -3   4   8   41.60    4.50
  -2  -4   8  256.67    7.30
   2  -4  -8  281.57   10.30
   2   4  -8  261.77    7.80
  -2   4   8  255.67    9.90
   1  -4  -8    4.00    2.70
   1  -4  -8    2.40    2.60
   1   4  -8    4.00    1.10
   1   4  -8    3.50    1.30
  -1   4   8    6.20    2.70
   0  -4  -8    3.50    2.50
   0  -4  -8    3.20    3.20
   0   4  -8    4.70    1.20
   0   4   8    5.10    2.20
   0   4  -8    6.20    1.00
   1  -4   8   33.70    3.60
   1  -4   8   29.00    2.70
  -1  -4  -8   31.10    5.60
   1   4   8   27.10    5.60
   1   4   8   28.10    3.70
   2  -4   8    3.40    3.10
  -2  -4  -8    6.50    3.80
  -2   4  -8   -0.20    1.90
   2   4   8    1.50    2.10
   2   4   8    0.40    3.80
  -3  -4  -8   86.39    5.60
   3  -4   8   85.49    7.90
  -3  -4  -8  100.39   10.20
  -3   4  -8   94.29    6.80
   3   4   8   90.59    5.80
   3   4   8   78.79   10.00
   4  -4   8   22.50    6.20
  -4  -4  -8   22.70    4.00
  -4  -4  -8   16.70    7.70
   4   4   8   22.60    7.30
  -4   4  -8   22.80    5.40
   4   4   8   19.90    3.70
   5  -4   8   -3.90    6.90
  -5  -4  -8   14.00    9.50
  -5  -4  -8    5.50    3.70
  -5   4  -8   -5.90    5.80
   5   4   8   -1.60    8.70
  -6  -4  -8  -10.60    7.40
   6  -4   8   -7.30    9.50
  -6  -4  -8    2.60    4.40
   6   4   8   -6.40   13.00
  -6   4  -8  -14.00    7.90
  -7  -5   8    5.40    8.30
  -7  -5   8   -2.80    6.20
  -7   5   8    1.60    7.90
   7   5  -8  -10.10    8.40
   6  -5  -8   11.20    6.90
  -6  -5   8   -4.40    4.30
  -6  -5   8   -1.70    3.80
   6   5  -8    8.40    6.80
  -6   5   8   -3.10    5.70
   5  -5  -8   14.10    5.70
  -5  -5   8   12.10    4.00
   5   5  -8   19.10    4.80
  -5   5   8   15.40    5.10
  -4  -5   8   30.10    4.00
   4  -5  -8   29.10    5.60
   4   5  -8   25.70    4.70
  -4   5   8   27.30    5.20
   3  -5  -8   35.20    5.10
  -3  -5   8   38.70    3.60
   3   5  -8   29.00    4.00
  -3   5   8   34.20    5.10
  -2  -5   8    0.80    1.10
   2  -5  -8    0.20    1.90
  -2   5   8    3.00    2.80
   2   5  -8    0.60    1.50
  -2   5   8    1.60    2.00
   1  -5  -8   24.00    5.30
   1  -5  -8   29.60    4.20
  -1   5   8   22.10    3.40
   0  -5  -8   20.40    4.70
   0  -5  -8   18.70    3.70
   0  -5   8   11.70    2.60
   0   5   8   13.20    3.10
   1  -5   8   34.80    3.30
   1  -5   8   38.70    2.90
  -1  -5  -8   44.50    6.70
   1   5   8   36.00    6.20
  -1   5  -8   38.80    2.80
   1   5   8   41.70    4.50
  -2  -5  -8   24.10    3.70
  -2  -5  -8   16.70    4.70
   2  -5   8   20.60    3.90
   2   5   8   21.40    6.50
   2   5   8   21.10    3.70
  -2   5  -8   18.70    3.00
  -3  -5  -8   21.40    4.10
   3  -5   8   17.70    4.80
  -3  -5  -8   27.00    6.90
  -3   5  -8   25.40    4.20
   3   5   8   20.70    3.90
   3   5   8   25.90    7.70
   4  -5   8  181.38   11.60
  -4  -5  -8  157.38   14.10
  -4  -5  -8  173.08    8.50
   4   5   8  187.88    8.70
   4   5   8  163.28   14.10
  -4   5  -8  171.08    9.80
   5  -5   8   -1.40    6.70
  -5  -5  -8   -3.60    4.20
  -5  -5  -8    3.90    9.20
   5   5   8    7.10   10.90
  -5   5  -8    5.80    5.80
   6  -5   8    7.20    9.60
  -6  -5  -8    2.00    5.30
  -6  -5  -8  -12.50    7.80
   6   5   8  -12.00   12.40
  -6   5  -8   -1.20    8.60
  -7  -6   8   -2.90    6.70
   7  -6  -8    3.60    7.40
  -7  -6   8   -6.50    8.20
   7   6  -8   -7.90    9.20
  -7   6   8    1.80    7.40
   6  -6  -8   18.10    7.70
  -6  -6   8   10.40    7.50
  -6  -6   8   16.70    5.60
  -6   6   8   21.30    6.10
   6   6  -8   20.10    8.00
  -5  -6   8    1.50    3.70
   5  -6  -8    5.40    5.90
  -5  -6   8   10.40    5.50
   5   6  -8    4.00    5.00
  -5   6   8    8.50    5.40
  -4  -6   8    2.70    2.60
  -4  -6   8   -0.70    2.90
   4  -6  -8    5.10    3.90
  -4   6   8   -1.80    4.10
   4   6  -8    7.00    3.70
  -3  -6   8  261.07    8.40
   3  -6  -8  279.07   11.80
  -3   6   8  277.27   11.40
   3   6  -8  255.17    9.30
  -2  -6   8  145.49    7.60
   2  -6  -8  144.19    8.10
  -2  -6   8  137.49    4.10
  -2   6   8  139.29    7.90
  -2   6   8  147.69    7.40
   2   6  -8  134.09    4.40
   1  -6  -8   -3.20    4.10
  -1  -6   8    2.00    2.30
   1  -6  -8    1.80    2.30
  -1   6   8    0.80    1.90
   0  -6  -8   39.90    5.10
   0  -6  -8   31.20    5.30
   0  -6   8   31.20    3.60
   0   6   8   30.40    3.60
   1  -6   8  106.19    4.50
  -1  -6  -8  115.89    9.60
   1  -6   8  114.39    4.70
   1   6   8  126.99   10.30
  -1   6  -8  109.19    3.60
   1   6   8  122.89    6.90
   2  -6   8    8.10    3.20
  -2  -6  -8   10.90    4.40
  -2  -6  -8   10.10    3.20
   2   6   8   14.60    3.60
   2   6   8   16.70    6.60
   3  -6   8    5.80    3.90
  -3  -6  -8   -7.60    3.00
  -3  -6  -8   -0.20    5.40
  -3   6  -8   -4.00    2.60
   3   6   8   -0.20    2.70
   3   6   8    0.30    6.40
  -4  -6  -8   15.70    4.40
   4  -6   8   19.70    6.00
  -4  -6  -8   17.00    8.50
   4   6   8   17.20    4.40
   4   6   8   14.70    8.90
  -4   6  -8   19.20    4.80
  -5  -6  -8    8.90    9.80
  -5  -6  -8   -6.80    4.50
   5  -6   8   -2.80    6.80
   5   6   8   -7.40    3.60
  -5   6  -8    0.00    6.10
   5   6   8   -4.10    9.60
  -7  -7   8   -9.50    6.60
   7  -7  -8   13.20    8.40
  -7  -7   8    5.10    8.80
  -7   7   8    5.60    6.40
   7   7  -8   -0.60    9.10
   6  -7  -8   -7.30    6.80
  -6  -7   8   -1.30    5.50
  -6  -7   8   -1.00    6.70
   6   7  -8  -10.70    6.50
  -6   7   8   -8.10    5.60
  -5  -7   8   21.40    5.30
   5  -7  -8   22.20    6.80
  -5  -7   8   21.10    6.60
  -5   7   8   28.00    5.60
   5   7  -8   18.80    5.80
  -4  -7   8   24.00    4.00
   4  -7  -8   19.30    4.80
  -4  -7   8   19.70    4.90
  -4   7   8   23.90    5.40
   4   7  -8   24.40    4.70
  -3  -7   8   14.40    4.40
   3  -7  -8   24.80    5.00
  -3  -7   8   16.60    2.50
  -3   7   8   22.10    4.70
   3   7  -8   15.40    3.20
  -3   7   8   19.50    4.70
  -2  -7   8   14.40    1.30
   2  -7  -8   22.50    4.00
  -2  -7   8   14.90    3.40
  -2   7   8   16.00    4.20
  -2   7   8   17.60    3.60
   1  -7  -8    7.30    2.90
  -1  -7   8    2.20    2.60
   1  -7  -8    5.60    3.80
  -1   7   8    3.40    2.70
   0  -7  -8   10.40    4.10
   0  -7   8    8.40    2.50
   0  -7  -8   12.90    3.30
   0   7   8    9.20    3.40
  -1  -7  -8    4.30    4.70
   1  -7   8    2.50    1.80
   1  -7   8    1.80    1.20
  -1  -7  -8    0.40    2.70
  -1   7  -8    0.70    0.60
   1   7   8    2.20    3.00
  -2  -7  -8    7.20    5.80
  -2  -7  -8    6.60    3.40
   2  -7   8    5.90    2.80
   2   7   8    3.00    3.30
   2   7   8    4.50    5.80
  -3  -7  -8   17.70    4.30
  -3  -7  -8   28.30    8.00
   3  -7   8   15.10    4.40
   3   7   8   24.20    7.40
   3   7   8   15.50    4.40
  -3   7  -8   15.50    3.60
  -4  -7  -8  185.58   15.80
   4  -7   8  145.89   10.80
  -4  -7  -8  156.98    9.00
   4   7   8  172.78    9.80
  -4   7  -8  173.28    9.20
   4   7   8  195.38   16.10
   5  -7   8   -3.60    7.00
  -5  -7  -8   -3.20    9.80
  -5  -7  -8  -14.10    4.70
   5   7   8    1.90    8.70
  -5   7  -8    5.40    5.50
   5   7   8    0.90    4.90
  -6  -8   8    5.20    5.50
   6  -8  -8    2.10    7.70
  -6  -8   8    5.40    6.10
  -6   8   8    1.20    7.10
   6   8  -8    6.30    7.10
   5  -8  -8   11.10    6.30
  -5  -8   8    3.80    5.90
  -5  -8   8    4.70    4.40
  -5   8   8    3.60    5.40
   5   8  -8   10.50    5.50
  -5   8   8    8.90    5.50
   4  -8  -8   16.80    4.90
  -4  -8   8   11.80    4.50
  -4  -8   8   13.80    3.50
  -4   8   8   12.60    4.40
   4   8  -8   11.90    4.60
  -4   8   8   18.80    5.00
  -3  -8   8  141.29    5.50
   3  -8  -8  123.89    9.10
  -3  -8   8  140.19    9.10
  -3   8   8  135.79    9.30
  -3   8   8  137.49    9.20
   3   8  -8  127.69    6.60
   2  -8  -8  185.38    9.80
  -2  -8   8  197.58    9.30
  -2   8   8  207.48   10.00
  -2   8   8  179.28    9.10
   1  -8  -8   -0.40    4.70
   1  -8  -8   -1.60    2.60
  -1  -8   8   -1.40    2.40
  -1   8   8    0.00    2.50
   0  -8  -8   -4.10    3.30
   0  -8  -8   -1.80    3.10
   0  -8   8    1.20    2.40
   0   8   8    4.90    3.30
   1  -8   8    1.80    0.90
  -1  -8  -8    6.30    5.80
  -1  -8  -8    1.40    3.90
   1  -8   8    4.40    2.10
  -1  -8  -8    0.70    3.00
   1   8   8    0.50    3.30
  -2  -8  -8   12.50    5.40
   2  -8   8   13.90    3.00
  -2  -8  -8   11.60    3.50
   2  -8   8   12.80    1.50
   2   8   8    3.00    6.70
   2   8   8   20.10    4.50
  -2   8  -8   14.40    2.50
   3  -8   8   -2.40    3.40
  -3  -8  -8   -1.50    3.50
  -3  -8  -8    1.80    6.80
   3   8   8    0.40    3.70
  -3   8  -8   -5.20    2.30
   3   8   8    0.50    6.10
   4  -8   8   40.40    7.40
  -4  -8  -8   42.60    6.30
  -4  -8  -8   57.69    9.90
   4   8   8   32.50    5.60
   4   8   8   71.49   12.00
  -4   8  -8   44.00    5.80
  -5  -8  -8    3.90    6.50
   5  -8   8   16.20    8.20
  -5  -8  -8   15.20    8.80
   5   8   8    3.40    5.30
  -5   8  -8   33.20    6.50
   5   8   8    6.00    9.30
   6  -9  -8    1.30    6.50
  -6  -9   8    8.60    6.20
  -6  -9   8  -11.20    7.80
  -6   9   8    5.20    7.80
  -6   9   8    7.20    6.50
   6   9  -8  -14.10    7.30
  -5  -9   8    5.60    4.80
   5  -9  -8   -8.30    4.80
  -5  -9   8    2.00    4.50
  -5   9   8    8.20    6.70
   5   9  -8    0.20    5.60
  -5   9   8   21.50    5.90
  -4  -9   8   24.10    4.10
   4  -9  -8   24.70    5.70
  -4  -9   8   28.20    5.30
   4   9  -8   25.30    5.40
  -4   9   8   28.50    5.90
  -4   9   8   17.30    5.90
  -3  -9   8    9.60    4.40
   3  -9  -8    4.80    4.30
  -3  -9   8    8.10    2.20
   3   9  -8    4.10    3.10
  -3   9   8    3.90    4.80
  -3   9   8    8.10    4.20
   2  -9  -8   65.79    7.40
   2  -9  -8   46.70    7.90
  -2  -9   8   54.79    5.50
  -2   9   8   66.29    6.30
   1  -9  -8   18.50    6.50
  -1  -9   8   18.20    3.90
   1  -9  -8   26.50    5.20
  -1   9   8   22.40    4.70
   0  -9  -8    1.00    2.70
   0  -9   8   -0.20    2.50
   0  -9  -8   -0.80    3.60
   0   9   8    6.80    4.10
   1  -9   8   -0.30    2.10
  -1  -9  -8    4.90    4.30
  -1  -9  -8   -1.50    3.10
  -1  -9  -8    6.80    6.50
   1   9   8   -3.00    3.40
   2  -9   8    1.20    2.30
  -2  -9  -8   -2.20    3.80
  -2  -9  -8   13.60    7.30
   2  -9   8    0.80    1.50
  -2   9  -8    2.30    1.80
   2   9   8    2.20    4.10
   2   9   8  -14.40    7.00
  -3  -9  -8   14.40    4.70
   3  -9   8    1.90    4.10
  -3  -9  -8   21.60    8.10
   3   9   8   27.30    9.70
  -3   9  -8    2.80    2.70
   3   9   8    8.20    4.40
   4  -9   8   62.79    8.40
  -4  -9  -8   65.99   12.70
  -4  -9  -8   46.40    7.40
  -4   9  -8   60.79    6.80
   4   9   8   66.69   11.80
   4   9   8   59.89    7.70
   5  -9   8   26.70    8.70
  -5  -9  -8    3.10   11.70
  -5  -9  -8    4.00    7.40
  -5   9  -8   14.60    5.90
   5   9   8   36.70   13.80
   5   9   8   19.40    6.30
  -6 -10   8    9.70    6.80
  -6 -10   8   -0.70    6.20
   6 -10  -8  -20.50    9.30
   6  10  -8    4.40    8.60
  -6  10   8   15.40    8.20
  -6  10   8   -8.10    6.90
  -5 -10   8    2.10    4.90
  -5 -10   8   12.70    5.80
  -5  10   8    2.10    5.00
   5  10  -8   -7.00    5.90
  -5  10   8    2.80    6.70
   4 -10  -8   19.80    5.90
  -4 -10   8   25.50    4.40
  -4 -10   8   14.20    5.00
  -4  10   8   19.60    6.20
  -4  10   8    5.70    5.60
   4  10  -8   12.50    4.90
   3 -10  -8    4.00    5.20
  -3 -10   8    7.40    2.20
  -3 -10   8   10.30    4.70
  -3  10   8   -1.80    4.60
   3  10  -8   10.60    3.30
  -3  10   8   12.20    5.50
  -2 -10   8  116.19    8.50
   2 -10  -8  113.19   12.60
   2 -10  -8  118.19    9.00
  -2  10   8  110.19    8.20
  -1 -10   8    2.70    3.10
   1 -10  -8    2.20    4.20
   1 -10  -8   -3.30    6.30
  -1  10   8    0.20    2.90
   0 -10  -8   10.70    6.60
   0 -10   8    2.40    2.80
   0 -10  -8    5.70    4.40
   0  10   8    5.10    3.40
  -1 -10  -8    5.10    6.90
  -1 -10  -8   -0.60    3.90
  -1 -10  -8    0.10    3.90
   1 -10   8    2.90    2.50
   1  10   8    5.10    4.00
   2 -10   8    3.10    2.30
  -2 -10  -8    6.80    4.80
   2 -10   8    0.90    1.90
  -2 -10  -8   10.70    7.60
   2  10   8   -5.10    7.30
  -2  10  -8    0.50    1.90
   2  10   8    2.80    3.40
   3 -10   8    4.40    4.30
  -3 -10  -8   -9.20    7.80
  -3 -10  -8    1.30    4.00
   3  10   8    4.20    9.60
   3  10   8    2.60    4.40
  -4 -10  -8    1.30    8.00
   4 -10   8    3.10    6.20
  -4 -10  -8   -6.40    4.90
   4  10   8   12.90    9.90
   4  10   8   -4.00    5.00
  -4  10  -8    6.20    4.10
  -6 -11   8    0.80    9.20
  -6  11   8    8.10    5.80
   5 -11  -8   -4.20    6.90
  -5 -11   8    7.10    7.70
  -5 -11   8    4.90    4.90
  -5  11   8    0.00    5.90
  -5  11   8   -5.50    4.80
   5  11  -8    1.90    6.50
  -4 -11   8  -10.60    4.90
  -4 -11   8    4.30    3.60
   4 -11  -8   -2.30    3.90
  -4  11   8    2.50    4.20
  -4  11   8   -0.70    5.80
   4  11  -8   -2.60    4.70
  -3 -11   8    1.50    2.30
   3 -11  -8   -3.20    5.10
  -3 -11   8    1.10    4.90
  -3  11   8    1.80    4.10
  -3  11   8    8.20    5.80
  -2 -11   8    0.00    3.90
   2 -11  -8    5.60    5.10
   2 -11  -8   13.30    8.30
  -2  11   8   -4.60    4.40
   1 -11  -8   68.69   10.10
   1 -11  -8   69.69    6.40
  -1 -11   8   66.69    6.40
  -1  11   8   77.79    8.40
   0 -11   8    0.40    3.10
   0 -11  -8   14.30    7.20
   0 -11  -8   -4.90    4.40
   0  11   8    1.10    4.50
   1 -11   8    1.10    2.90
  -1 -11  -8    6.10    8.20
  -1 -11  -8    0.60    3.70
  -1 -11  -8   -5.70    4.20
   1  11   8   -2.60    4.30
  -2 -11  -8   -1.60    6.10
   2 -11   8    7.40    2.40
   2 -11   8   -0.90    2.50
  -2 -11  -8    0.40    4.40
  -2  11  -8    2.20    1.90
   2  11   8    8.10    5.50
  -3 -11  -8   -0.50    9.00
  -3 -11  -8    0.40    4.70
   3 -11   8    8.50    5.00
   3  11   8    3.20    5.30
   3  11   8    2.90   11.20
  -4 -11  -8   -3.00    5.80
   4 -11   8   -3.90    6.20
  -4 -11  -8   -2.50   11.40
   4  11   8   -6.90    5.60
  -4  11  -8   10.00    4.40
   4  11   8   32.50   13.20
  -5 -12   8   -5.60    5.50
  -5 -12   8   -3.80    5.40
   5 -12  -8    1.70    6.50
  -5  12   8   -2.60    5.00
   5  12  -8   -3.70    7.00
  -5  12   8    6.90    7.90
  -4 -12   8    5.20    4.00
   4 -12  -8  -11.40    5.40
  -4 -12   8    2.00    6.30
  -4  12   8   12.60    7.10
  -4  12   8    2.50    5.00
   4  12  -8    5.20    5.50
  -3 -12   8    3.10    2.40
  -3 -12   8    3.70    5.40
   3 -12  -8    5.70    6.20
  -3  12   8   -2.00    5.60
  -3  12   8    8.80    6.00
   2 -12  -8    3.10    7.90
   2 -12  -8    7.30    4.30
  -2 -12   8   -0.50    4.60
  -2  12   8    0.30    3.80
   1 -12  -8   18.10    8.90
  -1 -12   8    8.80    4.60
   1 -12  -8   17.30    5.70
  -1  12   8   10.80    4.40
   0 -12  -8   11.20    6.10
   0 -12   8    9.20    3.90
   0 -12  -8   11.40    4.90
   0  12   8   11.70    5.50
  -1 -12  -8    0.70    3.80
   1 -12   8   -1.60    3.30
  -1 -12  -8   -9.10    8.20
  -1 -12  -8   -3.10    4.40
   1  12   8   -2.10    5.20
   2 -12   8    9.80    3.10
  -2 -12  -8    9.30    7.50
  -2 -12  -8   13.40    4.70
  -2 -12  -8    2.60    6.10
   2 -12   8   13.60    3.00
   2  12   8   11.90    6.40
  -3 -12  -8   24.70   10.50
  -3 -12  -8   44.70    7.50
   3 -12   8   34.20    5.70
   3  12   8   16.50   12.90
   3  12   8   40.90    7.90
  -4 -12  -8   20.50   12.70
  -4 -12  -8    5.50    6.30
   4 -12   8    4.70    6.90
   4  12   8    4.90    6.50
   4  12   8   21.70   15.80
  -4  12  -8   -3.40    4.10
  -5 -13   8  -18.90    8.40
   5 -13  -8  -20.20    9.40
  -5 -13   8   -3.50    5.70
  -5  13   8   -0.10    8.30
   5  13  -8   18.60    8.30
  -5  13   8   -5.10    8.10
  -4 -13   8  -14.50    6.60
  -4 -13   8    4.90    4.30
   4 -13  -8   17.80    7.40
   4  13  -8   -5.30    5.60
  -4  13   8   -3.70    7.70
  -4  13   8    2.00    7.20
  -3 -13   8    3.20    5.70
   3 -13  -8   11.70    6.90
  -3 -13   8    1.20    2.20
  -3 -13   8    0.80    2.70
  -3  13   8   -2.30    6.10
  -2 -13   8    4.00    5.20
   2 -13  -8    3.60    4.90
   2 -13  -8    0.20    6.60
  -2  13   8   15.60    6.40
   1 -13  -8   55.29   10.40
   1 -13  -8   57.39    8.20
  -1 -13   8   65.09    7.80
  -1  13   8   43.70    8.00
   0 -13  -8   21.80    9.20
   0 -13   8   12.30    4.40
   0 -13  -8   14.50    6.80
   0  13   8   19.00    5.80
  -1 -13  -8   -2.70    4.60
  -1 -13  -8   11.80    9.70
  -1 -13  -8    6.30    5.90
   1 -13   8   -1.60    3.70
   1  13   8    2.30    4.30
  -2 -13  -8  -14.10    7.20
  -2 -13  -8   -2.00    4.60
   2 -13   8   -0.90    2.90
   2 -13   8    0.30    3.20
   2  13   8   -5.30    4.40
  -3 -13  -8    7.80    6.60
  -3 -13  -8  -14.30    9.70
   3 -13   8    3.00    4.60
  -3  13  -8   10.50    3.70
   3  13   8    9.90    6.40
   3  13   8   21.10   14.40
   4 -14  -8   -1.80    8.10
  -4 -14   8    3.90    4.60
  -4 -14   8    2.60    5.80
  -4  14   8   -7.20    7.40
  -4  14   8   -1.00    8.40
   3 -14  -8   -5.10    7.60
  -3 -14   8    1.00    2.40
   3 -14  -8  -12.10   10.60
  -3 -14   8   -0.10    2.90
  -3 -14   8    2.70    4.80
  -3  14   8   -4.10    5.20
   2 -14  -8   18.00    8.40
  -2 -14   8    5.90    5.00
   2 -14  -8    4.90    6.70
  -2  14   8   12.30    5.40
   1 -14  -8   31.80   11.10
  -1 -14   8   25.80    5.80
   1 -14  -8   38.80    7.70
  -1  14   8   18.30    7.20
   0 -14  -8   16.20    9.10
   0 -14   8    2.90    4.70
   0 -14  -8    4.60    6.40
   0  14   8    3.80    6.20
  -1 -14  -8   -6.90    6.60
  -1 -14  -8   -1.20    5.70
  -1 -14  -8   11.00    8.50
   1 -14   8    0.70    4.00
   1  14   8    0.10    4.70
  -2 -14  -8    9.50    6.90
  -2 -14  -8   10.50    9.40
   2 -14   8   10.80    3.80
   2 -14   8    6.50    3.30
   2 -14   8   10.50    3.90
  -2 -14  -8    0.20    8.10
   2  14   8    3.30    6.60
   3 -14   8   -9.70    4.70
  -3 -14  -8   10.40    9.60
  -3 -14  -8   -5.90    7.40
   3  14   8    1.10    8.20
  -3 -15   8    0.20    2.50
   3 -15  -8  -15.40    7.90
  -3 -15   8    3.20    8.30
   3 -15  -8   12.70   12.50
  -3 -15   8   -3.20    3.20
  -3  15   8  -18.10    7.70
   2 -15  -8    0.90   11.40
   2 -15  -8    9.30    8.20
  -2 -15   8   11.90    6.90
  -2  15   8  -14.80    6.90
   1 -15  -8   -8.20    6.90
  -1 -15   8   -2.60    5.40
   1 -15  -8    2.10   10.90
  -1  15   8    2.30    4.60
   0 -15   8   31.40    6.70
   0 -15  -8   51.49   12.70
   0 -15  -8   50.69    8.40
   0  15   8   34.10    8.50
   1 -15   8   -1.30    4.90
  -1 -15  -8   -7.10    7.40
  -1 -15  -8    1.20    7.00
  -1 -15  -8   21.80   11.90
   1  15   8   -3.10    5.60
  -2 -15  -8  -10.50    7.30
  -2 -15  -8  -29.20   11.10
   2 -15   8   -0.50    3.40
   2 -15   8    0.60    3.80
   2 -15   8    0.40    4.30
  -2 -15  -8   -3.00    8.70
   2  15   8    1.30    7.00
  -2 -16   8   12.10    7.60
   2 -16  -8   18.70   13.80
   2 -16  -8   -3.30    6.50
  -2  16   8    2.30    8.30
   1 -16  -8   -4.60    7.30
   1 -16  -8    5.30    9.50
  -1 -16   8   10.00    6.60
  -1  16   8   17.90    6.30
   0 -16  -8    5.20    8.60
   0 -16  -8    3.20   12.00
   0 -16   8   11.80    6.60
   0  16   8    8.00    7.60
  -1 -16  -8   -0.50    7.70
   1 -16   8   10.00    5.90
  -1 -16  -8   47.00   14.50
  -1 -16  -8   -3.10    8.70
   1  16   8    8.30    8.60
  -7   0   9   14.80    5.70
   7   0  -9   16.10    9.50
   6   0  -9    1.20    5.70
  -6   0   9   -8.20    4.60
   5   0  -9   19.00    5.50
  -5   0   9   17.80    4.80
  -4   0   9    5.20    3.00
   4   0  -9    0.70    3.20
  -3   0   9    8.50    2.90
   3   0  -9   11.20    3.30
   2   0  -9    0.60    2.00
  -2   0   9    0.30    1.80
   1   0  -9   10.60    2.50
   1   0  -9   12.40    3.10
   0   0  -9    2.40    2.40
   0   0  -9    0.70    1.90
   1   0   9   20.90    2.60
  -1   0  -9   23.40    4.20
   1   0   9   23.60    5.00
   2   0   9    2.40    1.50
  -2   0  -9    7.10    3.70
   2   0   9   -3.50    3.50
   3   0   9   55.09    2.80
   3   0   9   46.70    8.00
  -3   0  -9   84.79    8.70
  -4   0  -9   -4.10    5.10
   4   0   9   -1.70    7.10
  -5   0  -9    2.80    6.40
   5   0   9  -12.10    7.30
   7  -1  -9   27.20    8.70
  -7  -1   9    3.10    5.90
   7   1  -9   22.50    8.90
  -7   1   9   22.80    6.80
  -6  -1   9   41.30    7.10
   6  -1  -9   32.00    7.70
  -6   1   9   40.00    6.80
   6   1  -9   45.30    8.30
  -5  -1   9   35.20    6.00
   5  -1  -9   33.50    6.50
  -5   1   9   27.90    5.70
   5   1  -9   38.80    6.40
   4  -1  -9   17.00    4.20
  -4  -1   9   17.90    3.90
   4   1  -9   20.70    4.70
  -4   1   9   17.80    3.80
  -3  -1   9    1.70    2.00
   3  -1  -9   -0.90    2.40
  -3   1   9   -1.40    2.40
   3   1  -9    0.60    2.60
   2  -1  -9    2.00    2.40
  -2  -1   9    2.70    1.90
   2   1  -9    4.00    2.00
  -2   1   9   -0.10    2.10
   1  -1  -9   77.79    4.70
   1  -1  -9   82.49    6.00
   1   1  -9   80.29    5.20
   1   1  -9   77.69    4.30
   0  -1  -9    0.20    2.00
   0  -1  -9    1.70    3.00
   0   1  -9   -0.90    2.30
   0   1  -9    2.80    1.80
   0   1   9    0.90    1.80
   1  -1   9   27.30    2.80
   1  -1   9   28.10    4.60
  -1  -1  -9   27.80    4.90
   1   1   9   26.80    3.40
  -1   1  -9   25.80    3.90
   1   1   9   22.90    5.10
   2  -1   9    4.70    3.90
  -2  -1  -9   19.00    4.90
   2  -1   9    9.00    1.70
   2   1   9    9.80    4.80
   2   1   9   11.00    2.20
  -2   1  -9   11.20    3.90
   3  -1   9  220.08   12.60
  -3  -1  -9  218.18   12.50
   3   1   9  250.27   13.60
  -3   1  -9  241.78   11.60
   3   1   9  228.68    7.10
   4  -1   9   -3.70    6.60
  -4  -1  -9   -6.80    5.30
   4   1   9   -8.70    6.70
  -4   1  -9    1.30    5.10
  -5  -1  -9   34.50    9.00
   5  -1   9   23.50    8.40
   5   1   9   31.80    9.70
  -5   1  -9   31.50    7.00
   7  -2  -9   23.90    8.40
  -7  -2   9   14.30    7.10
   7   2  -9   10.80    8.90
  -7   2   9   23.20    6.60
  -6  -2   9   14.20    5.40
   6  -2  -9   16.70    7.50
   6   2  -9    8.00    6.60
  -6   2   9    6.20    4.50
   5  -2  -9   32.90    6.40
  -5  -2   9   30.50    5.40
   5   2  -9   34.10    5.70
  -5   2   9   30.90    5.40
   4  -2  -9  197.88   10.20
  -4  -2   9  212.38    9.10
   4   2  -9  185.28    9.50
  -4   2   9  206.38    9.70
  -3  -2   9   -1.10    1.90
   3  -2  -9   -0.70    2.80
   3   2  -9    1.70    2.70
  -3   2   9    4.40    2.90
  -2  -2   9   33.80    3.20
   2  -2  -9   35.10    4.10
   2   2  -9   28.20    3.40
  -2   2   9   35.20    4.20
   1  -2  -9   42.60    4.20
   1  -2  -9   41.20    5.50
   1   2  -9   37.80    3.90
   1   2  -9   39.10    3.10
   0  -2  -9  114.39    7.60
   0  -2  -9  109.59    6.20
   0   2  -9  110.79    4.80
   0   2  -9  103.79    5.50
   0   2   9  109.69    5.90
   1  -2   9  107.19    4.40
   1  -2   9  109.49    6.80
  -1  -2  -9  106.39    7.70
   1   2   9  105.39    5.60
   1   2   9  106.89    8.40
  -1   2  -9  108.79    6.00
  -2  -2  -9  124.49    8.90
   2  -2   9  118.09    3.80
   2  -2   9  118.89    8.20
   2   2   9  123.69    5.70
  -2   2  -9  133.19    7.60
   2   2   9  131.59   10.10
   3  -2   9    9.50    5.20
  -3  -2  -9    8.80    5.70
   3   2   9    1.40    4.60
  -3   2  -9    4.60    4.00
   3   2   9    6.70    2.20
   4  -2   9    5.00    6.50
  -4  -2  -9   11.00    7.20
   4   2   9    1.30    7.90
  -5  -2  -9    8.50    7.30
   5  -2   9   -9.70    7.60
   5   2   9   -2.50    8.70
  -5   2  -9   -3.20    6.70
   7  -3  -9  -17.20    8.50
  -7  -3   9    0.30    6.60
  -7   3   9   -4.40    6.00
   7   3  -9   -3.90    9.20
  -6  -3   9   -3.80    4.70
   6  -3  -9   -2.80    5.00
   6   3  -9   -3.40    6.00
  -6   3   9   -3.90    5.30
   5  -3  -9   59.19    7.80
  -5  -3   9   52.29    6.50
  -5   3   9   52.79    6.80
   5   3  -9   51.99    7.30
  -4  -3   9   15.10    3.80
   4  -3  -9   13.30    4.30
  -4   3   9   16.00    3.60
   4   3  -9   17.30    3.80
  -3  -3   9   47.50    3.90
   3  -3  -9   44.80    4.90
   3   3  -9   48.00    5.00
  -3   3   9   40.50    5.20
   2  -3  -9   33.90    4.60
  -2  -3   9   34.70    3.00
   2   3  -9   26.60    3.20
  -2   3   9   38.70    4.40
   1  -3  -9   46.60    5.90
   1  -3  -9   48.10    4.60
   1   3  -9   42.70    2.70
   0  -3  -9   10.30    3.80
   0  -3  -9    9.30    2.80
   0   3  -9    9.40    1.70
   0   3   9   10.20    2.70
  -1  -3  -9   30.50    5.80
   1  -3   9   21.20    4.00
  -1   3  -9   28.70    3.60
   1   3   9   26.30    3.50
   1   3   9   27.10    5.90
  -2  -3  -9  228.38   12.00
   2  -3   9  207.68    4.70
   2  -3   9  209.88   10.00
   2  -3   9  204.38    4.70
  -2   3  -9  220.68    9.10
   2   3   9  223.78    8.30
   2   3   9  229.08   13.20
   3  -3   9  198.78   11.30
  -3  -3  -9  230.18   13.50
  -3   3  -9  222.88   10.30
   3   3   9  224.48    8.40
   3   3   9  190.78   13.10
  -4  -3  -9   48.40    8.30
   4  -3   9   34.90    7.30
  -4   3  -9   33.60    6.60
   4   3   9   42.80    4.70
   4   3   9   48.40    9.60
  -5  -3  -9    5.70    8.70
   5  -3   9   11.00    8.10
  -5   3  -9   13.20    7.40
   5   3   9   12.60    9.90
  -7  -4   9   -6.20    5.80
   7  -4  -9  -10.90    9.60
  -7   4   9   -4.70    6.90
   7   4  -9   14.70    9.80
  -6  -4   9   -5.80    4.60
   6  -4  -9    5.30    6.90
  -6   4   9    0.70    5.60
   6   4  -9    2.30    6.50
   5  -4  -9   16.80    5.70
  -5  -4   9   10.70    4.50
  -5   4   9   14.00    5.20
   5   4  -9    6.00    5.40
   4  -4  -9    6.80    4.00
  -4  -4   9    8.60    3.30
   4   4  -9    8.80    3.80
  -4   4   9   11.60    4.50
   3  -4  -9  193.88    9.40
  -3  -4   9  193.78    7.20
  -3   4   9  205.68    9.60
   3   4  -9  218.58    8.30
   2  -4  -9    6.80    3.30
  -2  -4   9    8.00    1.80
   2   4  -9    7.20    2.10
  -2   4   9   11.20    3.30
   1  -4  -9   24.80    3.80
   1  -4  -9   30.50    5.80
   1   4  -9   27.90    2.10
  -1   4   9   26.30    3.70
   1   4  -9   24.80    2.30
   0  -4  -9   10.10    4.10
   0  -4  -9    2.60    2.20
   0   4  -9    5.30    1.30
   0   4  -9    3.20    1.50
   0   4   9    2.40    2.50
  -1  -4  -9   65.29    8.00
   1  -4   9   56.19    4.70
   1   4   9   50.09    7.80
   1   4   9   57.99    5.30
   2  -4   9   -1.10    3.30
  -2  -4  -9    6.50    5.30
   2   4   9    5.50    2.70
  -2   4  -9    3.10    2.30
   2   4   9    5.70    5.90
   3  -4   9   18.40    5.20
  -3  -4  -9   31.10    7.90
  -3   4  -9   17.10    4.40
   3   4   9   25.60    3.70
   3   4   9   21.50    7.40
   4  -4   9    8.30    6.20
  -4  -4  -9   21.40    8.00
   4   4   9    6.30    3.10
  -4   4  -9   -0.30    4.80
   4   4   9  -12.90    7.30
  -5  -4  -9    5.80    9.50
   5  -4   9    1.20    8.00
   5   4   9   -7.80   10.20
  -5   4  -9   -3.70    6.50
  -7  -5   9   10.60    6.10
  -7  -5   9   -0.70    9.00
   7  -5  -9   -9.30    9.50
   7   5  -9   19.30   10.00
  -7   5   9    6.10    7.60
  -6  -5   9    2.30    4.60
   6  -5  -9    7.70    7.40
  -6   5   9   15.40    6.60
   6   5  -9    2.40    7.10
  -5  -5   9   17.10    4.50
   5  -5  -9   10.00    6.00
   5   5  -9   15.50    5.70
  -5   5   9   17.40    6.00
  -4  -5   9    5.20    3.00
   4  -5  -9    6.30    3.40
   4   5  -9    4.30    3.70
  -4   5   9   10.30    4.70
  -3  -5   9   55.29    4.00
   3  -5  -9   52.69    6.20
  -3   5   9   47.70    5.90
   3   5  -9   50.99    5.00
   2  -5  -9    8.40    3.30
  -2  -5   9    6.20    1.50
  -2   5   9    5.30    3.20
   2   5  -9    7.90    1.90
  -2   5   9   10.80    3.40
   1  -5  -9   13.70    4.90
   1  -5  -9    8.20    3.30
  -1   5   9    9.80    3.20
   0  -5  -9    9.50    3.40
   0  -5  -9    8.80    4.50
   0   5   9   11.80    3.30
   1  -5   9   -4.00    1.40
  -1  -5  -9   -4.90    4.50
   1  -5   9    4.00    2.10
  -1   5  -9    2.70    1.70
   1   5   9    2.70    2.60
   2  -5   9    6.30    3.70
  -2  -5  -9    4.90    5.50
   2   5   9    8.60    3.00
   2   5   9   14.50    6.40
  -2   5  -9   10.80    2.90
   3  -5   9   70.29    7.90
  -3  -5  -9   90.29   11.30
   3   5   9   69.99   10.00
   3   5   9   82.49    6.30
  -3   5  -9   73.79    6.40
  -4  -5  -9    9.40    8.60
   4  -5   9   13.70    6.60
  -4  -5  -9   15.80    4.10
   4   5   9   -9.40    7.60
   4   5   9   15.20    4.40
  -4   5  -9    8.20    4.90
  -5  -5  -9    1.30    4.70
  -5  -5  -9    2.90    9.80
   5  -5   9   17.40    7.90
  -5   5  -9   10.50    6.70
   5   5   9  -10.10    9.70
  -7  -6   9   10.30    9.30
   7  -6  -9   -8.10   10.20
  -7  -6   9  -11.00    6.20
  -7   6   9    0.80    8.00
   7   6  -9  -10.10    9.40
  -6  -6   9   11.40    4.90
  -6  -6   9   19.10    6.20
   6  -6  -9   17.50    8.40
   6   6  -9    9.60    7.10
  -6   6   9   -6.10    6.10
  -5  -6   9   12.90    4.10
   5  -6  -9   13.50    6.10
  -5  -6   9    8.70    4.40
   5   6  -9    4.10    5.40
  -5   6   9   17.00    6.00
   4  -6  -9    1.50    3.90
  -4  -6   9   -3.80    2.60
  -4   6   9    3.10    4.50
   4   6  -9   -4.50    3.50
  -3  -6   9   70.59    4.10
   3  -6  -9   68.39    6.20
  -3   6   9   66.19    6.90
   3   6  -9   62.99    5.10
   2  -6  -9   88.09    7.00
  -2   6   9   68.99    5.70
   2   6  -9   74.59    2.50
  -2   6   9   79.09    6.70
   2   6  -9   75.79    2.50
   1  -6  -9   -0.80    3.20
   1  -6  -9   -0.50    3.40
  -1  -6   9   -4.50    2.50
  -1   6   9   -2.70    1.80
   0  -6   9   -2.30    2.00
   0  -6  -9   -0.10    3.30
   0  -6  -9    1.50    3.20
   0   6   9   -1.60    2.70
  -1  -6  -9   89.49    7.00
   1  -6   9   94.29    4.30
   1  -6   9   84.69    4.40
  -1  -6  -9   80.99    8.30
  -1   6  -9   91.79    3.20
   1   6   9   87.19    6.60
  -2  -6  -9   70.29    9.30
   2  -6   9   41.90    5.40
   2   6   9   66.79    6.40
   2   6   9   90.29   11.50
   3  -6   9   20.30    5.10
  -3  -6  -9   40.70    8.50
  -3  -6  -9   20.60    4.30
   3   6   9   19.10    4.40
  -3   6  -9   20.90    4.00
   3   6   9   24.30    8.70
  -4  -6  -9    2.40    4.00
   4  -6   9   10.80    6.20
  -4  -6  -9   -0.60    8.40
   4   6   9    5.70    4.40
  -4   6  -9    1.10    4.80
   4   6   9    1.60    8.00
  -5  -6  -9   10.40    5.30
  -5  -6  -9    9.70   10.60
   5  -6   9   15.90    8.60
   5   6   9   -7.00   11.90
  -5   6  -9    8.00    7.10
   5   6   9    1.10    4.50
   6  -7  -9    2.00    7.60
  -6  -7   9    3.70    7.90
  -6  -7   9    2.40    5.10
   6   7  -9   -2.50    7.40
  -6   7   9   -1.50    6.70
   5  -7  -9    5.90    4.90
  -5  -7   9   -3.70    3.40
  -5  -7   9   -4.60    4.10
   5   7  -9    3.10    5.40
  -5   7   9    1.60    5.80
  -4  -7   9   -6.30    2.40
   4  -7  -9    5.60    4.60
  -4  -7   9   -7.90    4.70
  -4   7   9    7.60    5.20
  -4   7   9    3.30    3.60
   4   7  -9   -1.40    3.60
  -3  -7   9   34.60    3.20
  -3  -7   9   32.00    5.80
   3  -7  -9   38.20    5.80
  -3   7   9   37.70    5.40
   3   7  -9   34.90    4.20
  -3   7   9   30.60    5.50
   2  -7  -9  138.99    8.10
  -2  -7   9  140.39    8.20
   2  -7  -9  128.79    9.90
  -2   7   9  134.79    8.50
   1  -7  -9    7.30    5.40
   1  -7  -9    5.70    3.70
  -1  -7   9    6.30    3.10
  -1   7   9    1.40    2.80
   0  -7   9   -2.10    2.20
   0  -7  -9   -2.40    3.00
   0  -7  -9    4.40    4.00
   0   7   9   -2.50    3.20
  -1  -7  -9    6.00    3.10
  -1  -7  -9    2.70    5.70
   1  -7   9   -0.10    1.80
   1   7   9   -2.40    3.40
  -2  -7  -9   28.10    7.60
   2  -7   9   30.60    4.30
   2   7   9   24.10    4.90
  -2   7  -9   25.10    3.10
   2   7   9   30.00    9.00
  -3  -7  -9   30.80    8.30
   3  -7   9   29.50    5.50
  -3  -7  -9   29.80    4.70
  -3   7  -9   40.00    4.90
   3   7   9   30.40    5.10
   3   7   9   48.70   11.00
   4  -7   9   14.10    5.90
  -4  -7  -9   15.20    4.90
  -4  -7  -9   25.20    9.80
   4   7   9   14.70    4.50
  -4   7  -9   13.30    4.50
   4   7   9   14.00    7.80
  -5  -7  -9    3.80    6.00
   5  -7   9    6.20    8.40
  -5  -7  -9   18.30   11.90
   5   7   9   -8.60   12.40
  -5   7  -9   -0.30    5.90
   5   7   9   -3.20    5.30
  -6  -8   9   -4.10    5.50
  -6  -8   9  -16.60    7.10
   6  -8  -9    4.70    6.60
   6   8  -9   13.40    7.70
  -6   8   9   -4.80    6.30
  -5  -8   9   11.10    4.00
  -5  -8   9    6.80    6.40
   5  -8  -9   10.00    6.50
  -5   8   9   12.50    6.30
   5   8  -9   19.30    5.70
  -5   8   9   10.90    6.10
   4  -8  -9   -0.20    4.70
  -4  -8   9    3.40    2.80
  -4  -8   9    6.10    5.10
  -4   8   9    6.70    4.60
  -4   8   9    7.10    5.30
   4   8  -9    0.00    3.80
  -3  -8   9   43.80    6.60
  -3  -8   9   37.00    3.10
   3  -8  -9   35.60    5.90
   3   8  -9   40.00    4.20
  -3   8   9   45.10    6.60
  -3   8   9   28.00    5.30
  -2  -8   9   25.30    4.50
   2  -8  -9   22.40    5.20
   2  -8  -9   23.90    7.40
  -2   8   9   19.00    4.90
   1  -8  -9   -4.40    3.60
  -1  -8   9    0.80    3.10
   1  -8  -9   -5.80    5.70
  -1   8   9   -0.70    3.60
   0  -8  -9   14.10    5.00
   0  -8  -9    9.60    4.10
   0  -8   9    8.40    3.20
   0   8   9   11.60    3.60
  -1  -8  -9   29.30    7.50
  -1  -8  -9   33.90    5.60
   1  -8   9   22.00    3.10
   1   8   9   18.90    4.80
   2  -8   9    7.40    1.10
   2  -8   9   12.60    3.10
  -2  -8  -9   14.00    4.40
  -2  -8  -9    2.70    6.90
  -2   8  -9    8.00    2.30
   2   8   9    1.40    7.90
   2   8   9   12.10    4.50
  -3  -8  -9    1.80    5.50
  -3  -8  -9    5.10    4.40
   3  -8   9    5.40    4.40
   3   8   9   27.80    8.70
   3   8   9    5.70    3.90
   4  -8   9    0.60    5.90
  -4  -8  -9    4.50    9.00
  -4  -8  -9    1.40    5.20
   4   8   9    3.60    5.00
   4   8   9    2.30    8.50
  -4   8  -9   -0.60    3.80
  -5  -8  -9    8.90    6.80
   5  -8   9   -2.70    8.70
  -5  -8  -9    4.20    9.40
   5   8   9   17.70   14.40
   5   8   9   -2.40    6.00
  -5   8  -9   13.00    6.30
   6  -9  -9    3.00    9.50
  -6  -9   9   -1.00    6.00
  -6  -9   9   12.30    6.60
  -6   9   9   -4.80    6.00
   6   9  -9  -13.20    7.60
  -6   9   9   12.40    7.60
   5  -9  -9    4.30    7.40
  -5  -9   9   -1.60    6.90
  -5  -9   9   -5.00    3.90
   5   9  -9   -6.90    5.20
  -5   9   9    1.60    5.00
  -5   9   9    3.50    6.00
   4  -9  -9    1.90    5.10
  -4  -9   9  -13.50    4.90
  -4  -9   9   -1.40    2.50
  -4   9   9    2.80    5.50
  -4   9   9   -1.00    5.50
   4   9  -9    4.10    4.10
  -3  -9   9    6.30    3.40
  -3  -9   9    7.30    1.80
   3  -9  -9    2.30    5.20
  -3   9   9   14.70    5.10
   3   9  -9    8.60    2.50
  -3   9   9    7.20    4.20
   2  -9  -9   97.69   11.50
   2  -9  -9  114.39    8.90
  -2  -9   9   82.69    7.80
  -2   9   9   81.69    7.40
   1  -9  -9   30.70    5.50
  -1  -9   9   30.40    4.80
   1  -9  -9   31.40    7.10
  -1   9   9   28.60    5.60
   0  -9  -9    3.60    4.30
   0  -9  -9    7.90    4.70
   0  -9   9    7.20    3.10
   0   9   9   12.00    4.50
  -1  -9  -9   -1.60    5.30
   1  -9   9    4.20    2.40
  -1  -9  -9    2.80    4.60
   1   9   9   -0.60    3.60
   2  -9   9    1.60    1.30
  -2  -9  -9    5.90    3.60
   2  -9   9    5.50    2.80
  -2  -9  -9    1.20    5.60
   2   9   9   -1.80    4.10
  -2   9  -9    1.50    1.70
   2   9   9   13.50    9.10
  -3  -9  -9   15.80    9.40
   3  -9   9   31.60    5.70
  -3  -9  -9   16.70    5.60
   3   9   9   25.80   10.90
   3   9   9   23.70    5.50
   4  -9   9    4.30    6.10
  -4  -9  -9   -2.40    5.10
  -4  -9  -9  -16.90   11.00
   4   9   9    1.00    5.50
  -4   9  -9    5.80    4.30
   4   9   9  -12.70    9.20
  -6 -10   9   12.00    6.10
  -6 -10   9    9.30    9.80
   6 -10  -9    4.00    8.00
  -6  10   9    8.50    8.40
   6  10  -9  -14.10    8.50
  -6  10   9    2.30    6.60
   5 -10  -9    3.50    6.10
  -5 -10   9    1.80    7.40
  -5 -10   9    4.10    4.40
  -5  10   9    4.50    5.40
  -5  10   9    0.30    5.70
   5  10  -9   -0.70    6.40
   4 -10  -9    2.80    5.10
  -4 -10   9   -5.30    2.80
  -4 -10   9    5.10    5.60
  -4  10   9    2.80    6.00
  -4  10   9   -4.10    5.30
   4  10  -9    1.10    4.50
   3 -10  -9   43.60    7.60
  -3 -10   9   42.50    6.20
  -3 -10   9   37.20    3.00
  -3  10   9   42.80    6.70
  -3  10   9   41.40    6.90
   2 -10  -9   18.60    6.90
  -2 -10   9   14.20    4.40
   2 -10  -9   15.40    5.50
  -2  10   9   12.50    5.40
  -1 -10   9   33.40    5.30
   1 -10  -9   30.20    5.90
   1 -10  -9   47.40    9.50
  -1  10   9   29.20    5.30
   0 -10  -9   18.00    6.10
   0 -10  -9   20.00    5.00
   0 -10   9   18.70    3.90
   0  10   9   26.80    5.90
  -1 -10  -9   -4.50    5.50
  -1 -10  -9   -2.40    3.60
   1 -10   9   -1.30    2.50
   1  10   9    2.70    4.00
   2 -10   9    6.20    1.90
  -2 -10  -9   -6.50    4.10
  -2 -10  -9    7.80    9.30
   2 -10   9    2.30    2.50
   2  10   9   -4.00    4.70
  -2  10  -9    6.30    1.70
   3 -10   9    6.20    4.30
  -3 -10  -9    9.40    5.90
  -3 -10  -9    7.80    7.50
   3  10   9    8.30    5.60
   3  10   9   23.60   11.90
  -3  10  -9   -1.40    3.10
   4 -10   9  -13.20    6.10
  -4 -10  -9   -5.40    6.10
  -4 -10  -9  -11.00    8.50
   4  10   9    3.70   12.00
   4  10   9    0.90    5.90
  -4  10  -9   -6.30    4.00
  -5 -11   9    7.20    4.80
  -5 -11   9   14.80    6.00
   5 -11  -9   10.50    8.10
  -5  11   9    9.90    7.20
  -5  11   9   22.60    7.70
   5  11  -9   -8.30    6.60
  -4 -11   9   -1.10    6.00
   4 -11  -9    5.40    6.30
  -4 -11   9    2.90    3.00
   4  11  -9   10.60    4.50
  -4  11   9    9.30    6.70
  -4  11   9   -1.00    4.50
   3 -11  -9   -2.00    5.00
  -3 -11   9    3.70    4.30
  -3 -11   9    1.40    1.40
  -3  11   9   -0.10    5.10
  -3  11   9    8.40    4.70
   2 -11  -9    7.10    8.50
   2 -11  -9    2.40    5.50
  -2 -11   9   -4.00    4.40
  -2  11   9    0.30    4.80
   1 -11  -9  107.49    8.20
  -1 -11   9  139.59    8.60
   1 -11  -9  121.99   11.90
  -1  11   9  127.19   10.20
   0 -11   9   -6.40    3.70
   0 -11  -9    1.20    7.40
   0  11   9   -3.20    3.70
   1 -11   9   -4.90    3.00
  -1 -11  -9   -6.30    5.90
  -1 -11  -9    2.60    5.50
   1  11   9   -0.80    4.60
   2 -11   9    1.90    2.10
   2 -11   9    2.50    2.40
  -2 -11  -9    7.30    6.20
  -2 -11  -9    1.80    4.90
  -2 -11  -9   15.80   10.10
   2  11   9    2.50    5.50
  -3 -11  -9   24.00    6.80
   3 -11   9   27.40    4.90
  -3 -11  -9   23.90   11.30
   3  11   9   29.80    6.80
  -3  11  -9   21.70    3.90
   3  11   9   31.60   13.80
  -4 -11  -9    0.70    6.90
  -4 -11  -9    8.30   12.40
   4 -11   9    3.20    6.40
   4  11   9   26.60   14.20
  -4  11  -9    9.40    4.70
   4  11   9    1.40    6.90
   5 -12  -9  -15.30    8.70
  -5 -12   9   -5.90    8.90
  -5 -12   9    5.30    5.00
   5  12  -9    6.90    7.10
  -5  12   9   -6.90    7.70
  -5  12   9   -3.10    8.20
   4 -12  -9   19.20    7.20
  -4 -12   9   23.50    6.50
  -4 -12   9   19.70    4.10
   4  12  -9   17.40    5.60
  -4  12   9   17.00    7.90
  -4  12   9   24.80    8.10
  -3 -12   9   -9.10    4.90
  -3 -12   9    0.60    1.30
  -3 -12   9   -1.60    1.20
   3 -12  -9   -0.60    4.70
  -3  12   9   -1.60    6.10
   2 -12  -9   -9.00    8.90
   2 -12  -9   -6.30    5.20
  -2 -12   9    1.70    4.80
  -2  12   9   -1.60    4.30
   1 -12  -9   42.30   10.70
   1 -12  -9   39.20    6.90
  -1  12   9   27.20    6.60
   0 -12   9    8.80    4.20
   0 -12  -9   -9.40    8.10
   0 -12  -9    8.50    5.80
   0  12   9   -0.90    4.20
   1 -12   9   -0.90    3.40
  -1 -12  -9   -1.20    4.00
  -1 -12  -9   -5.20    6.40
  -1 -12  -9   -0.80    6.20
   1  12   9    2.60    5.20
  -2 -12  -9   25.50   11.10
   2 -12   9    2.50    2.20
   2 -12   9    0.00    2.70
  -2 -12  -9   -2.20    4.80
  -2 -12  -9    3.40    6.40
   2  12   9  -11.30    4.20
   3 -12   9    7.90    4.20
  -3 -12  -9   -1.10   11.50
  -3 -12  -9    5.40    7.00
  -3  12  -9    2.80    3.10
   3  12   9  -13.50    6.40
   3  12   9   10.80   13.80
   4 -13  -9    5.70    7.50
  -4 -13   9    4.30    3.30
  -4 -13   9   -8.10    7.90
  -4  13   9    7.20    7.70
  -4  13   9  -11.00    7.50
  -3 -13   9   -1.80    6.10
  -3 -13   9    1.40    1.00
  -3 -13   9    3.60    1.10
   3 -13  -9   -7.70   10.90
   3 -13  -9    6.40    7.30
  -3  13   9   -1.00    5.20
  -2 -13   9    0.10    5.20
   2 -13  -9    7.70    5.40
   2 -13  -9   -1.10    7.60
  -2  13   9   -1.70    6.30
  -1 -13   9   21.60    6.30
   1 -13  -9   25.70    7.10
   1 -13  -9   20.60    7.80
  -1  13   9   13.80    5.10
   0 -13   9    1.70    4.20
   0 -13  -9    9.50    5.60
   0 -13  -9    0.10    6.60
   0  13   9    6.40    5.70
  -1 -13  -9    0.30    6.30
  -1 -13  -9   -5.90    4.40
   1 -13   9    2.80    3.90
  -1 -13  -9   15.30    9.90
   1  13   9    8.60    6.30
  -2 -13  -9    3.30    4.70
  -2 -13  -9    4.60    6.20
  -2 -13  -9   12.20   11.40
   2 -13   9    3.40    2.00
   2 -13   9    7.90    3.20
   2 -13   9    1.50    2.00
   2  13   9    3.00    7.10
   3 -13   9   -0.60    4.30
  -3 -13  -9    9.10   12.70
  -3 -13  -9    4.40    7.70
  -3  13  -9    0.70    3.10
   3  13   9  -11.40    7.30
   4 -14  -9   -0.90    8.40
  -4 -14   9   13.50    8.60
  -4 -14   9    2.30    3.70
  -4  14   9   -1.60    6.10
   3 -14  -9    2.10   12.40
   3 -14  -9    8.40    8.60
  -3 -14   9   -6.80    7.10
  -3  14   9   -9.70    7.80
  -2 -14   9   -0.60    6.50
   2 -14  -9   -7.40    7.40
  -2  14   9   -5.10    6.90
   1 -14  -9    5.50    7.10
   1 -14  -9  -10.90   10.10
  -1 -14   9   16.80    5.70
  -1  14   9    3.30    7.10
   0 -14   9   12.50    4.80
   0 -14  -9    8.00    8.00
   0 -14  -9   15.20   11.80
   0  14   9   17.50    6.90
   1 -14   9   -2.60    4.60
  -1 -14  -9   26.50   12.50
  -1 -14  -9   -3.50    5.20
  -1 -14  -9   -3.20    5.40
   1  14   9    2.10    7.60
  -2 -14  -9   -2.30    6.30
  -2 -14  -9   -2.90    5.10
   2 -14   9    1.00    3.50
  -2 -14  -9   13.50   12.80
   2  14   9    3.90    7.50
   3 -15  -9   10.30    9.50
   3 -15  -9   -9.60   13.30
  -3 -15   9  -10.80    7.60
  -3  15   9  -12.00    6.10
  -2 -15   9   -4.80    6.60
   2 -15  -9    1.20    9.00
   2 -15  -9  -24.40   12.10
  -2  15   9   -8.30    5.50
   1 -15  -9    4.10    9.00
   1 -15  -9   -4.30    7.60
  -1 -15   9   -0.80    6.20
  -1  15   9  -10.20    7.50
   0 -15  -9   -5.60   10.80
   0 -15  -9   13.40    7.00
   0 -15   9  -11.50    5.60
   0  15   9   23.50    8.50
  -1 -15  -9   -9.30    5.80
   1 -15   9    1.90    5.30
  -1 -15  -9   14.10   13.10
  -1 -15  -9   -3.40    7.60
   1  15   9   -8.70    8.10
  -7   0  10  -10.60    6.40
   7   0 -10   10.00    8.50
  -6   0  10   18.20    5.90
   6   0 -10   16.30    6.70
  -5   0  10   10.00    4.30
   5   0 -10    8.40    5.00
   4   0 -10  326.67   12.90
  -4   0  10  350.56   12.60
  -3   0  10   -2.50    2.40
   3   0 -10   -2.10    2.70
   2   0 -10   25.30    3.60
  -2   0  10   28.80    3.70
   1   0 -10   -2.00    2.10
   1   0 -10   -4.40    2.60
   0   0 -10   33.60    4.10
   0   0 -10   31.30    4.70
   1   0  10    0.60    1.90
   1   0  10    4.10    4.20
  -1   0 -10    4.50    3.10
   2   0  10    5.60    2.00
  -2   0 -10    6.70    4.00
   2   0  10   -0.50    4.60
   3   0  10   -0.70    1.30
   3   0  10   -4.80    5.40
  -3   0 -10    5.10    5.00
   4   0  10    3.20    7.80
  -4   0 -10   -0.30    6.00
  -5   0 -10    5.20    7.30
   5   0  10    4.10   10.20
  -7  -1  10   -4.90    6.30
   7  -1 -10    6.60    8.60
  -7   1  10    2.40    6.50
   7   1 -10   -2.30    8.70
  -6  -1  10   -6.50    5.00
   6  -1 -10    4.20    7.00
  -6   1  10    3.00    5.00
   6   1 -10    6.70    5.90
   5  -1 -10   54.39    7.60
  -5  -1  10   69.39    7.20
  -5   1  10   53.99    7.10
   5   1 -10   66.09    8.50
   4  -1 -10  304.97   12.40
  -4  -1  10  287.77   11.10
  -4   1  10  289.17   11.60
   4   1 -10  281.87   11.90
   3  -1 -10   22.20    4.10
  -3  -1  10   19.40    3.70
  -3   1  10   23.30    4.00
   3   1 -10   23.20    4.20
   2  -1 -10    1.40    2.30
   2   1 -10    3.00    2.30
  -2   1  10   -3.70    2.10
   1  -1 -10    1.00    3.10
   1  -1 -10    4.50    2.30
   1   1 -10   -0.50    1.90
   1   1 -10    1.60    2.30
   0  -1 -10    3.20    2.30
   0  -1 -10   -2.70    3.20
   0   1 -10    0.70    2.50
   0   1 -10    0.80    2.10
   0   1  10    0.00    2.00
   1  -1  10   26.10    3.10
   1  -1  10   19.70    4.90
  -1  -1 -10   25.10    4.70
   1   1  10   21.70    5.50
   1   1  10   24.00    3.40
  -1   1 -10   21.90    4.20
  -2  -1 -10  580.24   19.40
   2  -1  10  580.84   19.00
   2   1  10  559.54   14.60
   2   1  10  568.34   20.40
  -2   1 -10  574.04   18.30
   3  -1  10    3.70    5.30
  -3  -1 -10   -2.90    4.70
   3   1  10   -0.20    1.80
  -3   1 -10   -5.60    4.20
   3   1  10   -7.70    5.80
  -4  -1 -10   11.20    7.30
   4  -1  10   15.80    7.70
   4   1  10   11.00    8.30
  -4   1 -10   20.90    6.90
  -5  -1 -10   11.10    9.20
   5  -1  10    2.00    9.30
  -5   1 -10   10.90    7.50
   5   1  10   14.00    9.50
  -7  -2  10   -0.20    6.90
   7  -2 -10   12.80    8.00
   7   2 -10   -9.00    8.80
  -7   2  10   -6.80    6.60
   6  -2 -10   19.00    7.00
  -6  -2  10   17.90    5.90
   6   2 -10   12.10    6.90
  -6   2  10    7.30    5.70
   5  -2 -10   80.69    8.60
   5   2 -10   87.59    8.70
  -5   2  10   98.89    8.40
   4  -2 -10   30.60    5.20
  -4  -2  10   37.00    4.70
   4   2 -10   40.80    5.70
  -4   2  10   37.50    5.70
  -3  -2  10   29.70    4.00
   3  -2 -10   32.30    4.60
  -3   2  10   29.70    4.60
   3   2 -10   24.90    3.90
   2  -2 -10    5.00    3.00
   2   2 -10   11.80    3.50
   2   2 -10    6.20    2.40
   1  -2 -10   33.40    4.20
   1  -2 -10   40.80    6.00
   1   2 -10   34.80    3.50
   1   2 -10   39.90    4.50
   0  -2 -10  106.09    6.20
   0  -2 -10   98.79    7.70
   0   2  10   96.49    5.90
   0   2 -10  106.49    6.00
   0   2 -10  102.29    5.00
  -1  -2 -10  117.69    8.70
   1  -2  10  120.59    7.70
   1  -2  10  119.19    5.10
  -1   2 -10  118.89    6.80
   1   2  10  131.59    9.80
   1   2  10  128.49    6.40
   2  -2  10   97.19    3.70
   2  -2  10  102.79    8.50
  -2  -2 -10   95.39    8.80
   2   2  10   99.79   10.20
  -2   2 -10   92.69    7.20
   2   2  10  101.39    5.70
   3  -2  10   19.90    6.40
  -3  -2 -10   29.80    7.40
   3   2  10   24.80    7.00
  -3   2 -10   22.50    5.10
   3   2  10   17.10    3.00
   4  -2  10   -7.40    6.80
  -4  -2 -10   14.40    7.90
  -4   2 -10    7.10    5.30
   5  -2  10   18.00   10.20
  -5  -2 -10    2.00    8.30
   5   2  10   -7.40    9.80
  -5   2 -10    5.10    8.00
   7  -3 -10   -3.50    8.60
  -7  -3  10    3.80    6.90
   7   3 -10   34.20   10.10
  -7   3  10    9.40    7.40
   6  -3 -10    6.40    7.50
  -6  -3  10    4.10    5.30
  -6   3  10    7.20    5.50
   6   3 -10   -3.60    6.50
  -5  -3  10    6.50    4.30
   5  -3 -10   10.80    5.40
  -5   3  10    4.60    4.60
   5   3 -10   -1.00    4.30
   4  -3 -10   51.09    6.90
  -4  -3  10   55.29    5.50
  -4   3  10   66.09    7.10
   4   3 -10   63.79    6.20
  -3  -3  10  207.58    8.00
   3  -3 -10  222.38    9.90
  -3   3  10  227.38    9.90
   3   3 -10  203.18    8.50
   2  -3 -10   -3.20    2.70
   2   3 -10    1.00    2.10
   1  -3 -10    3.10    4.00
   1  -3 -10    7.50    3.00
   1   3 -10    8.50    1.90
  -1   3  10    8.30    3.00
   1   3 -10    3.30    2.30
   0  -3 -10   39.50    5.10
   0  -3 -10   44.40    6.60
   0   3  10   39.40    4.40
   0   3 -10   47.80    3.30
  -1  -3 -10   18.50    5.50
   1  -3  10   27.30    4.50
  -1   3 -10   19.30    3.40
   1   3  10   20.20    3.40
  -2  -3 -10    6.50    4.70
   2  -3  10    8.50    1.20
   2  -3  10   12.40    4.60
   2  -3  10    8.40    1.20
   2   3  10    5.90    6.50
  -2   3 -10   10.10    3.50
   2   3  10    7.80    2.90
  -3  -3 -10   39.50    7.80
   3  -3  10   22.20    6.10
  -3   3 -10   35.00    5.30
   3   3  10   26.80    3.80
   3   3  10   35.40    8.10
   4  -3  10    6.20    7.10
  -4  -3 -10   18.20    7.80
  -4   3 -10    7.10    5.90
   4   3  10   14.70    3.30
   4   3  10   -1.40    8.10
   5  -3  10    7.20    9.50
  -5  -3 -10   -4.40    9.30
  -5   3 -10   23.60    8.70
   5   3  10  -13.70    9.70
   6  -4 -10   15.40    8.10
  -6  -4  10   16.00    5.60
   6   4 -10   12.10    7.40
  -6   4  10    3.50    6.10
   5  -4 -10   14.30    6.10
  -5  -4  10   19.00    4.90
  -5   4  10   11.10    5.10
   5   4 -10    8.90    5.30
  -4  -4  10    2.40    2.90
   4  -4 -10   -5.50    3.90
   4   4 -10    1.10    3.50
  -4   4  10   -3.00    4.00
   3  -4 -10   -0.10    3.50
  -3  -4  10    0.40    2.10
   3   4 -10    1.40    2.50
  -3   4  10    8.20    3.80
   2  -4 -10   -4.30    2.90
   2  -4 -10   -4.70    4.60
   2   4 -10    6.10    2.60
   2   4 -10    0.10    1.90
   1  -4 -10   10.90    4.90
   1  -4 -10   13.30    3.70
  -1   4  10   10.30    3.50
   1   4 -10   11.50    1.80
   1   4 -10    7.20    1.90
   0  -4 -10    6.20    3.10
   0  -4 -10    4.60    4.70
   0   4  10    4.20    3.10
   0   4 -10    6.10    1.90
   0   4 -10    5.00    1.60
  -1  -4 -10  117.39    7.60
  -1  -4 -10  118.59   10.00
   1   4  10  125.59    7.30
  -2  -4 -10    2.70    4.90
   2  -4  10    7.80    3.80
  -2   4 -10    5.90    2.90
   2   4  10   -0.60    2.50
   2   4  10   -0.80    6.50
   3  -4  10   19.60    6.10
  -3  -4 -10   34.20    8.60
   3   4  10   14.40    3.60
   3   4  10   26.30    8.40
  -3   4 -10   15.50    4.30
  -4  -4 -10   20.00    8.30
   4  -4  10   21.30    7.50
   4   4  10   11.90    3.60
   4   4  10   18.00    9.70
  -4   4 -10   21.70    6.10
   5  -4  10   -9.00    8.90
  -5  -4 -10   -1.50   10.40
   5   4  10    4.70   10.50
  -5   4 -10   17.40    8.00
   6  -5 -10   15.40    7.60
  -6  -5  10    7.30    5.70
  -6   5  10   20.90    7.20
   6   5 -10   24.90    8.50
  -5  -5  10    1.50    4.10
   5  -5 -10   -3.80    5.70
   5   5 -10    0.30    5.10
  -5   5  10    7.90    5.90
  -4  -5  10   15.80    3.60
   4  -5 -10   15.60    5.10
   4   5 -10   13.40    4.60
  -4   5  10   15.70    5.30
   3  -5 -10  146.89    9.30
  -3  -5  10  195.88    7.00
  -3   5  10  206.28   10.30
   3   5 -10  195.48    8.00
   2  -5 -10   58.99    5.50
   2  -5 -10   66.79    9.00
   2   5 -10   61.99    3.50
   2   5 -10   55.59    3.60
  -2   5  10   58.99    5.40
   1  -5 -10   -1.60    4.90
   1  -5 -10    5.60    2.50
  -1   5  10    3.70    3.20
   0  -5 -10    4.80    5.30
   0  -5 -10   -3.50    2.90
   0   5  10    0.10    3.00
  -1  -5 -10  201.88    9.80
   1  -5  10  198.38    6.80
  -1  -5 -10  197.78   12.60
   1   5  10  205.18    9.20
  -1   5 -10  193.08    6.10
   2  -5  10   24.20    4.70
  -2  -5 -10   23.90    7.00
   2   5  10   21.90    4.50
   2   5  10   29.40    7.30
  -3  -5 -10   -3.00    7.40
   3  -5  10    0.00    5.10
   3   5  10   -2.00    8.00
   3   5  10   -1.00    3.20
  -3   5 -10    5.20    3.70
   4  -5  10   24.80    7.40
  -4  -5 -10   14.90    9.10
  -4   5 -10   21.20    5.90
   4   5  10   23.30    4.60
   4   5  10   37.70   11.20
  -5  -5 -10    0.20   11.50
   5  -5  10    0.10    9.40
   5   5  10  -22.00   11.00
  -5   5 -10    5.80    6.80
  -6  -6  10   26.80    6.30
  -6  -6  10   44.50    9.60
   6  -6 -10   29.30    9.20
   6   6 -10   32.80    8.00
  -6   6  10   33.00    8.30
   5  -6 -10    6.40    6.20
  -5  -6  10    4.70    3.90
  -5   6  10   12.10    6.10
   5   6 -10   -1.20    5.00
   4  -6 -10    0.90    4.40
  -4  -6  10    3.70    2.90
  -4   6  10   -4.30    4.20
   4   6 -10    3.10    3.90
   3  -6 -10   16.40    5.00
  -3  -6  10   17.70    2.60
   3   6 -10   15.70    3.20
  -3   6  10   14.40    4.30
  -3   6  10    7.80    3.80
   2  -6 -10  110.89   10.30
   2  -6 -10  106.49    8.00
  -2   6  10  108.19    7.90
   1  -6 -10   12.70    6.60
   1  -6 -10   15.10    4.20
  -1  -6  10    9.10    3.30
  -1   6  10    6.80    3.60
   0  -6 -10   43.10    7.60
   0  -6 -10   38.90    5.70
   0  -6  10   32.50    3.90
   0   6  10   30.00    4.90
  -1  -6 -10   -2.30    3.80
   1  -6  10    2.90    2.10
  -1  -6 -10    4.80    5.70
  -1   6 -10    4.80    1.30
   1   6  10    7.50    3.40
  -1   6 -10    4.30    1.30
  -2  -6 -10    9.40    5.40
   2  -6  10    1.70    3.00
   2   6  10    0.10    3.40
   2   6  10    1.50    6.60
  -2   6 -10   -2.60    3.80
   3  -6  10    4.00    4.90
  -3  -6 -10    8.60    8.20
   3   6  10    8.00    9.10
  -3   6 -10    0.60    3.20
   3   6  10    2.10    3.50
  -4  -6 -10   28.00    9.80
   4  -6  10    7.50    6.60
  -4   6 -10   14.40    5.60
   4   6  10   21.90   11.90
   4   6  10   11.00    4.80
  -6  -7  10   16.80    7.60
   6  -7 -10   12.40    8.90
  -6  -7  10   24.30    6.40
  -6   7  10   18.80    8.30
  -5  -7  10    6.20    4.40
  -5  -7  10   18.00    7.50
   5   7 -10    7.20    5.90
  -5   7  10   11.50    6.80
  -4  -7  10   -1.30    2.70
   4  -7 -10    1.50    3.50
  -4  -7  10   -1.10    3.90
  -4   7  10   -2.60    4.20
   4   7 -10    1.10    3.60
  -4   7  10    0.10    3.70
  -3  -7  10    1.10    1.60
  -3  -7  10    1.20    3.30
   3  -7 -10    3.60    4.70
  -3   7  10    2.00    4.10
   3   7 -10   -2.70    2.20
  -3   7  10    3.20    3.00
  -2  -7  10  188.48    9.90
   2  -7 -10  191.78    9.70
   2  -7 -10  170.18   13.10
  -2   7  10  177.08   10.10
  -1  -7  10   -2.70    2.70
   1  -7 -10    3.10    3.50
   1  -7 -10   -9.40    6.00
  -1   7  10   -0.20    2.80
   0  -7  10   35.00    4.30
   0  -7 -10   31.20    5.30
   0  -7 -10   18.80    5.60
   0   7  10   34.10    5.50
  -1  -7 -10   41.60    5.80
   1  -7  10   31.60    3.70
  -1  -7 -10   38.00    8.60
   1   7  10   42.90    6.00
   2  -7  10   23.50    3.90
  -2  -7 -10   20.80    8.00
  -2   7 -10   19.20    2.80
   2   7  10   17.10    4.80
   2   7  10   29.20    9.20
   3  -7  10   -2.00    4.90
  -3  -7 -10   -6.40    6.80
   3   7  10   -0.20    3.80
   3   7  10   -2.10    9.80
  -3   7 -10   -1.50    3.10
  -4  -7 -10   14.90    8.70
   4  -7  10    3.90    7.00
   4   7  10    6.00    4.90
   4   7  10  -11.00   11.70
  -4   7 -10   14.20    4.60
  -6  -8  10   13.10    9.10
   6  -8 -10    5.20    9.70
  -6  -8  10    6.70    5.60
   6   8 -10   12.40    7.60
  -6   8  10    7.40    8.20
  -6   8  10   -0.30    5.80
   5  -8 -10   -4.80    6.80
  -5  -8  10    1.50    4.20
  -5  -8  10   -7.90    6.10
  -5   8  10   -7.60    6.50
   5   8 -10    3.20    5.30
  -5   8  10    5.90    6.30
  -4  -8  10    4.50    2.90
  -4  -8  10    2.40    4.30
   4  -8 -10    3.80    5.20
   4   8 -10    7.40    4.00
  -4   8  10   -1.20    3.80
  -4   8  10    3.60    5.30
  -3  -8  10    4.50    4.60
   3  -8 -10   -0.70    4.80
  -3  -8  10    0.70    1.40
  -3   8  10    0.90    3.90
   3   8 -10    1.00    1.90
  -3   8  10   -2.60    4.60
  -2  -8  10  144.39    9.00
   2  -8 -10  151.58   11.70
   2  -8 -10  141.89    9.60
  -2   8  10  151.98    9.70
  -1  -8  10    5.80    3.50
   1  -8 -10    3.40    4.10
   1  -8 -10    2.60    6.40
  -1   8  10    4.30    4.40
   0  -8  10   61.09    5.70
   0  -8 -10   65.39    9.60
   0  -8 -10   54.29    6.20
   0   8  10   63.39    7.40
  -1  -8 -10    5.20    4.90
  -1  -8 -10    8.10    5.40
   1  -8  10   -0.70    2.30
   1   8  10    2.40    4.30
   2  -8  10   -2.10    2.60
  -2  -8 -10   -3.20    7.30
   2   8  10    1.50    4.50
  -2   8 -10   -0.60    1.80
   2   8  10    6.10    8.90
  -3  -8 -10   31.90    9.90
   3  -8  10   44.20    6.80
   3   8  10   46.50    6.50
   3   8  10   46.60   12.60
  -4  -8 -10   12.10   11.50
   4  -8  10   -1.80    6.90
  -4  -8 -10    1.20    5.60
   4   8  10    5.80   13.20
   4   8  10   -7.40    5.40
  -4   8 -10    3.40    4.20
  -5  -9  10    2.60    4.30
  -5  -9  10  -11.70    5.00
   5  -9 -10    6.90    7.50
  -5   9  10    2.60    6.80
  -5   9  10   10.20    6.80
   5   9 -10    3.00    5.50
   4  -9 -10    6.20    4.40
  -4  -9  10    5.50    4.60
  -4  -9  10    0.40    2.80
   4   9 -10    4.40    4.00
  -4   9  10   -0.20    4.50
  -4   9  10   11.20    6.30
   3  -9 -10   37.70    7.60
  -3  -9  10   33.40    6.40
  -3  -9  10   39.50    2.10
  -3   9  10   42.10    6.90
  -3   9  10   35.00    6.60
  -2  -9  10   38.60    6.20
   2  -9 -10   37.10    7.00
   2  -9 -10   50.59    9.90
  -2   9  10   40.10    6.40
   1  -9 -10    5.70    6.60
  -1  -9  10    2.20    3.70
   1  -9 -10   -1.20    3.00
  -1   9  10   -0.40    4.40
   0  -9  10   28.30    4.40
   0  -9 -10   20.60    6.10
   0  -9 -10   40.40    7.70
   0   9  10   22.90    5.50
  -1  -9 -10   12.60    5.10
   1  -9  10    4.30    2.80
  -1  -9 -10   13.20    8.20
   1   9  10   14.70    5.30
  -2  -9 -10   12.80    8.50
   2  -9  10    5.70    2.50
   2   9  10   10.50    5.40
  -2   9 -10    1.60    1.40
  -3  -9 -10   11.50    9.20
  -3  -9 -10    0.90    4.70
   3  -9  10    4.50    4.60
   3   9  10    9.20   11.90
   3   9  10    7.40    5.30
  -3   9 -10    1.50    3.50
  -4  -9 -10   14.00   11.70
  -4  -9 -10    4.10    6.20
   4  -9  10    0.20    6.90
   4   9  10   -1.70    5.60
  -4   9 -10   -1.50    4.10
   4   9  10   24.00   14.40
   5 -10 -10  -10.00    8.60
  -5 -10  10   11.00    8.20
  -5 -10  10   10.30    4.30
  -5  10  10    0.20    7.30
  -5  10  10    5.90    6.00
   5  10 -10    3.10    6.60
   4 -10 -10    2.70    5.80
  -4 -10  10    2.30    2.80
  -4 -10  10   11.90    6.60
   4  10 -10    6.50    4.20
  -4  10  10   -4.10    4.50
  -4  10  10   -0.80    5.90
   3 -10 -10    6.60    5.90
  -3 -10  10   11.70    6.00
  -3  10  10    8.00    5.90
   2 -10 -10   -0.80    8.80
  -2 -10  10    4.60    4.20
   2 -10 -10   11.60    5.80
  -2  10  10    2.50    5.70
   1 -10 -10   62.39    6.80
  -1 -10  10   65.99    6.90
  -1  10  10   84.69    9.10
   0 -10 -10   21.90    6.40
   0 -10  10   28.80    4.80
   0 -10 -10   36.90    7.90
   0  10  10   34.70    6.70
   1 -10  10    7.70    3.00
  -1 -10 -10   18.40    9.30
  -1 -10 -10    7.50    5.70
   1  10  10   13.40    5.20
  -2 -10 -10   -0.10    6.80
   2 -10  10    2.90    2.10
   2 -10  10    2.90    1.50
  -2 -10 -10    6.90    6.40
   2  10  10   10.90    5.70
  -3 -10 -10   13.70   10.70
  -3 -10 -10    8.50    5.40
   3 -10  10   -2.20    4.10
   3  10  10    2.80    5.70
   3  10  10   21.00   13.50
  -3  10 -10    0.00    3.20
  -5 -11  10   -6.00    8.10
   5 -11 -10    6.60    9.30
  -5 -11  10   -6.00    4.10
  -5  11  10    1.10    7.20
  -5  11  10   16.90    9.00
   5  11 -10   -1.20    7.00
  -4 -11  10   -0.60    6.50
   4 -11 -10   12.60    7.10
  -4 -11  10   -4.80    2.60
   4  11 -10   -6.00    4.20
  -4  11  10    2.10    5.60
  -4  11  10    8.50    5.60
   3 -11 -10   -5.10    9.30
  -3 -11  10    6.30    6.10
   3 -11 -10    7.70    5.10
  -3  11  10   10.00    5.20
  -2 -11  10    4.30    4.40
   2 -11 -10   13.10    8.70
   2 -11 -10    0.40    5.90
  -2  11  10   -6.60    5.30
  -1 -11  10    5.30    4.40
   1 -11 -10   10.40    6.80
   1 -11 -10    7.90    6.00
  -1  11  10    9.60    5.50
   0 -11  10    8.80    4.50
   0 -11 -10   10.90    6.10
   0 -11 -10   17.80    8.90
   0  11  10   14.70    6.00
  -1 -11 -10    5.10    6.40
  -1 -11 -10    9.10    9.70
   1 -11  10    6.30    3.30
   1  11  10   17.80    6.50
  -2 -11 -10  -10.50    6.00
   2 -11  10    3.40    1.90
  -2 -11 -10   21.60    8.70
   2  11  10    6.00    5.70
   3 -11  10   -1.50    4.40
  -3 -11 -10    3.80    5.90
   3  11  10    5.60   14.30
  -3  11 -10    4.70    3.10
   3  11  10   -5.00    6.50
   4 -12 -10    3.10    7.20
  -4 -12  10   20.60    8.30
  -4 -12  10    9.90    2.80
  -4  12  10    4.30    6.40
  -4  12  10   12.30    8.60
   3 -12 -10   11.00    5.70
  -3 -12  10    7.90    6.60
   3 -12 -10   -4.30    8.00
  -3  12  10   10.50    7.20
   2 -12 -10   -5.50    4.60
  -2 -12  10    1.60    5.10
   2 -12 -10    8.80    9.80
  -2  12  10   -2.20    6.30
   1 -12 -10   78.79   10.50
   1 -12 -10   71.59   13.00
  -1 -12  10   75.09    8.70
  -1  12  10   60.19    9.10
   0 -12  10    2.70    4.30
   0 -12 -10   -0.80    6.50
   0 -12 -10   28.90   10.70
   0  12  10    3.10    5.90
   1 -12  10    6.10    4.00
  -1 -12 -10    7.20    5.30
  -1 -12 -10   15.50   11.40
   1  12  10   10.50    6.60
  -2 -12 -10   33.20   12.10
   2 -12  10   24.30    3.10
  -2 -12 -10   19.10    7.10
   2  12  10   31.80    8.40
   3 -12  10    1.10    4.30
  -3 -12 -10    4.00   11.60
  -3  12 -10   -1.90    2.50
   4 -13 -10    3.10    6.60
  -4 -13  10   -5.80    7.90
  -4 -13  10    7.60    2.60
  -4  13  10    8.60    6.70
  -4  13  10   25.20    9.00
   3 -13 -10   -5.50   11.20
  -3 -13  10    9.50    7.20
   3 -13 -10   12.80    6.30
  -3  13  10    8.80    6.00
  -2 -13  10   -8.10    5.50
   2 -13 -10   -3.90    5.40
   2 -13 -10   -6.20    8.10
  -2  13  10   -4.80    5.00
   1 -13 -10    6.60    5.60
   1 -13 -10    4.20    9.60
  -1 -13  10    6.60    5.80
  -1  13  10    6.70    6.60
   0 -13 -10   21.30   11.10
   0 -13 -10   24.00    7.80
   0 -13  10    5.30    4.90
   0  13  10    4.70    4.80
   1 -13  10   -4.60    4.20
  -1 -13 -10   -2.60   11.00
  -1 -13 -10   -3.80    6.70
   1  13  10    7.80    7.50
  -2 -13 -10   25.90   12.70
  -2 -13 -10   28.40    9.10
   2 -13  10   17.40    3.30
  -2 -13 -10   19.30    6.70
   2  13  10   37.80    9.20
  -3 -14  10   -6.40    5.30
   3 -14 -10   14.70    8.90
   3 -14 -10   -5.40   13.30
  -3  14  10    1.80    8.90
  -2 -14  10    5.50    6.00
   2 -14 -10   -2.40    8.10
   2 -14 -10    1.50   11.40
  -2  14  10  -10.10    7.70
   1 -14 -10   18.40   11.90
  -1 -14  10   -3.90    5.70
   1 -14 -10    9.10    8.20
  -1  14  10   13.40    6.20
   0 -14  10   11.30    5.60
   0 -14 -10   10.40    6.60
   0 -14 -10   17.90   10.50
   0  14  10   17.20    5.80
  -1 -14 -10  -13.30    8.30
   1 -14  10    3.80    4.90
  -1 -14 -10   11.40   10.60
   1  14  10    5.80    8.30
   1 -15 -10    9.70    9.10
   1 -15 -10    0.90    6.30
  -1 -15  10    1.00    6.60
  -1  15  10    2.80    8.00
  -6   0  11   -0.20    5.70
   6   0 -11   -3.50    7.00
   5   0 -11    5.10    5.60
  -5   0  11   -1.60    4.00
  -4   0  11    5.20    3.90
   4   0 -11    7.40    4.30
  -3   0  11   -1.90    2.70
   3   0 -11   -7.70    2.80
   2   0 -11    1.00    2.50
   2   0 -11    1.50    3.50
   1   0 -11   68.79    5.20
   1   0 -11   56.79    6.20
   0   0 -11    1.30    3.40
   0   0 -11    0.70    2.50
  -1   0 -11  124.39    7.10
  -1   0 -11  121.39    8.50
   1   0  11  121.89    6.20
   2   0  11    9.60    5.60
   2   0  11   -0.80    2.00
  -2   0 -11   -3.00    4.40
   3   0  11   67.59    3.40
  -3   0 -11   74.89    9.20
   3   0  11   72.79    9.70
   4   0  11   -7.80    7.50
  -4   0 -11   11.40    7.40
  -6  -1  11    6.20    5.40
   6  -1 -11    2.90    6.50
  -6   1  11    1.90    5.90
   6   1 -11   15.60    6.90
  -5  -1  11    9.90    4.60
   5  -1 -11    7.10    5.50
   5   1 -11   -1.70    5.10
  -5   1  11    6.30    4.90
   4  -1 -11    3.90    4.50
  -4  -1  11    8.20    3.70
   4   1 -11    7.70    3.90
  -4   1  11    4.20    3.60
  -3  -1  11    1.00    2.90
   3  -1 -11    2.90    3.20
   3   1 -11    1.70    3.10
  -3   1  11    2.80    3.30
   2  -1 -11    9.30    4.40
   2  -1 -11    7.80    3.30
   2   1 -11    7.90    2.50
   2   1 -11    9.60    3.90
   1  -1 -11    0.30    2.60
   1  -1 -11   -0.70    3.40
   1   1 -11    3.00    2.20
   1   1 -11   -5.30    2.80
   0  -1 -11   45.10    6.30
   0  -1 -11   39.50    5.10
   0   1 -11   41.80    4.20
   0   1  11   35.10    4.40
   0   1 -11   36.80    4.90
   1  -1  11   28.10    3.40
  -1  -1 -11   28.30    4.90
   1   1  11   29.90    4.00
  -1   1 -11   35.10    5.20
  -1   1 -11   30.20    4.10
  -2  -1 -11   47.40    7.50
   2  -1  11   54.79    7.70
   2  -1  11   41.90    3.60
   2   1  11   54.19    8.30
   2   1  11   46.70    4.40
  -2   1 -11   45.20    6.50
  -3  -1 -11   28.50    7.60
   3  -1  11   26.20    7.00
  -3   1 -11   26.50    6.40
   3   1  11   25.10    3.00
   3   1  11   37.90    8.40
   4  -1  11    2.70    7.90
  -4  -1 -11   13.10    8.30
   4   1  11    1.70    8.20
  -4   1 -11   -0.70    6.60
  -6  -2  11   -2.00    5.30
   6  -2 -11   -0.80    7.40
   6   2 -11    3.30    6.70
  -6   2  11    5.90    5.80
   5  -2 -11   36.20    7.10
  -5  -2  11   19.10    5.00
   5   2 -11   22.60    5.50
  -5   2  11   21.20    6.00
  -4  -2  11   23.30    4.50
   4  -2 -11   19.80    5.10
  -4   2  11   20.90    5.00
   4   2 -11   12.10    4.40
   3  -2 -11   91.79    7.10
  -3  -2  11   87.09    5.90
   3   2 -11   91.59    6.40
  -3   2  11   70.99    6.70
   2  -2 -11   14.10    3.90
   2  -2 -11   25.50    5.50
   2   2 -11    9.30    2.90
   2   2 -11   11.60    3.80
   1  -2 -11   62.59    5.30
   1  -2 -11   64.89    7.50
   1   2 -11   66.99    4.60
   1   2 -11   64.09    5.70
   0  -2 -11    8.60    3.20
   0  -2 -11   14.00    5.00
   0   2 -11   11.90    2.70
   0   2  11    7.30    3.10
   0   2 -11   15.00    3.20
  -1  -2 -11   38.70    5.20
  -1  -2 -11   30.50    6.20
   1  -2  11   41.70    3.80
   1   2  11   40.00    4.50
  -1   2 -11   47.00    5.40
  -1   2 -11   33.40    4.20
  -2  -2 -11   71.99    9.50
   2  -2  11   47.50    3.20
   2  -2  11   45.90    7.00
   2   2  11   45.60    5.00
   2   2  11   52.99    8.90
  -2   2 -11   48.90    6.50
   3  -2  11   12.00    6.20
  -3  -2 -11    6.60    7.20
   3   2  11   17.80    7.80
  -3   2 -11   30.90    6.20
   3   2  11   13.50    2.90
   4  -2  11   -1.00    7.90
  -4  -2 -11    7.20    8.20
   4   2  11   -2.50    8.80
  -4   2 -11    0.10    6.00
  -6  -3  11   -3.90    5.40
   6  -3 -11   -8.80    6.30
   6   3 -11  -13.80    6.20
  -6   3  11   -2.20    5.80
  -5  -3  11   83.59    7.70
   5  -3 -11   95.69   10.10
  -5   3  11  100.59    9.50
   5   3 -11   93.09    9.50
   4  -3 -11    5.30    4.70
  -4  -3  11   -0.10    3.10
   4   3 -11   -8.20    3.50
  -4   3  11   -1.10    4.00
   3  -3 -11   57.89    6.00
  -3  -3  11   64.89    4.90
  -3   3  11   70.59    7.10
   3   3 -11   62.69    5.80
   2  -3 -11   -6.10    3.00
   2  -3 -11   -2.90    4.70
   2   3 -11   -0.30    2.30
   1  -3 -11    1.20    4.50
   1  -3 -11   -3.80    2.90
  -1   3  11    5.30    3.10
   1   3 -11    2.70    1.70
   1   3 -11   -3.70    2.30
   0  -3 -11   20.60    4.20
   0  -3 -11   23.00    6.30
   0   3 -11   25.00    2.90
   0   3  11   13.00    3.50
  -1  -3 -11  124.39    7.70
  -1  -3 -11  120.79    9.90
   1  -3  11  119.39    5.40
  -1   3 -11  115.39    5.80
  -1   3 -11  128.49    6.90
   1   3  11  128.39    7.20
  -2  -3 -11   22.00    6.40
   2  -3  11   22.90    2.00
   2  -3  11   19.30    2.00
   2  -3  11   11.90    5.50
   2   3  11   30.30    8.00
   2   3  11   21.50    3.90
  -2   3 -11   17.00    4.00
  -3  -3 -11   -1.40    7.30
   3  -3  11   -2.70    5.00
   3   3  11    4.00    8.30
   3   3  11    4.70    3.10
  -3   3 -11    2.30    4.00
  -4  -3 -11    5.30    8.60
   4  -3  11    7.20    8.10
   4   3  11    3.50    3.20
   4   3  11    6.20    9.20
  -4   3 -11   13.50    6.60
  -6  -4  11   10.40    5.90
   6  -4 -11   13.40    8.10
  -6   4  11    1.80    5.80
   6   4 -11    2.80    7.50
   5  -4 -11   32.70    7.40
  -5  -4  11   40.00    5.60
  -5   4  11   45.70    7.70
   5   4 -11   31.40    6.80
   4  -4 -11   -0.90    4.60
  -4  -4  11   -0.10    2.90
  -4   4  11    3.20    4.40
   4   4 -11   11.60    4.30
  -3  -4  11  168.38    6.90
   3  -4 -11  176.58    9.80
  -3   4  11  170.78    9.80
   3   4 -11  175.78    7.60
   2  -4 -11    8.50    6.00
   2   4 -11    0.50    2.70
   2   4 -11   -2.80    2.00
   1  -4 -11   13.00    3.90
   1  -4 -11    6.20    4.90
   1   4 -11   10.20    1.90
  -1   4  11    5.00    3.40
   1   4 -11    8.90    2.10
   0  -4 -11    8.20    3.80
   0  -4 -11    7.30    5.30
   0   4 -11    6.40    2.30
   0   4 -11    5.70    1.80
   0   4  11    6.40    3.20
  -1  -4 -11   19.80    6.40
  -1  -4 -11   24.40    5.00
   1   4  11   22.20    4.50
  -1   4 -11   22.20    3.10
  -2  -4 -11  215.78   13.40
   2  -4  11  174.28   10.20
   2   4  11  190.88   14.40
   2   4  11  181.78    8.80
  -2   4 -11  196.88    8.60
   3  -4  11    2.00    5.60
  -3  -4 -11   -5.40    6.30
   3   4  11   -9.90    7.40
   3   4  11    5.30    3.40
  -3   4 -11   -2.20    4.10
  -4  -4 -11   10.20    9.00
   4  -4  11    9.80    8.50
   4   4  11   20.20    9.60
   4   4  11    9.90    3.90
  -4   4 -11    6.00    6.30
   6  -5 -11   16.30    8.20
  -6  -5  11   10.60    5.80
   6   5 -11   17.30    7.80
  -6   5  11   18.40    7.30
   5  -5 -11   17.50    6.40
  -5  -5  11   16.70    4.90
   5   5 -11   21.70    6.70
  -5   5  11   21.30    6.80
   4  -5 -11   -0.90    4.70
  -4  -5  11    1.90    3.00
   4   5 -11    4.00    4.20
  -4   5  11   -1.50    4.50
   3  -5 -11   13.80    5.20
  -3  -5  11   13.20    2.70
   3   5 -11   10.50    3.20
  -3   5  11   15.80    4.70
   2  -5 -11    8.20    4.10
   2  -5 -11   18.10    6.60
  -2   5  11   19.30    4.50
   2   5 -11    9.30    2.30
   2   5 -11   11.30    2.10
   1  -5 -11   14.00    3.80
   1  -5 -11   16.60    5.40
  -1   5  11   19.80    4.00
   0  -5 -11  109.59    7.60
   0  -5 -11  108.99   11.10
   0   5 -11  109.59    2.60
   0   5  11  105.69    7.90
   0   5 -11   90.19    2.40
  -1  -5 -11  194.38   13.50
  -1  -5 -11  168.08    9.80
   1  -5  11  183.28    6.90
  -1   5 -11  189.28    6.10
   1   5  11  191.58    9.50
   2  -5  11    2.70    4.60
  -2  -5 -11   23.70    7.60
   2   5  11   19.90    9.00
   2   5  11    7.00    3.90
  -3  -5 -11    2.40    7.20
   3  -5  11   -1.00    5.20
   3   5  11   -0.60    3.30
  -3   5 -11    2.40    4.00
   3   5  11   -0.40    9.20
  -4  -5 -11   26.60    9.90
   4  -5  11   15.60    8.30
  -4   5 -11   12.30    6.10
   4   5  11   13.10    4.70
   4   5  11   15.80    8.90
   6  -6 -11   17.60    8.90
  -6  -6  11   18.70    8.10
  -6  -6  11   23.40    6.70
   6   6 -11    9.90    7.80
  -6   6  11   13.20    6.40
  -5  -6  11   -0.70    4.10
   5  -6 -11   -3.70    4.80
  -5   6  11   11.90    6.00
   5   6 -11    3.70    5.50
   4  -6 -11   -3.80    5.10
  -4  -6  11   -0.10    2.80
  -4   6  11    1.10    4.60
   4   6 -11    0.90    3.80
   3  -6 -11    7.30    4.80
  -3  -6  11   10.00    2.40
   3   6 -11   11.60    3.10
  -3   6  11    8.70    4.80
  -3   6  11   20.10    5.20
   2  -6 -11   32.90    5.90
   2  -6 -11   27.80    7.50
  -2   6  11   36.50    6.40
   1  -6 -11   28.90    5.20
  -1  -6  11   32.90    4.90
   1  -6 -11   29.10    6.30
  -1   6  11   21.90    4.90
   0  -6 -11   19.80    7.20
   0  -6 -11   26.30    5.30
   0  -6  11   31.80    4.30
   0   6  11   26.80    4.80
   1  -6  11   80.99    4.80
  -1  -6 -11  106.19    8.60
  -1  -6 -11   78.39   10.90
  -1   6 -11   74.49    2.90
   1   6  11   87.29    7.40
  -1   6 -11   78.39    3.00
  -2  -6 -11   -2.90    7.50
   2  -6  11    2.90    3.70
  -2   6 -11   -3.00    3.00
   2   6  11   -3.50    3.70
   2   6  11   -3.60    7.70
  -3  -6 -11   14.40    7.20
   3  -6  11   25.90    6.20
  -3   6 -11   16.20    4.60
   3   6  11   25.10    4.80
   3   6  11   24.30   10.50
   4  -6  11  -16.30    7.30
  -4  -6 -11    5.30    9.80
   4   6  11    6.20   11.50
   4   6  11    0.00    4.60
  -4   6 -11    3.90    5.20
  -6  -7  11   17.10    9.40
  -6  -7  11    3.20    5.80
   6  -7 -11   20.70    8.00
   6   7 -11   -2.30    8.10
  -6   7  11   -0.90    5.90
   5  -7 -11   15.20    7.30
  -5  -7  11    2.20    4.20
  -5  -7  11   -1.80    5.40
  -5   7  11   11.80    6.10
   5   7 -11   -0.20    5.70
  -4  -7  11   -2.10    2.60
  -4  -7  11   -1.20    5.50
   4  -7 -11    4.30    4.90
   4   7 -11    0.60    3.70
  -4   7  11    1.60    4.00
  -4   7  11  -12.70    4.90
   3  -7 -11    3.40    4.80
  -3  -7  11   -2.60    4.10
   3   7 -11   -0.50    2.00
   3   7 -11    2.30    2.10
  -3   7  11    1.00    4.90
  -3   7  11    5.20    5.00
   2  -7 -11    6.40    4.80
   2  -7 -11   -7.00    6.40
  -2  -7  11   -1.90    4.10
  -2   7  11   -1.70    3.10
   1  -7 -11   -0.30    4.10
  -1  -7  11    5.40    3.70
   1  -7 -11   11.70    5.40
  -1   7  11   15.70    5.30
   0  -7  11   18.90    3.90
   0  -7 -11   24.00    5.60
   0  -7 -11   15.00    6.50
   0   7  11   15.10    5.20
  -1  -7 -11   65.39    6.90
  -1  -7 -11   65.09   10.30
   1  -7  11   71.69    4.80
   1   7  11   61.69    7.60
   2  -7  11    5.90    3.50
  -2  -7 -11   -7.00    7.10
   2   7  11    2.50    4.20
  -2   7 -11    1.90    2.20
   2   7  11    3.30    7.90
   3  -7  11    0.00    5.70
  -3  -7 -11    4.40    9.00
   3   7  11   -4.00    8.00
   3   7  11    1.90    4.50
   4  -7  11   -3.10    7.90
  -4  -7 -11   13.50   12.00
   4   7  11    5.70    5.70
   4   7  11   -3.50   12.50
  -5  -8  11    1.80    7.70
  -5  -8  11   -1.20    4.30
   5  -8 -11   -1.80    7.90
  -5   8  11    9.20    5.40
  -5   8  11    1.10    5.00
   5   8 -11    0.60    5.60
  -4  -8  11   -2.50    6.10
  -4  -8  11    1.00    2.50
   4  -8 -11    0.50    5.70
  -4   8  11    4.80    6.00
  -4   8  11    4.90    5.90
   4   8 -11    1.60    3.90
  -3  -8  11   -0.90    4.70
   3  -8 -11   -0.30    5.60
  -3   8  11   10.20    4.30
   2  -8 -11   26.90    5.10
   2  -8 -11   21.60    9.10
  -2  -8  11   29.70    5.70
  -2   8  11   32.50    6.30
   1  -8 -11   -4.70    5.90
   1  -8 -11   -1.90    4.20
  -1  -8  11    0.30    3.70
  -1   8  11   -2.80    3.60
   0  -8 -11   55.59    9.40
   0  -8 -11   63.29    8.30
   0  -8  11   69.19    6.10
   0   8  11   59.89    7.40
  -1  -8 -11  106.99   13.50
  -1  -8 -11  133.09   10.40
   1  -8  11  122.99    6.20
   1   8  11  102.39    9.30
  -2  -8 -11   -2.90    8.60
  -2  -8 -11    0.90    4.50
   2  -8  11    1.60    2.90
  -2   8 -11    2.00    1.70
   2   8  11   -8.00    4.30
  -3  -8 -11   30.30    9.90
   3  -8  11   11.10    5.20
  -3   8 -11    3.40    3.50
   3   8  11    0.00   10.60
   3   8  11   19.30    5.70
   5  -9 -11    8.70    6.80
  -5  -9  11   10.30    4.60
  -5  -9  11   10.30    8.00
  -5   9  11   11.70    6.00
  -5   9  11   18.00    8.00
   5   9 -11    2.20    6.10
  -4  -9  11    5.60    2.50
   4  -9 -11   -6.20    5.80
  -4  -9  11    4.80    6.90
   4   9 -11    1.00    4.00
  -4   9  11    7.10    6.90
  -4   9  11   -0.30    4.90
   3  -9 -11   -1.10    8.70
   3  -9 -11  -13.00    5.60
  -3  -9  11    4.40    4.00
  -3   9  11   -2.50    4.10
  -2  -9  11    0.00    4.60
   2  -9 -11    8.50    4.50
   2  -9 -11    2.50    6.40
  -2   9  11   -4.10    5.10
  -1  -9  11    5.80    3.60
   1  -9 -11   -8.10    4.60
   1  -9 -11   -6.90    7.50
  -1   9  11   -0.30    4.80
   0  -9  11  107.49    7.30
   0  -9 -11   93.39   12.20
   0  -9 -11   86.49    8.20
   0   9  11   93.29    9.40
   1  -9  11   17.00    3.40
  -1  -9 -11  -13.50    8.80
  -1  -9 -11   19.70    5.40
   1   9  11   17.80    5.60
  -2  -9 -11   13.30    6.60
  -2  -9 -11    2.80    6.80
   2   9  11   10.90    5.80
   3  -9  11    5.80    4.60
  -3  -9 -11   -1.10    9.20
[truncated: 41,513 more chars]
